# Supplementary material for: Expanded genome-wide comparisons give novel insights into population structure and genetic heterogeneity of Leishmania tropica complex
Source: PLoS Negl Trop Dis. 2020 Sep 18;14(9):e0008684. doi: 10.1371/journal.pntd.0008684 (PMC7526921; doi:10.1371/journal.pntd.0008684)
Supplement: S5 Table — (XLSX) [file pntd.0008684.s008.xlsx]

## Sheet: Sheet1
					Population I (SNPs)							Population II (SNPs)							Population III (SNPs)									Population IV (SNPs)															Population V (SNPs)
					Ltr16		Ma-37		MN-11			E50		LRC-L747		LRC-L810			Ackerman		Boone		Melloy		K26_1			Azad		K112		KK27		Kubba		LT1		LT2		Rupert			ATCC50129
Transcript id	Genomic Location (Gene)	Protein Length	CDS Length	Product Description	dN/dS	dN+dS	dN/dS	dN+dS	dN/dS	dN+dS	Mean dN+dS POP-I	dN/dS	dN+dS	dN/dS	dN+dS	dN/dS	dN+dS	Mean dN+dS POP-II	dN/dS	dN+dS	dN/dS	dN+dS	dN/dS	dN+dS	dN/dS	dN+dS	Mean dN+dS POP-III	dN/dS	dN+dS	dN/dS	dN+dS	dN/dS	dN+dS	dN/dS	dN+dS	dN/dS	dN+dS	dN/dS	dN+dS	dN/dS	dN+dS	Mean dN+dS POP-IY	dN/dS	dN+dS	difference dN+dS POPII/I	difference dN+dS POPII/III	difference dN+dS POPII/IV	difference dN+dS POPII/V	Mean difference dN+dS
LTRL590_360057000.1	LtrL590_36:1,809,019..1,809,987(+)	322	969	hypothetical protein, conserved (SNPs PCA - population III - Figure 3)	0.666667	5	1	4	1	6	5	1.2	11	1.2	11	1.6	13	11.6667	1.25	9	1.25	9	1.25	9	1.25	9	9	1.2	11	1.25	9	1.25	9	1.25	9	1.25	9	1.25	9	1.25	9	8.17857	1	8	6.66667	2.66667	3.4881	3.66667	4.12202
LTRL590_010009000.1	LtrL590_01:104,881..106,563(+)	560	1683	hypothetical protein, conserved (SNPs PCA - population II - Figure 3)	0	2	#DIV/0!	0	#DIV/0!	0	0.666667	2	21	1.75	22	2	21	21.3333	#DIV/0!	0	#DIV/0!	0	#DIV/0!	0	2	18	4.5	1.75	22	1.83333	17	2.4	17	2	18	1.71429	19	2	18	2	18	16.1429	#DIV/0!	0	20.6667	16.8333	5.19048	21.3333	16.006
LTRL590_340009700.1	LtrL590_34:156,696..159,596(+)	966	2901	hypothetical protein, conserved (SNPs PCA - population IV - Figure 3)	3	20	2.8	19	4.33333	16	18.3333	1.84615	37	1.76923	36	1.76923	36	36.3333	2	39	2	39	2	39	1.92308	38	38.75	1.76923	36	2	39	2.07692	40	2	39	2	39	1.84615	37	2	39	33.1429	7	8	18	-2.41667	3.19048	28.3333	11.7768
LTRL590_150007800.1	LtrL590_15:94,816..100,653(+)	1945	5838	hypothetical protein, conserved	2.71429	26	1.88889	26	1.8	28	26.6667	1.5	45	1.5	45	0.92	48	46	1.43478	56	1.43478	56	1.43478	56	1.43478	56	56	1.5	45	1.43478	56	1.43478	56	1.43478	56	1.43478	56	1.43478	56	1.43478	56	46.6335	1.57143	18	19.3333	-10	-0.63354	28	9.17495
LTRL590_190007400.1	LtrL590_19:100,112..104,671(+)	1519	4560	hypothetical protein, conserved	1.29412	39	1.05263	39	1.23529	38	38.6667	1.6	26	1.6	26	2.8	19	23.6667	1.05556	37	1.05556	37	1.05556	37	1.05556	37	37	1.6	26	1.05556	37	1.05556	37	1.11111	38	1.05556	37	1.05556	37	1.05556	37	30.3016	0	1	-15	-13.3333	-6.63492	22.6667	-3.0754
LTRL590_200017700.1	LtrL590_20:523,909..526,374(+)	821	2466	cysteine peptidase, Clan CA, family C2, putative (Suppl Table 6 - [21])	4	10	3.5	9	4	10	9.66667	3	8	3	8	2.5	14	10	2.66667	11	2.66667	11	2.66667	11	2.66667	11	11	3	8	2.66667	11	2.66667	11	2.66667	11	2.66667	11	2.66667	11	2.66667	11	9.38095	4	10	0.333333	-1	0.619048	0	-0.0119048
LTRL590_000009800.1	LTRL590_SCAF000036:44,501..45,148(+)	215	648	hypothetical protein, conserved (Suppl. Table 6 - [21])	0.666667	5	0.666667	5	0.666667	5	5	1	4	1	4	1	6	4.66667	2	3	2	3	2	3	1	8	4.25	1	4	1	8	1	8	1	8	1	8	1	8	1	8	6.42857	1	8	-0.333333	0.416667	-1.7619	-3.33333	-1.25298
LTRL590_120006700.1	LtrL590_12:42,992..44,374(+)	460	1383	hypothetical protein, conserved (Suppl. Table 6 - [21])	5	6	2.5	7	2	9	7.33333	6	7	7	8	4	10	8.33333	2.25	13	2.25	13	2.25	13	2.25	13	13	7	8	2.25	13	2.25	13	2.25	13	2.25	13	2.25	13	2.25	13	10.75	1.5	5	1	-4.66667	-2.41667	3.33333	-0.6875
LTRL590_040009100.1	LtrL590_04:162,904..165,477(-)	857	2574	cysteine peptidase, Clan CA, family C2, putative (Suppl Table 6 - [21])	1.66667	16	1.5	15	2	15	15.3333	0.8	18	0.8	18	1.44444	22	19.3333	1.3	23	1.3	23	1.3	23	1.3	23	23	0.8	18	1.3	23	1.18182	24	1.3	23	1.3	23	1.3	23	1.3	23	19.3286	0.714286	12	4	-3.66667	0.0047619	7.33333	1.91786
LTRL590_270033000.1	LtrL590_27:1,093,161..1,093,958(+)	265	798	hypothetical protein, conserved (Suppl. Table 6 - [21])	1.72727	30	1.81818	31	1.63636	29	30	6.75	31	4.16667	31	2.66667	44	35.3333	1.54545	28	1.61538	34	1.90909	32	1.5	15	27.25	4.16667	31	1.75	33	2	36	2	30	2	39	2.5	28	1.92308	38	29.5714	1.71429	19	5.33333	8.08333	5.7619	16.3333	8.87798
LTRL590_000026500.1	LTRL590_SCAF000118:12,449..12,685(-)	78	237	Protein of unknown function (DUF3586), putative (Suppl Table 7 - [21])	#DIV/0!	0	#DIV/0!	0	#DIV/0!	1	0.333333	0	1	0	1	0	1	1	0	1	0	1	0	1	0	1	1	0	1	0	1	0	1	0	1	0	1	0	1	0	1	0.857143	0	1	0.666667	0	0.142857	0	0.202381
LTRL590_140018700.1	LtrL590_14:540,441..540,947(+)	168	507	hypothetical protein (Suppl Table 7 - [21])	1	4	2	3	2	3	3.33333	0.4	7	0.4	7	0.333333	4	6	2	3	2	3	2	3	2	3	3	0.4	7	2	3	1	4	1	4	2	3	2	3	2	3	3.42857	0.333333	4	2.66667	3	2.57143	2	2.55952
LTRL590_340012500.1	LtrL590_34:304,381..304,764(-)	127	384	hypothetical protein (Suppl Table 7 - [21])	#DIV/0!	1	#DIV/0!	1	#DIV/0!	1	1	0	2	0	2	0	2	2	#DIV/0!	1	#DIV/0!	1	#DIV/0!	1	1	4	1.75	0	2	1	4	1	4	1	4	1	4	1	4	1	4	3.28571	#DIV/0!	1	1	0.25	-1.28571	1	0.241071
LTRL590_220017300.1	LtrL590_22:488,995..490,194(-)	399	1200	hypothetical protein, conserved (Suppl Table 7 - [21])	0.833333	11	0.5	9	0.333333	8	9.33333	2	12	2	12	1.66667	8	10.6667	0.714286	12	0.714286	12	0.714286	12	0.714286	12	12	2	12	0.714286	12	0.555556	14	0.625	13	0.714286	12	0.714286	12	0.714286	12	10.6607	0.833333	11	1.33333	-1.33333	0.00595238	-0.333333	-0.0818452
LTRL590_160022000.1	LtrL590_16:647,823..648,116(-)	97	294	hypothetical protein (Suppl Table 7 - [21])	4	5	3.5	9	3	8	7.33333	1	4	0.5	3	1	6	4.33333	2	6	3	8	3	8	3	8	7.5	0.5	3	2	6	3	8	2	3	3	8	2	3	2	3	4.71429	2	6	-3	-3.16667	-0.380952	-1.66667	-2.05357
LTRL590_300009600.1	LtrL590_30:136,303..137,574(-)	423	1272	Alpha/beta hydrolase family, putative (Suppl Table 7 - [21])	0	5	0.166667	7	0	5	5.66667	0.166667	7	0.166667	7	0.285714	9	7.66667	0.285714	9	0.285714	9	0.285714	9	0.285714	9	9	0.166667	7	0.285714	9	0.285714	9	0.285714	9	0.285714	9	0.285714	9	0.285714	9	7.46939	0.285714	9	2	-1.33333	0.197279	-1.33333	-0.117347
LTRL590_160021900.1	LtrL590_16:645,404..645,796(-)	130	393	kinesin, putative (Suppl Table 7 - [21])	#DIV/0!	3	5	6	4	5	4.66667	1	8	0.833333	11	1	6	8.33333	4.5	11	3.5	9	7	8	6	7	8.75	0.833333	11	9	10	4.5	11	4.5	11	4.5	11	#DIV/0!	2	7	8	8.21429	5	6	3.66667	-0.416667	0.119048	2.33333	1.4256
LTRL590_360009900.1	LtrL590_36:119,853..121,706(-)	617	1854	vacuolar protein sorting-associated protein 45, putative (Suppl Table 7)	#DIV/0!	1	#DIV/0!	2	#DIV/0!	1	1.33333	0.181818	13	0.181818	13	0.1	11	12.3333	0.2	6	0.2	6	0	5	0.2	6	5.75	0.181818	13	0.2	6	0.166667	7	0.2	6	0.2	6	0.5	3	0.2	6	5.88571	0	4	11	6.58333	6.44762	8.33333	8.09107
LTRL590_300021900.1	LtrL590_30:563,608..564,778(+)	390	1170	hypothetical protein, conserved (Suppl Table 7 - [21])	2.5	7	0.5	6	2.5	7	6.66667	1	4	1	4	0.25	5	4.33333	2	9	2	9	2	9	2.5	7	8.5	1	4	2	9	1.66667	8	1.66667	8	3	8	3	8	2	9	6.80952	2	3	-2.33333	-4.16667	-2.47619	1.33333	-1.91071
LTRL590_360030100.1	LtrL590_36:899,162..900,997(+)	611	1836	vacuolar protein sorting-associated protein 45- like protein (Suppl Table 7)	0	3	0	3	0	3	3	0.222222	11	0.222222	11	0.3	13	11.6667	0.333333	8	0.333333	8	0.333333	8	0.285714	9	8.25	0.222222	11	0.285714	9	0.285714	9	0.285714	9	0.285714	9	0.285714	9	0.285714	9	8.04082	0.142857	8	8.66667	3.41667	3.62585	3.66667	4.84396
LTRL590_000026600.1	LTRL590_SCAF000118:12,716..13,780(-)	354	1065	cathepsin L-like protease (Suppl Table 7 - [21])	4	5	#DIV/0!	3	#DIV/0!	4	4	3.33333	13	3.33333	13	4	15	13.6667	4	10	4	10	4	10	4	10	10	3.33333	13	4	10	4	10	4	10	4	10	4	10	4	10	9.57143	7	8	9.66667	3.66667	4.09524	5.66667	5.77381
LTRL590_160022200.1	LtrL590_16:651,652..652,335(-)	226	681	hypothetical protein (Suppl Table 7 - [21])	1	2	0.5	3	0.5	3	2.66667	0.333333	8	0.5	6	0	5	6.33333	0.166667	7	0.166667	7	0.166667	7	0.166667	7	7	0.5	6	0.166667	7	0.166667	7	0.166667	7	0.285714	9	0.166667	7	0.166667	7	6.16667	#DIV/0!	0	3.66667	-0.666667	0.166667	6.33333	2.375
LTRL590_160022100.1	LtrL590_16:648,615..650,768(-)	717	2154	kinesin, putative (Suppl Table 7)	1	2	0.666667	5	0	1	2.66667	0.25	10	0.222222	11	0.5	9	10	0.6	8	0.4	7	0.6	8	0.6	8	7.75	0.222222	11	0.6	8	0.6	8	0.75	7	0.5	9	0.4	7	0.4	7	7.25	0	1	7.33333	2.25	2.75	9	5.33333
LTRL590_340029900.1	LtrL590_34:962,840..965,578(-)	912	2739	hypothetical protein, conserved (Suppl Table 7)	0.7	17	0.666667	15	0.666667	20	17.3333	0.625	26	0.625	26	0.352941	23	25	0.857143	13	0.857143	13	0.857143	13	0.8	27	16.5	0.625	26	0.571429	22	0.5	21	0.714286	24	0.533333	23	0.642857	23	0.571429	22	19.6735	0.571429	11	7.66667	8.5	5.32653	14	8.8733
LTRL590_340030000.1	LtrL590_34:965,930..966,900(-)	323	969	hypothetical protein, conserved (Suppl Table 7 - [21])	1.33333	7	1	8	0.8	9	8	1.66667	16	1.66667	16	1.5	15	15.6667	1	8	1	8	1	8	1.57143	18	10.5	1.66667	16	1.25	18	1.42857	17	1.57143	18	1.42857	17	1.42857	17	1.42857	17	14.7959	1	6	7.66667	5.16667	0.870748	9.66667	5.84269
LTRL590_340012700.1	LtrL590_34:309,588..313,067(-)	1125	3378	flagellar attachment zone protein, putative (Suppl Table 7)	1.375	19	1.5	10	1.5	15	14.6667	1.375	19	1.375	19	1.08333	25	21	1.16667	13	1.4	12	1.8	14	1.44444	22	15.25	1.375	19	1.75	22	1.85714	20	1.625	21	1.75	22	2	24	1.625	21	18.5179	1.25	9	6.33333	5.75	2.48214	12	6.64137
LTRL590_140018500.1	LtrL590_14:531,127..534,699(+)	815	2448	kinesin K39, putative (Suppl Table 7)	0.888889	17	0.545455	17	0.9	19	17.6667	0.2	12	0	8	0.2	12	10.6667	0.8	18	0.857143	13	0.666667	15	0.666667	20	16.5	0	8	0.692308	22	0.75	21	0.666667	20	0.666667	20	0.8	18	0.666667	20	15.6667	6	7	-7	-5.83333	-5	3.66667	-3.54167
LTRL590_140018200.1	LtrL590_14:521,022..524,537(+)	598	1797	kinesin K39, putative (Suppl Table 7)	0.833333	22	0.444444	13	0.875	15	16.6667	1.33333	7	1	8	1.33333	7	7.33333	0	1	0	1	0	1	0.555556	14	4.25	1	8	0.555556	14	0.5	12	0.666667	15	0.666667	15	0.428571	10	0.555556	14	10.5238	1	2	-9.33333	3.08333	-3.19048	5.33333	-1.02679
LTRL590_140018600.1	LtrL590_14:537,446..540,332(+)	962	2886	kinesin K39, putative (Suppl Table 7)	1.7	27	1	22	0.75	14	21	2	24	2	24	1	20	22.6667	1.14286	15	1.6	13	1.14286	15	1.6	13	14	2	24	1.14286	15	1.28571	16	1.28571	16	1.14286	15	1.42857	17	1.14286	15	14.7551	#DIV/0!	2	1.66667	8.66667	7.91156	20.6667	9.72789
LTRL590_300017000.1	LtrL590_30:358,876..366,681(+)	2601	7806	IQ calmodulin-binding motif containing protein, putative (Suppl Table 7)	6.6	38	6.4	37	5	36	37	2.30769	86	2.30769	86	1.81481	76	82.6667	2.89474	74	2.89474	74	2.89474	74	2.89474	74	74	2.30769	86	2.94444	71	2.85	77	3.11111	74	3.05556	73	3.3125	69	2.94444	71	64.3016	2.625	29	45.6667	8.66667	18.3651	53.6667	31.5913
LTRL590_020006000.1	LtrL590_02:35,649..50,369(-)	4906	14721	phosphatidylinositol kinase related protein, putative (Suppl Table 7)	1.24444	101	1.2449	110	1.35556	106	105.667	0.906977	82	0.953488	84	0.972973	73	79.6667	1.36735	116	1.36735	116	1.36735	116	1.36735	116	116	0.953488	84	1.36735	116	1.36735	116	1.36735	116	1.36735	116	1.36735	116	1.36735	116	95.0525	1.1875	35	-26	-36.3333	-15.3858	44.6667	-8.26312
LTRL590_350027500.1	LtrL590_35:814,109..814,387(+)	92	279	Kinetoplastid membrane protein 11, putative (Suppl Table 7 - [21])	#DIV/0!	1	#DIV/0!	1	#DIV/0!	1	1	0	1	0	1	#DIV/0!	0	0.666667	#DIV/0!	1	#DIV/0!	1	#DIV/0!	1	#DIV/0!	1	1	0	1	#DIV/0!	1	#DIV/0!	1	#DIV/0!	1	#DIV/0!	1	#DIV/0!	1	#DIV/0!	1	#DIV/0!	#DIV/0!	1	-0.333333	-0.333333	#DIV/0!	-0.333333	#DIV/0!
LTRL590_350027600.1	LtrL590_35:819,034..819,312(+)	92	279	kinetoplastid membrane protein-11 (Suppl Table 7 - [21])	#DIV/0!	1	#DIV/0!	1	#DIV/0!	1	1	#DIV/0!	1	#DIV/0!	1	#DIV/0!	1	1	#DIV/0!	1	#DIV/0!	1	#DIV/0!	1	#DIV/0!	1	1	#DIV/0!	1	#DIV/0!	1	#DIV/0!	1	#DIV/0!	1	#DIV/0!	1	#DIV/0!	0	#DIV/0!	1	#DIV/0!	#DIV/0!	1	0	0	#DIV/0!	0	#DIV/0!
LTRL590_140018300.1	LtrL590_14:524,554..524,859(+)	102	306	Prefoldin subunit, putative (Suppl Table 7 - [21])	2	3	0.5	3	#DIV/0!	0	2	0.25	5	#DIV/0!	0	0.25	5	3.33333	#DIV/0!	0	0.333333	4	#DIV/0!	0	1	2	1.5	#DIV/0!	0	#DIV/0!	1	1	2	#DIV/0!	1	2	3	1.5	5	1	2	#DIV/0!	0.666667	10	1.33333	1.83333	#DIV/0!	-6.66667	#DIV/0!
LTRL590_300014800.1	LtrL590_30:283,187..283,855(+)	222	669	amastin-like surface protein-like protein	1.5	5	3	4	3	4	4.33333	#DIV/0!	1	#DIV/0!	1	#DIV/0!	1	1	3	4	3	4	3	4	3	4	4	#DIV/0!	1	3	4	3	4	3	4	3	4	3	4	3	4	3.42857	3	4	-3.33333	-3	-2.42857	-3	-2.94048
LTRL590_340015100.1	LtrL590_34:400,934..401,545(+)	203	612	amastin-like protein	1	2	1	2	1	2	2	1	4	1	4	#DIV/0!	2	3.33333	1	2	1	2	1	2	2	3	2.25	1	4	2	3	2	3	2	3	2	3	2	3	2	3	3	1	2	1.33333	1.08333	0.333333	1.33333	1.02083
LTRL590_340015200.1	LtrL590_34:408,206..408,787(+)	193	582	amastin-like protein	0.6	8	0.6	8	0.6	8	8	0.833333	11	0.666667	10	0.75	7	9.33333	0.6	8	0.6	8	0.6	8	0.5	9	8.25	0.666667	10	0.5	9	0.5	9	0.5	9	0.5	9	0.5	9	0.5	9	7.92857	0.4	7	1.33333	1.08333	1.40476	2.33333	1.53869
LTRL590_240018700.1	LtrL590_24:461,614..462,138(+)	174	525	amastin-like surface protein-like protein	4	5	2	6	2	6	5.66667	3.5	9	3.5	9	10	11	9.66667	2.5	7	2.5	7	2.5	7	2.5	7	7	3.5	9	2.5	7	2.5	7	2.5	7	2.5	7	2.5	7	2.5	7	6.64286	5	6	4	2.66667	3.02381	3.66667	3.33929
LTRL590_270010600.1	LtrL590_27:212,238..212,867(+)	209	630	Amastin surface glycoprotein, putative	#DIV/0!	0	1.5	5	0	1	2	1.5	5	1.5	5	5	6	5.33333	3	4	3	4	3	4	3	4	4	1.5	5	3	4	1.5	5	3	4	3	4	3	4	3	4	4.14286	#DIV/0!	3	3.33333	1.33333	1.19048	2.33333	2.04762
LTRL590_280017200.1	LtrL590_28:432,545..434,104(+)	519	1560	Amastin surface glycoprotein, putative	3	12	2.66667	11	3	12	11.6667	2.4	17	2.4	17	2.75	15	16.3333	2	12	2	12	2	12	0	1	9.25	2.4	17	2	12	2.25	13	2	12	2	12	2	12	2	12	11.4286	1.75	11	4.66667	7.08333	4.90476	5.33333	5.49702
LTRL590_240018600.1	LtrL590_24:454,990..455,508(+)	172	519	amastin-like surface protein-like protein	#DIV/0!	4	#DIV/0!	4	#DIV/0!	4	4	1	2	1	2	1	2	2	5	6	5	6	5	6	5	6	6	1	2	5	6	5	6	5	6	5	6	5	6	5	6	5.28571	#DIV/0!	3	-2	-4	-3.28571	-1	-2.57143
LTRL590_280020300.1	LtrL590_28:525,990..527,018(+)	342	1029	Amastin surface glycoprotein, putative	1	6	1	6	1	6	6	0.5	9	0.5	9	0.75	7	8.33333	1	6	1	6	1	6	#DIV/0!	0	4.5	0.5	9	1	6	1	6	1	6	1	6	1	6	1	6	5.71429	0	3	2.33333	3.83333	2.61905	5.33333	3.52976
LTRL590_240018800.1	LtrL590_24:469,017..469,577(+)	186	561	amastin-like surface protein-like protein	0.333333	4	0.333333	4	0.333333	4	4	0.333333	4	0.333333	4	2	3	3.66667	0.333333	4	0.333333	4	0.333333	4	0.333333	4	4	0.333333	4	0.333333	4	0.333333	4	0.333333	4	0.333333	4	#DIV/0!	0	0.333333	4	2.90476	#DIV/0!	1	-0.333333	-0.333333	0.761905	2.66667	0.690476
LTRL590_000023100.1	LTRL590_SCAF000112:101,891..103,147(+)	418	1257	Amastin surface glycoprotein, putative	2	3	2	3	2	3	3	0.5	6	0.5	6	0.5	6	6	0.5	3	0.5	3	0.5	3	0.5	3	3	0.5	6	0.75	7	0.75	7	0.75	7	0.75	7	0.75	7	0.75	7	5.96429	0.5	3	3	3	0.0357143	3	2.25893
LTRL590_280020400.1	LtrL590_28:530,505..532,127(+)	540	1623	amastin-like protein	8	9	5	12	10	11	10.6667	1.11111	19	1.11111	19	1.11111	19	19	2.75	15	2.75	15	2.75	15	0.666667	5	12.5	1.11111	19	2.75	15	2.75	15	2.75	15	2.75	15	2.75	15	2.75	15	13.8214	3.66667	14	8.33333	6.5	5.17857	5	6.25298
LTRL590_360052200.1	LtrL590_36:1,597,689..1,598,288(+)	199	600	Amastin surface glycoprotein, putative	0	3	0	3	0	2	2.66667	#DIV/0!	1	#DIV/0!	1	#DIV/0!	2	1.33333	0.5	6	0.5	6	0.5	6	0.5	6	6	#DIV/0!	1	0.5	6	0.5	6	0.5	6	0.5	6	0.5	6	0.5	6	4.5	0.5	6	-1.33333	-4.66667	-3.16667	-4.66667	-3.45833
LTRL590_240018300.1	LtrL590_24:447,058..447,618(+)	186	561	amastin-like surface protein-like protein	0.333333	4	0	3	0.333333	4	3.66667	0.5	3	0.75	7	#DIV/0!	1	3.66667	1	2	0.5	3	0.333333	4	0.5	3	3	0.75	7	0.333333	4	0.333333	4	0	3	0.333333	4	#DIV/0!	0	0.333333	4	3.28571	#DIV/0!	0	0	0.666667	0.380952	3.66667	1.17857
LTRL590_140010500.1	LtrL590_14:185,098..185,925(-)	275	828	Amastin surface glycoprotein, putative	5	6	5	6	5	6	6	4	5	4	5	5	6	5.33333	2.33333	10	2.33333	10	2.33333	10	2.33333	10	10	4	5	2.33333	10	2.33333	10	2.33333	10	2.33333	10	2.33333	10	2.33333	10	8.19048	2.5	7	-0.666667	-4.66667	-2.85714	-1.66667	-2.46429
LTRL590_340017400.1	LtrL590_34:475,040..475,546(-)	167	504	Amastin surface glycoprotein, putative	#DIV/0!	5	5	6	3	8	6.33333	3	12	4	15	2.66667	11	12.6667	5	6	2.33333	10	3	8	3.66667	14	9.5	4	15	6	7	7	8	3	12	5	6	6	7	4	10	8	#DIV/0!	3	6.33333	3.16667	4.66667	9.66667	5.95833
LTRL590_000023000.1	LTRL590_SCAF000112:97,289..98,764(+)	491	1476	Amastin surface glycoprotein, putative	1.2	11	1	12	1	12	11.6667	0.8	9	0.8	9	1.5	10	9.33333	0.25	5	0.25	5	0.25	5	0.25	5	5	0.8	9	0.875	15	0.875	15	0.875	15	0.875	15	0.875	15	0.875	15	12.125	0	3	-2.33333	4.33333	-2.79167	6.33333	1.38542
LTRL590_340016700.1	LtrL590_34:461,403..462,101(-)	232	699	amastin-like surface protein-like protein	2	3	2	3	2	3	3	6	14	5	12	13	14	13.3333	2	3	2	3	2	3	5.33333	19	7	5	12	5.33333	19	4.33333	16	3.33333	13	7	16	5.5	13	4.66667	17	13.7619	2	3	10.3333	6.33333	-0.428571	10.3333	6.64286
LTRL590_310009200.1	LtrL590_31:112,385..113,029(-)	214	645	amastin, putative	18	19	3.8	24	8	18	20.3333	5.25	25	5.33333	19	5.66667	20	21.3333	9	30	7.5	34	12.5	27	8.75	39	32.5	5.33333	19	6	35	7.25	33	5.8	34	7	24	9.5	21	8	27	23.5429	4	15	1	-11.1667	-2.20952	6.33333	-1.51071
LTRL590_300014600.1	LtrL590_30:277,745..277,936(+)	63	192	Amastin surface glycoprotein, putative	#DIV/0!	2	#DIV/0!	1	#DIV/0!	1	1.33333	#DIV/0!	0	#DIV/0!	0	#DIV/0!	0	0	#DIV/0!	0	#DIV/0!	0	#DIV/0!	0	#DIV/0!	0	0	#DIV/0!	0	#DIV/0!	0	#DIV/0!	0	#DIV/0!	0	#DIV/0!	0	#DIV/0!	0	#DIV/0!	0	#DIV/0!	#DIV/0!	0	-1.33333	0	#DIV/0!	0	#DIV/0!
LTRL590_360052100.1	LtrL590_36:1,593,085..1,593,798(+)	237	714	Amastin surface glycoprotein, putative	#DIV/0!	1	#DIV/0!	0	#DIV/0!	0	0.333333	1.5	5	1.5	5	#DIV/0!	6	5.33333	#DIV/0!	3	#DIV/0!	3	#DIV/0!	3	#DIV/0!	3	3	1.5	5	#DIV/0!	3	#DIV/0!	3	#DIV/0!	3	#DIV/0!	3	#DIV/0!	3	#DIV/0!	3	#DIV/0!	#DIV/0!	2	5	2.33333	#DIV/0!	3.33333	#DIV/0!
LTRL590_240028800.1	LtrL590_24:822,744..823,211(-)	155	468	ubiquitin-conjugating enzyme E2, putative	0	2	0	2	0	2	2	0	2	0	3	0	1	2	0	2	0	2	0	2	0	2	2	0	3	0	2	0	3	0	2	0	2	0	2	0	2	2	0	2	0	0	0	0	0
LTRL590_200006300.1	LtrL590_20:40,032..41,702(-)	556	1671	NADH-ubiquinone oxidoreductase complex I subunit, putative	0	2	0	1	0.5	3	2	0.333333	4	0.333333	4	1.5	5	4.33333	0	2	0	2	0	2	0	2	2	0.333333	4	0	2	0	2	0	2	0	2	0	2	0	2	2	0	2	2.33333	2.33333	2.33333	2.33333	2.33333
LTRL590_210021200.1	LtrL590_21:548,502..548,987(-)	161	486	hypothetical protein, conserved	0.5	3	0.5	3	0.5	3	3	0.25	5	0.25	5	0.333333	4	4.66667	0.5	3	0.5	3	0.5	3	0.5	3	3	0.25	5	0.5	3	0.5	3	0.5	3	0.5	3	0.5	3	0.5	3	2.92857	0.5	3	1.66667	1.66667	1.7381	1.66667	1.68452
LTRL590_350018400.1	LtrL590_35:481,132..481,434(+)	100	303	Core histone H2A/H2B/H3/H4, putative	0	1	0	1	0	1	1	#DIV/0!	1	#DIV/0!	1	#DIV/0!	1	1	0	1	0	1	0	1	0	1	1	#DIV/0!	1	0	1	0	1	0	1	0	1	0	1	0	1	0.857143	0	1	0	0	0.142857	0	0.0357143
LTRL590_350017500.1	LtrL590_35:460,874..461,638(+)	254	765	short chain dehydrogenase, putative	1	2	1	2	1	2	2	2	3	2	3	#DIV/0!	1	2.33333	1	2	1	2	1	2	1	2	2	2	3	1	2	1	2	1	2	1	2	1	2	1	2	2	1	2	0.333333	0.333333	0.333333	0.333333	0.333333
LTRL590_240022800.1	LtrL590_24:626,620..626,811(+)	63	192	hypothetical protein, conserved	0	1	0	1	0	1	1	0	2	0	2	0	1	1.66667	0	1	0	1	0	1	0	1	1	0	2	0	1	0	1	0	1	0	1	0	1	0	1	1	0	1	0.666667	0.666667	0.666667	0.666667	0.666667
LTRL590_310023700.1	LtrL590_31:757,842..758,033(-)	63	192	hypothetical protein	0	1	0	1	0	1	1	1	2	1	2	#DIV/0!	1	1.66667	0	1	0	1	0	1	0	1	1	1	2	0	1	0	1	0	1	0	1	0	1	0	1	1	0	1	0.666667	0.666667	0.666667	0.666667	0.666667
LTRL590_360046100.1	LtrL590_36:1,420,442..1,420,753(-)	103	312	EF-hand domain pair, putative	0	1	0	1	0	1	1	0	2	0	2	0	1	1.66667	0	1	0	1	0	1	0	1	1	0	2	0	1	0	1	0	1	0	1	0	1	0	1	1	0	1	0.666667	0.666667	0.666667	0.666667	0.666667
LTRL590_000020200.1	LTRL590_SCAF000110:997..1,804(+)	269	807	Metallo-beta-lactamase superfamily, putative	0	1	0	1	0	1	1	1	2	1	2	#DIV/0!	2	2	0	1	0	1	0	1	0	1	1	1	2	0	1	0	1	0	1	0	1	0	1	0	1	1	0	1	1	1	1	1	1
LTRL590_000027800.1	LTRL590_SCAF000120:4,732..5,115(-)	127	384	LisH domain-containing protein FOPNL, putative	0	1	0	1	0	1	1	0	2	0	2	0	2	2	0	1	0	1	0	1	0	1	1	0	2	0	1	0	1	0	1	0	1	0	1	0	1	1	0	1	1	1	1	1	1
LTRL590_030015200.1	LtrL590_03:383,947..384,261(-)	104	315	hypothetical protein, conserved	0	1	0	1	0	1	1	0	2	0	2	0	2	2	0	1	0	1	0	1	0	1	1	0	2	0	1	0	1	0	1	0	1	0	1	0	1	1	0	1	1	1	1	1	1
LTRL590_220018100.1	LtrL590_22:520,014..520,820(-)	268	807	mak-16-like RNA binding protein, putative	0	1	0	1	0	1	1	0	2	0	2	0	2	2	0	1	0	1	0	1	0	1	1	0	2	0	1	0	1	0	1	0	1	0	1	0	1	1	0	1	1	1	1	1	1
LTRL590_320045600.1	LtrL590_32:1,480,526..1,480,993(+)	155	468	hypothetical protein, conserved	0	2	0	2	0	2	2	0.5	3	0.5	3	2	3	3	0	2	0	2	0	2	0	2	2	0.5	3	0	2	0.5	3	0	2	0	2	0	2	0	2	2	0	2	1	1	1	1	1
LTRL590_350026800.1	LtrL590_35:790,255..791,895(+)	546	1641	hypothetical protein, conserved	2	6	2	6	2	6	6	2	9	2.33333	10	#DIV/0!	2	7	2	6	2	6	2	6	2	6	6	2.33333	10	2	6	2	6	2	6	2	6	2	6	2	6	6	2	6	1	1	1	1	1
LTRL590_360044500.1	LtrL590_36:1,363,953..1,364,555(-)	200	603	NIPSNAP, putative	0	1	0	1	0	1	1	1	2	1	2	1	2	2	0	1	0	1	0	1	0	1	1	1	2	0	1	0	1	0	1	0	1	0	1	0	1	1	0	1	1	1	1	1	1
LTRL590_360075000.1	LtrL590_36:2,440,758..2,441,294(-)	178	537	ADP-ribosylation factor-like protein 3b, putative	0	1	#DIV/0!	0	0	2	1	0	2	0	2	0	2	2	0	1	0	1	0	1	0	1	1	0	2	0	1	0	1	0	1	0	1	0	1	0	1	1	0	1	1	1	1	1	1
LTRL590_060018200.1	LtrL590_06:496,561..496,854(+)	97	294	Transcription factor e(y)2, putative	0	1	0	1	0	1	1	0	2	0	2	0	3	2.33333	0	1	0	1	0	1	0	1	1	0	2	0	1	0	1	0	1	0	1	0	1	0	1	1	0	1	1.33333	1.33333	1.33333	1.33333	1.33333
LTRL590_350033600.1	LtrL590_35:1,067,722..1,068,156(-)	144	435	hypothetical protein	1	4	1	4	1	4	4	2.5	7	2.5	7	1.5	5	6.33333	1	4	1	4	1	4	1	4	4	2.5	7	1	4	1	4	1	4	1	4	1	4	1	4	4	1	4	2.33333	2.33333	2.33333	2.33333	2.33333
LTRL590_340014400.1	LtrL590_34:376,011..376,568(+)	185	558	hypothetical protein	0.5	3	0.5	3	0.5	3	3	4	5	4	5	2	6	5.33333	0.5	3	0.5	3	0.5	3	0.5	3	3	4	5	0.5	3	0.5	3	0.5	3	0.5	3	0.5	3	0.5	3	2.92857	0.5	3	2.33333	2.33333	2.40476	2.33333	2.35119
LTRL590_020005300.1	LtrL590_02:11,358..11,927(-)	189	570	hypothetical protein, conserved	0.5	3	0.5	3	0.5	3	3	2	6	2	6	4	5	5.66667	0.5	3	0.5	3	0.5	3	0.5	3	3	2	6	0.5	3	0.5	3	0.5	3	0.5	3	0.5	3	0.5	3	3.07143	0.5	3	2.66667	2.66667	2.59524	2.66667	2.64881
LTRL590_360060900.1	LtrL590_36:1,942,041..1,942,868(-)	275	828	Uncharacterized protein family UPF0029, putative	0.5	3	0.5	3	0.5	3	3	1.5	5	1.5	5	0.6	8	6	0.5	3	0.5	3	0.5	3	0.5	3	3	1.5	5	0.5	3	1	4	0.5	3	0.5	3	0.5	3	0.5	3	3.07143	0.5	3	3	3	2.92857	3	2.98214
LTRL590_020005400.1	LtrL590_02:12,553..13,746(-)	397	1194	hypothetical protein, conserved	0.25	5	0.25	5	0.25	5	5	0.6	8	0.6	8	0.5	12	9.33333	0.25	5	0.25	5	0.25	5	0.25	5	5	0.6	8	0.25	5	0.2	6	0.25	5	0.25	5	0.25	5	0.25	5	4.89286	0.25	5	4.33333	4.33333	4.44048	4.33333	4.36012
LTRL590_240019300.1	LtrL590_24:481,694..482,101(+)	135	408	Transport protein particle (TRAPP) component, putative	1	2	1	2	1	2	2	0	2	0	2	0	1	1.66667	1	2	1	2	1	2	1	2	2	0	2	1	2	1	2	1	2	1	2	1	2	1	2	1.85714	1	2	-0.333333	-0.333333	-0.190476	-0.333333	-0.297619
LTRL590_360039500.1	LtrL590_36:1,239,279..1,239,737(-)	152	459	glutathione peroxidase, putative	1	2	1	2	1	2	2	0	2	0	2	0	1	1.66667	1	2	1	2	1	2	1	2	2	0	2	1	2	1	2	1	2	1	2	1	2	1	2	1.85714	1	2	-0.333333	-0.333333	-0.190476	-0.333333	-0.297619
LTRL590_040014200.1	LtrL590_04:361,200..361,646(-)	148	447	Cytochrome c oxidase biogenesis protein Cmc1 like, putative	0	1	0	1	0	1	1	0	1	0	1	0	2	1.33333	0	1	0	1	0	1	0	1	1	0	1	0	1	0	1	0	1	0	1	0	1	0	1	0.857143	0	1	0.333333	0.333333	0.47619	0.333333	0.369048
LTRL590_130021000.1	LtrL590_13:595,098..595,514(-)	138	417	ubiquitin-conjugating enzyme-like protein	0	1	0	1	0	1	1	0	1	0	1	1	2	1.33333	0	1	0	1	0	1	0	1	1	0	1	0	1	0	1	0	1	0	1	0	1	0	1	0.857143	0	1	0.333333	0.333333	0.47619	0.333333	0.369048
LTRL590_180021800.1	LtrL590_18:744,267..744,623(+)	118	357	hypothetical protein, conserved	0	1	0	1	0	1	1	0	1	0	1	1	2	1.33333	0	1	0	1	0	1	0	1	1	0	1	0	1	0	1	0	1	0	1	0	1	0	1	0.857143	0	1	0.333333	0.333333	0.47619	0.333333	0.369048
LTRL590_240028400.1	LtrL590_24:800,635..801,771(-)	378	1137	Kelch motif/Galactose oxidase, central domain containing protein, putative	0	1	0	1	0	1	1	0	1	0	1	1	2	1.33333	0	1	0	1	0	1	0	1	1	0	1	0	1	0	1	0	1	0	1	0	1	0	1	0.857143	0	1	0.333333	0.333333	0.47619	0.333333	0.369048
LTRL590_360039900.1	LtrL590_36:1,244,817..1,245,173(-)	118	357	pre-mRNA branch site protein p14, putative	0	1	0	1	0	1	1	0	1	0	1	0	2	1.33333	0	1	0	1	0	1	0	1	1	0	1	0	1	0	1	0	1	0	1	0	1	0	1	0.857143	0	1	0.333333	0.333333	0.47619	0.333333	0.369048
LTRL590_020005100.1	LtrL590_02:7,338..7,556(+)	72	219	hypothetical protein	1	2	1	2	1	2	2	#DIV/0!	2	#DIV/0!	2	#DIV/0!	3	2.33333	1	2	1	2	1	2	1	2	2	#DIV/0!	2	1	2	1	2	1	2	1	2	1	2	1	2	1.85714	1	2	0.333333	0.333333	0.47619	0.333333	0.369048
LTRL590_320025600.1	LtrL590_32:738,159..738,635(-)	158	477	hypothetical protein, conserved	1	2	1	2	1	2	2	0	2	0	2	2	3	2.33333	1	2	1	2	1	2	1	2	2	0	2	1	2	1	2	1	2	1	2	1	2	1	2	1.85714	1	2	0.333333	0.333333	0.47619	0.333333	0.369048
LTRL590_350019700.1	LtrL590_35:538,504..539,487(+)	327	984	hypothetical protein, conserved	2	3	2	3	2	3	3	0	5	0	5	0	1	3.66667	2	3	2	3	2	3	2	3	3	0	5	2	3	2	3	2	3	2	3	2	3	2	3	3.14286	2	3	0.666667	0.666667	0.52381	0.666667	0.630952
LTRL590_110005900.1	LtrL590_11:27,432..28,109(+)	225	678	RNA recognition motif. (a.k.a. RRM, RBD, or RNP domain), putative	0	2	0	2	0	2	2	0.5	3	0.5	3	0	3	3	0	2	0	2	0	2	0	2	2	0.5	3	0	2	0	2	0	2	0	2	0	2	0	2	1.85714	0	2	1	1	1.14286	1	1.03571
LTRL590_260018000.1	LtrL590_26:451,530..452,366(+)	278	837	hypothetical protein, conserved	0	2	0	2	0	2	2	0	3	0	3	2	3	3	0	2	0	2	0	2	0	2	2	0	3	0	2	0	2	0	2	0	2	0	2	0	2	1.85714	0	2	1	1	1.14286	1	1.03571
LTRL590_230020800.1	LtrL590_23:564,279..565,334(+)	351	1056	hypothetical protein, conserved	0	1	0	1	0	1	1	0	3	0	3	0	1	2.33333	0	1	0	1	0	1	0	1	1	0	3	0	1	0	1	0	1	0	1	0	1	0	1	1.14286	0	1	1.33333	1.33333	1.19048	1.33333	1.29762
LTRL590_270025300.1	LtrL590_27:822,377..822,598(+)	73	222	hypothetical protein	0	1	0	1	0	1	1	0.5	3	0.5	3	#DIV/0!	1	2.33333	0	1	0	1	0	1	0	1	1	0.5	3	0	1	0	1	0	1	0	1	0	1	0	1	1.14286	0	1	1.33333	1.33333	1.19048	1.33333	1.29762
LTRL590_000013600.1	LTRL590_SCAF000068:1..835(-)	278	834	hypothetical protein, conserved	0	2	0	2	0	2	2	0.333333	4	0.333333	4	2	3	3.66667	1	2	1	2	1	2	1	2	2	0.333333	4	1	2	1	2	1	2	1	2	1	2	1	2	2.14286	1	2	1.66667	1.66667	1.52381	1.66667	1.63095
LTRL590_210017400.1	LtrL590_21:410,587..411,015(+)	142	429	hypothetical protein, conserved	0	1	1	2	0.5	3	2	0.5	3	0.5	3	0.666667	5	3.66667	0	2	0	2	0	2	0	2	2	0.5	3	0	2	0	2	0	2	0	2	0	2	0	2	1.85714	0	2	1.66667	1.66667	1.80952	1.66667	1.70238
LTRL590_320010100.1	LtrL590_32:186,781..187,401(-)	206	621	Rtf2 RING-finger containing protein, putative	1	2	1	2	1	2	2	0.5	3	1	4	1	6	4.33333	1	2	1	2	1	2	1	2	2	1	4	1	2	1	2	1	2	1	2	1	2	1	2	2.14286	1	2	2.33333	2.33333	2.19048	2.33333	2.29762
LTRL590_040005400.1	LtrL590_04:15,434..15,655(+)	73	222	hypothetical protein, conserved	0	1	0	1	0	1	1	0	1	0	1	0	1	1	0	1	0	1	0	1	0	1	1	0	1	0	1	0	1	0	1	0	1	0	1	0	1	0.857143	0	1	0	0	0.142857	0	0.0357143
LTRL590_080005400.1	LtrL590_08:13,949..14,176(+)	75	228	hypothetical protein, conserved	0	1	0	1	0	1	1	0	1	0	1	0	1	1	0	1	0	1	0	1	0	1	1	0	1	0	1	0	1	0	1	0	1	0	1	0	1	0.857143	0	1	0	0	0.142857	0	0.0357143
LTRL590_090018000.1	LtrL590_09:450,937..451,395(-)	152	459	mitochondrial import inner membrane translocase subunit TIM17, putative	#DIV/0!	1	#DIV/0!	1	#DIV/0!	1	1	0	1	0	1	0	1	1	0	1	0	1	0	1	0	1	1	0	1	0	1	0	1	0	1	0	1	0	1	0	1	0.857143	0	1	0	0	0.142857	0	0.0357143
LTRL590_220014700.1	LtrL590_22:377,339..377,650(+)	103	312	small nuclear ribonucleoprotein, putative	0	1	0	1	0	1	1	0	1	0	1	0	1	1	0	1	0	1	0	1	0	1	1	0	1	0	1	0	1	0	1	0	1	0	1	0	1	0.857143	0	1	0	0	0.142857	0	0.0357143
LTRL590_260028600.1	LtrL590_26:894,198..894,557(+)	119	360	hypothetical protein, conserved	0	1	0	1	0	1	1	0	1	0	1	0	1	1	0	1	0	1	0	1	0	1	1	0	1	0	1	0	1	0	1	0	1	0	1	0	1	0.857143	0	1	0	0	0.142857	0	0.0357143
LTRL590_270006900.1	LtrL590_27:44,157..44,696(-)	179	540	hypothetical protein, conserved	0	1	0	1	0	1	1	0	1	0	1	0	1	1	0	1	0	1	0	1	0	1	1	0	1	0	1	0	1	0	1	0	1	0	1	0	1	0.857143	0	1	0	0	0.142857	0	0.0357143
LTRL590_270022500.1	LtrL590_27:695,201..695,842(+)	213	642	eukaryotic translation initiation factor eIF-4E, putative	0	1	0	1	0	1	1	0	1	0	1	#DIV/0!	1	1	0	1	0	1	0	1	0	1	1	0	1	0	1	0	1	0	1	0	1	0	1	0	1	0.857143	0	1	0	0	0.142857	0	0.0357143
LTRL590_320041800.1	LtrL590_32:1,355,573..1,355,917(+)	114	345	hypothetical protein, conserved	0	1	0	1	0	1	1	0	1	0	1	0	1	1	0	1	0	1	0	1	0	1	1	0	1	0	1	0	1	0	1	0	1	0	1	0	1	0.857143	0	1	0	0	0.142857	0	0.0357143
LTRL590_340014800.1	LtrL590_34:386,069..386,392(+)	107	324	hypothetical protein, conserved	0	1	0	1	0	1	1	0	1	0	1	0	1	1	0	1	0	1	0	1	0	1	1	0	1	0	1	0	1	0	1	0	1	0	1	0	1	0.857143	0	1	0	0	0.142857	0	0.0357143
LTRL590_350024300.1	LtrL590_35:693,214..693,531(+)	105	318	Ribosomal protein L36e, putative	0	1	0	1	0	1	1	#DIV/0!	1	#DIV/0!	1	#DIV/0!	1	1	0	1	0	1	0	1	0	1	1	#DIV/0!	1	0	1	0	1	0	1	0	1	0	1	0	1	0.857143	0	1	0	0	0.142857	0	0.0357143
LTRL590_360024500.1	LtrL590_36:713,424..713,744(-)	106	321	hypothetical protein, conserved	0	1	0	1	0	1	1	#DIV/0!	1	#DIV/0!	1	#DIV/0!	1	1	0	1	0	1	0	1	0	1	1	#DIV/0!	1	0	1	0	1	0	1	0	1	0	1	0	1	0.857143	0	1	0	0	0.142857	0	0.0357143
LTRL590_360043100.1	LtrL590_36:1,328,778..1,329,242(-)	154	465	hypothetical protein, conserved	0	1	0	1	0	1	1	0	1	0	1	0	1	1	0	1	0	1	0	1	0	1	1	0	1	0	1	0	1	0	1	0	1	0	1	0	1	0.857143	0	1	0	0	0.142857	0	0.0357143
LTRL590_180015200.1	LtrL590_18:420,067..420,642(+)	191	576	hypothetical protein, conserved	0	1	0	1	0	1	1	0	1	0	1	0	3	1.66667	0	1	0	1	0	1	0	1	1	0	1	0	1	0	1	0	1	0	1	0	1	0	1	0.857143	0	1	0.666667	0.666667	0.809524	0.666667	0.702381
LTRL590_150010900.1	LtrL590_15:221,246..222,244(+)	332	999	hypothetical protein, conserved	4	5	4	5	4	5	5	4	5	4	5	2.5	7	5.66667	4	5	4	5	4	5	4	5	5	4	5	4	5	4	5	4	5	4	5	4	5	4	5	4.85714	4	5	0.666667	0.666667	0.809524	0.666667	0.702381
LTRL590_120006000.1	LtrL590_12:16,071..16,688(+)	205	618	kinetoplastid kinetochore protein 6, putative	0.5	3	0.5	3	0.5	3	3	0.333333	4	0.333333	4	0	1	3	0.5	3	0.5	3	0.5	3	0.5	3	3	0.333333	4	0.5	3	0.5	3	0.5	3	0.5	3	0.5	3	0.5	3	2.78571	0.5	3	0	0	0.214286	0	0.0535714
LTRL590_350032000.1	LtrL590_35:994,442..995,245(-)	267	804	hypothetical protein, conserved	0.5	3	0.5	3	0.5	3	3	0.5	3	0.5	3	#DIV/0!	2	2.66667	0.5	3	0.5	3	0.5	3	0.5	3	3	0.5	3	0.5	3	0.333333	4	0.5	3	0.5	3	0.5	3	0.5	3	2.78571	0.5	3	-0.333333	-0.333333	-0.119048	-0.333333	-0.279762
LTRL590_240029900.1	LtrL590_24:855,594..856,121(-)	175	528	hypothetical protein, conserved	0.5	3	0.5	3	0.5	3	3	0.333333	4	0.333333	4	0	2	3.33333	0.5	3	0.5	3	0.5	3	0.5	3	3	0.333333	4	0.5	3	0.5	3	0.5	3	0.5	3	0.5	3	0.5	3	2.78571	0.5	3	0.333333	0.333333	0.547619	0.333333	0.386905
LTRL590_150013400.1	LtrL590_15:310,382..310,561(+)	59	180	hypothetical protein	0.5	3	0.5	3	0.5	3	3	1	4	1	4	0.5	3	3.66667	0.5	3	0.5	3	0.5	3	0.5	3	3	1	4	0.5	3	0.5	3	0.5	3	0.5	3	0.5	3	0.5	3	2.78571	0.5	3	0.666667	0.666667	0.880952	0.666667	0.720238
LTRL590_340024800.1	LtrL590_34:767,774..768,244(-)	156	471	hypothetical protein, conserved	0.5	3	0.5	3	0.5	3	3	0.333333	4	0.333333	4	0.5	3	3.66667	0.5	3	0.5	3	0.5	3	0.5	3	3	0.333333	4	0.5	3	0.5	3	0.5	3	0.5	3	0.5	3	0.5	3	2.78571	0.5	3	0.666667	0.666667	0.880952	0.666667	0.720238
LTRL590_340031800.1	LtrL590_34:1,040,980..1,041,747(+)	255	768	RNA recognition motif. (a.k.a. RRM, RBD, or RNP domain), putative	0	3	0	3	0	3	3	0	2	0	2	0	2	2	0	3	0	3	0	3	0	4	3.25	0	2	0	4	0	4	0	4	0	4	0	4	0	4	3.14286	0	3	-1	-1.25	-1.14286	-1	-1.09821
LTRL590_000021200.1	LTRL590_SCAF000112:27,254..27,688(+)	144	435	ribosomal protein l35a, putative	0	1	0	1	0	1	1	0	1	0	1	#DIV/0!	0	0.666667	0	1	0	1	0	1	#DIV/0!	0	0.75	0	1	0	1	0	1	0	1	0	1	0	1	0	1	0.857143	0	1	-0.333333	-0.0833333	-0.190476	-0.333333	-0.235119
LTRL590_260006400.1	LtrL590_26:39,220..39,705(-)	161	486	hypothetical protein, conserved	2	3	2	3	2	3	3	0.5	3	0.5	3	1	6	4	2	3	2	3	2	3	1	2	2.75	0.5	3	2	3	2	3	2	3	2	3	2	3	2	3	2.85714	2	3	1	1.25	1.14286	1	1.09821
LTRL590_280038100.1	LtrL590_28:1,188,132..1,188,578(-)	148	447	glucosamine 6-phosphate n-acetyltransferase, putative	0	1	0	1	0	1	1	0	2	0	2	0	2	2	0	1	0	1	0	1	#DIV/0!	0	0.75	0	2	0	1	0	1	0	1	0	1	0	1	0	1	1	0	1	1	1.25	1	1	1.0625
LTRL590_270007200.1	LtrL590_27:49,175..50,044(-)	289	870	VIT family, putative	2	3	0	1	1	2	2	0.5	3	0.5	3	0.333333	4	3.33333	1	2	0	1	1	2	1	2	1.75	0.5	3	1	2	1	2	1	2	1	2	1	2	1	2	2	1	2	1.33333	1.58333	1.33333	1.33333	1.39583
LTRL590_280011200.1	LtrL590_28:220,406..220,693(-)	95	288	hypothetical protein, conserved	0	1	0	1	0	1	1	1	2	1	2	0.5	3	2.33333	0	1	0	1	0	1	#DIV/0!	0	0.75	1	2	0	1	0	1	0	1	0	1	0	1	0	1	1	0	1	1.33333	1.58333	1.33333	1.33333	1.39583
LTRL590_210005100.1	LtrL590_21:3,170..3,367(+)	65	198	hypothetical protein	4	5	5	6	3	4	5	1.33333	7	1.33333	7	2.5	7	7	1.5	5	1.5	5	1.5	5	2	6	5.25	1.33333	7	2	6	1.5	5	2	6	1.5	5	1.5	5	1.5	5	5	1.5	5	2	1.75	2	2	1.9375
LTRL590_030007300.1	LtrL590_03:61,870..62,121(+)	83	252	ribosomal protein L38, putative	0	1	0	1	0	1	1	#DIV/0!	0	#DIV/0!	0	#DIV/0!	0	0	0	1	0	1	0	1	0	1	1	#DIV/0!	0	0	1	0	1	0	1	0	1	0	1	0	1	0.714286	0	1	-1	-1	-0.714286	-1	-0.928571
LTRL590_220018600.1	LtrL590_22:533,619..533,954(-)	111	336	fk506-binding protein 1-like protein	0	1	0	1	0	1	1	#DIV/0!	0	#DIV/0!	0	#DIV/0!	0	0	0	1	0	1	0	1	0	1	1	#DIV/0!	0	0	1	0	1	0	1	0	1	0	1	0	1	0.714286	0	1	-1	-1	-0.714286	-1	-0.928571
LTRL590_340027200.1	LtrL590_34:855,377..855,775(-)	132	399	hypothetical protein, conserved	0	1	0	1	0	1	1	#DIV/0!	0	#DIV/0!	0	#DIV/0!	0	0	0	1	0	1	0	1	0	1	1	#DIV/0!	0	0	1	0	1	0	1	0	1	0	1	0	1	0.714286	0	1	-1	-1	-0.714286	-1	-0.928571
LTRL590_350007200.1	LtrL590_35:57,504..57,725(+)	73	222	Protein of unknown function (DUF1242), putative	0	1	0	1	0	1	1	#DIV/0!	0	#DIV/0!	0	#DIV/0!	0	0	0	1	0	1	0	1	0	1	1	#DIV/0!	0	0	1	0	1	0	1	0	1	0	1	0	1	0.714286	0	1	-1	-1	-0.714286	-1	-0.928571
LTRL590_350018300.1	LtrL590_35:478,217..478,663(+)	148	447	ubiquitin-conjugating enzyme E2, putative	0	1	0	1	0	1	1	#DIV/0!	0	#DIV/0!	0	#DIV/0!	0	0	0	1	0	1	0	1	0	1	1	#DIV/0!	0	0	1	0	1	0	1	0	1	0	1	0	1	0.714286	0	1	-1	-1	-0.714286	-1	-0.928571
LTRL590_150014300.1	LtrL590_15:361,051..361,389(-)	112	339	Dolichol phosphate-mannose biosynthesis regulatory protein (DPM2), putative	0	1	0	1	0	1	1	#DIV/0!	0	#DIV/0!	0	0	1	0.333333	0	1	0	1	0	1	0	1	1	#DIV/0!	0	0	1	0	1	0	1	0	1	0	1	0	1	0.714286	0	1	-0.666667	-0.666667	-0.380952	-0.666667	-0.595238
LTRL590_030007800.1	LtrL590_03:75,768..76,028(+)	86	261	Cytochrome b5-like Heme/Steroid binding domain containing protein, putative	2	3	2	3	2	3	3	1	2	1	2	#DIV/0!	1	1.66667	2	3	2	3	2	3	2	3	3	1	2	2	3	2	3	2	3	2	3	2	3	2	3	2.71429	2	3	-1.33333	-1.33333	-1.04762	-1.33333	-1.2619
LTRL590_240023100.1	LtrL590_24:632,239..632,622(+)	127	384	hypothetical protein	2	3	2	3	2	3	3	#DIV/0!	2	#DIV/0!	2	#DIV/0!	1	1.66667	2	3	2	3	2	3	2	3	3	#DIV/0!	2	2	3	2	3	2	3	2	3	2	3	2	3	2.71429	2	3	-1.33333	-1.33333	-1.04762	-1.33333	-1.2619
LTRL590_150018200.1	LtrL590_15:497,823..498,338(-)	171	516	E2-like ubiquitin-conjugation enzyme, putative	0	3	0	3	0	3	3	0	4	0	4	0	1	3	0	3	0	3	0	3	0	3	3	0	4	0	3	0	3	0	3	0	3	0	3	0	3	2.71429	0	3	0	0	0.285714	0	0.0714286
LTRL590_350027400.1	LtrL590_35:806,803..807,627(+)	274	825	RNA-binding protein, putative	0	2	0	2	0	2	2	0	2	0	2	0.5	3	2.33333	0	2	0	2	0	2	0	2	2	0	2	0	2	0	2	0	2	0	2	0	2	0	2	1.71429	0	2	0.333333	0.333333	0.619048	0.333333	0.404762
LTRL590_080013500.1	LtrL590_08:333,732..333,920(-)	62	189	hypothetical protein	0	2	0	2	0	2	2	0	2	0	2	1	2	2	0	2	0	2	0	2	0	2	2	0	2	0	2	0	2	0	2	0	2	0	2	0	2	1.71429	0	2	0	0	0.285714	0	0.0714286
LTRL590_160022400.1	LtrL590_16:658,595..658,819(-)	74	225	hypothetical protein, conserved	1	2	1	2	1	2	2	#DIV/0!	2	#DIV/0!	2	#DIV/0!	2	2	1	2	1	2	1	2	1	2	2	#DIV/0!	2	1	2	1	2	1	2	1	2	0	1	1	2	1.71429	1	2	0	0	0.285714	0	0.0714286
LTRL590_350006600.1	LtrL590_35:37,819..38,691(-)	290	873	hypothetical protein, conserved	0	2	0	2	0	2	2	0	2	0	2	1	2	2	0	2	0	2	0	2	0	2	2	0	2	0	2	0	2	0	2	0	2	0	2	0	2	1.71429	0	2	0	0	0.285714	0	0.0714286
LTRL590_130016300.1	LtrL590_13:402,036..402,599(-)	187	564	hypothetical protein, conserved	0	2	0	2	0	2	2	0	2	0	2	0	1	1.66667	0	2	0	2	0	2	0	2	2	0	2	0	2	0	2	0	2	0	2	0	2	0	2	1.71429	0	2	-0.333333	-0.333333	-0.047619	-0.333333	-0.261905
LTRL590_360043400.1	LtrL590_36:1,341,825..1,342,412(-)	195	588	hypothetical protein, conserved	0	2	0	2	0	2	2	0	2	0	2	0	1	1.66667	0	2	0	2	0	2	0	2	2	0	2	0	2	0	2	0	2	0	2	0	2	0	2	1.71429	0	2	-0.333333	-0.333333	-0.047619	-0.333333	-0.261905
LTRL590_320021500.1	LtrL590_32:596,897..597,469(-)	190	573	rRNA processing, putative	1	2	1	2	1	2	2	#DIV/0!	1	#DIV/0!	1	#DIV/0!	0	0.666667	1	2	1	2	1	2	1	2	2	#DIV/0!	1	1	2	1	2	1	2	1	2	1	2	1	2	1.71429	1	2	-1.33333	-1.33333	-1.04762	-1.33333	-1.2619
LTRL590_360057300.1	LtrL590_36:1,817,720..1,818,199(+)	159	480	Predicted membrane protein, putative	0	1	0	1	0	1	1	0.333333	4	0.333333	4	0.5	3	3.66667	0	1	0	1	0	1	0	1	1	0.333333	4	0	1	0	1	0	1	0	1	0	1	0	1	1.28571	0	1	2.66667	2.66667	2.38095	2.66667	2.59524
LTRL590_350031300.1	LtrL590_35:983,813..984,112(+)	99	300	hypothetical protein	2	3	2	3	2	3	3	#DIV/0!	2	#DIV/0!	2	1	2	2	2	3	2	3	2	3	2	3	3	#DIV/0!	2	2	3	2	3	2	3	2	3	2	3	2	3	2.71429	2	3	-1	-1	-0.714286	-1	-0.928571
LTRL590_340026300.1	LtrL590_34:822,334..822,807(-)	157	474	hypothetical protein, conserved	0	4	0	3	0	3	3.33333	0	2	0	2	0	2	2	0	3	0	3	0	3	0	4	3.25	0	2	0	4	0	4	0	4	0	4	0	4	0	4	3.14286	0	3	-1.33333	-1.25	-1.14286	-1	-1.18155
LTRL590_340027500.1	LtrL590_34:862,159..862,779(-)	206	621	hypothetical protein, conserved	2	3	3	4	2	3	3.33333	1	2	1	2	1	2	2	2	3	2	3	2	3	1	4	3.25	1	2	1	4	1	4	1	4	1	4	1	4	1	4	3.28571	2	3	-1.33333	-1.25	-1.28571	-1	-1.21726
LTRL590_270006200.1	LtrL590_27:28,306..28,563(-)	85	258	hypothetical protein, conserved	0	1	0	1	0	1	1	#DIV/0!	0	#DIV/0!	0	0	2	0.666667	0	1	0	1	0	1	#DIV/0!	0	0.75	#DIV/0!	0	0	1	0	1	0	1	0	1	0	1	0	1	0.714286	0	1	-0.333333	-0.0833333	-0.047619	-0.333333	-0.199405
LTRL590_300005400.1	LtrL590_30:9,975..10,691(-)	238	717	hypothetical protein, conserved	0	1	0	3	0	1	1.66667	0	3	0	3	0.5	3	3	0	2	0	2	0	2	0	2	2	0	3	0	2	0	2	0	2	0	2	0	2	0	2	1.85714	0	2	1.33333	1	1.14286	1	1.11905
LTRL590_290034200.1	LtrL590_29:1,175,646..1,176,014(+)	122	369	hypothetical protein, conserved	0	1	#DIV/0!	0	0	1	0.666667	0	1	0	1	0	2	1.33333	0	1	0	1	0	1	0	1	1	0	1	0	1	0	1	0	1	0	1	0	1	0	1	0.857143	0	1	0.666667	0.333333	0.47619	0.333333	0.452381
LTRL590_280034700.1	LtrL590_28:1,087,970..1,088,830(-)	286	861	hypothetical protein, conserved	0.5	3	1	4	0.5	3	3.33333	0	1	0	1	0	3	1.66667	1	4	1	4	1	4	#DIV/0!	0	3	0	1	1	4	1	4	1	4	1	4	1	4	1	4	3.14286	0.5	3	-1.66667	-1.33333	-1.47619	-1.33333	-1.45238
LTRL590_060005400.1	LtrL590_06:15,815..16,069(-)	84	255	hypothetical protein	1	4	1	2	1	2	2.66667	#DIV/0!	3	#DIV/0!	3	#DIV/0!	1	2.33333	2	3	2	3	2	3	2	3	3	#DIV/0!	3	2	3	2	3	2	3	2	3	2	3	2	3	2.85714	2	3	-0.333333	-0.666667	-0.52381	-0.666667	-0.547619
LTRL590_270028900.1	LtrL590_27:964,118..965,248(-)	376	1131	hypothetical protein, conserved	2	3	2	3	3	4	3.33333	1.5	5	1.5	5	1	2	4	2	3	2	3	2	3	2	3	3	1.5	5	2	3	2	3	2	3	2	3	2	3	2	3	3.14286	2	3	0.666667	1	0.857143	1	0.880952
LTRL590_350035600.1	LtrL590_35:1,136,126..1,136,413(-)	95	288	hypothetical protein	2	3	3	4	2	3	3.33333	#DIV/0!	5	#DIV/0!	5	#DIV/0!	2	4	2	3	2	3	2	3	2	3	3	#DIV/0!	5	2	3	2	3	2	3	2	3	2	3	2	3	3.14286	2	3	0.666667	1	0.857143	1	0.880952
LTRL590_120005300.1	LtrL590_12:5,117..5,968(+)	283	852	proteasome beta-1 subunit, putative	3	4	1	2	1	2	2.66667	0	5	0	5	0	1	3.66667	0.5	3	0.5	3	0.5	3	0.5	3	3	0	5	0.5	3	0.5	3	0.5	3	0.5	3	0.5	3	0.5	3	2.92857	0.5	3	1	0.666667	0.738095	0.666667	0.767857
LTRL590_350014400.1	LtrL590_35:331,863..332,594(+)	243	732	hypothetical protein, conserved	1	6	1.5	5	1.5	5	5.33333	1.25	9	1.25	9	2.5	7	8.33333	1.5	5	1.5	5	1.5	5	1.5	5	5	1.25	9	1.5	5	1.5	5	1.5	5	1.5	5	1.5	5	1.5	5	5.07143	1.5	5	3	3.33333	3.2619	3.33333	3.23214
LTRL590_000021500.1	LTRL590_SCAF000112:37,756..38,943(+)	395	1188	WD-repeat containing protein	0	1	0	1	0	1	1	2	3	2	3	#DIV/0!	1	2.33333	0	1	0	1	0	1	#DIV/0!	0	0.75	2	3	0	1	0	1	0	1	0	1	0	1	0	1	1.14286	0	1	1.33333	1.58333	1.19048	1.33333	1.36012
LTRL590_230015500.1	LtrL590_23:341,179..341,520(-)	113	342	Cytochrome C oxidase copper chaperone (COX17), putative	0	1	0	1	0	1	1	0	3	0	3	0	1	2.33333	0	1	0	1	0	1	#DIV/0!	0	0.75	0	3	0	1	0	1	0	1	0	1	0	1	0	1	1.14286	0	1	1.33333	1.58333	1.19048	1.33333	1.36012
LTRL590_230023600.1	LtrL590_23:677,039..677,680(+)	213	642	Ran-binding protein, putative	0	1	0	1	1	2	1.33333	0	2	0	2	1	2	2	0	1	0	1	0	1	0	1	1	0	2	0	1	0	1	0	1	0	1	0	1	0	1	1	0	1	0.666667	1	1	1	0.916667
LTRL590_360050300.1	LtrL590_36:1,538,337..1,538,558(+)	73	222	hypothetical protein	3	4	2	3	2	3	3.33333	3	4	3	4	2	3	3.66667	2	3	2	3	2	3	2	3	3	3	4	2	3	2	3	2	3	2	3	2	3	2	3	3	2	3	0.333333	0.666667	0.666667	0.666667	0.583333
LTRL590_210009300.1	LtrL590_21:119,072..119,719(+)	215	648	Protein of unknown function (DUF667), putative	0	1	0	2	0	1	1.33333	0	2	0	2	#DIV/0!	0	1.33333	0	1	0	1	0	1	0	1	1	0	2	0	1	0	1	0	1	0	1	0	1	0	1	1	0	1	0	0.333333	0.333333	0.333333	0.25
LTRL590_200005800.1	LtrL590_20:23,723..25,450(-)	575	1728	hypothetical protein, conserved	0	2	0	3	0	2	2.33333	0	4	0	4	0.25	5	4.33333	0	2	0	2	0	2	0	2	2	0	4	0	2	0	2	0	2	0	2	0	2	0	2	2	0	2	2	2.33333	2.33333	2.33333	2.25
LTRL590_070017500.1	LtrL590_07:571,804..572,166(+)	120	363	RNA binding protein, putative	0	1	#DIV/0!	0	0	1	0.666667	0	3	0	3	0	2	2.66667	0	1	0	1	0	1	0	1	1	0	3	0	1	#DIV/0!	0	0	1	0	1	0	1	0	1	1	0	1	2	1.66667	1.66667	1.66667	1.75
LTRL590_350030100.1	LtrL590_35:948,837..949,856(+)	339	1020	Nop53 (60S ribosomal biogenesis), putative	1	2	1	2	2	3	2.33333	2	3	2	3	#DIV/0!	3	3	1	2	1	2	1	2	1	2	2	2	3	1	2	1	2	1	2	1	2	1	2	1	2	2	1	2	0.666667	1	1	1	0.916667
LTRL590_290024700.1	LtrL590_29:841,990..842,382(-)	130	393	40S ribosomal protein S15A, putative	0	1	#DIV/0!	0	0	1	0.666667	0	2	0	2	0	1	1.66667	0	1	0	1	0	1	0	1	1	0	2	0	1	0	1	0	1	0	1	0	1	0	1	1	0	1	1	0.666667	0.666667	0.666667	0.75
LTRL590_200018700.1	LtrL590_20:569,992..570,561(+)	189	570	Domain of unknown function (DUF1935), putative	0	1	0	1	0	2	1.33333	0	2	0	2	0.5	3	2.33333	0	1	0	1	0	1	0	1	1	0	2	0	1	0	1	0	1	0	1	0	1	0	1	1	0	1	1	1.33333	1.33333	1.33333	1.25
LTRL590_330022800.1	LtrL590_33:643,651..644,313(+)	220	663	elongation factor 1-gamma, putative	0	1	0	2	0	1	1.33333	0	2	0	2	0.5	3	2.33333	0	1	0	1	0	1	0	1	1	0	2	0	1	0	1	0	1	0	1	0	1	0	1	1	0	1	1	1.33333	1.33333	1.33333	1.25
LTRL590_270014400.1	LtrL590_27:354,816..355,319(+)	167	504	hypothetical protein, conserved	0.5	3	0	4	0.333333	4	3.66667	1	6	1	6	3	4	5.33333	0.333333	4	0.333333	4	0.333333	4	0.333333	4	4	1	6	0.333333	4	0.333333	4	0.333333	4	0.333333	4	0.333333	4	0.333333	4	3.7619	0.333333	4	1.66667	1.33333	1.57143	1.33333	1.47619
LTRL590_050006200.1	LtrL590_05:36,765..38,063(+)	432	1299	protein kinase, putative	0	1	0	2	0	2	1.66667	0	4	0	4	0.5	3	3.66667	0	2	0	2	0	2	0	1	1.75	0	4	0	2	0	2	0	2	0	2	0	2	0	2	2	0	2	2	1.91667	1.66667	1.66667	1.8125
LTRL590_220018900.1	LtrL590_22:547,033..547,656(-)	207	624	i/6 autoantigen-like protein	1.5	5	1.5	5	1.5	5	5	5	6	5	6	2.33333	10	7.33333	1.5	5	1.5	5	1.5	5	1.5	5	5	5	6	1.5	5	1.5	5	1.5	5	1.5	5	1.5	5	1.5	5	4.64286	1.5	5	2.33333	2.33333	2.69048	2.33333	2.42262
LTRL590_350013800.1	LtrL590_35:313,231..313,728(+)	165	498	hypothetical protein, conserved	0.5	3	0.5	3	0.5	3	3	0.5	3	0.5	3	1.5	5	3.66667	0.5	3	0.5	3	0.5	3	0.5	3	3	0.5	3	0.5	3	0.5	3	0.5	3	0.5	3	0.5	3	0.5	3	2.64286	0.5	3	0.666667	0.666667	1.02381	0.666667	0.755952
LTRL590_350026900.1	LtrL590_35:792,623..793,945(+)	440	1323	short chain dehydrogenase, putative	0.5	3	0.5	3	0.5	3	3	0	3	0	3	0	2	2.66667	0.5	3	0.5	3	0.5	3	0.5	3	3	0	3	0.5	3	0.5	3	0.5	3	0.5	3	0.5	3	0.5	3	2.64286	0.5	3	-0.333333	-0.333333	0.0238095	-0.333333	-0.244048
LTRL590_140010200.1	LtrL590_14:168,468..169,445(+)	325	978	N-terminal conserved domain of Nudc./CS domain containing protein, putative	0.5	3	0.5	3	0.5	3	3	1	8	1	8	1	2	6	0.5	3	0.5	3	0.5	3	0.5	3	3	1	8	0.5	3	0.5	3	0.5	3	0.5	3	0.5	3	0.5	3	3.35714	0	3	3	3	2.64286	3	2.91071
LTRL590_360050600.1	LtrL590_36:1,544,652..1,545,314(+)	220	663	hs1vu complex proteolytic subunit-like, threonine peptidase, Clan T(1), family T1B	1	2	0	1	1	2	1.66667	0	2	0	2	0	2	2	0	2	0	2	0	2	0	2	2	0	2	0	2	0	2	0	2	0	2	0	2	0	2	1.71429	0	2	0.333333	0	0.285714	0	0.154762
LTRL590_210016900.1	LtrL590_21:390,048..391,052(+)	334	1005	hypothetical protein, conserved	0.5	3	0.5	3	0.666667	5	3.66667	4	5	4	5	0.75	7	5.66667	1	4	1	4	1	4	1	4	4	4	5	1	4	1	4	1	4	1	4	1	4	1	4	3.71429	1	4	2	1.66667	1.95238	1.66667	1.82143
LTRL590_350023100.1	LtrL590_35:646,302..646,937(+)	211	636	hypothetical protein, conserved	#DIV/0!	0	0	1	#DIV/0!	1	0.666667	#DIV/0!	0	#DIV/0!	0	#DIV/0!	0	0	0	1	0	1	0	1	0	1	1	#DIV/0!	0	0	1	0	1	0	1	0	1	0	1	0	1	0.714286	0	1	-0.666667	-1	-0.714286	-1	-0.845238
LTRL590_270016800.1	LtrL590_27:475,166..475,759(-)	197	594	Emopamil binding protein, putative	1.5	5	1.5	5	2	6	5.33333	1	8	1	8	1.25	9	8.33333	1.5	5	1.5	5	1.5	5	1.5	5	5	1	8	1.5	5	1.5	5	1.5	5	1.5	5	1.5	5	1.5	5	4.92857	1.5	5	3	3.33333	3.40476	3.33333	3.26786
LTRL590_080014700.1	LtrL590_08:386,266..387,381(+)	371	1116	phosphoribosylpyrophosphate synthetase	0.5	3	0.333333	4	0.5	3	3.33333	0.333333	4	0.333333	4	0	1	3	0.5	3	0.5	3	0.5	3	0.5	3	3	0.333333	4	0.5	3	1	4	0.5	3	0.5	3	0.5	3	0.5	3	2.92857	0.5	3	-0.333333	0	0.0714286	0	-0.0654762
LTRL590_220018500.1	LtrL590_22:531,739..532,623(-)	294	885	aquaporin, putative	0.333333	4	0.333333	4	0.333333	4	4	0.25	5	0.25	5	1	2	4	0.333333	4	0.333333	4	0.333333	4	0.333333	4	4	0.25	5	0.333333	4	0.333333	4	0.333333	4	0.333333	4	0.333333	4	0.333333	4	3.61905	0.333333	4	0	0	0.380952	0	0.0952381
LTRL590_260011600.1	LtrL590_26:188,548..189,300(-)	250	753	Qc-SNARE protein, putative	0	3	0	3	0	2	2.66667	0.5	6	0.5	6	0.4	7	6.33333	0.5	3	0.5	3	0.5	3	1	2	2.75	0.5	6	0.5	3	0.5	3	0.5	3	0.5	3	0.5	3	0.5	3	3.07143	0.5	3	3.66667	3.58333	3.2619	3.33333	3.46131
LTRL590_040017500.1	LtrL590_04:476,662..477,792(-)	376	1131	actin	0.2	6	0.2	6	0.2	6	6	0.142857	8	0.142857	8	0.142857	8	8	0.2	6	0.2	6	0.2	6	0.2	6	6	0.142857	8	0.2	6	0.2	6	0.2	6	0.2	6	0.2	6	0.4	7	5.6	0.2	6	2	2	2.4	2	2.1
LTRL590_350008800.1	LtrL590_35:98,591..99,808(+)	405	1218	ATP-dependent DEAD-box RNA helicase, putative	1	2	0	2	0	1	1.66667	0	5	0	5	0	3	4.33333	0	2	0	2	0	2	0	2	2	0	5	0	2	0	2	0	2	0	2	0	2	0	2	2.14286	0	2	2.66667	2.33333	2.19048	2.33333	2.38095
LTRL590_060007700.1	LtrL590_06:92,105..93,043(-)	312	939	hypothetical protein, conserved	0	1	0	2	0	1	1.33333	0	1	0	1	1	2	1.33333	0	1	0	1	0	1	0	1	1	0	1	0	1	0	1	0	1	0	1	0	1	0	1	0.857143	0	1	0	0.333333	0.47619	0.333333	0.285714
LTRL590_210006200.1	LtrL590_21:28,399..28,950(+)	183	552	hypothetical protein, conserved	0	1	0	2	0	1	1.33333	0	1	0	1	0	1	1	0	1	0	1	0	1	0	1	1	0	1	0	1	0	1	0	1	0	1	0	1	0	1	0.857143	0	1	-0.333333	0	0.142857	0	-0.047619
LTRL590_040011400.1	LtrL590_04:252,888..253,490(-)	200	603	hypothetical protein, conserved	1	2	0.5	3	1	2	2.33333	0	2	0	2	0	1	1.66667	1	2	1	2	1	2	1	2	2	0	2	1	2	1	2	1	2	1	2	1	2	1	2	1.85714	1	2	-0.666667	-0.333333	-0.190476	-0.333333	-0.380952
LTRL590_350010600.1	LtrL590_35:192,547..193,221(+)	224	675	SNF-7-like protein, conserved	1	2	1	2	0.5	3	2.33333	0	2	0	2	0	1	1.66667	1	2	1	2	1	2	1	2	2	0	2	1	2	1	2	1	2	1	2	1	2	1	2	1.85714	1	2	-0.666667	-0.333333	-0.190476	-0.333333	-0.380952
LTRL590_020005200.1	LtrL590_02:9,783..10,439(-)	218	657	cytochrome b-domain protein, putative	1	2	1	2	2	3	2.33333	1	2	1	2	1	2	2	1	2	1	2	1	2	1	2	2	1	2	1	2	1	2	1	2	1	2	1	2	1	2	1.85714	1	2	-0.333333	0	0.142857	0	-0.047619
LTRL590_300032700.1	LtrL590_30:984,367..984,717(-)	116	351	hypothetical protein, conserved	1	2	#DIV/0!	0	#DIV/0!	0	0.666667	2	3	2	3	1.5	5	3.66667	0	1	0	1	0	1	0	1	1	2	3	0	1	0	1	0	1	0	1	0	1	0	1	1.14286	0	1	3	2.66667	2.52381	2.66667	2.71429
LTRL590_350006100.1	LtrL590_35:30,539..31,147(-)	202	609	Ubiquinol-cytochrome C reductase complex 14kD subunit, putative	0	2	0	3	0	2	2.33333	0.5	3	0.5	3	0.5	3	3	0	2	0	2	0	2	0	2	2	0.5	3	0	2	0	2	0	2	0	2	0	2	0	2	1.85714	0	2	0.666667	1	1.14286	1	0.952381
LTRL590_310018900.1	LtrL590_31:491,919..492,257(-)	112	339	Cytochrome b5-like Heme/Steroid binding domain containing protein, putative	0	1	#DIV/0!	0	0	1	0.666667	0	3	0	3	0	2	2.66667	0	1	0	1	0	1	0	1	1	0	3	0	1	0	1	0	1	0	1	0	1	0	1	1.14286	0	1	2	1.66667	1.52381	1.66667	1.71429
LTRL590_340009200.1	LtrL590_34:145,410..145,889(+)	159	480	hypothetical protein, conserved	0	1	0	1	0	1	1	#DIV/0!	0	#DIV/0!	0	#DIV/0!	1	0.333333	0	1	0	1	0	1	0	2	1.25	#DIV/0!	0	0	2	0	2	0	2	0	2	0	2	0	2	1.42857	0	1	-0.666667	-0.916667	-1.09524	-0.666667	-0.83631
LTRL590_310045800.1	LtrL590_31:1,603,876..1,604,235(-)	119	360	dynein-associated protein, putative	0	1	#DIV/0!	0	0	2	1	0	2	0	2	2	3	2.33333	0	1	0	1	0	1	0	2	1.25	0	2	0	2	0	2	0	1	0	1	0	1	0	2	1.42857	0	1	1.33333	1.08333	0.904762	1.33333	1.16369
LTRL590_350019000.1	LtrL590_35:500,030..500,392(+)	120	363	Iron-binding zinc finger CDGSH type, putative	0	2	0	2	0	2	2	#DIV/0!	1	#DIV/0!	1	#DIV/0!	0	0.666667	0	2	0	2	0	2	0	2	2	#DIV/0!	1	0	2	0	2	0	2	0	2	0	2	0	2	1.57143	0	2	-1.33333	-1.33333	-0.904762	-1.33333	-1.22619
LTRL590_300011900.1	LtrL590_30:213,708..214,358(-)	216	651	ribosome biogenesis regulatory protein (RRS1), putative	0	4	0	3	0	2	3	0.5	3	0.5	3	0.5	3	3	0	3	0	3	0	3	0	3	3	0.5	3	0	3	0	3	0	3	0	3	0	3	0	3	2.57143	0	3	0	0	0.428571	0	0.107143
LTRL590_340009900.1	LtrL590_34:171,257..171,469(+)	70	213	hypothetical protein	1	2	1	2	1	2	2	#DIV/0!	0	#DIV/0!	0	#DIV/0!	0	0	1	2	1	2	1	2	1	2	2	#DIV/0!	0	1	2	1	2	1	2	1	2	1	2	1	2	1.57143	1	2	-2	-2	-1.57143	-2	-1.89286
LTRL590_350022900.1	LtrL590_35:643,977..644,399(+)	140	423	hypothetical protein, conserved	0	1	0	1	0	1	1	0	2	0	2	#DIV/0!	0	1.33333	0	1	0	1	0	1	0	1	1	0	2	0	1	0	1	1	2	1	2	1	2	0	1	1.42857	0	1	0.333333	0.333333	-0.0952381	0.333333	0.22619
LTRL590_350017600.1	LtrL590_35:462,378..462,935(+)	185	558	hypothetical protein	0	2	0	2	0	2	2	1	2	1	2	0	2	2	0	2	0	2	0	2	0	2	2	1	2	0	2	0	2	0	2	0	2	0	1	0	2	1.57143	0	2	0	0	0.428571	0	0.107143
LTRL590_060015700.1	LtrL590_06:434,115..434,807(+)	230	693	G-patch domain containing protein, putative	0	2	0	2	0	2	2	0	1	0	1	#DIV/0!	1	1	0	2	0	2	0	2	0	2	2	0	1	0	2	0	2	0	2	0	2	0	2	0	2	1.57143	0	2	-1	-1	-0.571429	-1	-0.892857
LTRL590_210013100.1	LtrL590_21:224,049..224,231(-)	60	183	hypothetical protein	0	2	0	2	0	2	2	0	1	0	1	0	1	1	0	2	0	2	0	2	0	2	2	0	1	0	2	0	2	0	2	0	2	0	2	0	2	1.57143	0	2	-1	-1	-0.571429	-1	-0.892857
LTRL590_030006100.1	LtrL590_03:34,016..34,564(+)	182	549	acetyltransferase, putative	1	2	1	2	1	2	2	#DIV/0!	0	#DIV/0!	0	0	1	0.333333	1	2	1	2	1	2	1	2	2	#DIV/0!	0	1	2	1	2	1	2	1	2	1	2	1	2	1.57143	1	2	-1.66667	-1.66667	-1.2381	-1.66667	-1.55952
LTRL590_220014800.1	LtrL590_22:380,555..380,881(+)	108	327	hypothetical protein, conserved	1	2	1	2	1	2	2	#DIV/0!	0	#DIV/0!	0	#DIV/0!	1	0.333333	1	2	1	2	1	2	1	2	2	#DIV/0!	0	1	2	1	2	1	2	1	2	1	2	1	2	1.57143	1	2	-1.66667	-1.66667	-1.2381	-1.66667	-1.55952
LTRL590_350016600.1	LtrL590_35:433,416..433,688(+)	90	273	hypothetical protein	1	2	1	2	1	2	2	#DIV/0!	0	#DIV/0!	0	0	1	0.333333	1	2	1	2	1	2	1	2	2	#DIV/0!	0	1	2	1	2	1	2	1	2	1	2	1	2	1.57143	1	2	-1.66667	-1.66667	-1.2381	-1.66667	-1.55952
LTRL590_360040200.1	LtrL590_36:1,249,848..1,250,735(-)	295	888	fibrillarin	0	1	0	1	0.5	3	1.66667	0	1	0	1	0	3	1.66667	0	2	0	2	0	2	0	2	2	0	1	0	2	0	2	0	2	0	2	0	2	0	2	1.57143	0	2	0	-0.333333	0.0952381	-0.333333	-0.142857
LTRL590_360011000.1	LtrL590_36:148,622..149,368(+)	248	747	hypothetical protein, conserved	#DIV/0!	0	0	1	0	1	0.666667	0	1	0	1	0	1	1	0	1	0	1	0	1	0	1	1	0	1	0	1	0	1	0	1	0	1	#DIV/0!	0	#DIV/0!	0	0.571429	0	1	0.333333	0	0.428571	0	0.190476
LTRL590_350006300.1	LtrL590_35:33,344..34,690(-)	448	1347	LMBR1-like membrane protein, putative	0.5	3	0.333333	4	0.5	3	3.33333	0.333333	4	0.333333	4	0.5	3	3.66667	0.5	3	0.5	3	0.5	3	0.5	3	3	0.333333	4	0.5	3	0.5	3	0.5	3	0.5	3	0.5	3	0.5	3	2.78571	0.5	3	0.333333	0.666667	0.880952	0.666667	0.636905
LTRL590_100009900.1	LtrL590_10:192,718..193,344(-)	208	627	small GTP-binding protein Rab11, putative	0	1	0	1	1	2	1.33333	0	1	0	1	0	1	1	0	1	0	1	0	1	0	2	1.25	0	1	0	2	0	2	0	2	0	2	0	2	0	2	1.57143	0	1	-0.333333	-0.25	-0.571429	0	-0.28869
LTRL590_280037500.1	LtrL590_28:1,179,949..1,180,266(-)	105	318	hypothetical protein, conserved	1	2	1	2	1	2	2	1	2	1	2	1	2	2	1	2	1	2	1	2	#DIV/0!	0	1.5	1	2	1	2	1	2	1	2	1	2	1	2	1	2	1.85714	1	2	0	0.5	0.142857	0	0.160714
LTRL590_340035400.1	LtrL590_34:1,185,035..1,185,571(+)	178	537	Cytochrome b5-like Heme/Steroid binding domain containing protein, putative	1	2	1	2	1	2	2	0	2	0	2	1	2	2	1	2	1	2	1	2	0.5	3	2.25	0	2	0.5	3	0.5	3	0.5	3	0.5	3	0.5	3	0.5	3	2.5	1	2	0	-0.25	-0.5	0	-0.1875
LTRL590_220019700.1	LtrL590_22:570,113..570,640(+)	175	528	60S ribosomal protein L14, putative	0	1	0	1	0	2	1.33333	0.5	3	0.5	3	2	3	3	0	1	#DIV/0!	0	0	1	0	1	0.75	0.5	3	0	1	0	1	0	1	0	1	#DIV/0!	0	0	1	1	0	1	1.66667	2.25	2	2	1.97917
LTRL590_290024300.1	LtrL590_29:831,747..832,861(-)	370	1113	paraflagellar rod protein 1D, putative	#DIV/0!	0	#DIV/0!	0	0	2	0.666667	#DIV/0!	0	#DIV/0!	0	0	1	0.333333	0	1	0	1	0	1	1	2	1.25	#DIV/0!	0	1	2	0	1	0	1	0	1	0	1	1	2	1	0	1	-0.333333	-0.916667	-0.666667	-0.666667	-0.645833
LTRL590_280018200.1	LtrL590_28:464,159..464,497(+)	112	339	Hsp70 protein, putative	1	2	1	2	1	2	2	0.5	3	0.5	3	#DIV/0!	1	2.33333	1	2	1	2	1	2	#DIV/0!	0	1.5	0.5	3	1	2	1	2	1	2	1	2	1	2	1	2	2	1	2	0.333333	0.833333	0.333333	0.333333	0.458333
LTRL590_300022100.1	LtrL590_30:567,479..567,679(+)	66	201	hypothetical protein	1	6	0.5	3	1.5	5	4.66667	0.333333	4	0.333333	4	0.666667	5	4.33333	1.5	5	1.5	5	1.5	5	1.5	5	5	0.333333	4	1.5	5	1	6	1.5	5	1.5	5	1.5	5	1.5	5	4.5	1.5	5	-0.333333	-0.666667	-0.166667	-0.666667	-0.458333
LTRL590_020009700.1	LtrL590_02:204,965..205,204(-)	79	240	hypothetical protein	0.5	3	0.5	3	0.5	3	3	0	2	0	2	0	2	2	0.5	3	0.5	3	0.5	3	0.5	3	3	0	2	0.5	3	0.5	3	0.5	3	0.5	3	0.5	3	0.5	3	2.5	0.5	3	-1	-1	-0.5	-1	-0.875
LTRL590_130005200.1	LtrL590_13:6,960..7,565(-)	201	606	hypothetical protein, conserved	0.5	3	0.5	3	0.5	3	3	1	2	1	2	0	1	1.66667	0.5	3	0.5	3	0.5	3	0.5	3	3	1	2	0.5	3	0.5	3	0.5	3	0.5	3	0.5	3	0.5	3	2.5	0.5	3	-1.33333	-1.33333	-0.833333	-1.33333	-1.20833
LTRL590_060018700.1	LtrL590_06:506,654..507,349(-)	231	696	protoporphyrinogen oxidase-like protein	0	1	0	1	0.5	3	1.66667	0.5	6	0.5	6	0.666667	5	5.66667	0	2	0	2	0	2	0	2	2	0.5	6	0	2	0	2	0	2	0	2	0	2	0	2	2.28571	0	2	4	3.66667	3.38095	3.66667	3.67857
LTRL590_360048400.1	LtrL590_36:1,480,340..1,480,735(+)	131	396	hypothetical protein, conserved	5	6	5	6	6	7	6.33333	4	5	4	5	1.5	5	5	5	6	5	6	5	6	5	6	6	4	5	5	6	5	6	5	6	5	6	5	6	5	6	5.71429	5	6	-1.33333	-1	-0.714286	-1	-1.0119
LTRL590_130015200.1	LtrL590_13:370,343..371,659(-)	438	1317	proteasome regulatory ATPase subunit 2, putative	0	3	0	3	0	4	3.33333	0	3	0	4	0	4	3.66667	0	3	0	3	0	3	0	3	3	0	4	0	3	0	3	0	3	0	3	0	3	0	3	2.71429	0	3	0.333333	0.666667	0.952381	0.666667	0.654762
LTRL590_120009500.1	LtrL590_12:183,756..184,241(-)	161	486	Eukaryotic protein of unknown function (DUF866), putative	1	2	2	3	1	2	2.33333	0	1	0	1	1	4	2	1	2	1	2	1	2	1	2	2	0	1	1	2	1	2	1	2	1	2	1	2	1	2	1.71429	1	2	-0.333333	0	0.285714	0	-0.0119048
LTRL590_180012800.1	LtrL590_18:323,688..325,088(+)	466	1401	Elongation factor Tu, mitochondrial, putative	0.5	3	1	2	1	2	2.33333	#DIV/0!	0	#DIV/0!	0	0	2	0.666667	1	2	1	2	1	2	1	2	2	#DIV/0!	0	1	2	0.5	3	1	2	1	2	1	2	1	2	1.71429	1	2	-1.66667	-1.33333	-1.04762	-1.33333	-1.34524
LTRL590_190021500.1	LtrL590_19:654,245..654,766(+)	139	420	adenylate cyclase regulatory protein-like protein	#DIV/0!	2	#DIV/0!	0	#DIV/0!	0	0.666667	1	2	0	1	1	2	1.66667	0	1	0	1	1	2	0	1	1.25	0	1	0	1	0	1	0	1	1	2	1	2	0	1	1.14286	0	1	1	0.416667	0.52381	0.666667	0.651786
LTRL590_210023400.1	LtrL590_21:645,120..645,641(-)	173	522	40S ribosomal protein S11, putative	0	2	0	1	0	2	1.66667	0	4	0	4	0	4	4	0	2	0	2	0	2	0	3	2.25	0	4	0	3	0	3	0	2	0	3	#DIV/0!	0	0	2	2.14286	0	2	2.33333	1.75	1.85714	2	1.98512
LTRL590_300005200.1	LtrL590_30:6,453..7,730(-)	425	1278	Alpha/beta hydrolase family, putative	0.2	6	0.5	12	0.5	6	8	0.5	12	0.5	12	0.571429	11	11.6667	0.333333	8	0.333333	8	0.333333	8	0.333333	8	8	0.5	12	0.333333	8	0.333333	8	0.333333	8	0.333333	8	0.333333	8	0.333333	8	7.47619	0.333333	8	3.66667	3.66667	4.19048	3.66667	3.79762
LTRL590_280014300.1	LtrL590_28:320,128..321,864(+)	578	1737	hypothetical protein, conserved	1.25	9	1	8	1.25	9	8.66667	3	4	3	4	0.666667	5	4.33333	1.4	12	1.4	12	1.4	12	#DIV/0!	1	9.25	3	4	1.4	12	1.75	11	1.4	12	1.4	12	1.4	12	1.4	12	9.2	1.25	9	-4.33333	-4.91667	-4.86667	-4.66667	-4.69583
LTRL590_130017600.1	LtrL590_13:443,141..444,403(-)	420	1263	hypothetical protein, conserved	0.25	5	0.25	5	0.25	5	5	0.2	6	0.2	6	0.6	8	6.66667	0.25	5	0.25	5	0.25	5	0.25	5	5	0.2	6	0.25	5	0.25	5	0.25	5	0.25	5	0.25	5	0.25	5	4.46429	0.25	5	1.66667	1.66667	2.20238	1.66667	1.8006
LTRL590_280012600.1	LtrL590_28:272,343..272,903(-)	186	561	hypothetical protein, conserved	0	2	0	2	0	2	2	0	1	0	1	#DIV/0!	0	0.666667	0	2	0	2	0	2	#DIV/0!	0	1.5	0	1	0	2	0	2	0	2	0	2	0	2	0	2	1.57143	0	2	-1.33333	-0.833333	-0.904762	-1.33333	-1.10119
LTRL590_280021400.1	LtrL590_28:570,934..571,350(+)	138	417	Protein of unknown function (DUF423), putative	1	2	1	2	1	2	2	#DIV/0!	0	#DIV/0!	0	1	2	0.666667	1	2	1	2	1	2	#DIV/0!	0	1.5	#DIV/0!	0	1	2	1	2	1	2	1	2	1	2	1	2	1.57143	1	2	-1.33333	-0.833333	-0.904762	-1.33333	-1.10119
LTRL590_330027500.1	LtrL590_33:777,518..777,865(+)	115	348	Presenilin enhancer-2 subunit of gamma secretase/7 transmembrane receptor (Secretin family), putative	1	2	1	2	1	2	2	#DIV/0!	0	#DIV/0!	0	#DIV/0!	0	0	1	2	1	2	1	2	#DIV/0!	0	1.5	#DIV/0!	0	1	2	1	2	1	2	1	2	1	2	1	2	1.57143	1	2	-2	-1.5	-1.57143	-2	-1.76786
LTRL590_000020100.1	LTRL590_SCAF000110:1..359(+)	118	357	hypothetical protein	1	2	1	2	1	2	2	0	1	0	1	0	1	1	1	2	1	2	1	2	#DIV/0!	0	1.5	0	1	1	2	1	2	0	1	1	2	1	2	1	2	1.57143	1	2	-1	-0.5	-0.571429	-1	-0.767857
LTRL590_340013100.1	LtrL590_34:324,268..325,110(+)	280	843	Stage II sporulation protein E (SpoIIE), putative	#DIV/0!	2	#DIV/0!	2	#DIV/0!	2	2	0	1	0	1	0	2	1.33333	#DIV/0!	2	#DIV/0!	2	#DIV/0!	2	2	3	2.25	0	1	2	3	2	3	2	3	2	3	2	3	2	3	2.57143	#DIV/0!	2	-0.666667	-0.916667	-1.2381	-0.666667	-0.872024
LTRL590_100009300.1	LtrL590_10:176,675..177,049(-)	124	375	nuclear transport factor 2, putative	0	1	0	1	0	1	1	0	1	0	1	0	1	1	0	1	0	1	0	1	0	2	1.25	0	1	0	2	0	2	0	2	0	2	0	2	0	2	1.57143	0	1	0	-0.25	-0.571429	0	-0.205357
LTRL590_300012900.1	LtrL590_30:238,458..239,114(+)	218	657	co-chaperone GrpE, putative	0.5	3	1	2	1	2	2.33333	0	3	0	3	0	3	3	0.5	3	0.5	3	0.5	3	1	2	2.75	0	3	0.5	3	0.5	3	0.5	3	0.5	3	0.5	3	0.5	3	2.64286	0.5	3	0.666667	0.25	0.357143	0	0.318452
LTRL590_280029300.1	LtrL590_28:885,587..887,542(+)	651	1956	hypothetical protein, conserved	0.666667	5	0.333333	4	0.75	7	5.33333	0.25	5	0.25	5	0.75	7	5.66667	0.4	7	0.4	7	0.4	7	0	2	5.75	0.25	5	0.4	7	0.4	7	0.4	7	0.4	7	0.4	7	0.4	7	5.77143	0.5	6	0.333333	-0.0833333	-0.104762	-0.333333	-0.0470238
LTRL590_350015300.1	LtrL590_35:369,099..370,397(+)	432	1299	Zinc finger C-x8-C-x5-C-x3-H type (and similar), putative	2	3	1	2	1	2	2.33333	0.75	7	0.75	7	0.333333	4	6	1	2	1	2	1	2	1	2	2	0.75	7	1	2	1	2	1	2	1	2	1	2	1	2	2.57143	1	2	3.66667	4	3.42857	4	3.77381
LTRL590_280037900.1	LtrL590_28:1,184,816..1,185,523(-)	235	708	hypothetical protein, conserved	1	2	1	2	1	2	2	1	4	1	4	1	4	4	1	2	1	2	1	2	#DIV/0!	0	1.5	1	4	1	2	1	2	1	2	1	2	1	2	1	2	2.14286	1	2	2	2.5	1.85714	2	2.08929
LTRL590_300006100.1	LtrL590_30:29,476..29,874(-)	132	399	hypothetical protein	0.5	3	2	3	0.333333	4	3.33333	2	3	2	3	1	4	3.33333	0.5	3	0.5	3	0.5	3	0.5	3	3	2	3	0.5	3	0.5	3	0.5	3	0.5	3	0.5	3	0.5	3	2.64286	0.5	3	0	0.333333	0.690476	0.333333	0.339286
LTRL590_180017200.1	LtrL590_18:504,260..504,589(+)	109	330	hypothetical protein, conserved	0	2	0	2	0	2	2	#DIV/0!	0	#DIV/0!	0	#DIV/0!	0	0	0	2	0	2	0	2	0	2	2	#DIV/0!	0	0	2	0	2	0	2	0	2	0	2	0	2	1.42857	0	2	-2	-2	-1.42857	-2	-1.85714
LTRL590_240028100.1	LtrL590_24:788,428..788,694(-)	88	267	BolA-like protein, putative	0	2	0	2	0	2	2	#DIV/0!	0	#DIV/0!	0	#DIV/0!	0	0	0	2	0	2	0	2	0	2	2	#DIV/0!	0	0	2	0	2	0	2	0	2	0	2	0	2	1.42857	0	2	-2	-2	-1.42857	-2	-1.85714
LTRL590_350006500.1	LtrL590_35:36,801..37,160(-)	119	360	hypothetical protein, conserved	0	2	0	2	0	2	2	#DIV/0!	0	#DIV/0!	0	#DIV/0!	0	0	0	2	0	2	0	2	0	2	2	#DIV/0!	0	0	2	0	2	0	2	0	2	0	2	0	2	1.42857	0	2	-2	-2	-1.42857	-2	-1.85714
LTRL590_000007800.1	LTRL590_SCAF000022:22,937..23,458(+)	173	522	40S ribosomal protein S11, putative	0	2	0	2	0	2	2	0	2	0	2	0	2	2	0	2	0	2	0	2	0	2	2	0	2	0	2	0	2	0	2	0	2	#DIV/0!	0	0	2	1.42857	0	2	0	0	0.571429	0	0.142857
LTRL590_350007900.1	LtrL590_35:73,885..74,310(+)	141	426	hypothetical protein, conserved	1	4	1	4	1	4	4	0.5	3	0.5	3	0.5	3	3	1	4	1	4	1	4	1	4	4	0.5	3	1	4	1	4	1	4	1	4	1	4	1	4	3.42857	1	4	-1	-1	-0.428571	-1	-0.857143
LTRL590_350018100.1	LtrL590_35:473,165..474,121(+)	318	957	2OG-Fe(II) oxygenase superfamily, putative	1	4	1	4	1	4	4	0.5	3	0.5	3	0.5	3	3	1	4	1	4	1	4	1	4	4	0.5	3	1	4	1	4	1	4	1	4	1	4	1	4	3.42857	1	4	-1	-1	-0.428571	-1	-0.857143
LTRL590_350032200.1	LtrL590_35:998,947..999,468(-)	173	522	ankyrin repeat protein, putative	1	4	1	4	1	4	4	2	3	2	3	0.5	3	3	1	4	1	4	1	4	1	4	4	2	3	1	4	1	4	1	4	1	4	1	4	1	4	3.42857	1	4	-1	-1	-0.428571	-1	-0.857143
LTRL590_300022900.1	LtrL590_30:587,352..587,849(+)	165	498	hypothetical protein, conserved	0	2	0	1	0	1	1.33333	1	2	1	2	#DIV/0!	1	1.66667	1	2	1	2	1	2	#DIV/0!	1	1.75	1	2	1	2	1	2	1	2	1	2	1	2	1	2	1.85714	1	2	0.333333	-0.0833333	-0.190476	-0.333333	-0.0684524
LTRL590_230016100.1	LtrL590_23:396,576..397,622(-)	348	1047	mitochondrial RNA binding protein, putative	0.25	5	0.333333	4	0.333333	4	4.33333	0	2	0	2	#DIV/0!	0	1.33333	1	6	1	6	1	6	#DIV/0!	0	4.5	0	2	1	6	1	6	1	6	1	6	1	6	1	6	4.71429	1.5	5	-3	-3.16667	-3.38095	-3.66667	-3.30357
LTRL590_280005800.1	LtrL590_28:25,489..25,812(+)	107	324	Diaminopimelate epimerase, putative	1	2	0.5	3	0.5	3	2.66667	0	1	0	1	1	2	1.33333	0.5	3	0.5	3	0.5	3	#DIV/0!	0	2.25	0	1	0.5	3	1	4	0.5	3	0.5	3	0.5	3	0.5	3	2.5	1	2	-1.33333	-0.916667	-1.16667	-0.666667	-1.02083
LTRL590_210005300.1	LtrL590_21:9,678..10,718(+)	346	1041	Methyltransferase domain containing protein, putative	1	6	0.666667	5	1	6	5.66667	0.6	8	0.6	8	4	5	7	0.666667	5	0.666667	5	0.666667	5	0.5	6	5.25	0.6	8	0.5	6	0.5	6	0.5	6	0.5	6	0.5	6	0.5	6	5.5	0.666667	5	1.33333	1.75	1.5	2	1.64583
LTRL590_180019100.1	LtrL590_18:639,451..639,957(+)	168	507	60S ribosomal protein L34, putative	1	2	0	1	0	1	1.33333	0	1	0	1	1	2	1.33333	1	2	1	2	1	2	0	1	1.75	0	1	1	2	1	2	1	2	1	2	#DIV/0!	0	1	2	1.42857	1	2	0	-0.416667	-0.0952381	-0.666667	-0.294643
LTRL590_360057800.1	LtrL590_36:1,834,313..1,834,996(+)	227	684	60S acidic ribosomal protein, putative	0.5	3	1	2	0.5	3	2.66667	#DIV/0!	1	#DIV/0!	1	0.5	3	1.66667	0.5	3	0.5	3	0.5	3	0.5	3	3	#DIV/0!	1	0.5	3	0.5	3	0.5	3	0.5	3	0.5	3	0.5	3	2.35714	0.5	3	-1	-1.33333	-0.690476	-1.33333	-1.08929
LTRL590_030014700.1	LtrL590_03:372,966..373,757(-)	263	792	inorganic pyrophosphatase, putative	0.666667	5	0.666667	5	0.666667	5	5	1.5	5	1.5	5	1	2	4	0.666667	5	0.666667	5	0.666667	5	0.666667	5	5	1.5	5	0.666667	5	0.666667	5	0.666667	5	0.666667	5	0.666667	5	0.666667	5	4.38095	0.666667	5	-1	-1	-0.380952	-1	-0.845238
LTRL590_280028900.1	LtrL590_28:878,086..878,358(+)	90	273	Dynein light chain LC6, flagellar outer arm, putative	0	2	0	2	0	2	2	#DIV/0!	0	#DIV/0!	0	#DIV/0!	0	0	0	2	0	2	0	2	#DIV/0!	0	1.5	#DIV/0!	0	0	2	0	2	0	2	0	2	0	2	0	2	1.42857	0	2	-2	-1.5	-1.42857	-2	-1.73214
LTRL590_250027400.1	LtrL590_25:784,765..785,604(-)	279	840	2,4-dihydroxyhept-2-ene-1,7-dioic acid aldolase, putative	0	2	0	2	0	2	2	0	3	0	3	0	2	2.66667	0	3	0	3	0	1	0	3	2.5	0	3	0	3	0	3	0	3	0	3	0	3	0	3	2.57143	0	2	0.666667	0.166667	0.0952381	0.666667	0.39881
LTRL590_030005800.1	LtrL590_03:24,817..25,578(+)	253	762	cytochrome c oxidase assembly protein, putative	0	5	0	4	0	4	4.33333	0.25	5	0.25	5	0.5	3	4.33333	0	4	0	4	0	4	0	4	4	0.25	5	0	4	0	4	0	4	0	4	0	4	0	4	3.57143	0	4	0	0.333333	0.761905	0.333333	0.357143
LTRL590_320028800.1	LtrL590_32:855,348..855,725(-)	125	378	hypothetical protein, conserved	0.333333	4	0	3	0	3	3.33333	0.5	3	0.5	3	1	2	2.66667	0	3	0	3	0	3	0	3	3	0.5	3	0	3	0	3	0	3	0	3	0	3	0	3	2.57143	0	3	-0.666667	-0.333333	0.0952381	-0.333333	-0.309524
LTRL590_130019300.1	LtrL590_13:507,412..508,116(-)	234	705	programmed cell death 6 protein-like protein	0	2	0	2	0.5	3	2.33333	#DIV/0!	1	#DIV/0!	1	1	2	1.33333	0	2	0	2	0	2	0	2	2	#DIV/0!	1	0	2	0	2	0	2	0	2	0	2	0	2	1.57143	0	2	-1	-0.666667	-0.238095	-0.666667	-0.642857
LTRL590_240029800.1	LtrL590_24:851,866..853,059(-)	397	1194	hypothetical protein, conserved	0.666667	5	1.33333	7	0.666667	5	5.66667	0.571429	11	0.571429	11	0.666667	5	9	0.666667	5	0.666667	5	0.666667	5	0.666667	5	5	0.571429	11	0.666667	5	0.666667	5	0.666667	5	0.666667	5	0.666667	5	0.666667	5	5.2381	0.666667	5	3.33333	4	3.7619	4	3.77381
LTRL590_260008900.1	LtrL590_26:107,689..108,615(-)	308	927	nucleotide binding protein-like protein	0	2	0	2	0	3	2.33333	1	2	1	2	1	2	2	0.5	3	0.5	3	0.5	3	1	2	2.75	1	2	0.5	3	0.5	3	0.5	3	0.5	3	0.5	3	0.5	3	2.5	0	2	-0.333333	-0.75	-0.5	0	-0.395833
LTRL590_050012300.1	LtrL590_05:296,787..297,230(+)	147	444	hypothetical protein, conserved	1	2	1	2	0.5	3	2.33333	0	2	0	2	0	1	1.66667	0.5	3	0.5	3	0.5	3	1	2	2.75	0	2	0.5	3	0.5	3	0.5	3	0.5	3	0.5	3	0.5	3	2.5	1	2	-0.666667	-1.08333	-0.833333	-0.333333	-0.729167
LTRL590_160005800.1	LtrL590_16:18,918..19,411(-)	164	492	Galactose oxidase, central domain containing protein, putative	#DIV/0!	0	0	1	#DIV/0!	0	0.333333	0	3	0	3	0	3	3	0	1	0	1	#DIV/0!	0	0	1	0.75	0	3	0	1	0	1	0	1	0	1	#DIV/0!	0	0	1	1	0	1	2.66667	2.25	2	2	2.22917
LTRL590_280030700.1	LtrL590_28:939,971..941,188(+)	405	1218	eukaryotic translation initiation factor, putative	0.333333	4	0	3	0	4	3.66667	0	3	0	3	0	2	2.66667	0	4	0	4	0	4	#DIV/0!	0	3	0	3	0	4	0	4	0	4	0	4	0	4	0	4	3.28571	0	3	-1	-0.333333	-0.619048	-0.333333	-0.571429
LTRL590_230019000.1	LtrL590_23:507,724..508,134(-)	136	411	hypothetical protein, conserved	2	3	1	2	1	2	2.33333	1	2	1	2	1	2	2	2	3	2	3	2	3	2	3	3	1	2	2	3	2	3	2	3	2	3	2	3	2	3	2.71429	2	3	-0.333333	-1	-0.714286	-1	-0.761905
LTRL590_300025600.1	LtrL590_30:710,591..711,136(+)	181	546	hypothetical protein	2	3	2	3	3	4	3.33333	#DIV/0!	3	#DIV/0!	3	3	4	3.33333	3	4	3	4	3	4	3	4	4	#DIV/0!	3	3	4	3	4	3	4	3	4	3	4	3	4	3.71429	3	4	0	-0.666667	-0.380952	-0.666667	-0.428571
LTRL590_180019600.1	LtrL590_18:664,837..665,538(+)	233	702	EF-hand domain pair, putative	2	3	1	2	1	2	2.33333	#DIV/0!	2	#DIV/0!	2	1	4	2.66667	2	3	2	3	2	3	2	3	3	#DIV/0!	2	2	3	2	3	2	3	2	3	2	3	2	3	2.71429	2	3	0.333333	-0.333333	-0.047619	-0.333333	-0.0952381
LTRL590_240024600.1	LtrL590_24:660,392..660,970(-)	192	579	ubiquitin-conjugating enzyme E2, putative	#DIV/0!	0	0	1	#DIV/0!	0	0.333333	#DIV/0!	0	#DIV/0!	0	0.5	3	1	0	1	0	1	0	1	0	1	1	#DIV/0!	0	0	1	0	1	0	1	0	1	0	1	0	1	0.714286	0	1	0.666667	0	0.285714	0	0.238095
LTRL590_350006200.1	LtrL590_35:32,029..32,583(-)	184	555	coatomer subunit zeta, putative	#DIV/0!	1	1	2	#DIV/0!	1	1.33333	#DIV/0!	1	#DIV/0!	1	0	2	1.33333	1	2	1	2	1	2	1	2	2	#DIV/0!	1	1	2	1	2	1	2	1	2	1	2	1	2	1.71429	1	2	0	-0.666667	-0.380952	-0.666667	-0.428571
LTRL590_150018300.1	LtrL590_15:499,478..499,843(-)	121	366	hypothetical protein, conserved	0	1	0	1	0	2	1.33333	#DIV/0!	2	#DIV/0!	2	2	3	2.33333	2	3	1	2	1	2	#DIV/0!	1	2	#DIV/0!	2	1	2	#DIV/0!	1	1	2	1	2	1	2	1	2	1.71429	1	2	1	0.333333	0.619048	0.333333	0.571429
LTRL590_040007200.1	LtrL590_04:68,741..69,613(+)	290	873	GRAM domain containing protein, putative	2	6	4	5	4	5	5.33333	3	4	3	4	#DIV/0!	1	3	5	6	5	6	5	6	5	6	6	3	4	5	6	2.5	7	5	6	5	6	5	6	5	6	5.71429	5	6	-2.33333	-3	-2.71429	-3	-2.7619
LTRL590_300009500.1	LtrL590_30:133,241..133,993(-)	250	753	hypothetical protein, conserved	4	5	1.5	5	5	6	5.33333	1.5	5	1.5	5	1	6	5.33333	5	6	5	6	5	6	5	6	6	1.5	5	5	6	5	6	5	6	5	6	5	6	5	6	5.71429	5	6	0	-0.666667	-0.380952	-0.666667	-0.428571
LTRL590_350022200.1	LtrL590_35:624,436..625,638(-)	400	1203	Leucine rich repeat, putative	2	6	1.5	5	1.5	5	5.33333	0.333333	8	0.333333	8	1	4	6.66667	1	6	1	6	1	6	1	6	6	0.333333	8	1	6	1.33333	7	1	6	1	6	1	6	1	6	5.71429	1	6	1.33333	0.666667	0.952381	0.666667	0.904762
LTRL590_350008400.1	LtrL590_35:89,805..90,821(+)	338	1017	3-keto-dihydrosphingosine reductase	0	2	0	2	0	1	1.66667	0	4	0	4	1	2	3.33333	0	1	0	1	0	1	0	1	1	0	4	0	1	0	1	0	1	0	1	0	1	0	1	1.28571	0	1	1.66667	2.33333	2.04762	2.33333	2.09524
LTRL590_300019300.1	LtrL590_30:450,917..451,783(+)	288	867	U3 small nuclear ribonucleoprotein (snRNP), putative	#DIV/0!	3	#DIV/0!	2	#DIV/0!	2	2.33333	2	3	2	3	2	3	3	2	3	2	3	2	3	2	3	3	2	3	2	3	2	3	2	3	2	3	2	3	2	3	2.85714	2	3	0.666667	0	0.142857	0	0.202381
LTRL590_180016300.1	LtrL590_18:465,833..466,831(+)	332	999	protein kinase A catalytic subunit	#DIV/0!	0	#DIV/0!	0	#DIV/0!	1	0.333333	0	1	0	1	0	1	1	0	1	0	1	0	1	0	1	1	0	1	0	1	0	1	0	1	0	1	0	1	0	1	0.857143	0	1	0.666667	0	0.142857	0	0.202381
LTRL590_180009900.1	LtrL590_18:194,918..195,616(-)	232	699	tubulin-specific chaperone, putative	#DIV/0!	0	#DIV/0!	0	0	1	0.333333	0	1	0	1	#DIV/0!	2	1.33333	0	1	0	1	0	1	0	1	1	0	1	0	1	0	1	0	1	0	1	0	1	0	1	0.857143	0	1	1	0.333333	0.47619	0.333333	0.535714
LTRL590_300037900.1	LtrL590_30:1,146,787..1,147,074(+)	95	288	hypothetical protein, conserved	#DIV/0!	0	0	1	#DIV/0!	0	0.333333	0	1	0	1	0	2	1.33333	0	1	0	1	0	1	0	1	1	0	1	0	1	0	1	0	1	0	1	0	1	0	1	0.857143	0	1	1	0.333333	0.47619	0.333333	0.535714
LTRL590_090017000.1	LtrL590_09:417,676..418,671(-)	331	996	eukaryotic translation initiation factor 2 subunit, putative	0	1	#DIV/0!	0	#DIV/0!	0	0.333333	0	1	0	1	0	3	1.66667	0	1	0	1	0	1	0	1	1	0	1	0	1	0	1	0	1	0	1	0	1	0	1	0.857143	0	1	1.33333	0.666667	0.809524	0.666667	0.869048
LTRL590_250020700.1	LtrL590_25:552,309..553,109(-)	266	801	Conserved hypothetical ATP binding protein, putative	#DIV/0!	0	#DIV/0!	0	#DIV/0!	1	0.333333	1	2	0	1	0	2	1.66667	0	1	0	1	0	1	0	1	1	0	1	0	1	0	1	0	1	0	1	0	1	0	1	0.857143	0	1	1.33333	0.666667	0.809524	0.666667	0.869048
LTRL590_130007100.1	LtrL590_13:70,322..70,957(-)	211	636	ras-related protein RAB5B, putative	0	2	0	3	0.5	3	2.66667	0.666667	5	0.666667	5	0	3	4.33333	0	2	0	2	0	2	0	2	2	0.666667	5	0	2	0	2	0	2	0	2	0	2	0	2	2.14286	0	2	1.66667	2.33333	2.19048	2.33333	2.13095
LTRL590_360008300.1	LtrL590_36:76,398..77,090(-)	230	693	dolicholphosphate-mannose synthase, putative	#DIV/0!	0	#DIV/0!	0	#DIV/0!	1	0.333333	0	2	0	2	0.25	5	3	0	1	0	1	0	1	0	1	1	0	2	0	1	0	1	0	1	0	1	#DIV/0!	0	0	1	0.857143	0	1	2.66667	2	2.14286	2	2.20238
LTRL590_360044300.1	LtrL590_36:1,360,353..1,361,012(-)	219	660	SNF7-like protein	0.25	5	0.333333	4	0.666667	5	4.66667	0.333333	4	0.333333	4	0.5	6	4.66667	0.666667	5	0.666667	5	1	4	0.666667	5	4.75	0.333333	4	0.666667	5	0.666667	5	0.666667	5	0.666667	5	0.666667	5	0.666667	5	4.2381	0.666667	5	0	-0.0833333	0.428571	-0.333333	0.00297619
LTRL590_230022700.1	LtrL590_23:641,858..642,427(+)	189	570	YceI-like domain containing protein, putative	0.5	3	0.5	3	0.5	3	3	0	1	0	1	#DIV/0!	0	0.666667	0.5	3	0.5	3	0.5	3	0.5	3	3	0	1	0.5	3	0.5	3	0.5	3	0.5	3	0.5	3	0.5	3	2.35714	0.5	3	-2.33333	-2.33333	-1.69048	-2.33333	-2.17262
LTRL590_300012500.1	LtrL590_30:227,526..228,011(-)	161	486	nuclear movement protein, putative	0.5	3	0.5	3	0.5	3	3	#DIV/0!	1	#DIV/0!	1	#DIV/0!	1	1	0.5	3	0.5	3	0.5	3	0.5	3	3	#DIV/0!	1	0.5	3	0.5	3	0.5	3	0.5	3	0.5	3	0.5	3	2.35714	0.5	3	-2	-2	-1.35714	-2	-1.83929
LTRL590_130005800.1	LtrL590_13:23,170..24,681(-)	503	1512	carboxypeptidase, putative	0.5	6	0.5	6	0.5	6	6	0.166667	7	0.166667	7	1	8	7.33333	0.5	6	0.5	6	0.5	6	0.5	6	6	0.166667	7	0.5	6	0.5	6	0.5	6	0.5	6	0.5	6	0.5	6	5.35714	0.5	6	1.33333	1.33333	1.97619	1.33333	1.49405
LTRL590_350017900.1	LtrL590_35:469,184..470,269(+)	361	1086	ATPase family associated with various cellular activities (AAA), putative	1	2	0.5	3	1	2	2.33333	0	2	0.5	3	0	1	2	0.5	3	0.5	3	0.5	3	0.5	3	3	0.5	3	0.5	3	0.5	3	0.5	3	0.5	3	0.5	3	0.5	3	2.64286	0.5	3	-0.333333	-1	-0.642857	-1	-0.744048
LTRL590_080014400.1	LtrL590_08:376,139..377,236(+)	365	1098	hypothetical protein, conserved	0.5	3	1	2	1	2	2.33333	0.5	3	0.5	3	2	3	3	0.5	3	0.5	3	0.5	3	0.5	3	3	0.5	3	0.5	3	0.5	3	0.5	3	0.5	3	0.5	3	0.5	3	2.64286	0.5	3	0.666667	0	0.357143	0	0.255952
LTRL590_150010100.1	LtrL590_15:185,131..185,595(+)	154	465	ecotin, putative	0	2	0	2	0	3	2.33333	#DIV/0!	2	#DIV/0!	2	#DIV/0!	3	2.33333	0.5	3	0.5	3	0.5	3	0.5	3	3	#DIV/0!	2	0.5	3	1	4	0.5	3	0.5	3	0.5	3	0.5	3	2.64286	0.5	3	0	-0.666667	-0.309524	-0.666667	-0.410714
LTRL590_060018300.1	LtrL590_06:497,568..498,284(+)	238	717	hypothetical protein, conserved	0.5	3	1	2	1	2	2.33333	0.5	3	0.5	3	3	4	3.33333	0.5	3	0.5	3	0.5	3	0.5	3	3	0.5	3	0.5	3	0.5	3	0.5	3	0.5	3	0.5	3	0.5	3	2.64286	0.5	3	1	0.333333	0.690476	0.333333	0.589286
LTRL590_220019300.1	LtrL590_22:560,784..561,869(+)	361	1086	Serine-threonin protein phosphatase, putative	1	6	0.666667	5	0.75	7	6	0.75	7	0.75	7	1	6	6.66667	0.5	6	0.5	6	0.5	6	0.5	6	6	0.75	7	0.5	6	0.5	6	0.5	6	0.5	6	0.5	6	0.5	6	5.35714	0.5	6	0.666667	0.666667	1.30952	0.666667	0.827381
LTRL590_340024300.1	LtrL590_34:753,835..756,561(-)	908	2727	hypothetical protein, conserved	1	14	0.75	14	0.857143	13	13.6667	1	20	1	20	0.416667	17	19	0.857143	13	0.857143	13	0.857143	13	0.875	15	13.5	1	20	0.875	15	0.875	15	0.875	15	0.875	15	0.875	15	0.875	15	13.6964	0.857143	13	5.33333	5.5	5.30357	6	5.53423
LTRL590_340030500.1	LtrL590_34:990,923..992,596(+)	557	1674	hypothetical protein, conserved	0.25	5	0.2	6	0.25	5	5.33333	0	5	0	5	0.666667	5	5	0.25	5	0.25	5	0.25	5	0.4	7	5.5	0	5	0.4	7	0.4	7	0.4	7	0.4	7	0.4	7	0.4	7	5.77143	0.25	5	-0.333333	-0.5	-0.771429	0	-0.40119
LTRL590_230016600.1	LtrL590_23:417,240..418,304(-)	354	1065	hypothetical protein, conserved	0.5	3	0.5	3	0.333333	4	3.33333	0.666667	5	0.666667	5	1.5	5	5	0.333333	4	0.333333	4	0.333333	4	0.333333	4	4	0.666667	5	0.333333	4	0.333333	4	0.333333	4	0.333333	4	0.333333	4	0.333333	4	3.61905	0.333333	4	1.66667	1	1.38095	1	1.2619
LTRL590_200021900.1	LtrL590_20:688,134..688,391(-)	85	258	hypothetical protein, conserved	0	1	#DIV/0!	0	#DIV/0!	0	0.333333	#DIV/0!	0	#DIV/0!	0	#DIV/0!	0	0	0	1	0	1	0	1	#DIV/0!	0	0.75	#DIV/0!	0	0	1	0	1	0	1	0	1	#DIV/0!	0	0	1	0.571429	#DIV/0!	0	-0.333333	-0.75	-0.571429	0	-0.41369
LTRL590_050009900.1	LtrL590_05:184,264..185,274(+)	336	1011	cdc2-related kinase, putative	0	3	0	2	0	2	2.33333	0	3	0	3	0	2	2.66667	0	3	0	3	0	3	0	2	2.75	0	3	0	3	0	3	0	3	0	3	0	3	0	3	2.57143	0	2	0.333333	-0.0833333	0.0952381	0.666667	0.252976
LTRL590_230011000.1	LtrL590_23:189,852..190,142(+)	96	291	hypothetical protein, conserved	#DIV/0!	2	#DIV/0!	2	#DIV/0!	2	2	#DIV/0!	1	#DIV/0!	1	#DIV/0!	2	1.33333	2	3	2	3	2	3	0	1	2.5	#DIV/0!	1	2	3	2	3	0	1	0	1	0	1	2	3	1.71429	#DIV/0!	2	-0.666667	-1.16667	-0.380952	-0.666667	-0.720238
LTRL590_330026100.1	LtrL590_33:737,895..738,176(+)	93	282	hypothetical protein	#DIV/0!	1	1	2	1	2	1.66667	0	1	0	1	0	1	1	1	2	1	2	1	2	#DIV/0!	0	1.5	0	1	1	2	1	2	1	2	1	2	1	2	1	2	1.71429	#DIV/0!	1	-0.666667	-0.5	-0.714286	0	-0.470238
LTRL590_290015200.1	LtrL590_29:353,855..354,394(-)	179	540	ADP-ribosylation factor-like protein 3A, putative	0.5	3	0	2	0	2	2.33333	0	3	0	3	0	3	3	0	3	0	3	0	3	0	3	3	0	3	0	3	0	3	0	3	0	3	0	3	0	3	2.57143	0	3	0.666667	0	0.428571	0	0.27381
LTRL590_210011300.1	LtrL590_21:176,768..177,058(-)	96	291	Qc-SNARE protein, putative	0	1	0	2	0	1	1.33333	0	1	0	1	0	1	1	0	2	0	2	0	2	0	2	2	0	1	0	2	0	2	0	2	0	2	0	2	0	2	1.57143	0	2	-0.333333	-1	-0.571429	-1	-0.72619
LTRL590_080013800.1	LtrL590_08:343,085..343,525(-)	146	441	hypothetical protein, conserved	0	2	0	4	0	2	2.66667	0	4	0	4	0	4	4	0	2	0	2	0	2	0	2	2	0	4	0	2	0	2	0	2	0	2	0	2	0	2	2	0	2	1.33333	2	2	2	1.83333
LTRL590_360042300.1	LtrL590_36:1,308,710..1,310,257(-)	515	1548	Fungal domain of unknown function (DUF1712), putative	6	7	5	6	5	6	6.33333	2.5	7	2.5	7	2	9	7.66667	6	7	6	7	6	7	6	7	7	2.5	7	6	7	6	7	7	8	6	7	6	7	6	7	7	6	7	1.33333	0.666667	0.666667	0.666667	0.833333
LTRL590_130006800.1	LtrL590_13:57,562..58,308(-)	248	747	hypothetical protein, conserved	2	3	1	2	2	3	2.66667	2	3	2	3	#DIV/0!	0	2	1	2	1	2	1	2	1	2	2	2	3	1	2	1	2	1	2	1	2	1	2	1	2	2	1	2	-0.666667	0	0	0	-0.166667
LTRL590_310030800.1	LtrL590_31:1,074,751..1,074,999(-)	82	249	hypothetical protein	1	2	1	2	0	1	1.66667	1	2	1	2	0	1	1.66667	0	1	0	1	0	1	0	1	1	1	2	0	1	0	1	0	1	0	1	0	1	0	1	1	0	1	0	0.666667	0.666667	0.666667	0.5
LTRL590_200015800.1	LtrL590_20:403,280..403,603(+)	107	324	glutaredoxin, putative	0	1	#DIV/0!	0	#DIV/0!	0	0.333333	0	2	0	2	0	1	1.66667	0	1	0	1	0	1	0	1	1	0	2	0	1	0	1	0	1	0	1	0	1	0	1	1	0	1	1.33333	0.666667	0.666667	0.666667	0.833333
LTRL590_290014700.1	LtrL590_29:339,898..340,242(-)	114	345	RNA recognition motif. (a.k.a. RRM, RBD, or RNP domain), putative	#DIV/0!	0	#DIV/0!	0	#DIV/0!	1	0.333333	1	2	1	2	0	1	1.66667	0	1	0	1	0	1	0	1	1	1	2	0	1	0	1	0	1	0	1	0	1	0	1	1	0	1	1.33333	0.666667	0.666667	0.666667	0.833333
LTRL590_290017300.1	LtrL590_29:424,269..424,862(+)	197	594	hypothetical protein, conserved	#DIV/0!	1	#DIV/0!	0	#DIV/0!	0	0.333333	0	2	0	2	0	1	1.66667	0	1	0	1	0	1	0	1	1	0	2	0	1	0	1	0	1	0	1	0	1	0	1	1	0	1	1.33333	0.666667	0.666667	0.666667	0.833333
LTRL590_350024700.1	LtrL590_35:700,717..701,424(+)	235	708	ATP11 protein, putative	1	2	2	3	0.5	6	3.66667	#DIV/0!	1	#DIV/0!	1	1	4	2	2	3	2	3	2	3	2	3	3	#DIV/0!	1	2	3	2	3	3	4	3	4	3	4	2	3	3	2	3	-1.66667	-1	-1	-1	-1.16667
LTRL590_200007700.1	LtrL590_20:80,570..81,709(-)	379	1140	deoxyhypusine synthase, putative	1	2	1	2	2	3	2.33333	#DIV/0!	4	#DIV/0!	4	0.333333	4	4	2	3	2	3	2	3	2	3	3	#DIV/0!	4	2	3	2	3	2	3	2	3	2	3	2	3	3	2	3	1.66667	1	1	1	1.16667
LTRL590_360033100.1	LtrL590_36:1,019,964..1,020,743(+)	259	780	hypothetical protein, conserved	2	6	1	4	1	4	4.66667	1.33333	7	1.33333	7	0.666667	5	6.33333	1	4	1	4	1	4	1	4	4	1.33333	7	1	4	1	4	1	4	1	4	1	4	1	4	4	1	4	1.66667	2.33333	2.33333	2.33333	2.16667
LTRL590_340030800.1	LtrL590_34:1,004,634..1,004,903(+)	89	270	acyl-CoA binding protein, putative	0.5	3	0.5	3	0.5	3	3	1.5	5	1.5	5	1.5	5	5	0.5	3	0.5	3	0.5	3	1	4	3.25	1.5	5	1	4	1	4	1	4	1	4	1	4	1	4	3.71429	0.5	3	2	1.75	1.28571	2	1.75893
LTRL590_010007600.1	LtrL590_01:76,073..76,399(-)	108	327	thioredoxin, putative	#DIV/0!	0	#DIV/0!	0	#DIV/0!	0	0	#DIV/0!	0	#DIV/0!	0	#DIV/0!	0	0	#DIV/0!	0	#DIV/0!	0	#DIV/0!	0	0	1	0.25	#DIV/0!	0	0	1	0	1	0	1	0	1	0	1	0	1	0.714286	#DIV/0!	0	0	-0.25	-0.714286	0	-0.241071
LTRL590_010010300.1	LtrL590_01:144,963..145,145(+)	60	183	hypothetical protein	#DIV/0!	0	#DIV/0!	0	#DIV/0!	0	0	#DIV/0!	0	#DIV/0!	0	0	3	1	#DIV/0!	0	#DIV/0!	0	#DIV/0!	0	0	1	0.25	#DIV/0!	0	0	1	0	1	0	1	0	1	0	1	0	1	0.714286	#DIV/0!	0	1	0.75	0.285714	1	0.758929
LTRL590_100014000.1	LtrL590_10:296,937..297,857(-)	306	921	Spinocerebellar ataxia type 10 protein domain containing protein, putative	0	1	0.333333	4	0	1	2	0.333333	4	0.333333	4	0	1	3	0	2	0	2	0	2	0	3	2.25	0.333333	4	0	3	0	3	0	3	0	3	0	3	0	3	2.71429	0	2	1	0.75	0.285714	1	0.758929
LTRL590_340038700.1	LtrL590_34:1,301,837..1,302,289(+)	150	453	hypothetical protein, conserved	#DIV/0!	0	#DIV/0!	0	#DIV/0!	0	0	0	2	0	2	0	1	1.66667	#DIV/0!	0	#DIV/0!	0	#DIV/0!	0	0	1	0.25	0	2	#DIV/0!	0	0	1	0	1	0	1	0	1	#DIV/0!	0	0.714286	#DIV/0!	0	1.66667	1.41667	0.952381	1.66667	1.4256
LTRL590_230023100.1	LtrL590_23:659,746..660,993(+)	415	1248	hypothetical protein, conserved	1.5	5	1	4	1	4	4.33333	0.25	5	0.25	5	1	4	4.66667	0.666667	5	0.666667	5	0.666667	5	0.666667	5	5	0.25	5	0.666667	5	1	6	0.666667	5	0.666667	5	0.666667	5	0.666667	5	4.52381	0.666667	5	0.333333	-0.333333	0.142857	-0.333333	-0.047619
LTRL590_350016300.1	LtrL590_35:421,447..421,854(+)	135	408	Selenoprotein T, putative	0.25	5	0.25	5	0.25	5	5	0.5	3	0.5	3	1	2	2.66667	0.25	5	0.25	5	0.25	5	0.25	5	5	0.5	3	0.25	5	0.4	7	0.25	5	0.25	5	0.25	5	0.25	5	4.32143	0.25	5	-2.33333	-2.33333	-1.65476	-2.33333	-2.16369
LTRL590_270020000.1	LtrL590_27:589,499..589,834(+)	111	336	60s Acidic ribosomal protein, putative	0	1	0	1	#DIV/0!	0	0.666667	#DIV/0!	0	#DIV/0!	0	#DIV/0!	0	0	0	1	#DIV/0!	0	0	1	0	1	0.75	#DIV/0!	0	0	1	0	1	0	1	0	1	#DIV/0!	0	0	1	0.571429	#DIV/0!	0	-0.666667	-0.75	-0.571429	0	-0.497024
LTRL590_360048800.1	LtrL590_36:1,491,584..1,492,261(+)	225	678	Snf7, putative	0	5	0.25	5	0	5	5	0.25	5	0.25	5	3	4	4.66667	0.25	5	0.25	5	0.25	5	0.25	5	5	0.25	5	0.25	5	0.25	5	0.25	5	0.25	5	0.25	5	0.25	5	4.32143	0.25	5	-0.333333	-0.333333	0.345238	-0.333333	-0.16369
LTRL590_280030100.1	LtrL590_28:918,772..919,437(+)	221	666	glycosomal membrane protein-like protein	#DIV/0!	6	3.5	9	3	8	7.66667	1.5	5	1.5	5	1	8	6	4	10	4	10	4	10	#DIV/0!	1	7.75	1.5	5	4	10	4	10	4	10	4	10	4	10	4	10	8.42857	#DIV/0!	8	-1.66667	-1.75	-2.42857	-2	-1.96131
LTRL590_290010800.1	LtrL590_29:198,550..198,969(-)	139	420	ADF/Cofilin	#DIV/0!	0	#DIV/0!	0	0	1	0.333333	#DIV/0!	0	#DIV/0!	0	#DIV/0!	0	0	0	1	0	1	0	1	#DIV/0!	0	0.75	#DIV/0!	0	#DIV/0!	0	#DIV/0!	0	0	1	0	1	0	1	#DIV/0!	0	0.285714	0	1	-0.333333	-0.75	-0.285714	-1	-0.592262
LTRL590_350029000.1	LtrL590_35:880,597..881,196(+)	199	600	Eukaryotic protein of unknown function (DUF1764), putative	1	2	0.5	3	1	2	2.33333	1	2	1	2	#DIV/0!	2	2	0.5	3	0.5	3	0.5	3	0.5	3	3	1	2	0.5	3	0.5	3	0.5	3	0.5	3	0.5	3	0.5	3	2.5	0.5	3	-0.333333	-1	-0.5	-1	-0.708333
LTRL590_260033100.1	LtrL590_26:1,053,231..1,054,034(+)	267	804	6-phosphogluconolactonase	1.5	5	1	4	3	4	4.33333	0.666667	5	0.666667	5	#DIV/0!	2	4	1.5	5	1.5	5	1.5	5	1.5	5	5	0.666667	5	1.5	5	1.5	5	1.5	5	1.5	5	1.5	5	1.5	5	4.5	1.5	5	-0.333333	-1	-0.5	-1	-0.708333
LTRL590_210012600.1	LtrL590_21:208,979..210,271(-)	430	1293	histone deacetylase, putative	0.75	7	0.5	6	0.5	6	6.33333	0.75	7	0.75	7	0.666667	5	6.33333	0.5	6	0.5	6	0.5	6	0.5	6	6	0.75	7	0.5	6	0.75	7	0.5	6	0.5	6	0.5	6	0.5	6	5.5	0.5	6	0	0.333333	0.833333	0.333333	0.375
LTRL590_350022700.1	LtrL590_35:640,579..640,938(-)	119	360	dynein-associated roadblock protein-like protein	1	4	0.5	3	0.5	3	3.33333	1	2	1	2	#DIV/0!	1	1.66667	0.5	3	0.5	3	0.5	3	0.5	3	3	1	2	0.5	3	0.5	3	0.5	3	0.5	3	0.5	3	0.5	3	2.5	0.5	3	-1.66667	-1.33333	-0.833333	-1.33333	-1.29167
LTRL590_280007700.1	LtrL590_28:87,799..88,548(+)	249	750	phosphoadenosine phosphosulfate reductase-like protein	0	2	0	2	0	3	2.33333	0.333333	4	0.333333	4	0.333333	4	4	0	2	0	2	0	2	#DIV/0!	0	1.5	0.333333	4	0	2	0	2	0	2	0	2	0	2	0	2	2	0	2	1.66667	2.5	2	2	2.04167
LTRL590_280031200.1	LtrL590_28:956,453..957,895(+)	480	1443	serine hydroxymethyltransferase (SHMT-L)	0.333333	4	0	1	0	2	2.33333	0	3	0	3	0	1	2.33333	0	2	0	2	0	2	#DIV/0!	0	1.5	0	3	0	2	0	2	0	2	0	2	0	2	0	2	1.85714	0	2	0	0.833333	0.47619	0.333333	0.410714
LTRL590_040014400.1	LtrL590_04:366,469..367,110(-)	213	642	60S ribosomal protein L10, putative	#DIV/0!	0	0	1	0	1	0.666667	0	2	0.5	3	0	2	2.33333	0	2	0	2	0	1	0	1	1.5	0.5	3	0	1	#DIV/0!	0	0	1	0	2	#DIV/0!	0	0	2	1.14286	0	1	1.66667	0.833333	1.19048	1.33333	1.25595
LTRL590_230016200.1	LtrL590_23:398,738..399,112(-)	124	375	hypothetical protein	0	2	0.5	3	0	2	2.33333	#DIV/0!	1	#DIV/0!	1	#DIV/0!	1	1	0.5	3	0.5	3	0.5	3	#DIV/0!	0	2.25	#DIV/0!	1	0.5	3	0.5	3	0.5	3	0.5	3	0.5	3	0.5	3	2.35714	0.5	3	-1.33333	-1.25	-1.35714	-2	-1.48512
LTRL590_040017300.1	LtrL590_04:470,193..471,299(-)	368	1107	casein kinase I, putative	0	2	0.5	3	0	2	2.33333	0.5	6	0.5	6	1	4	5.33333	0.5	3	0.5	3	0.5	3	0.5	3	3	0.5	6	0.5	3	0.5	3	0.5	3	0.5	3	0.5	3	0.5	3	3.07143	0.5	3	3	2.33333	2.2619	2.33333	2.48214
LTRL590_030012800.1	LtrL590_03:286,855..287,109(-)	84	255	cytochrome c oxidase copper chaperone, putative	0	2	0	2	0	2	2	#DIV/0!	0	#DIV/0!	0	#DIV/0!	0	0	0	2	0	2	0	2	0.5	3	2.25	#DIV/0!	0	0	2	0	2	0	2	0	2	0	2	0	2	1.42857	0	2	-2	-2.25	-1.42857	-2	-1.91964
LTRL590_360077300.1	LtrL590_36:2,524,569..2,525,021(-)	150	453	hypothetical protein, conserved	0	1	0	1	0	1	1	#DIV/0!	0	#DIV/0!	0	#DIV/0!	0	0	#DIV/0!	0	#DIV/0!	0	#DIV/0!	0	0	1	0.25	#DIV/0!	0	0	1	0	1	0	1	0	1	0	1	0	1	0.714286	0	1	-1	-0.25	-0.714286	-1	-0.741071
LTRL590_360079300.1	LtrL590_36:2,582,579..2,583,160(-)	193	582	hypothetical protein, conserved	0	1	0	1	0	1	1	#DIV/0!	0	#DIV/0!	0	#DIV/0!	0	0	#DIV/0!	0	#DIV/0!	0	#DIV/0!	0	0	1	0.25	#DIV/0!	0	0	1	0	1	0	1	0	1	0	1	0	1	0.714286	0	1	-1	-0.25	-0.714286	-1	-0.741071
LTRL590_240026800.1	LtrL590_24:751,155..751,520(-)	121	366	hypothetical protein, conserved	0	1	0	1	#DIV/0!	0	0.666667	#DIV/0!	0	#DIV/0!	0	#DIV/0!	0	0	#DIV/0!	0	0	1	#DIV/0!	0	0	1	0.5	#DIV/0!	0	#DIV/0!	0	#DIV/0!	0	0	1	0	1	#DIV/0!	0	#DIV/0!	0	0.142857	0	1	-0.666667	-0.5	-0.142857	-1	-0.577381
LTRL590_250016200.1	LtrL590_25:382,919..383,407(+)	162	489	Complex 1 protein (LYR family), putative	1	2	1	2	0	1	1.66667	0	2	0	2	0	1	1.66667	0	2	0	2	0	1	0	2	1.75	0	2	0	2	0	2	0	2	0	2	0	2	0	2	1.71429	0	1	0	-0.0833333	-0.047619	0.666667	0.133929
LTRL590_080007700.1	LtrL590_08:92,700..93,041(+)	113	342	hypothetical protein, conserved	0	3	0	3	0	3	3	0	1	0	1	0	1	1	0	3	0	3	0	3	0	3	3	0	1	0	3	0	3	0	3	0	3	0	3	0	3	2.28571	0	3	-2	-2	-1.28571	-2	-1.82143
LTRL590_350006400.1	LtrL590_35:35,380..35,940(-)	186	561	ADP-ribosylation factor-like 2, arl2, putative	0	3	0	3	0	3	3	0	2	0	2	#DIV/0!	0	1.33333	0	3	0	3	0	3	0	3	3	0	2	0	3	0	2	0	3	0	3	0	3	0	3	2.28571	0	3	-1.66667	-1.66667	-0.952381	-1.66667	-1.4881
LTRL590_350030400.1	LtrL590_35:960,777..961,112(+)	111	336	Yos1-like, putative	4	5	4	5	4	5	5	#DIV/0!	1	#DIV/0!	1	#DIV/0!	1	1	4	5	4	5	4	5	4	5	5	#DIV/0!	1	4	5	4	5	4	5	4	5	4	5	4	5	4.28571	4	5	-4	-4	-3.28571	-4	-3.82143
LTRL590_030014800.1	LtrL590_03:374,478..375,134(-)	218	657	Got1/Sft2-like family, putative	0	4	0	4	0	4	4	0.5	3	0.5	3	1	4	3.33333	0	4	0	4	0	4	0	4	4	0.5	3	0	4	0	4	0	4	0	4	0	4	0	4	3.28571	0	4	-0.666667	-0.666667	0.047619	-0.666667	-0.488095
LTRL590_350015200.1	LtrL590_35:359,534..360,595(+)	353	1062	casein kinase, putative	0	4	0	4	0	4	4	0	4	0	4	0	3	3.66667	0	4	0	4	0	4	0	4	4	0	4	0	4	0	4	0	4	0	4	0	3	0	4	3.28571	0	4	-0.333333	-0.333333	0.380952	-0.333333	-0.154762
LTRL590_000009600.1	LTRL590_SCAF000036:38,708..39,577(-)	289	870	NADH-cytochrome b5 reductase, putative	0	1	0	1	0	1	1	0	1	0	1	0	2	1.33333	#DIV/0!	0	#DIV/0!	0	#DIV/0!	0	0	1	0.25	0	1	0	1	0	1	0	1	0	1	0	1	0	1	0.857143	0	1	0.333333	1.08333	0.47619	0.333333	0.556548
LTRL590_290037000.1	LtrL590_29:1,258,803..1,259,288(+)	161	486	40S ribosomal protein S19-like protein	0	1	0	1	0	1	1	0	2	0	2	0	1	1.66667	#DIV/0!	0	#DIV/0!	0	#DIV/0!	0	0	1	0.25	0	2	0	1	0	1	0	1	0	1	#DIV/0!	0	0	1	0.857143	0	1	0.666667	1.41667	0.809524	0.666667	0.889881
LTRL590_220007700.1	LtrL590_22:111,621..111,848(-)	75	228	Tim10/DDP family zinc finger containing protein, putative	0	1	0	1	0	1	1	0	1	0	1	#DIV/0!	0	0.666667	#DIV/0!	0	#DIV/0!	0	#DIV/0!	0	0	1	0.25	0	1	0	1	0	1	0	1	0	1	0	1	0	1	0.857143	0	1	-0.333333	0.416667	-0.190476	-0.333333	-0.110119
LTRL590_130008300.1	LtrL590_13:115,074..115,439(-)	121	366	Alba, putative	0	1	0	2	0	1	1.33333	#DIV/0!	0	#DIV/0!	0	0	4	1.33333	0	2	0	2	0	2	0	2	2	#DIV/0!	0	0	2	0	2	0	2	0	2	0	2	0	2	1.42857	0	2	0	-0.666667	-0.0952381	-0.666667	-0.357143
LTRL590_360041800.1	LtrL590_36:1,295,547..1,296,323(-)	258	777	14-3-3 protein-like protein	0	2	0	1	0	1	1.33333	0	2	0	2	0	1	1.66667	0	2	0	2	0	2	0	2	2	0	2	0	2	0	2	0	1	0	1	0	1	0	2	1.42857	0	2	0.333333	-0.333333	0.238095	-0.333333	-0.0238095
LTRL590_320010200.1	LtrL590_32:187,912..188,217(-)	101	306	hypothetical protein, conserved	0	1	0	2	0	1	1.33333	#DIV/0!	0	#DIV/0!	0	#DIV/0!	0	0	0	2	0	2	0	2	0	2	2	#DIV/0!	0	0	2	0	2	0	2	0	2	0	2	0	2	1.42857	0	2	-1.33333	-2	-1.42857	-2	-1.69048
LTRL590_330010900.1	LtrL590_33:165,633..166,241(-)	202	609	hypothetical protein, conserved	1	2	1	2	1	2	2	#DIV/0!	2	#DIV/0!	2	#DIV/0!	1	1.66667	2	3	2	3	2	3	#DIV/0!	1	2.5	#DIV/0!	2	2	3	2	3	2	3	2	3	2	3	2	3	2.71429	1	2	-0.333333	-0.833333	-1.04762	-0.333333	-0.636905
LTRL590_180021000.1	LtrL590_18:722,734..723,198(+)	154	465	Zinc finger, C3HC4 type (RING finger) containing protein, putative	1	2	0	1	0	1	1.33333	0.333333	4	0.333333	4	0.5	3	3.66667	1	2	1	2	1	2	1	2	2	0.333333	4	1	2	1	2	1	2	1	2	1	2	1	2	2.14286	1	2	2.33333	1.66667	1.52381	1.66667	1.79762
LTRL590_080005200.1	LtrL590_08:9,766..10,413(+)	215	648	Qc-SNARE protein, putative	0	1	0	2	0	2	1.66667	0	1	0	1	0	1	1	0	1	0	1	0	1	0	1	1	0	1	0	1	0	1	0	1	0	1	0	1	0	1	0.857143	0	1	-0.666667	0	0.142857	0	-0.130952
LTRL590_300038000.1	LtrL590_30:1,147,474..1,147,899(+)	141	426	hypothetical protein, conserved	#DIV/0!	0	#DIV/0!	0	0	1	0.333333	0	3	0	3	0	3	3	0	1	0	1	0	1	0	1	1	0	3	0	1	0	1	0	1	0	1	0	1	0	1	1.14286	0	1	2.66667	2	1.85714	2	2.13095
LTRL590_100015700.1	LtrL590_10:332,752..333,936(+)	394	1185	delta-12 fatty acid desaturase	0	5	0.2	6	0	4	5	0.25	5	0.25	5	0	3	4.33333	0.25	5	0.25	5	0.25	5	0.2	6	5.25	0.25	5	0.4	7	0.4	7	0.4	7	0.4	7	0.4	7	0.4	7	5.77143	0.25	5	-0.666667	-0.916667	-1.4381	-0.666667	-0.922024
LTRL590_280027900.1	LtrL590_28:849,639..850,235(-)	198	597	DPCD protein family, putative	2	3	2	3	2	3	3	#DIV/0!	1	#DIV/0!	1	1	2	1.33333	2	3	2	3	2	3	#DIV/0!	0	2.25	#DIV/0!	1	2	3	2	3	2	3	2	3	2	3	2	3	2.57143	2	3	-1.66667	-0.916667	-1.2381	-1.66667	-1.37202
LTRL590_030015400.1	LtrL590_03:386,511..387,752(-)	413	1242	eukaryotic initiation factor 2a, putative	0.166667	7	0.166667	7	0.142857	8	7.33333	0.111111	10	0.111111	10	0.142857	8	9.33333	0.166667	7	0.166667	7	0.166667	7	0.166667	7	7	0.111111	10	0.166667	7	0.166667	7	0.166667	7	0.166667	7	0.166667	7	0.166667	7	6.45238	0.166667	7	2	2.33333	2.88095	2.33333	2.3869
LTRL590_290035800.1	LtrL590_29:1,222,994..1,223,608(+)	204	615	hypothetical protein, conserved	0	1	0	1	0	1	1	1	2	1	2	1	2	2	#DIV/0!	0	#DIV/0!	0	#DIV/0!	0	0	1	0.25	1	2	0	1	0	1	0	1	0	1	0	1	0	1	1	0	1	1	1.75	1	1	1.1875
LTRL590_290036000.1	LtrL590_29:1,228,274..1,228,852(+)	192	579	hypothetical protein, conserved	0	1	0	1	0	1	1	1	2	1	2	1	2	2	#DIV/0!	0	#DIV/0!	0	#DIV/0!	0	0	1	0.25	1	2	0	1	0	1	0	1	0	1	0	1	0	1	1	0	1	1	1.75	1	1	1.1875
LTRL590_280016800.1	LtrL590_28:417,713..418,321(+)	202	609	carbohydrate kinase, thermoresistant glucokinase family, putative	1	4	0	3	0	2	3	0.5	6	0.5	6	0.25	5	5.66667	0	3	0	3	0	3	#DIV/0!	0	2.25	0.5	6	0	3	0	3	0	3	0	3	0	3	0	3	3	0	3	2.66667	3.41667	2.66667	2.66667	2.85417
LTRL590_350023300.1	LtrL590_35:650,488..651,486(+)	332	999	DTW domain containing protein, putative	1.33333	7	3	4	1.5	5	5.33333	0	2	0	2	#DIV/0!	2	2	4	5	4	5	4	5	4	5	5	0	2	4	5	4	5	4	5	4	5	4	5	4	5	4.42857	4	5	-3.33333	-3	-2.42857	-3	-2.94048
LTRL590_160021000.1	LtrL590_16:617,310..618,173(-)	287	864	EMG1/NEP1 methyltransferase, putative	#DIV/0!	0	#DIV/0!	0	0	2	0.666667	0	4	0	4	0.666667	5	4.33333	0	1	0	1	0	1	0	1	1	0	4	0	2	0	1	0	1	0	1	0	1	0	2	1.57143	0	1	3.66667	3.33333	2.7619	3.33333	3.27381
LTRL590_270019000.1	LtrL590_27:552,531..552,806(+)	91	276	hypothetical protein, conserved	0	2	0.5	3	0	2	2.33333	#DIV/0!	1	#DIV/0!	1	#DIV/0!	0	0.666667	0.5	3	0.5	3	0.5	3	0.5	3	3	#DIV/0!	1	0.5	3	0.5	3	0.5	3	0.5	3	0.5	3	0.5	3	2.35714	0.5	3	-1.66667	-2.33333	-1.69048	-2.33333	-2.00595
LTRL590_270006300.1	LtrL590_27:30,093..31,997(-)	634	1905	RING-variant domain containing protein, putative	0.285714	9	0.285714	9	0.222222	11	9.66667	3	8	3	8	3	8	8	0.375	11	0.428571	10	0.375	11	2	3	8.75	3	8	0.375	11	0.5	12	0.375	11	0.375	11	0.375	11	0.375	11	9.19643	0.285714	9	-1.66667	-0.75	-1.19643	-1	-1.15327
LTRL590_080014500.1	LtrL590_08:378,357..379,997(+)	546	1641	stress-induced protein sti1	0.25	5	0.333333	4	0.25	5	4.66667	0.333333	4	0.333333	4	0.5	6	4.66667	0.25	5	0.25	5	0.25	5	0.25	5	5	0.333333	4	0.25	5	0.25	5	0.25	5	0.25	5	0.25	5	0.25	5	4.17857	0.25	5	0	-0.333333	0.488095	-0.333333	-0.0446429
LTRL590_280020600.1	LtrL590_28:541,151..541,354(+)	67	204	hypothetical protein	2	3	2	3	2	3	3	#DIV/0!	0	#DIV/0!	0	#DIV/0!	1	0.333333	2	3	2	3	2	3	#DIV/0!	0	2.25	#DIV/0!	0	2	3	2	3	2	3	2	3	2	3	2	3	2.42857	2	3	-2.66667	-1.91667	-2.09524	-2.66667	-2.33631
LTRL590_280026000.1	LtrL590_28:770,754..770,966(-)	70	213	hypothetical protein	2	3	2	3	2	3	3	#DIV/0!	0	#DIV/0!	0	1	2	0.666667	2	3	2	3	2	3	#DIV/0!	0	2.25	#DIV/0!	0	2	3	2	3	2	3	2	3	2	3	2	3	2.42857	2	3	-2.33333	-1.58333	-1.7619	-2.33333	-2.00298
LTRL590_280035400.1	LtrL590_28:1,105,884..1,106,306(-)	106	321	Hsp70 protein, putative	1	2	1	2	1	2	2	#DIV/0!	0	#DIV/0!	0	0	1	0.333333	0	1	1	2	1	2	#DIV/0!	0	1.25	#DIV/0!	0	1	2	1	2	0	1	1	2	1	2	1	2	1.42857	1	2	-1.66667	-0.916667	-1.09524	-1.66667	-1.33631
LTRL590_260013900.1	LtrL590_26:268,244..268,759(-)	171	516	hypothetical protein, conserved	0	2	0.5	3	0	2	2.33333	0	1	0	1	#DIV/0!	1	1	0	2	0	2	0	2	#DIV/0!	0	1.5	0	1	0	2	0	2	0	2	0	2	0	2	0	2	1.57143	0	2	-1.33333	-0.5	-0.571429	-1	-0.85119
LTRL590_280014900.1	LtrL590_28:343,315..343,884(+)	189	570	hypothetical protein, conserved	0	3	0	2	0	2	2.33333	#DIV/0!	1	#DIV/0!	1	#DIV/0!	0	0.666667	0	2	0	2	0	2	#DIV/0!	0	1.5	#DIV/0!	1	0	2	0	2	0	2	0	2	0	2	0	2	1.57143	0	2	-1.66667	-0.833333	-0.904762	-1.33333	-1.18452
LTRL590_280026300.1	LtrL590_28:778,133..778,474(-)	113	342	Double-stranded DNA-binding domain containing protein, putative	2	3	1	2	1	2	2.33333	#DIV/0!	0	#DIV/0!	0	#DIV/0!	0	0	1	2	1	2	1	2	#DIV/0!	0	1.5	#DIV/0!	0	1	2	1	2	1	2	1	2	1	2	1	2	1.57143	1	2	-2.33333	-1.5	-1.57143	-2	-1.85119
LTRL590_200005500.1	LtrL590_20:15,475..15,951(-)	158	477	anti-silencing protein asf 1-like protein	0.5	3	0.5	3	0.5	3	3	#DIV/0!	0	#DIV/0!	0	#DIV/0!	0	0	0.5	3	0.5	3	0.5	3	0.5	3	3	#DIV/0!	0	0.5	3	0.5	3	0.5	3	0.5	3	0.5	3	0.5	3	2.21429	0.5	3	-3	-3	-2.21429	-3	-2.80357
LTRL590_000027700.1	LTRL590_SCAF000120:3,275..3,889(-)	204	615	vesicular protein trafficking mediator, putative	0	1	1	2	0	2	1.66667	1	2	1	2	0	1	1.66667	0	1	0	1	0	1	#DIV/0!	0	0.75	1	2	0	1	0	1	0	1	0	1	0	1	0	1	1	0	1	0	0.916667	0.666667	0.666667	0.5625
LTRL590_250013600.1	LtrL590_25:274,043..275,263(+)	406	1221	protein phosphatase, putative	0	5	0	5	0	6	5.33333	0.333333	4	0.333333	4	0	5	4.33333	0	6	0	6	0	5	0	6	5.75	0.333333	4	0	6	0	6	0	6	0	6	0	6	0	6	4.85714	0	5	-1	-1.41667	-0.52381	-0.666667	-0.901786
LTRL590_360055100.1	LtrL590_36:1,740,645..1,741,229(+)	194	585	hypothetical protein, conserved	0.25	5	0.333333	4	0.333333	4	4.33333	0.5	3	0.5	3	0	3	3	0.333333	4	0.333333	4	0.333333	4	0.333333	4	4	0.5	3	0.333333	4	0.333333	4	0.666667	5	0.333333	4	0.333333	4	0.333333	4	3.38095	0.333333	4	-1.33333	-1	-0.380952	-1	-0.928571
LTRL590_260009700.1	LtrL590_26:128,041..129,477(-)	478	1437	Leucine Rich Repeat/Leucine Rich repeat/Leucine rich repeat, putative	0.333333	8	0.75	7	0.333333	8	7.66667	0.285714	9	0.285714	9	0.285714	9	9	0.25	10	0.25	10	0.25	10	0	4	8.5	0.285714	9	0.25	10	0.25	10	0.25	10	0.25	10	0.25	10	0.25	10	8.46429	0.333333	8	1.33333	0.5	0.535714	1	0.842262
LTRL590_360081300.1	LtrL590_36:2,637,578..2,638,354(-)	258	777	ATP synthase delta (OSCP) subunit, putative	#DIV/0!	1	#DIV/0!	0	#DIV/0!	0	0.333333	0	4	0	4	0	2	3.33333	0	1	0	1	0	1	0	1	1	0	4	0	1	0	1	0	1	0	1	0	1	0	1	1.28571	0	1	3	2.33333	2.04762	2.33333	2.42857
LTRL590_270013100.1	LtrL590_27:303,321..303,923(+)	200	603	ras-related protein RAB1A, putative	0	2	0	1	0	2	1.66667	#DIV/0!	0	#DIV/0!	0	#DIV/0!	0	0	0	1	0	1	0	1	0	1	1	#DIV/0!	0	0	1	0	1	0	1	0	1	0	1	0	1	0.714286	0	1	-1.66667	-1	-0.714286	-1	-1.09524
LTRL590_320032400.1	LtrL590_32:996,591..997,079(-)	162	489	hypothetical protein, conserved	0	1	1	2	1	2	1.66667	#DIV/0!	0	#DIV/0!	0	#DIV/0!	0	0	0	1	0	1	0	1	0	1	1	#DIV/0!	0	0	1	0	1	0	1	0	1	0	1	0	1	0.714286	0	1	-1.66667	-1	-0.714286	-1	-1.09524
LTRL590_000013900.1	LTRL590_SCAF000076:1..372(+)	123	372	hypothetical protein	0	2	2	3	0	2	2.33333	2	3	3	4	#DIV/0!	1	2.66667	2	3	2	3	2	3	2	3	3	3	4	2	3	1	4	1	4	2	3	1	4	1	4	3.28571	2	3	0.333333	-0.333333	-0.619048	-0.333333	-0.238095
LTRL590_300028300.1	LtrL590_30:825,107..826,222(-)	371	1116	zinc-finger protein, conserved	0.5	3	0.5	3	0.333333	4	3.33333	2	9	2	9	3	4	7.33333	1	4	1	4	1	4	1	4	4	2	9	1	4	1	4	1	4	1	4	1	4	1	4	4.28571	1	4	4	3.33333	3.04762	3.33333	3.42857
LTRL590_090021400.1	LtrL590_09:542,899..543,318(-)	139	420	Bacterial trigger factor protein (TF) C-terminus, putative	0	1	0	1	0	1	1	0	3	0	3	0	2	2.66667	#DIV/0!	0	#DIV/0!	0	#DIV/0!	0	0	1	0.25	0	3	0	1	0	1	0	1	0	1	0	1	0	1	1.14286	0	1	1.66667	2.41667	1.52381	1.66667	1.81845
LTRL590_280017300.1	LtrL590_28:439,871..440,848(+)	325	978	electron-transfer-flavoprotein, alpha polypeptide, putative	2	3	#DIV/0!	3	#DIV/0!	3	3	0.333333	4	0.333333	4	0.333333	8	5.33333	3	4	3	4	3	4	0	1	3.25	0.333333	4	3	4	3	4	3	4	3	4	3	4	3	4	3.85714	2	3	2.33333	2.08333	1.47619	2.33333	2.05655
LTRL590_210005400.1	LtrL590_21:11,266..11,586(+)	106	321	ring-box protein 1, putative	#DIV/0!	0	#DIV/0!	0	#DIV/0!	0	0	0	1	0	1	0	1	1	#DIV/0!	0	#DIV/0!	0	#DIV/0!	0	0	1	0.25	0	1	0	1	0	1	0	1	0	1	0	1	0	1	0.857143	#DIV/0!	0	1	0.75	0.142857	1	0.723214
LTRL590_360069100.1	LtrL590_36:2,232,364..2,232,630(-)	88	267	phosphoprotein lepp12	0	1	0	1	0	1	1	0	3	0	3	0	1	2.33333	#DIV/0!	0	#DIV/0!	0	#DIV/0!	0	0	1	0.25	0	3	0	1	0	1	0	1	0	1	0	1	0	1	1.14286	0	1	1.33333	2.08333	1.19048	1.33333	1.48512
LTRL590_360062800.1	LtrL590_36:2,003,377..2,004,171(-)	264	795	Domain of unknown function (DUF4496), putative	0	1	0	1	0	1	1	#DIV/0!	2	#DIV/0!	2	2	3	2.33333	#DIV/0!	1	#DIV/0!	1	#DIV/0!	1	1	2	1.25	#DIV/0!	2	1	2	1	2	1	2	1	2	1	2	1	2	1.85714	0	1	1.33333	1.08333	0.47619	1.33333	1.05655
LTRL590_240025700.1	LtrL590_24:696,570..698,093(-)	507	1524	short chain dehydrogenase/reductase, putative	1	6	1	6	1.5	5	5.66667	1.5	5	1.5	5	1	6	5.33333	1	6	1	6	1	6	1	6	6	1.5	5	1	6	1	6	1	6	1	6	1	6	1	6	5.14286	1	6	-0.333333	-0.666667	0.190476	-0.666667	-0.369048
LTRL590_210013700.1	LtrL590_21:238,347..239,771(+)	474	1425	proteasome regulatory non-ATP-ase subunit 5, putative	0.333333	4	0	4	0	3	3.66667	0	2	0	2	0	4	2.66667	0	4	0	4	0	4	0	4	4	0	2	0	4	0	4	0	4	0	4	0	4	0	4	3.14286	0	4	-1	-1.33333	-0.47619	-1.33333	-1.03571
LTRL590_090014700.1	LtrL590_09:351,315..351,764(-)	149	450	calmodulin, putative	#DIV/0!	0	0	1	#DIV/0!	0	0.333333	0	2	0	2	0	1	1.66667	#DIV/0!	0	#DIV/0!	0	#DIV/0!	0	0	1	0.25	0	2	0	1	0	1	0	1	0	1	0	1	0	1	1	0	1	1.33333	1.41667	0.666667	0.666667	1.02083
LTRL590_280028300.1	LtrL590_28:859,053..859,489(-)	145	435	mitochondrial DEAD box protein, putative	0	2	0	2	0	1	1.66667	0	1	0	1	0	1	1	0	1	0	1	0	1	#DIV/0!	0	0.75	0	1	0	1	0	1	0	1	0	1	0	1	0	1	0.857143	0	1	-0.666667	0.25	0.142857	0	-0.0684524
LTRL590_260008400.1	LtrL590_26:95,460..96,263(-)	267	804	Regulator of Vps4 activity in the MVB pathway, putative	1	2	1	2	1	2	2	0	3	0	3	0.333333	4	3.33333	0.5	3	0.5	3	0.5	3	0	1	2.5	0	3	0.5	3	0.5	3	0.5	3	0.5	3	0.5	3	0.5	3	2.64286	0.5	3	1.33333	0.833333	0.690476	0.333333	0.797619
LTRL590_260031200.1	LtrL590_26:997,192..997,476(+)	94	285	hypothetical protein, conserved	2	3	3	4	3	4	3.66667	#DIV/0!	2	#DIV/0!	2	#DIV/0!	1	1.66667	3	4	3	4	3	4	3	4	4	#DIV/0!	2	3	4	3	4	3	4	3	4	3	4	3	4	3.57143	2	3	-2	-2.33333	-1.90476	-1.33333	-1.89286
LTRL590_320034700.1	LtrL590_32:1,081,826..1,082,230(-)	134	405	ribosomal protein L27, putative	0	3	0	1	0	1	1.66667	0	1	0	1	0	1	1	0	2	0	2	0	2	0	2	2	0	1	0	2	0	2	0	2	0	2	0	2	0	2	1.57143	0	1	-0.666667	-1	-0.571429	0	-0.559524
LTRL590_130016500.1	LtrL590_13:410,544..411,365(-)	273	822	40S ribosomal protein S4, putative	1	2	#DIV/0!	1	1	2	1.66667	#DIV/0!	0	#DIV/0!	0	#DIV/0!	0	0	1	2	1	2	1	2	1	2	2	#DIV/0!	0	1	2	1	2	1	2	1	2	1	2	1	2	1.57143	#DIV/0!	1	-1.66667	-2	-1.57143	-1	-1.55952
LTRL590_350016400.1	LtrL590_35:424,965..425,543(+)	193	579	oligosaccharyl transferase subunit, putative	2	3	1	2	1	2	2.33333	1	6	1	6	0.5	6	6	1	2	1	2	1	2	1	2	2	1	6	1	2	1	2	1	2	1	2	1	2	1	2	2.42857	0.5	3	3.66667	4	3.57143	3	3.55952
LTRL590_260031600.1	LtrL590_26:1,007,568..1,008,023(+)	151	456	hypothetical protein, conserved	0	3	0	3	0	3	3	0	1	0	1	0	1	1	0	3	0	3	0	3	0	4	3.25	0	1	0	3	0	3	0	3	0	3	0	3	0	3	2.28571	0	3	-2	-2.25	-1.28571	-2	-1.88393
LTRL590_260021600.1	LtrL590_26:595,181..596,167(+)	328	987	hypothetical protein, conserved	0.333333	4	0.5	3	0.5	3	3.33333	0.333333	4	0.333333	4	0	2	3.33333	0.333333	4	0.333333	4	0.333333	4	0.333333	4	4	0.333333	4	0.333333	4	0.333333	4	0.333333	4	0.333333	4	0.333333	4	0.333333	4	3.47619	0.5	3	0	-0.666667	-0.142857	0.333333	-0.119048
LTRL590_280031800.1	LtrL590_28:982,687..983,841(+)	384	1155	2-oxoglutarate dehydrogenase, E2 component, dihydrolipoamide succinyltransferase, putative	0	1	0	1	0	2	1.33333	0.333333	4	0.333333	4	0.5	3	3.66667	0	2	0	2	0	2	#DIV/0!	0	1.5	0.333333	4	0	2	0	2	0	2	0	2	0	2	0	2	2	0	1	2.33333	2.16667	1.66667	2.66667	2.20833
LTRL590_040013000.1	LtrL590_04:312,027..314,042(-)	671	2016	Pescadillo N-terminus/BRCA1 C Terminus (BRCT) domain containing protein, putative	0	2	0	2	0.5	3	2.33333	1	2	1	2	0.25	5	3	0.5	3	0.5	3	0.5	3	0.5	3	3	1	2	0.5	3	0.5	3	0.5	3	0.5	3	0.5	3	0.5	3	2.5	1	2	0.666667	0	0.5	1	0.541667
LTRL590_060016400.1	LtrL590_06:449,965..450,639(+)	224	675	Staphylococcal nuclease homologue, putative	1	2	0.5	3	1	2	2.33333	#DIV/0!	1	#DIV/0!	1	#DIV/0!	1	1	0.5	3	0.5	3	0.5	3	0.5	3	3	#DIV/0!	1	0.5	3	0.5	3	0.5	3	0.5	3	0.5	3	0.5	3	2.35714	1	2	-1.33333	-2	-1.35714	-1	-1.42262
LTRL590_210019300.1	LtrL590_21:470,301..471,212(-)	303	912	hypothetical protein, conserved	0.666667	5	0.5	6	0.5	6	5.66667	1.66667	8	1.66667	8	0.333333	4	6.66667	0.5	6	0.5	6	0.5	6	0.5	6	6	1.66667	8	0.5	6	0.75	7	0.5	6	0.5	6	0.5	6	0.5	6	5.64286	0.666667	5	1	0.666667	1.02381	1.66667	1.08929
LTRL590_060014100.1	LtrL590_06:379,233..379,754(+)	173	522	arginine N-methyltransferase, type III, putative	#DIV/0!	1	1	4	2	3	2.66667	0.5	3	0.5	3	0	1	2.33333	0.5	3	0.5	3	0.5	3	0.5	3	3	0.5	3	0.5	3	0.5	3	0.5	3	0.5	3	0.5	3	0.5	3	2.64286	1	2	-0.333333	-0.666667	-0.309524	0.333333	-0.244048
LTRL590_310035400.1	LtrL590_31:1,258,862..1,259,998(-)	378	1137	3'-nucleotidase/nuclease precursor, putative	#DIV/0!	0	#DIV/0!	0	#DIV/0!	0	0	1	2	1	2	1	2	2	0	1	0	1	#DIV/0!	0	#DIV/0!	0	0.5	1	2	#DIV/0!	0	0	1	0	1	1	2	#DIV/0!	0	0	1	0.857143	#DIV/0!	0	2	1.5	1.14286	2	1.66071
LTRL590_320013300.1	LtrL590_32:271,195..272,085(+)	296	891	cyclin 9, putative	0	3	0	4	0	3	3.33333	0.5	3	0.5	3	0.25	5	3.66667	0.333333	4	0.333333	4	0.333333	4	0.333333	4	4	0.5	3	0.333333	4	0.333333	4	0.333333	4	0.333333	4	0.333333	4	0.333333	4	3.33333	0	3	0.333333	-0.333333	0.333333	0.666667	0.25
LTRL590_270029300.1	LtrL590_27:976,685..977,404(-)	239	720	Thioredoxin, putative	0.5	3	0.333333	4	0.5	3	3.33333	0	3	0	3	0.333333	4	3.33333	0.333333	4	0.333333	4	0.333333	4	0.333333	4	4	0	3	0.333333	4	0.333333	4	0.333333	4	0.333333	4	0.333333	4	0.333333	4	3.33333	0	3	0	-0.666667	0	0.333333	-0.0833333
LTRL590_180005900.1	LtrL590_18:21,796..23,235(-)	479	1440	3-beta hydroxysteroid dehydrogenase/isomerase family, putative	0	4	0	4	0.5	6	4.66667	0	6	0	6	0	4	5.33333	0	5	0	5	0	5	0	5	5	0	6	0	5	0	5	0	5	0	5	0	5	0	5	4.42857	0	4	0.666667	0.333333	0.904762	1.33333	0.809524
LTRL590_060007900.1	LtrL590_06:97,072..97,767(-)	231	696	hypothetical protein, conserved	2	3	#DIV/0!	2	3	4	3	#DIV/0!	3	#DIV/0!	3	3	4	3.33333	3	4	3	4	3	4	#DIV/0!	3	3.75	#DIV/0!	3	3	4	3	4	3	4	3	4	3	4	3	4	3.71429	2	3	0.333333	-0.416667	-0.380952	0.333333	-0.0327381
LTRL590_320019400.1	LtrL590_32:511,178..511,462(+)	94	285	hypothetical protein	0	1	1	2	1	2	1.66667	#DIV/0!	1	#DIV/0!	1	#DIV/0!	1	1	1	2	1	2	1	2	1	2	2	#DIV/0!	1	1	2	1	2	1	2	1	2	1	2	1	2	1.71429	0	1	-0.666667	-1	-0.714286	0	-0.595238
LTRL590_320040800.1	LtrL590_32:1,307,816..1,309,093(+)	425	1278	dynein light intermediate chain, putative	4	5	2	6	2	6	5.66667	0.4	7	0.4	7	0	3	5.66667	2	6	2	6	2	6	2	6	6	0.4	7	2	6	2	6	3	4	2	6	2	6	2	6	5.71429	4	5	0	-0.333333	-0.047619	0.666667	0.0714286
LTRL590_080011600.1	LtrL590_08:245,764..246,195(+)	143	432	hypothetical protein, conserved	4	5	5	6	5	6	5.66667	4	5	4	5	0	1	3.66667	5	6	5	6	5	6	5	6	6	4	5	5	6	5	6	5	6	5	6	5	6	5	6	5.71429	4	5	-2	-2.33333	-2.04762	-1.33333	-1.92857
LTRL590_260030800.1	LtrL590_26:981,318..982,775(+)	485	1458	protein kinase, putative	0.5	3	0.5	3	0.333333	4	3.33333	0.666667	5	0.666667	5	1	4	4.66667	0.333333	4	0.333333	4	0.333333	4	0.333333	4	4	0.666667	5	0.333333	4	0.333333	4	0.333333	4	0.333333	4	0.333333	4	0.333333	4	3.61905	0	3	1.33333	0.666667	1.04762	1.66667	1.17857
LTRL590_250024900.1	LtrL590_25:711,070..711,990(-)	306	921	enoyl-CoA reductase, putative	0.5	3	0.5	3	0.5	3	3	0.5	3	0.5	3	0.5	3	3	1	4	1	4	#DIV/0!	1	1	4	3.25	0.5	3	1	4	1	4	1	4	1	4	1	4	1	4	3.42857	1	4	0	-0.25	-0.428571	-1	-0.419643
LTRL590_270011700.1	LtrL590_27:243,328..243,831(+)	167	504	hypothetical protein, conserved	0	1	0	1	0	1	1	0	1	0	1	0	2	1.33333	0	2	0	1	0	2	0	2	1.75	0	1	0	2	0	2	0	2	0	2	0	2	0	2	1.57143	0	2	0.333333	-0.416667	-0.238095	-0.666667	-0.247024
LTRL590_250026900.1	LtrL590_25:763,415..763,753(-)	112	339	acylphosphatase, putative	0	2	0	2	0	2	2	0.5	3	0.5	3	0	2	2.66667	0	3	0	3	0	2	0	3	2.75	0.5	3	0	3	0	3	0	3	0	3	0	3	0	3	2.57143	0	3	0.666667	-0.0833333	0.0952381	-0.333333	0.0863095
LTRL590_280012800.1	LtrL590_28:277,419..278,087(-)	222	669	hypothetical protein, conserved	0	3	0	3	0	3	3	0	2	0	2	0	1	1.66667	0	3	0	3	0	3	#DIV/0!	0	2.25	0	2	0	3	0	3	0	3	0	3	0	3	0	3	2.42857	0	2	-1.33333	-0.583333	-0.761905	-0.333333	-0.752976
LTRL590_350016700.1	LtrL590_35:435,569..436,128(+)	186	558	oligosaccharyl transferase subunit, putative	0	1	0	2	0.5	3	2	1	2	0.5	3	0.666667	5	3.33333	0	1	0	1	1	2	0	1	1.25	0.5	3	0	1	0	1	1	2	0	1	0	1	1	2	1.42857	0	1	1.33333	2.08333	1.90476	2.33333	1.91369
LTRL590_000020700.1	LTRL590_SCAF000112:2,479..4,458(-)	659	1980	folate/biopterin transporter, putative	0.833333	11	1.125	17	0.857143	13	13.6667	1.75	11	1.75	11	1	8	10	0.75	14	0.75	14	0.555556	14	0.555556	14	14	1.75	11	0.7	17	0.6	16	0.545455	17	0.636364	18	0.666667	15	0.6	16	13.3636	0.857143	13	-3.66667	-4	-3.36364	-3	-3.50758
LTRL590_340014300.1	LtrL590_34:373,855..374,334(+)	159	480	DNA-directed RNA polymerase III subunit, putative	#DIV/0!	0	#DIV/0!	0	0	1	0.333333	0	2	0	2	0	1	1.66667	#DIV/0!	0	#DIV/0!	0	#DIV/0!	0	0	1	0.25	0	2	0	1	0	1	0	1	0	1	0	1	0	1	1	#DIV/0!	0	1.33333	1.41667	0.666667	1.66667	1.27083
LTRL590_290015700.1	LtrL590_29:368,162..369,181(+)	339	1020	signal peptide peptidase, putative	#DIV/0!	1	0.5	3	1	2	2	1	2	#DIV/0!	0	0	2	1.33333	0.333333	4	#DIV/0!	0	#DIV/0!	1	1	2	1.75	#DIV/0!	0	#DIV/0!	0	0.333333	4	0.5	3	0.333333	4	#DIV/0!	0	1	2	1.5	#DIV/0!	1	-0.666667	-0.416667	-0.166667	0.333333	-0.229167
LTRL590_050005800.1	LtrL590_05:24,794..25,333(+)	179	540	NUDIX hydrolase dihydroneopterin triphosphate pyrophosphohydrolase/hydrolase, putative	1	2	0.5	3	2	3	2.66667	#DIV/0!	1	#DIV/0!	1	#DIV/0!	2	1.33333	0.5	3	0.5	3	0.5	3	0.5	3	3	#DIV/0!	1	0.5	3	0.5	3	0.5	3	0.5	3	0.5	3	0.5	3	2.35714	1	2	-1.33333	-1.66667	-1.02381	-0.666667	-1.17262
LTRL590_290014900.1	LtrL590_29:344,852..345,358(-)	168	507	Cytochrome b5-like Heme/Steroid binding domain containing protein, putative	#DIV/0!	2	2	3	0.5	3	2.66667	#DIV/0!	1	#DIV/0!	1	#DIV/0!	2	1.33333	0.5	3	0.5	3	0.5	3	0.5	3	3	#DIV/0!	1	0.5	3	0.5	3	0.5	3	0.5	3	0.5	3	0.5	3	2.35714	1	2	-1.33333	-1.66667	-1.02381	-0.666667	-1.17262
LTRL590_080007600.1	LtrL590_08:90,930..91,718(+)	262	789	Ribosomal protein L9, N-terminal domain containing protein, putative	0	5	0	5	0	5	5	0	4	0	4	0	3	3.66667	0	5	0	5	0	5	0	5	5	0	4	0	5	0	5	0	5	0	5	0	5	0	5	4.14286	0	5	-1.33333	-1.33333	-0.47619	-1.33333	-1.11905
LTRL590_030012100.1	LtrL590_03:258,532..259,392(+)	286	861	Uroporphyrinogen-III synthase HemD, putative	1	4	1	4	1	4	4	1	12	1	12	0.5	3	9	1	4	1	4	1	4	1	4	4	1	12	1	4	0.666667	5	1	4	1	4	1	4	1	4	4.85714	1	4	5	5	4.14286	5	4.78571
LTRL590_200017800.1	LtrL590_20:529,075..531,138(+)	687	2064	cysteine peptidase, Clan CA, family C2, putative	0	5	0	4	0	3	4	0	3	0	2	0	3	2.66667	0	4	0	4	0	4	0	4	4	0	2	0	4	0	4	0	4	0	4	0	4	0	4	3.14286	0	4	-1.33333	-1.33333	-0.47619	-1.33333	-1.11905
LTRL590_080011300.1	LtrL590_08:235,592..236,308(+)	238	717	hypothetical protein, conserved	2	6	2	6	2	6	6	1	4	1	4	1	4	4	2	6	2	6	2	6	2	6	6	1	4	2	6	2	6	2	6	2	6	2	6	2	6	5.14286	2	6	-2	-2	-1.14286	-2	-1.78571
LTRL590_350031600.1	LtrL590_35:986,731..986,949(-)	72	219	hypothetical protein	1	4	1	4	1	4	4	0	1	0	1	0	1	1	1	4	1	4	1	4	1	4	4	0	1	1	4	1	4	1	4	1	4	1	4	1	4	3.14286	1	4	-3	-3	-2.14286	-3	-2.78571
LTRL590_280038000.1	LtrL590_28:1,186,252..1,187,412(-)	386	1161	protein kinase, putative	0	5	0	5	0.2	6	5.33333	2	6	2	6	2	3	5	0.2	6	0.2	6	0.2	6	#DIV/0!	0	4.5	2	6	0	5	0	5	0	2	0	5	0	5	0	5	4.42857	0	5	-0.333333	0.5	0.571429	0	0.184524
LTRL590_330027000.1	LtrL590_33:758,897..759,148(+)	83	252	60S ribosomal protein L37	#DIV/0!	0	#DIV/0!	0	#DIV/0!	0	0	#DIV/0!	0	#DIV/0!	0	#DIV/0!	0	0	0	1	#DIV/0!	0	0	1	0	1	0.75	#DIV/0!	0	0	1	0	1	0	1	0	1	0	1	0	1	0.714286	0	1	0	-0.75	-0.714286	-1	-0.616071
LTRL590_280011600.1	LtrL590_28:246,237..246,443(-)	68	207	ATP synthase subunit H, putative	#DIV/0!	0	#DIV/0!	0	#DIV/0!	0	0	#DIV/0!	0	#DIV/0!	0	1	2	0.666667	0	1	0	1	0	1	#DIV/0!	0	0.75	#DIV/0!	0	0	1	0	1	0	1	0	1	0	1	0	1	0.714286	0	1	0.666667	-0.0833333	-0.047619	-0.333333	0.0505952
LTRL590_260008700.1	LtrL590_26:101,584..101,886(-)	100	303	hypothetical protein, conserved	0	1	0	1	0	1	1	1	2	1	2	1	2	2	0	2	0	2	0	2	0	1	1.75	1	2	0	2	0	2	0	2	0	2	0	2	0	2	1.71429	0	2	1	0.25	0.285714	0	0.383929
LTRL590_280027800.1	LtrL590_28:847,980..848,501(-)	173	522	NADH dehydrogenase subunit NB6M, putative	0	3	0	3	0	3	3	0	1	0	1	0	1	1	0	3	0	3	0	3	#DIV/0!	0	2.25	0	1	0	3	0	3	0	3	0	3	0	3	0	3	2.28571	0	2	-2	-1.25	-1.28571	-1	-1.38393
LTRL590_260012700.1	LtrL590_26:230,003..230,401(-)	132	399	hypothetical protein, conserved	0	2	0	2	0	2	2	0	1	0	1	0	1	1	0	3	0	3	0	3	#DIV/0!	0	2.25	0	1	0	3	0	3	0	3	0	3	0	3	0	3	2.28571	0	3	-1	-1.25	-1.28571	-2	-1.38393
LTRL590_150011100.1	LtrL590_15:225,859..226,554(+)	231	696	hypothetical protein, conserved	1	4	0	2	0	2	2.66667	1	4	1	4	4	5	4.33333	0.5	3	0.5	3	0.5	3	0.5	3	3	1	4	0.5	3	0.5	3	0.5	3	0.5	3	0.5	3	0.5	3	2.78571	1	2	1.66667	1.33333	1.54762	2.33333	1.72024
LTRL590_260007000.1	LtrL590_26:52,087..52,635(-)	182	549	Eukaryotic translation initiation factor 4E type 6, putative	#DIV/0!	1	#DIV/0!	1	#DIV/0!	1	1	0	1	0	1	0	1	1	1	2	1	2	1	2	0	1	1.75	0	1	1	2	1	2	1	2	#DIV/0!	1	#DIV/0!	1	1	2	1.42857	1	2	0	-0.75	-0.428571	-1	-0.544643
LTRL590_270006600.1	LtrL590_27:37,518..38,174(-)	218	657	zinc finger containing protein, putative	0	2	0	2	0	2	2	0	2	0	2	0.5	3	2.33333	0	3	0	2	0	3	0	3	2.75	0	2	0	3	0	3	0	3	0	3	0	3	0	3	2.42857	0	3	0.333333	-0.416667	-0.0952381	-0.666667	-0.21131
LTRL590_280013700.1	LtrL590_28:297,878..298,306(+)	142	429	RNA binding protein rbp16, putative	0	1	0	1	0	1	1	#DIV/0!	0	#DIV/0!	0	#DIV/0!	0	0	0	1	0	1	0	1	#DIV/0!	0	0.75	#DIV/0!	0	#DIV/0!	0	0	1	0	1	0	1	0	1	#DIV/0!	0	0.428571	#DIV/0!	0	-1	-0.75	-0.428571	0	-0.544643
LTRL590_340019600.1	LtrL590_34:552,394..553,470(-)	358	1077	PTP1-interacting protein, 39 kDa, putative	1.5	5	1	6	1	6	5.66667	0.5	6	0.5	6	1	4	5.33333	1.5	5	1.5	5	1.5	5	1.33333	7	5.5	0.5	6	1.33333	7	1.33333	7	1.33333	7	1.33333	7	1.33333	7	1.33333	7	6.04762	1.5	5	-0.333333	-0.166667	-0.714286	0.333333	-0.220238
LTRL590_280037300.1	LtrL590_28:1,179,114..1,179,380(-)	88	267	hypothetical protein	0.5	3	0.5	3	0.5	3	3	0.666667	5	0.666667	5	0	2	4	0.333333	4	0.333333	4	0.333333	4	0	1	3.25	0.666667	5	0.333333	4	0.333333	4	0.333333	4	0.333333	4	0.333333	4	0.333333	4	3.61905	0.333333	4	1	0.75	0.380952	0	0.532738
LTRL590_320027600.1	LtrL590_32:814,069..814,344(-)	91	276	hypothetical protein, conserved	#DIV/0!	3	3	4	3	4	3.66667	#DIV/0!	0	#DIV/0!	0	0	1	0.333333	3	4	3	4	3	4	3	4	4	#DIV/0!	0	3	4	3	4	3	4	3	4	3	4	3	4	3.28571	#DIV/0!	3	-3.33333	-3.66667	-2.95238	-2.66667	-3.15476
LTRL590_040011200.1	LtrL590_04:250,391..250,573(-)	60	183	hypothetical protein	2	3	1	4	1	4	3.66667	#DIV/0!	2	#DIV/0!	2	1	2	2	1	4	1	4	1	4	1	4	4	#DIV/0!	2	1	4	1	4	1	4	1	4	1	4	1	4	3.28571	2	3	-1.66667	-2	-1.28571	-1	-1.4881
LTRL590_030006700.1	LtrL590_03:45,943..46,575(+)	210	633	U2 splicing auxiliary factor, putative	0	2	0	3	0	3	2.66667	0	1	0	1	0	2	1.33333	0	3	0	3	0	3	0	3	3	0	1	0	3	0	3	0	3	0	3	0	3	0	3	2.28571	0	2	-1.33333	-1.66667	-0.952381	-0.666667	-1.15476
LTRL590_130016900.1	LtrL590_13:418,563..419,015(-)	150	453	hypothetical protein, conserved	4	5	2	6	2	6	5.66667	1.5	5	1.5	5	3	4	4.66667	2	6	2	6	2	6	2	6	6	1.5	5	2	6	2	6	2	6	2	6	2	6	2	6	5.28571	4	5	-1	-1.33333	-0.619048	-0.333333	-0.821429
LTRL590_220020300.1	LtrL590_22:593,925..595,016(+)	363	1092	hypothetical protein, conserved	2	3	1	4	2	3	3.33333	0.25	5	0.25	5	0.5	6	5.33333	1	4	1	4	1	4	1	4	4	0.25	5	1	4	1	4	1	4	1	4	1	4	1	4	3.71429	2	3	2	1.33333	1.61905	2.33333	1.82143
LTRL590_240025800.1	LtrL590_24:698,981..699,703(-)	240	723	hypothetical protein, conserved	5	6	2.5	7	2.5	7	6.66667	4	5	4	5	2	6	5.33333	2.5	7	2.5	7	2.5	7	2.5	7	7	4	5	2.5	7	2.5	7	2.5	7	2.5	7	2.5	7	2.5	7	6.07143	2.5	7	-1.33333	-1.66667	-0.738095	-1.66667	-1.35119
LTRL590_340013000.1	LtrL590_34:321,366..322,853(+)	495	1488	hypothetical protein, conserved	0.666667	5	1	4	1.5	5	4.66667	0.333333	8	0.333333	8	0.6	8	8	1.5	5	1.5	5	1.5	5	1	6	5.25	0.333333	8	1	6	0.75	7	1	6	1	6	1	6	1	6	5.71429	1.5	5	3.33333	2.75	2.28571	3	2.84226
LTRL590_080011500.1	LtrL590_08:240,636..240,932(+)	98	297	hypothetical protein	0.666667	5	1	4	1	4	4.33333	#DIV/0!	2	#DIV/0!	2	#DIV/0!	2	2	1	4	1	4	1	4	1	4	4	#DIV/0!	2	1	4	1	4	1	4	1	4	1	4	1	4	3.28571	1	4	-2.33333	-2	-1.28571	-2	-1.90476
LTRL590_230026900.1	LtrL590_23:768,157..769,176(+)	339	1020	hypothetical protein, conserved	2	6	2	6	1.33333	7	6.33333	1.5	5	1.5	5	0.666667	5	5	2	6	2	6	2	6	2	6	6	1.5	5	2	6	2	6	2	6	2	6	2	6	2	6	5.28571	2	6	-1.33333	-1	-0.285714	-1	-0.904762
LTRL590_350014800.1	LtrL590_35:344,339..345,454(+)	371	1116	aldose 1-epimerase-like protein	1	6	1	6	0.75	7	6.33333	2	6	2	6	2	6	6	1	6	1	6	1	6	1	6	6	2	6	1	6	1	6	1	6	1	6	1	6	1	6	5.28571	1	6	-0.333333	0	0.714286	0	0.0952381
LTRL590_320010800.1	LtrL590_32:199,679..200,116(+)	145	438	hypothetical protein, conserved	0	2	0	1	0	2	1.66667	0	3	0	3	0	2	2.66667	0	2	0	2	0	2	0	2	2	0	3	0	2	0	2	0	2	0	2	0	2	0	2	1.85714	0	1	1	0.666667	0.809524	1.66667	1.03571
LTRL590_040014000.1	LtrL590_04:354,643..355,377(-)	244	735	hypothetical protein, conserved	0	1	0	1	#DIV/0!	0	0.666667	#DIV/0!	1	#DIV/0!	1	0.333333	4	2	0	1	0	1	0	1	0	1	1	#DIV/0!	1	0	1	0	1	0	1	0	1	0	1	0	1	0.857143	#DIV/0!	0	1.33333	1	1.14286	2	1.36905
LTRL590_320044800.1	LtrL590_32:1,450,590..1,451,861(+)	423	1272	hypothetical protein, conserved	0.4	7	0.4	7	0.333333	8	7.33333	1.25	9	1.25	9	1.25	9	9	1	8	1	8	1	8	1	8	8	1.25	9	1	8	1	8	1	8	1	8	1	8	1	8	7.14286	0.75	7	1.66667	1	1.85714	2	1.63095
LTRL590_000014700.1	LTRL590_SCAF000082:1,669..1,965(-)	98	297	hypothetical protein, conserved	0	1	#DIV/0!	0	#DIV/0!	0	0.333333	#DIV/0!	0	#DIV/0!	0	#DIV/0!	0	0	#DIV/0!	0	#DIV/0!	0	#DIV/0!	0	#DIV/0!	0	0	#DIV/0!	0	#DIV/0!	0	#DIV/0!	0	0	1	0	1	#DIV/0!	0	#DIV/0!	0	0.142857	0	1	-0.333333	0	-0.142857	-1	-0.369048
LTRL590_190008900.1	LtrL590_19:166,471..166,926(+)	151	456	DNA-directed RNA polymerase III subunit C11, putative	0	1	0	1	#DIV/0!	0	0.666667	0	1	0	1	#DIV/0!	0	0.666667	0	1	0	1	0	1	0	1	1	0	1	0	1	0	1	0	1	0	1	0	1	0	1	0.857143	#DIV/0!	0	0	-0.333333	-0.190476	0.666667	0.0357143
LTRL590_130019500.1	LtrL590_13:529,516..529,992(-)	158	477	Ran-binding protein 1, putative	0	3	0	2	0	2	2.33333	0	3	0	3	0	3	3	0	4	0	2	0	4	0	2	3	0	3	0	2	0	2	0	4	0	2	0	4	0	2	2.14286	0	2	0.666667	0	0.857143	1	0.630952
LTRL590_320037900.1	LtrL590_32:1,199,321..1,199,854(+)	177	534	hypothetical protein	2	3	1	4	2	3	3.33333	0	1	0	1	0	1	1	1	4	1	4	1	4	1	4	4	0	1	1	4	1	4	1	4	1	4	1	4	1	4	3.14286	2	3	-2.33333	-3	-2.14286	-2	-2.36905
LTRL590_340034700.1	LtrL590_34:1,161,420..1,162,451(+)	343	1032	Nucleoside diphosphate kinase, putative	1	4	1	4	2	3	3.66667	3	4	3	4	1.5	5	4.33333	2	3	2	3	2	3	3	4	3.25	3	4	3	4	4	5	3	4	3	4	3	4	3	4	4	2	3	0.666667	1.08333	0.333333	1.33333	0.854167
LTRL590_100009400.1	LtrL590_10:178,149..178,739(-)	196	591	Ribosome biogenesis protein Nop16, putative	0	2	0	1	0	2	1.66667	0	4	0	4	0	1	3	0	1	0	1	0	1	0	2	1.25	0	4	0	2	0	2	0	2	0	2	0	2	0	2	2	0	1	1.33333	1.75	1	2	1.52083
LTRL590_290036900.1	LtrL590_29:1,257,924..1,258,292(+)	122	369	hypothetical protein, conserved	0	1	0	1	0	1	1	1	4	1	4	1	2	3.33333	#DIV/0!	0	#DIV/0!	0	#DIV/0!	0	0	1	0.25	1	4	0	1	0	1	0	1	0	1	0	1	0	1	1.28571	0	1	2.33333	3.08333	2.04762	2.33333	2.4494
LTRL590_220021600.1	LtrL590_22:648,541..649,584(+)	347	1044	phospholipase c-like protein	1	4	0.666667	5	0.666667	5	4.66667	1	4	1	4	#DIV/0!	2	3.33333	0.666667	5	0.666667	5	0.666667	5	0.666667	5	5	1	4	0.666667	5	0.666667	5	0.666667	5	0.666667	5	0.666667	5	0.666667	5	4.2381	1	4	-1.33333	-1.66667	-0.904762	-0.666667	-1.14286
LTRL590_270010800.1	LtrL590_27:216,707..217,690(+)	327	984	cdc2-related kinase, putative	1	2	#DIV/0!	2	1	2	2	#DIV/0!	2	#DIV/0!	2	0.5	3	2.33333	1	2	#DIV/0!	0	1	2	1	2	1.5	#DIV/0!	2	1	2	1	2	1	2	1	2	1	2	1	2	1.85714	0	1	0.333333	0.833333	0.47619	1.33333	0.744048
LTRL590_280007100.1	LtrL590_28:65,032..65,460(+)	142	429	histone H2B variant	1	2	1	2	1	2	2	1	2	1	2	#DIV/0!	1	1.66667	1	2	1	2	1	2	#DIV/0!	0	1.5	1	2	1	2	1	2	1	2	1	2	1	2	1	2	1.85714	0	1	-0.333333	0.166667	-0.190476	0.666667	0.077381
LTRL590_360021900.1	LtrL590_36:590,828..591,013(-)	61	186	hypothetical protein	0	1	0	1	0	1	1	#DIV/0!	2	#DIV/0!	2	#DIV/0!	1	1.66667	0	1	0	1	#DIV/0!	0	0	1	0.75	#DIV/0!	2	0	1	0	1	0	1	0	1	#DIV/0!	0	0	1	0.857143	#DIV/0!	0	0.666667	0.916667	0.809524	1.66667	1.01488
LTRL590_250028200.1	LtrL590_25:807,456..807,926(-)	156	471	hypothetical protein, conserved	0	1	0	1	0	1	1	0	1	0	1	#DIV/0!	0	0.666667	0	1	0	1	#DIV/0!	0	0	1	0.75	0	1	0	1	0	1	0	1	0	1	0	1	0	1	0.857143	#DIV/0!	0	-0.333333	-0.0833333	-0.190476	0.666667	0.014881
LTRL590_280015300.1	LtrL590_28:353,395..353,829(+)	144	435	40S ribosomal protein S14	0	1	0	1	0	1	1	0	1	0	1	#DIV/0!	0	0.666667	0	1	0	1	0	1	#DIV/0!	0	0.75	0	1	0	1	0	1	0	1	0	1	0	1	0	1	0.857143	#DIV/0!	0	-0.333333	-0.0833333	-0.190476	0.666667	0.014881
LTRL590_280013400.1	LtrL590_28:292,069..292,518(+)	149	450	RNA polymerase B subunit RPB8, putative	0	1	0	1	0	1	1	0	3	0	3	0	1	2.33333	0	2	0	2	0	2	0	1	1.75	0	3	0	2	0	2	0	2	0	2	0	2	0	2	1.85714	0	2	1.33333	0.583333	0.47619	0.333333	0.681548
LTRL590_280010400.1	LtrL590_28:191,503..191,841(-)	112	339	ribosomal protein S26, putative	0	3	0	3	0	3	3	0	1	0	1	#DIV/0!	0	0.666667	0	3	0	3	0	3	#DIV/0!	0	2.25	0	1	0	3	0	3	0	3	0	3	0	2	0	3	2.14286	0	2	-2.33333	-1.58333	-1.47619	-1.33333	-1.68155
LTRL590_240025400.1	LtrL590_24:691,362..692,081(-)	239	720	RNA recognition motif. (a.k.a. RRM, RBD, or RNP domain), putative	1.5	5	1.5	5	1	6	5.33333	1.5	5	1.5	5	2	3	4.33333	1	6	1	6	1	6	1	6	6	1.5	5	1	6	1	6	1	6	1	6	1	6	1	6	5.14286	1	6	-1	-1.66667	-0.809524	-1.66667	-1.28571
LTRL590_220015500.1	LtrL590_22:418,481..419,782(+)	433	1302	adaptor complex AP-1 medium subunit, putative	0	5	0	6	0	5	5.33333	1	6	1	6	1.5	5	5.66667	0	6	0	6	0	6	0	6	6	1	6	0	6	0	6	0	6	0	6	0	6	0	6	5.14286	0	6	0.333333	-0.333333	0.52381	-0.333333	0.047619
LTRL590_280013100.1	LtrL590_28:286,267..287,634(+)	455	1368	RNA polymerase I	0.5	6	0.666667	5	0.666667	5	5.33333	0.25	10	0.25	10	0.5	6	8.66667	0.5	6	0.5	6	0.5	6	0	1	4.75	0.25	10	0.5	6	0.5	6	0.5	6	0.5	6	0.5	6	0.5	6	5.78571	0.666667	5	3.33333	3.91667	2.88095	3.66667	3.4494
LTRL590_350018200.1	LtrL590_35:475,028..475,777(+)	249	750	hypothetical protein, conserved	1	4	0.5	3	0.333333	4	3.66667	0	1	0	1	0	1	1	0.333333	4	0.333333	4	0.333333	4	0.333333	4	4	0	1	0.333333	4	0.333333	4	0.333333	4	0.333333	4	0.333333	4	0.333333	4	3.04762	0.333333	4	-2.66667	-3	-2.04762	-3	-2.67857
LTRL590_320033900.1	LtrL590_32:1,045,177..1,046,076(-)	299	900	superoxide dismutase, putative	0.5	3	1	2	1	2	2.33333	0.333333	4	0.333333	4	0.333333	4	4	0.5	3	0.5	3	0.5	3	0.5	3	3	0.333333	4	0.5	3	0.5	3	0.5	3	0.5	3	0.5	3	0.5	3	2.78571	1	2	1.66667	1	1.21429	2	1.47024
LTRL590_080012700.1	LtrL590_08:308,315..308,509(-)	64	195	hypothetical protein	1	2	0.5	3	0.5	3	2.66667	#DIV/0!	0	#DIV/0!	0	#DIV/0!	0	0	0.5	3	0.5	3	0.5	3	0.5	3	3	#DIV/0!	0	0.5	3	0.5	3	0.5	3	0.5	3	0.5	3	0.5	3	2.21429	1	2	-2.66667	-3	-2.21429	-2	-2.47024
LTRL590_350010200.1	LtrL590_35:161,285..161,785(+)	166	501	Leucine Rich Repeat, putative	1.33333	7	1.33333	7	1.33333	7	7	0.25	5	0.25	5	3	4	4.66667	1.33333	7	1.33333	7	1	6	1.33333	7	6.75	0.25	5	1.33333	7	1	8	1.33333	7	1.33333	7	1.33333	7	1.33333	7	6.04762	1.33333	7	-2.33333	-2.08333	-1.38095	-2.33333	-2.03274
LTRL590_360078600.1	LtrL590_36:2,562,775..2,563,206(-)	143	432	hypothetical protein, conserved	0	1	0	1	0	1	1	0	2	0	2	0	1	1.66667	0	1	0	1	0	1	0	2	1.25	0	2	0	2	0	2	0	2	0	2	0	2	0	2	1.71429	0	2	0.666667	0.416667	-0.047619	-0.333333	0.175595
LTRL590_220009500.1	LtrL590_22:172,985..173,443(-)	152	459	40S ribosomal protein S15, putative	#DIV/0!	0	#DIV/0!	0	#DIV/0!	0	0	#DIV/0!	0	#DIV/0!	0	0	2	0.666667	#DIV/0!	0	#DIV/0!	0	#DIV/0!	0	0	1	0.25	#DIV/0!	0	0	1	0	1	0	1	0	1	0	1	0	1	0.714286	0	1	0.666667	0.416667	-0.047619	-0.333333	0.175595
LTRL590_290032300.1	LtrL590_29:1,116,948..1,117,415(+)	155	468	heat shock protein 20, putative	0	1	0	1	0	1	1	1	2	1	2	0	2	2	0	1	0	1	0	1	0	2	1.25	1	2	0	2	0	2	0	2	0	2	0	2	0	2	1.71429	0	2	1	0.75	0.285714	0	0.508929
LTRL590_080008400.1	LtrL590_08:111,564..112,241(+)	225	678	mitochondrial associated ribonuclease, putative	0.666667	5	0.666667	5	0.666667	5	5	0.5	3	0.5	3	1	4	3.33333	0.666667	5	0.666667	5	0.666667	5	0.666667	5	5	0.5	3	0.666667	5	0.666667	5	0.666667	5	0.666667	5	0.666667	5	0.666667	5	4.09524	0.666667	5	-1.66667	-1.66667	-0.761905	-1.66667	-1.44048
LTRL590_150015900.1	LtrL590_15:414,643..415,302(-)	219	660	40S ribosomal protein S3, putative	#DIV/0!	0	0	1	#DIV/0!	0	0.333333	0	2	0	2	0	3	2.33333	#DIV/0!	0	0	1	0	1	0	2	1	0	2	0	2	0	2	0	1	0	2	#DIV/0!	0	0	2	1.42857	0	1	2	1.33333	0.904762	1.33333	1.39286
LTRL590_310037500.1	LtrL590_31:1,351,997..1,352,191(-)	64	195	hypothetical protein	#DIV/0!	0	#DIV/0!	1	#DIV/0!	0	0.333333	0.666667	5	0.666667	5	0	2	4	0	1	0	1	0	1	0	1	1	0.666667	5	0	1	0	1	0	1	0	1	0	1	0	1	1.42857	0	1	3.66667	3	2.57143	3	3.05952
LTRL590_170005500.1	LtrL590_17:11,784..12,584(-)	266	801	DnaJ domain containing protein, putative	0.333333	4	#DIV/0!	0	0.333333	4	2.66667	0.666667	5	0.666667	5	0.666667	5	5	0.5	3	0.5	3	0.5	3	0.5	3	3	0.666667	5	0.5	3	0.5	3	0.5	3	0.5	3	0.5	3	0.5	3	2.92857	1	2	2.33333	2	2.07143	3	2.35119
LTRL590_220012400.1	LtrL590_22:277,285..278,124(+)	279	840	Ribosomal protein L22p/L17e, putative	0	1	0	2	0	1	1.33333	0	1	0	2	0	1	1.33333	#DIV/0!	0	#DIV/0!	0	#DIV/0!	0	0	1	0.25	0	2	0	1	0	1	0	1	0	1	0	1	0	1	1	0	1	0	1.08333	0.333333	0.333333	0.4375
LTRL590_050013300.1	LtrL590_05:329,774..330,391(+)	205	618	hypothetical protein, conserved	0	1	0	2	0	2	1.66667	#DIV/0!	1	#DIV/0!	1	#DIV/0!	1	1	0	3	0	3	0	3	0	2	2.75	#DIV/0!	1	0	3	0	3	0	3	0	3	0	3	0	3	2.28571	0	2	-0.666667	-1.75	-1.28571	-1	-1.1756
LTRL590_250026100.1	LtrL590_25:746,714..747,133(-)	139	420	Vacuolar protein sorting 55, putative	0.5	3	0.333333	4	0.5	3	3.33333	0	1	0	1	0	1	1	0.333333	4	0.333333	4	#DIV/0!	0	0.333333	4	3	0	1	0.333333	4	0.333333	4	0.333333	4	0.333333	4	0.333333	4	0.333333	4	3.04762	0.333333	4	-2.33333	-2	-2.04762	-3	-2.34524
LTRL590_250024700.1	LtrL590_25:700,891..701,319(-)	142	429	Domain of unknown function (DUF1935), putative	0.5	3	0.5	3	0.5	3	3	0	1	0	1	0	1	1	0.333333	4	0.333333	4	0	1	0.333333	4	3.25	0	1	0.333333	4	0.333333	4	0.333333	4	0.333333	4	0.333333	4	0.333333	4	3.04762	0.333333	4	-2	-2.25	-2.04762	-3	-2.3244
LTRL590_360050500.1	LtrL590_36:1,541,129..1,542,220(+)	363	1092	RNA polymerase-associated protein CDC73, putative	0.666667	5	0	3	0	2	3.33333	0.166667	7	0.166667	7	0	5	6.33333	0	4	0	4	0	4	0	4	4	0.166667	7	0	4	0	4	0	4	0	4	0	4	0	4	3.85714	0	3	3	2.33333	2.47619	3.33333	2.78571
LTRL590_360054600.1	LtrL590_36:1,713,223..1,714,452(+)	409	1230	proteasome regulatory ATPase subunit	0	2	0	1	0	1	1.33333	0	3	0	3	0	2	2.66667	0	2	0	2	0	2	0	2	2	0	3	0	2	0	2	0	2	0	2	0	2	0	2	1.85714	0	1	1.33333	0.666667	0.809524	1.66667	1.11905
LTRL590_310012000.1	LtrL590_31:200,184..201,809(-)	541	1626	amino acid transporter aATP11, putative	#DIV/0!	1	#DIV/0!	0	#DIV/0!	0	0.333333	0	2	0	2	0	2	2	0	1	0	1	0	1	0	1	1	0	2	0	1	0	1	0	1	0	1	#DIV/0!	0	0	1	0.857143	#DIV/0!	0	1.66667	1	1.14286	2	1.45238
LTRL590_350017300.1	LtrL590_35:458,299..458,958(+)	219	660	Degradation arginine-rich protein for mis-folding, putative	0.666667	5	1	6	1	6	5.66667	0.25	5	0.25	5	0.666667	5	5	1	6	1	6	1	6	1	6	6	0.25	5	1	6	1	6	1	6	1	6	1	6	1	6	5.14286	0.666667	5	-0.666667	-1	-0.142857	0	-0.452381
LTRL590_300010300.1	LtrL590_30:155,546..157,198(-)	550	1653	aspartyl-tRNA synthetase, putative	0.166667	7	0.5	6	0	4	5.66667	0.5	6	0.5	6	0	5	5.66667	0	6	0	6	0	6	0	6	6	0.5	6	0	6	0	6	0	6	0	6	0	6	0	6	5.14286	0	5	0	-0.333333	0.52381	0.666667	0.214286
LTRL590_350005500.1	LtrL590_35:17,402..18,502(-)	366	1101	2-oxoisovalerate dehydrogenase beta subunit, mitochondrial precursor, putative	2	3	2	3	1	4	3.33333	0.333333	4	0.333333	4	#DIV/0!	1	3	3	4	3	4	3	4	#DIV/0!	0	3	0.333333	4	3	4	3	4	3	4	3	4	3	4	3	4	3.85714	3	4	-0.333333	0	-0.857143	-1	-0.547619
LTRL590_320010700.1	LtrL590_32:196,469..196,921(+)	150	453	profilin, putative	1	2	0	1	0	1	1.33333	1	2	1	2	#DIV/0!	0	1.33333	1	2	1	2	1	2	1	2	2	1	2	1	2	1	2	1	2	1	2	1	2	1	2	1.85714	0	1	0	-0.666667	-0.52381	0.333333	-0.214286
LTRL590_040015100.1	LtrL590_04:385,220..385,888(-)	222	669	Domain of unknown function (DUF947), putative	#DIV/0!	0	0	1	#DIV/0!	0	0.333333	0	1	0	1	#DIV/0!	0	0.666667	0	1	0	1	0	1	0	1	1	0	1	0	1	0	1	0	1	0	1	0	1	0	1	0.857143	#DIV/0!	0	0.333333	-0.333333	-0.190476	0.666667	0.119048
LTRL590_330012500.1	LtrL590_33:216,085..216,543(+)	152	459	hypothetical protein, conserved	0	1	#DIV/0!	0	#DIV/0!	0	0.333333	0	1	0	1	1	2	1.33333	0	1	0	1	0	1	0	1	1	0	1	0	1	0	1	0	1	0	1	0	1	0	1	0.857143	#DIV/0!	0	1	0.333333	0.47619	1.33333	0.785714
LTRL590_070009800.1	LtrL590_07:190,781..192,494(-)	571	1713	hypothetical protein, conserved	3	4	1.5	5	1.5	5	4.66667	0.5	3	0.5	3	1	2	2.66667	1.5	5	1.5	5	1	6	1	6	5.5	0.5	3	1.5	5	1	6	1	6	1	6	1.5	5	1.5	5	4.42857	1.5	5	-2	-2.83333	-1.7619	-2.33333	-2.23214
LTRL590_130005600.1	LtrL590_13:13,888..14,478(-)	196	591	hypothetical protein, conserved	2.5	7	2.5	7	2.5	7	7	0.666667	5	0.666667	5	1	4	4.66667	2.5	7	2.5	7	2.5	7	2.5	7	7	0.666667	5	2.5	7	2.5	7	2.5	7	2.5	7	2.5	7	2.5	7	6.07143	2.5	7	-2.33333	-2.33333	-1.40476	-2.33333	-2.10119
LTRL590_040017400.1	LtrL590_04:472,286..475,471(-)	1061	3186	hypothetical protein, conserved	0.444444	13	0.6	8	0.444444	13	11.3333	0.6	16	0.6	16	0.5	9	13.6667	0.571429	11	0.571429	11	0.571429	11	0.571429	11	11	0.6	16	0.571429	11	0.571429	11	0.571429	11	0.571429	11	0.571429	11	0.571429	11	10.2245	0.571429	11	2.33333	2.66667	3.44218	2.66667	2.77721
LTRL590_180017800.1	LtrL590_18:528,150..528,461(+)	103	312	Prolyl-tRNA synthetase, C-terminal, putative	0	1	#DIV/0!	0	0	1	0.666667	0.5	3	0.5	3	0	2	2.66667	0	1	0	1	0	1	0	1	1	0.5	3	0	1	0	1	0	1	0	1	#DIV/0!	0	0	1	1	#DIV/0!	0	2	1.66667	1.66667	2.66667	2
LTRL590_280006300.1	LtrL590_28:34,252..34,800(+)	182	549	hypothetical protein, conserved	1	6	1.33333	7	1.33333	7	6.66667	1.66667	8	1.66667	8	0.75	7	7.66667	1	8	1	8	1	8	#DIV/0!	0	6	1.66667	8	1	8	1	8	1	8	1	8	1	8	1	8	7	0.75	7	1	1.66667	0.666667	0.666667	1
LTRL590_000005700.1	LTRL590_SCAF000007:1,127..2,140(-)	337	1014	hypothetical protein, conserved	0	2	0	1	0	2	1.66667	2	3	2	3	1.5	5	3.66667	1	2	1	2	1	2	1	2	2	2	3	1	2	1	2	1	2	1	2	1	2	1	2	2	0	1	2	1.66667	1.66667	2.66667	2
LTRL590_300013700.1	LtrL590_30:249,901..251,871(+)	656	1971	mitochondrial oligo_U binding protein TBRGG1, putative	2	6	2.5	7	1.5	5	6	1.75	11	1.75	11	0.75	7	9.66667	0.75	7	0.75	7	0.75	7	0.75	7	7	1.75	11	0.75	7	0.75	7	0.75	7	0.75	7	0.75	7	0.75	7	6.67857	0.75	7	3.66667	2.66667	2.9881	2.66667	2.99702
LTRL590_340014600.1	LtrL590_34:380,402..380,905(+)	167	504	hypothetical protein, conserved	0	2	0	4	0	2	2.66667	#DIV/0!	1	#DIV/0!	1	#DIV/0!	1	1	0	2	0	2	0	2	1	4	2.5	#DIV/0!	1	1	4	1	4	1	4	1	4	1	4	1	4	3.14286	0	2	-1.66667	-1.5	-2.14286	-1	-1.57738
LTRL590_030014600.1	LtrL590_03:370,683..371,807(-)	374	1125	peter pan protein, putative	0.5	3	0.5	3	0.5	3	3	0.5	3	0.5	3	#DIV/0!	0	2	0.5	3	0.5	3	0.5	3	0.5	3	3	0.5	3	0.5	3	0.5	3	0.5	3	0.5	3	0.5	3	0.5	3	2.64286	0	2	-1	-1	-0.642857	0	-0.660714
LTRL590_260030600.1	LtrL590_26:978,285..978,536(+)	83	252	phosphatidylinositol-4-phosphate 5-kinase, putative	0.5	3	0.5	3	0.5	3	3	#DIV/0!	3	#DIV/0!	3	#DIV/0!	2	2.66667	0.5	3	0.5	3	0.5	3	0.5	3	3	#DIV/0!	3	0.5	3	0.5	3	0.5	3	0.5	3	0.5	3	0.5	3	2.64286	1	2	-0.333333	-0.333333	0.0238095	0.666667	0.00595238
LTRL590_270008200.1	LtrL590_27:83,807..85,291(+)	494	1485	hypothetical protein, conserved	0.25	5	0.333333	4	0.25	5	4.66667	1	10	1	10	1.33333	7	9	0.5	6	0.5	3	0.5	6	0.5	6	5.25	1	10	0.5	6	0.5	6	0.5	6	0.5	6	0.5	6	0.5	6	5.78571	0.25	5	4.33333	3.75	3.21429	4	3.8244
LTRL590_130009500.1	LtrL590_13:155,346..155,942(+)	198	597	60S ribosomal protein L18, putative	0	1	0	1	0	1	1	0	1	0	1	0.25	5	2.33333	0	1	0	1	0	1	0	1	1	0	1	0	1	0	1	0	1	0	1	#DIV/0!	0	0	1	0.714286	#DIV/0!	0	1.33333	1.33333	1.61905	2.33333	1.65476
LTRL590_320026700.1	LtrL590_32:790,410..791,303(-)	297	894	ribosome biogenesis protein TSR3, putative	3	4	3	4	3	4	4	2.5	7	2.5	7	3	4	6	3	4	3	4	3	4	3	4	4	2.5	7	3	4	3	4	3	4	3	4	3	4	3	4	4.28571	4	5	2	2	1.71429	1	1.67857
LTRL590_320046100.1	LtrL590_32:1,490,996..1,491,295(+)	99	300	cyclin-dependent kinase regulatory subunit	1	2	1	2	1	2	2	0	1	0	1	0	1	1	1	2	1	2	1	2	1	2	2	0	1	1	2	1	2	1	2	1	2	1	2	1	2	1.71429	#DIV/0!	1	-1	-1	-0.714286	0	-0.678571
LTRL590_260018600.1	LtrL590_26:469,239..469,823(+)	194	585	prefoldin-like protein	0	1	0	1	0	1	1	0	1	0	1	0	1	1	1	2	1	2	1	2	1	2	2	0	1	1	2	1	2	1	2	1	2	1	2	1	2	1.71429	1	2	0	-1	-0.714286	-1	-0.678571
LTRL590_300012100.1	LtrL590_30:217,239..217,853(-)	204	615	hypothetical protein, conserved	0	1	0	1	0	1	1	#DIV/0!	1	#DIV/0!	1	#DIV/0!	1	1	1	2	1	2	1	2	1	2	2	#DIV/0!	1	1	2	1	2	1	2	1	2	1	2	1	2	1.71429	1	2	0	-1	-0.714286	-1	-0.678571
LTRL590_300013000.1	LtrL590_30:240,212..240,547(+)	111	336	heat shock protein grpe	#DIV/0!	1	#DIV/0!	1	#DIV/0!	1	1	0	1	0	1	0	1	1	1	2	1	2	1	2	1	2	2	0	1	1	2	1	2	1	2	1	2	1	2	1	2	1.71429	1	2	0	-1	-0.714286	-1	-0.678571
LTRL590_340024700.1	LtrL590_34:766,059..766,301(-)	80	243	ubiquitin-like protein	#DIV/0!	0	#DIV/0!	0	#DIV/0!	0	0	#DIV/0!	0	#DIV/0!	0	#DIV/0!	0	0	0	1	0	1	0	1	0	1	1	#DIV/0!	0	0	1	0	1	0	1	0	1	0	1	0	1	0.714286	0	1	0	-1	-0.714286	-1	-0.678571
LTRL590_170005800.1	LtrL590_17:18,397..18,960(-)	187	564	ADP-ribosylation factor-like protein 1	0	1	0	1	0	1	1	0	2	0	2	0	3	2.33333	0	2	0	2	0	2	0	2	2	0	2	0	2	0	2	0	2	0	2	0	2	0	2	1.71429	0	2	1.33333	0.333333	0.619048	0.333333	0.654762
LTRL590_360063400.1	LtrL590_36:2,023,370..2,023,999(-)	209	630	vacuolar protein sorting-associated protein-like protein	0	2	0	2	0	2	2	0	4	0	4	0	2	3.33333	0	3	0	3	0	3	0	3	3	0	4	0	3	0	3	0	3	0	3	0	3	0	3	2.71429	0	3	1.33333	0.333333	0.619048	0.333333	0.654762
LTRL590_320040100.1	LtrL590_32:1,273,200..1,273,697(+)	165	498	NADH dehydrogenase subunit NI8M, putative	0	2	0	2	0	2	2	0	1	0	1	0	1	1	0	3	0	3	0	3	0	3	3	0	1	0	3	0	3	0	3	0	3	0	3	0	3	2.28571	0	2	-1	-2	-1.28571	-1	-1.32143
LTRL590_270021900.1	LtrL590_27:640,635..641,039(+)	134	405	DNA-directed RNA polymerase II-like protein	0	1	0	1	0	1	1	0	2	0	2	0	1	1.66667	0	2	0	2	0	2	0	2	2	0	2	0	2	0	2	0	2	0	2	0	2	0	2	1.71429	0	2	0.666667	-0.333333	-0.047619	-0.333333	-0.0119048
LTRL590_350034600.1	LtrL590_35:1,099,396..1,099,821(-)	141	426	Sybindin-like family, putative	0	2	0	2	0	2	2	1	2	1	2	1	2	2	0	2	0	2	0	2	0	2	2	1	2	0	2	0	2	0	2	0	2	0	2	0	2	1.71429	0	1	0	0	0.285714	1	0.321429
LTRL590_130022000.1	LtrL590_13:645,215..646,033(-)	272	819	pyrroline-5-carboxylate reductase	6	7	6	7	6	7	7	1	6	1	6	0.5	6	6	6	7	6	7	6	7	6	7	7	1	6	6	7	6	7	6	7	6	7	6	7	6	7	6.71429	5	6	-1	-1	-0.714286	0	-0.678571
LTRL590_350051500.1	LtrL590_35:1,702,165..1,702,395(+)	76	231	sm-f snRNP core complex protein, putative	0	1	0	1	0	1	1	#DIV/0!	0	#DIV/0!	0	0	1	0.333333	0	1	0	1	0	1	0	1	1	#DIV/0!	0	0	1	0	1	0	1	0	1	0	1	0	1	0.714286	#DIV/0!	0	-0.666667	-0.666667	-0.380952	0.333333	-0.345238
LTRL590_170013600.1	LtrL590_17:386,088..386,441(-)	117	354	hypothetical protein, conserved	#DIV/0!	0	#DIV/0!	0	#DIV/0!	0	0	#DIV/0!	0	#DIV/0!	0	0	1	0.333333	0	1	0	1	0	1	0	1	1	#DIV/0!	0	0	1	0	1	0	1	0	1	0	1	0	1	0.714286	0	1	0.333333	-0.666667	-0.380952	-0.666667	-0.345238
LTRL590_360031900.1	LtrL590_36:973,434..973,991(+)	185	558	hypothetical protein	1	4	1	4	1	4	4	1.5	5	1.5	5	1.5	5	5	0.666667	5	0.666667	5	0.666667	5	0.666667	5	5	1.5	5	0.666667	5	0.666667	5	0.666667	5	0.666667	5	0.666667	5	0.666667	5	4.38095	1	4	1	0	0.619048	1	0.654762
LTRL590_080005300.1	LtrL590_08:12,182..12,871(+)	229	690	hypothetical protein, conserved	0	3	0	3	0	3	3	#DIV/0!	3	#DIV/0!	3	#DIV/0!	1	2.33333	0	4	0	4	0	4	0	4	4	#DIV/0!	3	0	4	0	4	0	4	0	4	0	4	0	4	3.28571	0	3	-0.666667	-1.66667	-0.952381	-0.666667	-0.988095
LTRL590_200011500.1	LtrL590_20:195,480..196,178(+)	232	699	RWD domain-containing protein	0.5	3	0.5	3	0.5	3	3	1	2	1	2	2	3	2.33333	1	4	1	4	1	4	1	4	4	1	2	1	4	1	4	1	4	1	4	1	4	1	4	3.28571	0.5	3	-0.666667	-1.66667	-0.952381	-0.666667	-0.988095
LTRL590_300016800.1	LtrL590_30:352,322..352,930(+)	202	609	RF-1 domain containing protein, putative	2	3	2	3	2	3	3	0.666667	5	0.666667	5	0.166667	7	5.66667	1	4	1	4	1	4	1	4	4	0.666667	5	1	4	1	4	1	4	1	4	1	4	1	4	3.71429	1	4	2.66667	1.66667	1.95238	1.66667	1.9881
LTRL590_300022200.1	LtrL590_30:569,672..570,427(+)	251	756	CRAL/TRIO domain containing protein, putative	#DIV/0!	4	1.33333	7	#DIV/0!	4	5	1	8	1	8	1	8	8	2	6	2	6	2	6	2	6	6	1	8	2	6	2	6	2	6	2	6	2	6	2	6	5.71429	2	6	3	2	2.28571	2	2.32143
LTRL590_300009400.1	LtrL590_30:126,516..127,670(-)	384	1155	phosphatase 2C, putative	0	3	0.4	7	0	2	4	0.4	7	0.4	7	1	6	6.66667	0.25	5	0.25	5	0.25	5	0.25	5	5	0.4	7	0.25	5	0.25	5	0.25	5	0.25	5	0.25	5	0.25	5	4.60714	0.25	5	2.66667	1.66667	2.05952	1.66667	2.01488
LTRL590_180009800.1	LtrL590_18:191,624..193,012(-)	462	1389	serine carboxypeptidase (CBP1), putative	0.5	9	0.75	7	0.6	8	8	0.857143	13	0.857143	13	1	14	13.3333	0.8	9	0.8	9	0.8	9	0.8	9	9	0.857143	13	0.8	9	0.8	9	0.8	9	0.8	9	0.8	9	0.8	9	8.4	0.6	8	5.33333	4.33333	4.93333	5.33333	4.98333
LTRL590_030015300.1	LtrL590_03:384,806..385,870(-)	354	1065	MORN repeat, putative	0.2	6	0.2	6	0.2	6	6	0.666667	10	0.666667	10	0.5	6	8.66667	0.2	6	0.2	6	0.2	6	0.2	6	6	0.666667	10	0.2	6	0.2	6	0.2	6	0.2	6	0.2	6	0.2	6	5.74286	0.25	5	2.66667	2.66667	2.92381	3.66667	2.98095
LTRL590_360010100.1	LtrL590_36:125,663..126,340(-)	225	678	hypothetical protein, conserved	0	1	0	1	0	1	1	0	1	0	1	2	3	1.66667	0	1	0	1	#DIV/0!	0	0	1	0.75	0	1	0	1	0	2	0	1	0	1	0	1	0	1	1	#DIV/0!	0	0.666667	0.916667	0.666667	1.66667	0.979167
LTRL590_280025100.1	LtrL590_28:741,277..742,680(-)	467	1404	replication factor A, 51kDa subunit, putative	0	3	0	3	0	3	3	0	1	0	1	0	1	1	0	4	0	4	0	4	0	1	3.25	0	1	0	4	0	4	0	4	0	4	0	4	0	4	3	0	4	-2	-2.25	-2	-3	-2.3125
LTRL590_050013500.1	LtrL590_05:338,756..339,616(+)	286	861	surface antigen-like protein	0.5	3	0	1	0	2	2	0.5	3	0.5	3	0.5	3	3	1	2	1	2	1	2	0	1	1.75	0.5	3	1	2	1	2	1	2	1	2	1	2	1	2	2	0	1	1	1.25	1	2	1.3125
LTRL590_160006500.1	LtrL590_16:43,840..44,109(-)	89	270	hypothetical protein	3	4	3	4	3	4	4	#DIV/0!	2	#DIV/0!	2	#DIV/0!	1	1.66667	3	4	3	4	3	4	#DIV/0!	0	3	#DIV/0!	2	3	4	3	4	3	4	3	4	3	4	3	4	3.57143	3	4	-2.33333	-1.33333	-1.90476	-2.33333	-1.97619
LTRL590_250010800.1	LtrL590_25:175,581..176,084(-)	167	504	RNA-binding protein, putative, UPB2	1	2	1	2	1	2	2	1	2	1	2	2	3	2.33333	1	2	1	2	1	2	1	2	2	1	2	1	2	0	1	0	1	1	2	1	2	1	2	1.57143	#DIV/0!	1	0.333333	0.333333	0.761905	1.33333	0.690476
LTRL590_200009100.1	LtrL590_20:129,316..130,023(+)	235	708	hypothetical protein, conserved	3	4	1	6	4	5	5	2.5	7	2.5	7	3	8	7.33333	2	6	2	6	2	6	2	6	6	2.5	7	2	6	2	6	2	6	2	6	2	6	2	6	5.57143	2	6	2.33333	1.33333	1.7619	1.33333	1.69048
LTRL590_040008400.1	LtrL590_04:111,290..111,862(+)	190	573	hypothetical protein, conserved	0	3	0	3	0	3	3	0.25	5	0.25	5	0	2	4	0	4	0	4	0	4	0	4	4	0.25	5	0	4	0	4	0	4	0	4	0	4	0	4	3.57143	0	4	1	0	0.428571	0	0.357143
LTRL590_210025300.1	LtrL590_21:714,769..715,791(-)	340	1023	mitochondrial RNA binding complex 1 subunit, putative	0	2	0	2	0	2	2	0	3	0	3	0	4	3.33333	0	3	0	3	0	3	0	3	3	0	3	0	3	0	3	0	3	0	3	0	3	0	3	2.57143	0	3	1.33333	0.333333	0.761905	0.333333	0.690476
LTRL590_350027300.1	LtrL590_35:804,849..805,343(+)	164	495	60S ribosomal protein L12, putative	0	1	0	1	0	1	1	#DIV/0!	0	#DIV/0!	0	0	1	0.333333	0	1	0	1	0	1	0	1	1	#DIV/0!	0	0	1	0	1	0	1	0	1	#DIV/0!	0	0	1	0.571429	#DIV/0!	0	-0.666667	-0.666667	-0.238095	0.333333	-0.309524
LTRL590_020008600.1	LtrL590_02:175,518..176,663(-)	381	1146	casein kinase II, alpha chain, putative	0	3	0	3	0	3	3	0	3	0	3	0	2	2.66667	0	3	0	3	0	3	0	3	3	0	3	0	3	0	3	0	3	0	3	0	3	0	3	2.57143	0	2	-0.333333	-0.333333	0.0952381	0.666667	0.0238095
LTRL590_320017200.1	LtrL590_32:431,777..432,022(+)	81	246	small nuclear ribonucleoprotein, putative	1	2	1	2	1	2	2	1	2	1	2	1	2	2	1	2	1	2	1	2	1	2	2	1	2	1	2	1	2	1	2	#DIV/0!	1	#DIV/0!	1	1	2	1.57143	0	1	0	0	0.428571	1	0.357143
LTRL590_360039000.1	LtrL590_36:1,229,315..1,229,509(-)	64	195	hypothetical protein	2	3	2	3	2	3	3	1	4	1	4	2	3	3.66667	1	4	1	4	1	4	1	4	4	1	4	1	4	1	4	1	4	1	4	1	4	1	4	3.57143	1	4	0.666667	-0.333333	0.0952381	-0.333333	0.0238095
LTRL590_300005500.1	LtrL590_30:11,744..12,169(-)	141	426	Uncharacterised protein family (UPF0220), putative	0	1	0	1	0	1	1	0	1	0	1	0.5	3	1.66667	0	2	0	2	0	2	0	2	2	0	1	0	2	0	2	0	2	0	2	0	2	0	2	1.57143	0	2	0.666667	-0.333333	0.0952381	-0.333333	0.0238095
LTRL590_320020700.1	LtrL590_32:563,731..564,963(-)	410	1233	Putative cyclase, putative	0	4	0	4	0	4	4	0	6	0	6	0	4	5.33333	0	5	0	5	0	5	0	5	5	0	6	0	5	0	5	0	5	0	5	0	5	0	5	4.42857	0	4	1.33333	0.333333	0.904762	1.33333	0.97619
LTRL590_040015900.1	LtrL590_04:407,777..408,106(-)	109	330	hypothetical protein, conserved	0	1	0	1	0	1	1	0	1	0	1	0	1	1	0	2	0	2	0	2	0	2	2	0	1	0	2	0	2	0	2	0	2	0	2	0	2	1.57143	0	2	0	-1	-0.571429	-1	-0.642857
LTRL590_060017300.1	LtrL590_06:475,940..476,347(+)	135	408	nuclear transport factor 2 protein(NFT2), putative	0	1	0	1	0	1	1	0	1	0	1	0	1	1	0	2	0	2	0	2	0	2	2	0	1	0	2	0	2	0	2	0	2	0	2	0	2	1.57143	0	2	0	-1	-0.571429	-1	-0.642857
LTRL590_360047900.1	LtrL590_36:1,462,004..1,462,315(+)	103	312	basic transcription factor 3a, putative	0	1	0	1	0	1	1	0	1	0	1	0	1	1	0	2	0	2	0	2	0	2	2	0	1	0	2	0	2	0	2	0	2	0	2	0	2	1.57143	0	2	0	-1	-0.571429	-1	-0.642857
LTRL590_270009000.1	LtrL590_27:112,779..113,201(+)	140	423	hypothetical protein, conserved	0	1	0	1	0	1	1	0	2	0	2	1	2	2	0	2	0	2	0	2	0	2	2	0	2	0	2	0	2	0	2	0	1	0	1	0	2	1.42857	0	1	1	0	0.571429	1	0.642857
LTRL590_320041400.1	LtrL590_32:1,342,805..1,343,527(+)	240	723	hypothetical protein, conserved	0	2	0	2	0	2	2	0	2	0	2	0	1	1.66667	0	3	0	3	0	3	0	3	3	0	2	0	3	0	3	0	3	0	3	0	3	0	3	2.42857	0	2	-0.333333	-1.33333	-0.761905	-0.333333	-0.690476
LTRL590_130009600.1	LtrL590_13:157,191..157,616(+)	141	426	40S ribosomal protein S12, putative	#DIV/0!	1	#DIV/0!	1	#DIV/0!	1	1	#DIV/0!	0	#DIV/0!	0	#DIV/0!	0	0	1	2	1	2	1	2	1	2	2	#DIV/0!	0	1	2	1	2	1	2	1	2	1	2	1	2	1.57143	1	2	-1	-2	-1.57143	-2	-1.64286
LTRL590_270028300.1	LtrL590_27:928,604..928,852(-)	82	249	hypothetical protein, conserved	#DIV/0!	1	#DIV/0!	1	#DIV/0!	1	1	#DIV/0!	0	#DIV/0!	0	#DIV/0!	0	0	1	2	1	2	1	2	1	2	2	#DIV/0!	0	1	2	1	2	1	2	1	2	1	2	1	2	1.57143	1	2	-1	-2	-1.57143	-2	-1.64286
LTRL590_350011700.1	LtrL590_35:244,928..245,758(+)	276	831	vacuolar ATP synthase subunit d, putative	0	1	0	1	0	2	1.33333	#DIV/0!	0	#DIV/0!	0	#DIV/0!	0	0	0	1	0	1	0	1	1	2	1.25	#DIV/0!	0	0	1	1	2	0	1	0	1	0	1	0	1	0.857143	1	2	-1.33333	-1.25	-0.857143	-2	-1.36012
LTRL590_230005500.1	LtrL590_23:12,345..13,232(+)	295	888	cyclophilin 11, putative	0	3	0	4	0	3	3.33333	0.5	6	0.5	6	0.5	6	6	0	4	0	4	0	4	0	1	3.25	0.5	6	0	4	0	4	0	1	0	1	0	1	0	4	2.85714	0	4	2.66667	2.75	3.14286	2	2.63988
LTRL590_210018100.1	LtrL590_21:443,490..444,062(+)	190	573	60S ribosomal protein L9, putative	1	2	1	2	1	2	2	1	2	1	2	0.5	3	2.33333	0.5	3	0.5	3	0.5	3	0.5	3	3	1	2	0.5	3	0.5	3	0.5	3	0.5	3	#DIV/0!	1	0.5	3	2.21429	1	2	0.333333	-0.666667	0.119048	0.333333	0.0297619
LTRL590_030011000.1	LtrL590_03:218,247..218,783(+)	178	537	hypothetical protein, conserved	0.5	3	0.5	3	0.333333	4	3.33333	#DIV/0!	0	#DIV/0!	0	#DIV/0!	0	0	0.5	3	0.5	3	0.5	3	0.5	3	3	#DIV/0!	0	0.5	3	0.5	3	0.5	3	0.5	3	0.5	3	0.5	3	2.21429	0.5	3	-3.33333	-3	-2.21429	-3	-2.8869
LTRL590_230014000.1	LtrL590_23:263,077..265,353(-)	758	2277	kinesin, putative	0.6	8	0.5	9	0.8	9	8.66667	1	6	1	6	1.66667	8	6.66667	0.666667	10	0.666667	10	0.666667	10	1	2	8	1	6	0.666667	10	0.666667	10	0.666667	10	0.666667	10	0.666667	10	0.666667	10	8.09524	0.5	9	-2	-1.33333	-1.42857	-2.33333	-1.77381
LTRL590_280037700.1	LtrL590_28:1,182,254..1,182,619(-)	121	366	hypothetical protein, conserved	1	4	2	3	2	3	3.33333	#DIV/0!	1	#DIV/0!	1	1	2	1.33333	2	3	2	3	2	3	#DIV/0!	0	2.25	#DIV/0!	1	2	3	2	3	2	3	2	3	2	3	2	3	2.57143	2	3	-2	-0.916667	-1.2381	-1.66667	-1.45536
LTRL590_240030900.1	LtrL590_24:876,652..877,428(-)	258	777	hypothetical protein, conserved	0.333333	4	0.333333	4	0.333333	4	4	0.2	6	0.2	6	0	7	6.33333	0.25	5	0.25	5	0.25	5	0.25	5	5	0.2	6	0.25	5	0.25	5	0.25	5	0.25	5	0.25	5	0.25	5	4.46429	0.333333	4	2.33333	1.33333	1.86905	2.33333	1.96726
LTRL590_080006200.1	LtrL590_08:35,141..35,953(+)	270	813	hypothetical protein, conserved	0	3	0	3	0	4	3.33333	#DIV/0!	1	#DIV/0!	1	0	2	1.33333	0	3	0	3	0	3	0	4	3.25	#DIV/0!	1	0	3	0	3	0	3	0	3	0	3	0	3	2.28571	0	3	-2	-1.91667	-0.952381	-1.66667	-1.63393
LTRL590_250031400.1	LtrL590_25:882,284..882,673(+)	129	390	hypothetical protein	0	3	0	3	0	3	3	1	2	1	2	2	3	2.33333	0.5	3	0.333333	4	#DIV/0!	1	0.333333	4	3	1	2	0.333333	4	0.333333	4	0.333333	4	0.333333	4	0.333333	4	0.333333	4	3.19048	0.333333	4	-0.666667	-0.666667	-0.857143	-1.66667	-0.964286
LTRL590_360045000.1	LtrL590_36:1,378,301..1,378,861(-)	186	561	hypothetical protein, conserved	0.5	3	0	2	1	4	3	1	4	1	4	1	4	4	0.333333	4	0.333333	4	0.333333	4	0.333333	4	4	1	4	0.333333	4	0.333333	4	0.333333	4	0.333333	4	0.333333	4	0.333333	4	3.47619	0.5	3	1	0	0.52381	1	0.630952
LTRL590_280015200.1	LtrL590_28:351,996..352,376(+)	126	381	Tctex-1 family, putative	0	4	0	4	0	4	4	0.333333	4	0.333333	4	1	4	4	0.25	5	0.25	5	0.25	5	#DIV/0!	1	4	0.333333	4	0.25	5	0.25	5	0.25	5	0.25	5	0.25	5	0.25	5	4.17857	0.25	5	0	0	-0.178571	-1	-0.294643
LTRL590_280034800.1	LtrL590_28:1,089,575..1,089,943(-)	122	369	hypothetical protein, conserved	0.333333	4	0.333333	4	0.333333	4	4	0.333333	4	0.333333	4	0	2	3.33333	0.25	5	0.25	5	0.25	5	0	1	4	0.333333	4	0.25	5	0.25	5	0.25	5	0.25	5	0.25	5	0.25	5	4.17857	0.25	5	-0.666667	-0.666667	-0.845238	-1.66667	-0.96131
LTRL590_310041600.1	LtrL590_31:1,473,717..1,474,217(-)	166	501	hypothetical protein	5	6	5	6	5	6	6	1	2	1	2	1	4	2.66667	6	7	5	6	6	7	6	7	6.75	1	2	6	7	6	7	6	7	6	7	6	7	6	7	6.14286	6	7	-3.33333	-4.08333	-3.47619	-4.33333	-3.80655
LTRL590_280019600.1	LtrL590_28:509,417..509,662(+)	81	246	haloacid dehalogenase-like hydrolase, putative	2	3	2	3	2	3	3	#DIV/0!	3	#DIV/0!	3	#DIV/0!	2	2.66667	2	3	2	3	2	3	#DIV/0!	0	2.25	#DIV/0!	3	2	3	2	3	2	3	2	3	2	3	2	3	2.85714	1	2	-0.333333	0.416667	-0.190476	0.666667	0.139881
LTRL590_100015300.1	LtrL590_10:313,151..313,522(+)	89	270	Protein of unknown function (DUF1861), putative	0	1	0	1	0	1	1	0	1	0	1	0	1	1	#DIV/0!	0	#DIV/0!	0	#DIV/0!	0	0	1	0.25	0	1	0	1	0	1	0	1	0	1	0	1	0	1	0.857143	#DIV/0!	0	0	0.75	0.142857	1	0.473214
LTRL590_360073700.1	LtrL590_36:2,401,046..2,401,399(-)	117	354	Protein of unknown function (DUF2763), putative	0	1	0	1	0	1	1	0	1	0	1	0.5	3	1.66667	#DIV/0!	0	#DIV/0!	0	#DIV/0!	0	0	1	0.25	0	1	0	1	0	1	0	1	0	1	0	1	0	1	0.857143	#DIV/0!	0	0.666667	1.41667	0.809524	1.66667	1.13988
LTRL590_090005200.1	LtrL590_09:4,730..5,053(+)	107	324	hypothetical protein, conserved	#DIV/0!	0	#DIV/0!	0	#DIV/0!	0	0	0	1	0	1	0	1	1	#DIV/0!	0	#DIV/0!	0	#DIV/0!	0	0	1	0.25	0	1	0	1	0	1	0	1	0	1	0	1	0	1	0.857143	0	1	1	0.75	0.142857	0	0.473214
LTRL590_110019100.1	LtrL590_11:514,685..515,077(+)	130	393	40S ribosomal protein S15A, putative	#DIV/0!	0	#DIV/0!	0	#DIV/0!	0	0	0	1	0	1	0	1	1	#DIV/0!	0	#DIV/0!	0	#DIV/0!	0	0	1	0.25	0	1	0	1	0	1	0	1	0	1	0	1	0	1	0.857143	0	1	1	0.75	0.142857	0	0.473214
LTRL590_280025900.1	LtrL590_28:770,208..770,432(-)	74	225	hypothetical protein	2	3	2	3	2	3	3	1	4	1	4	1	4	4	3	4	3	4	3	4	#DIV/0!	1	3.25	1	4	3	4	3	4	3	4	3	4	3	4	3	4	3.85714	3	4	1	0.75	0.142857	0	0.473214
LTRL590_360077800.1	LtrL590_36:2,535,632..2,536,225(-)	197	594	hypothetical protein, conserved	0	1	0	1	0	1	1	0	3	0	3	0	5	3.66667	0	1	0	1	0	1	0	2	1.25	0	3	0	2	0	2	0	2	0	2	0	2	0	2	1.85714	0	2	2.66667	2.41667	1.80952	1.66667	2.13988
LTRL590_360064900.1	LtrL590_36:2,087,609..2,088,724(-)	371	1116	hypothetical protein, conserved	0	1	0	1	0	2	1.33333	0.25	5	0.25	5	0.5	3	4.33333	1	2	1	2	1	2	0	2	2	0.25	5	0	2	0	2	0.5	3	0.5	3	0.5	3	0	2	2.5	1	2	3	2.33333	1.83333	2.33333	2.375
LTRL590_260010000.1	LtrL590_26:134,726..135,178(-)	150	453	hypothetical protein	8	9	5	6	5	6	7	#DIV/0!	2	#DIV/0!	2	#DIV/0!	4	2.66667	7	8	7	8	7	8	#DIV/0!	2	6.5	#DIV/0!	2	7	8	7	8	7	8	7	8	7	8	7	8	7	5	6	-4.33333	-3.83333	-4.33333	-3.33333	-3.95833
LTRL590_260022100.1	LtrL590_26:608,759..609,175(+)	138	417	hypothetical protein	1	2	1	2	1	2	2	0	2	0	2	0	2	2	0.5	3	0.5	3	0.5	3	0.5	3	3	0	2	0.5	3	0.5	3	0.5	3	0.5	3	0.5	3	0.5	3	2.5	0.5	3	0	-1	-0.5	-1	-0.625
LTRL590_270023200.1	LtrL590_27:725,908..726,228(+)	106	321	hypothetical protein	1	2	1	2	1	2	2	1	2	1	2	1	2	2	0.5	3	0.5	3	0.5	3	0.5	3	3	1	2	0.5	3	0.5	3	0.5	3	0.5	3	0.5	3	0.5	3	2.5	0.5	3	0	-1	-0.5	-1	-0.625
LTRL590_050016200.1	LtrL590_05:428,593..429,666(-)	357	1074	vacuolar ATPase subunit-like protein	1	2	1	2	1	2	2	1	4	1	4	1	6	4.66667	2	3	2	3	2	3	#DIV/0!	1	2.5	1	4	2	3	2	3	2	3	2	3	2	3	2	3	3	2	3	2.66667	2.16667	1.66667	1.66667	2.04167
LTRL590_150005000.1	LtrL590_15:1,178..1,480(-)	100	303	histone H4	0.5	3	0.5	3	0.5	3	3	0.5	6	0.5	6	0.5	6	6	0.5	3	0.5	3	0.5	3	0.5	3	3	0.5	6	0.5	3	#DIV/0!	1	0.5	3	0.5	3	0	1	0.5	3	2.5	1	2	3	3	3.5	4	3.375
LTRL590_350023700.1	LtrL590_35:661,624..662,076(+)	150	453	hypothetical protein, conserved	1	4	1.5	5	2	6	5	1.5	5	1.5	5	#DIV/0!	3	4.33333	1.5	5	1.5	5	1.5	5	1.5	5	5	1.5	5	1.5	5	1.5	5	1.5	5	1.5	5	1.5	5	1.5	5	4.5	1	4	-0.666667	-0.666667	-0.166667	0.333333	-0.291667
LTRL590_270025500.1	LtrL590_27:824,817..825,935(-)	372	1119	GTP binding protein, putative	1	4	1	4	1	4	4	1.5	5	1.5	5	2	3	4.33333	1.5	5	1.5	5	1.5	5	1.5	5	5	1.5	5	1.5	5	1.5	5	1.5	5	1.5	5	1.5	5	1.5	5	4.5	1.5	5	0.333333	-0.666667	-0.166667	-0.666667	-0.291667
LTRL590_200017200.1	LtrL590_20:499,981..500,790(+)	269	810	Pre-mRNA-splicing factor 38, putative	1	2	1	2	1	2	2	1	2	1	2	#DIV/0!	0	1.33333	0.5	3	0.5	3	0.5	3	0.5	3	3	1	2	0.5	3	0.5	3	0.5	3	0.5	3	0.5	3	0.5	3	2.5	0.5	3	-0.666667	-1.66667	-1.16667	-1.66667	-1.29167
LTRL590_120005500.1	LtrL590_12:8,601..8,924(+)	107	324	hypothetical protein, conserved	0	2	0	2	0	2	2	0.25	5	0.25	5	0.5	3	4.33333	0	3	0	3	0	3	0	3	3	0.25	5	0	3	0	3	0	3	0	3	0	3	0	3	2.85714	0	3	2.33333	1.33333	1.47619	1.33333	1.61905
LTRL590_310005900.1	LtrL590_31:17,506..17,889(-)	127	384	hypothetical protein, conserved	1	2	1	2	1	2	2	0.5	3	0.5	3	0	1	2.33333	0	1	0	1	0	1	0	1	1	0.5	3	0	1	0	1	0	1	0	1	0	1	0	1	1.14286	0	1	0.333333	1.33333	1.19048	1.33333	1.04762
LTRL590_240030300.1	LtrL590_24:864,535..865,371(-)	278	837	zinc-finger multi-pass transmembrane protein	0.333333	4	0.333333	4	0.333333	4	4	0.5	3	0.5	3	1	4	3.33333	0.333333	4	0.333333	4	0.333333	4	0.333333	4	4	0.5	3	0.333333	4	0.25	5	0.333333	4	0.333333	4	0.333333	4	0.333333	4	3.47619	0	3	-0.666667	-0.666667	-0.142857	0.333333	-0.285714
LTRL590_350040500.1	LtrL590_35:1,313,954..1,314,307(-)	117	354	Replication factor A protein 3, putative	0	1	0	1	0	1	1	0	1	0	1	0	2	1.33333	0	1	0	1	0	1	0	1	1	0	1	0	1	0	1	0	1	0	1	0	1	0	1	0.857143	#DIV/0!	0	0.333333	0.333333	0.47619	1.33333	0.619048
LTRL590_290016200.1	LtrL590_29:379,106..379,633(+)	175	528	A-1 protein, putative	#DIV/0!	0	#DIV/0!	0	#DIV/0!	0	0	0	1	0	1	1	2	1.33333	0	1	0	1	0	1	0	1	1	0	1	0	1	0	1	0	1	0	1	0	1	0	1	0.857143	0	1	1.33333	0.333333	0.47619	0.333333	0.619048
LTRL590_360039600.1	LtrL590_36:1,240,541..1,241,281(-)	246	741	exosome complex exonuclease RRP41, putative	#DIV/0!	0	#DIV/0!	0	#DIV/0!	0	0	0	1	0	1	0	2	1.33333	0	1	0	1	0	1	0	1	1	0	1	0	1	0	1	0	1	0	1	0	1	0	1	0.857143	0	1	1.33333	0.333333	0.47619	0.333333	0.619048
LTRL590_020011300.1	LtrL590_02:275,583..276,074(-)	163	492	hypothetical protein, conserved	2	3	2	3	2	3	3	0.5	3	0.5	3	1	2	2.66667	2	3	2	3	2	3	2	3	3	0.5	3	2	3	2	3	2	3	2	3	2	3	2	3	2.85714	#DIV/0!	2	-0.333333	-0.333333	-0.190476	0.666667	-0.047619
LTRL590_210027800.1	LtrL590_21:766,666..766,905(+)	79	240	BolA-like protein, putative	0	1	0	1	0	1	1	#DIV/0!	1	#DIV/0!	1	#DIV/0!	0	0.666667	0	1	0	1	0	1	0	1	1	#DIV/0!	1	0	1	0	1	0	1	0	1	0	1	0	1	0.857143	#DIV/0!	0	-0.333333	-0.333333	-0.190476	0.666667	-0.047619
LTRL590_270031300.1	LtrL590_27:1,042,652..1,042,993(+)	113	342	hypothetical protein, conserved	0	1	0	1	0	1	1	0	1	0	1	#DIV/0!	0	0.666667	#DIV/0!	0	#DIV/0!	0	#DIV/0!	0	#DIV/0!	0	0	0	1	0	1	0	1	0	1	0	1	0	1	0	1	0.857143	0	1	-0.333333	0.666667	-0.190476	-0.333333	-0.047619
LTRL590_180015500.1	LtrL590_18:427,155..427,493(+)	112	339	Dynein light chain roadblock-type protein, putative	#DIV/0!	0	#DIV/0!	0	#DIV/0!	0	0	0	1	0	1	#DIV/0!	0	0.666667	0	1	0	1	0	1	0	1	1	0	1	0	1	0	1	0	1	0	1	0	1	0	1	0.857143	0	1	0.666667	-0.333333	-0.190476	-0.333333	-0.047619
LTRL590_150016400.1	LtrL590_15:425,050..425,643(-)	197	594	succinate dehydrogenase, putative	#DIV/0!	1	#DIV/0!	1	#DIV/0!	1	1	1	2	1	2	0	1	1.66667	1	2	1	2	1	2	1	2	2	1	2	1	2	1	2	1	2	1	2	1	2	1	2	1.85714	1	2	0.666667	-0.333333	-0.190476	-0.333333	-0.047619
LTRL590_300014100.1	LtrL590_30:262,771..263,520(+)	249	750	hypothetical protein, conserved	4	5	4	5	4	5	5	1	6	1	6	4	5	5.66667	5	6	5	6	5	6	5	6	6	1	6	5	6	5	6	5	6	5	6	5	6	5	6	5.85714	5	6	0.666667	-0.333333	-0.190476	-0.333333	-0.047619
LTRL590_340025000.1	LtrL590_34:772,047..772,229(-)	60	183	hypothetical protein, conserved	0.5	3	#DIV/0!	0	#DIV/0!	0	1	#DIV/0!	0	#DIV/0!	0	#DIV/0!	1	0.333333	#DIV/0!	0	#DIV/0!	0	#DIV/0!	0	#DIV/0!	0	0	#DIV/0!	0	0	1	#DIV/0!	0	0	1	#DIV/0!	0	#DIV/0!	0	#DIV/0!	0	0.142857	#DIV/0!	0	-0.666667	0.333333	0.190476	0.333333	0.047619
LTRL590_030012500.1	LtrL590_03:278,499..279,260(-)	253	762	Aminoacyl-tRNA editing domain containing protein, putative	0	2	0	2	0	2	2	1	2	2	3	0	1	2	0	2	0	2	0	2	0	2	2	2	3	0	2	0	2	0	2	0	2	0	2	0	2	1.85714	0	1	0	0	0.142857	1	0.285714
LTRL590_140016600.1	LtrL590_14:469,005..469,289(-)	94	285	hypothetical protein, conserved	0	1	0	1	0	1	1	#DIV/0!	1	#DIV/0!	1	#DIV/0!	1	1	0	1	0	1	0	1	0	1	1	#DIV/0!	1	0	1	0	1	0	1	0	1	0	1	0	1	0.857143	#DIV/0!	0	0	0	0.142857	1	0.285714
LTRL590_350007500.1	LtrL590_35:64,521..64,835(+)	104	315	60S ribosomal protein L30	0	1	0	1	0	1	1	0	1	0	1	0	1	1	0	1	0	1	0	1	0	1	1	0	1	0	1	0	1	0	1	0	1	0	1	0	1	0.857143	#DIV/0!	0	0	0	0.142857	1	0.285714
LTRL590_350052600.1	LtrL590_35:1,733,654..1,734,070(+)	138	417	hypothetical protein, conserved	0	1	0	1	0	1	1	0	1	0	1	0	1	1	0	1	0	1	0	1	0	1	1	0	1	0	1	0	1	0	1	0	1	0	1	0	1	0.857143	#DIV/0!	0	0	0	0.142857	1	0.285714
LTRL590_000027300.1	LTRL590_SCAF000119:271..540(-)	89	270	hypothetical protein	#DIV/0!	0	#DIV/0!	0	#DIV/0!	0	0	0	1	0	1	0	1	1	0	1	0	1	0	1	0	1	1	0	1	0	1	0	1	0	1	0	1	0	1	0	1	0.857143	0	1	1	0	0.142857	0	0.285714
LTRL590_050016800.1	LtrL590_05:446,575..446,973(-)	132	399	prefoldin subunit, putative	#DIV/0!	0	#DIV/0!	0	#DIV/0!	0	0	0	1	0	1	0	1	1	0	1	0	1	0	1	0	1	1	0	1	0	1	0	1	0	1	0	1	0	1	0	1	0.857143	0	1	1	0	0.142857	0	0.285714
LTRL590_070005800.1	LtrL590_07:22,797..23,375(+)	192	579	hypothetical protein, conserved	#DIV/0!	0	#DIV/0!	0	#DIV/0!	0	0	0	1	0	1	0	1	1	0	1	0	1	0	1	0	1	1	0	1	0	1	0	1	0	1	0	1	0	1	0	1	0.857143	0	1	1	0	0.142857	0	0.285714
LTRL590_160007400.1	LtrL590_16:79,566..79,961(-)	131	396	hypothetical protein, conserved	#DIV/0!	0	#DIV/0!	0	#DIV/0!	0	0	0	1	0	1	0	1	1	0	1	0	1	0	1	0	1	1	0	1	0	1	0	1	0	1	0	1	0	1	0	1	0.857143	0	1	1	0	0.142857	0	0.285714
LTRL590_190021400.1	LtrL590_19:652,315..652,575(-)	86	261	hypothetical protein	#DIV/0!	0	#DIV/0!	0	#DIV/0!	0	0	0	1	0	1	0	1	1	0	1	0	1	0	1	0	1	1	0	1	0	1	0	1	0	1	0	1	0	1	0	1	0.857143	0	1	1	0	0.142857	0	0.285714
LTRL590_200018200.1	LtrL590_20:548,062..548,463(+)	133	402	Domain of unknown function (DUF1935), putative	#DIV/0!	1	#DIV/0!	1	#DIV/0!	1	1	1	2	1	2	1	2	2	1	2	1	2	1	2	1	2	2	1	2	1	2	1	2	1	2	1	2	1	2	1	2	1.85714	1	2	1	0	0.142857	0	0.285714
LTRL590_210006300.1	LtrL590_21:29,846..30,301(+)	151	456	hypothetical protein, conserved	#DIV/0!	0	#DIV/0!	0	#DIV/0!	0	0	0	1	0	1	0	1	1	0	1	0	1	0	1	0	1	1	0	1	0	1	0	1	0	1	0	1	0	1	0	1	0.857143	0	1	1	0	0.142857	0	0.285714
LTRL590_230020600.1	LtrL590_23:560,905..561,276(+)	123	372	hypothetical protein, conserved	#DIV/0!	0	#DIV/0!	0	#DIV/0!	0	0	0	1	0	1	0	1	1	0	1	0	1	0	1	0	1	1	0	1	0	1	0	1	0	1	0	1	0	1	0	1	0.857143	0	1	1	0	0.142857	0	0.285714
LTRL590_300012200.1	LtrL590_30:218,268..218,864(-)	198	597	hypothetical protein, conserved	0	1	0	1	0	1	1	#DIV/0!	2	#DIV/0!	2	#DIV/0!	2	2	1	2	1	2	1	2	1	2	2	#DIV/0!	2	1	2	1	2	1	2	1	2	1	2	1	2	1.85714	1	2	1	0	0.142857	0	0.285714
LTRL590_360037800.1	LtrL590_36:1,186,309..1,186,722(-)	137	414	40S ribosomal protein S24e	#DIV/0!	0	#DIV/0!	0	#DIV/0!	0	0	0	1	0	1	0	1	1	0	1	0	1	0	1	0	1	1	0	1	0	1	0	1	0	1	0	1	0	1	0	1	0.857143	0	1	1	0	0.142857	0	0.285714
LTRL590_360046300.1	LtrL590_36:1,424,612..1,424,977(-)	121	366	hypothetical protein, conserved	#DIV/0!	0	#DIV/0!	0	#DIV/0!	0	0	0	1	0	1	0	1	1	0	1	0	1	0	1	0	1	1	0	1	0	1	0	1	0	1	0	1	0	1	0	1	0.857143	0	1	1	0	0.142857	0	0.285714
LTRL590_350012300.1	LtrL590_35:262,067..262,759(+)	230	693	proteasome activator protein pa26, putative	0	2	0	2	0	2	2	0.5	3	0.5	3	0.5	3	3	0	2	0	2	0	2	0	2	2	0.5	3	0	2	0	2	0	2	0	2	0	2	0	2	1.85714	0	1	1	1	1.14286	2	1.28571
LTRL590_270017000.1	LtrL590_27:480,193..480,897(-)	234	705	gBP21, MRP1	0	1	0	1	0	1	1	#DIV/0!	3	#DIV/0!	3	0.5	3	3	0	2	0	2	0	2	0	2	2	#DIV/0!	3	0	2	0	2	0	2	0	2	0	2	0	2	1.85714	0	2	2	1	1.14286	1	1.28571
LTRL590_330015100.1	LtrL590_33:301,958..302,617(+)	219	660	40S ribosomal protein S3, putative	0	1	0	1	0	1	1	0	1	0	2	0	4	2.33333	0	1	0	1	0	1	0	1	1	0	2	0	1	0	1	0	1	0	1	#DIV/0!	0	0	1	0.857143	#DIV/0!	0	1.33333	1.33333	1.47619	2.33333	1.61905
LTRL590_260020800.1	LtrL590_26:570,422..572,479(+)	685	2058	thimet oligopeptidase, putative	0	4	0	4	0	4	4	0.333333	8	0.333333	8	0.25	5	7	0	5	0	5	0	5	0	5	5	0.333333	8	0	5	0	6	0	5	0	5	0	5	0	5	4.85714	0	5	3	2	2.14286	2	2.28571
LTRL590_270005200.1	LtrL590_27:4,276..5,400(-)	374	1125	hypothetical protein, conserved	0.8	9	0.571429	11	0.666667	10	10	0.666667	5	0.666667	5	0.333333	4	4.66667	0.714286	12	0.571429	11	0.714286	12	#DIV/0!	1	9	0.666667	5	0.714286	12	0.833333	11	0.714286	12	0.714286	12	0.833333	11	0.714286	12	9.10204	0.8	9	-5.33333	-4.33333	-4.43537	-4.33333	-4.60884
LTRL590_360052600.1	LtrL590_36:1,608,375..1,609,397(+)	340	1023	oxidoreductase, putative	0	2	0	2	0	2	2	#DIV/0!	0	#DIV/0!	0	#DIV/0!	0	0	0	2	0	2	0	2	0	2	2	#DIV/0!	0	0	2	0	2	0	2	0	2	0	2	0	2	1.42857	0	1	-2	-2	-1.42857	-1	-1.60714
LTRL590_000014300.1	LTRL590_SCAF000080:4,481..4,833(+)	117	351	hypothetical protein	0	1	0	1	0	1	1	#DIV/0!	0	#DIV/0!	0	0	1	0.333333	0	2	0	2	0	2	0	2	2	#DIV/0!	0	0	2	0	2	0	2	0	2	0	2	0	2	1.42857	0	2	-0.666667	-1.66667	-1.09524	-1.66667	-1.27381
LTRL590_200007000.1	LtrL590_20:64,923..65,525(-)	200	603	hypothetical protein, conserved	2	3	2	3	2	3	3	0	3	0	3	0	2	2.66667	1	4	1	4	1	4	1	4	4	0	3	1	4	1	4	1	4	1	4	1	4	1	4	3.42857	1	4	-0.333333	-1.33333	-0.761905	-1.33333	-0.940476
LTRL590_320047200.1	LtrL590_32:1,521,885..1,522,667(+)	260	783	60S ribosomal protein L2, putative	0	5	0	3	0	4	4	0	5	0	4	0	4	4.33333	0	4	0	4	0	4	0	4	4	0	4	0	4	0	4	0	4	0	4	0	4	0	4	3.42857	0	3	0.333333	0.333333	0.904762	1.33333	0.72619
LTRL590_320013200.1	LtrL590_32:268,837..269,544(+)	235	708	RNA binding protein, putative	0	1	0	1	0	1	1	0	1	0	1	0	2	1.33333	0	2	0	2	0	2	0	2	2	0	1	0	2	0	2	0	2	0	2	0	2	0	2	1.57143	0	1	0.333333	-0.666667	-0.238095	0.333333	-0.0595238
LTRL590_250024300.1	LtrL590_25:687,537..688,589(-)	350	1053	pyruvate dehydrogenase E1 beta subunit, putative	2	3	2	3	2	3	3	#DIV/0!	2	#DIV/0!	2	2	6	3.33333	3	4	3	4	#DIV/0!	0	3	4	3	#DIV/0!	2	3	4	3	4	3	4	3	4	3	4	3	4	3.57143	3	4	0.333333	0.333333	-0.238095	-0.666667	-0.0595238
LTRL590_040015200.1	LtrL590_04:387,341..387,925(-)	194	585	COPI associated protein, putative	1	4	1	4	1	4	4	0.5	3	0.5	3	1	4	3.33333	1	4	1	4	1	4	1	4	4	0.5	3	1	4	1	4	1	4	1	4	1	4	1	4	3.42857	2	3	-0.666667	-0.666667	-0.0952381	0.333333	-0.27381
LTRL590_220020400.1	LtrL590_22:595,818..596,909(+)	363	1092	exosome complex exonuclease RRP45 homolog, putative	0.666667	5	0.75	7	0.5	6	6	1	8	1	8	0.5	9	8.33333	0.666667	5	0.666667	5	0.666667	5	0.666667	5	5	1	8	0.666667	5	1.33333	7	0.666667	5	0.666667	5	0.666667	5	0.666667	5	5.09524	0.666667	5	2.33333	3.33333	3.2381	3.33333	3.05952
LTRL590_280007800.1	LtrL590_28:90,176..90,826(+)	216	651	hypothetical protein, conserved	0.333333	4	0.333333	4	0.333333	4	4	0.75	7	0.75	7	1	6	6.66667	0.333333	4	0.333333	4	0.333333	4	#DIV/0!	0	3	0.75	7	0.333333	4	0.333333	4	0.333333	4	0.333333	4	0.333333	4	0.333333	4	3.90476	0.333333	4	2.66667	3.66667	2.7619	2.66667	2.94048
LTRL590_050006100.1	LtrL590_05:34,081..35,097(+)	338	1017	hypothetical protein, conserved	1.5	5	1.5	5	2	6	5.33333	1	4	1	4	#DIV/0!	3	3.66667	1.33333	7	1.33333	7	1.33333	7	1.5	5	6.5	1	4	1.33333	7	1.33333	7	1.33333	7	1.33333	7	1.33333	7	1.33333	7	5.7619	1	6	-1.66667	-2.83333	-2.09524	-2.33333	-2.23214
LTRL590_300026200.1	LtrL590_30:731,943..732,569(+)	208	627	Domain of unknown function (DUF814), putative	0.5	3	0.333333	4	0.333333	4	3.66667	0	1	0	1	0	1	1	0.333333	4	0.333333	4	0.333333	4	0.333333	4	4	0	1	0.333333	4	0.333333	4	0.333333	4	0.333333	4	0.333333	4	0.333333	4	3.04762	0.5	3	-2.66667	-3	-2.04762	-2	-2.42857
LTRL590_280026700.1	LtrL590_28:806,365..806,883(-)	172	519	ribose 5-phosphate isomerase, putative	2	3	2	3	1	2	2.66667	1	2	1	2	1	2	2	1	2	1	2	1	2	#DIV/0!	0	1.5	1	2	1	2	1	2	1	2	1	2	1	2	1	2	1.85714	1	2	-0.666667	0.5	0.142857	0	-0.00595238
LTRL590_030011300.1	LtrL590_03:228,194..229,243(+)	349	1050	kinase-like protein	0.2	6	0.333333	4	0.25	5	5	1.25	9	1	8	0.4	7	8	0.333333	4	0.333333	4	0.333333	4	0.333333	4	4	1	8	0.333333	4	0.333333	4	0.333333	4	0.333333	4	0.333333	4	0.333333	4	4.04762	0.333333	4	3	4	3.95238	4	3.7381
LTRL590_090022400.1	LtrL590_09:563,051..563,416(-)	121	366	hypothetical protein, conserved	2	3	#DIV/0!	1	2	3	2.33333	0	4	0	4	0	4	4	0	3	0	3	0	3	0.333333	4	3.25	0	4	0.333333	4	0.333333	4	0.333333	4	0.333333	4	0.333333	4	0.333333	4	3.47619	0.5	3	1.66667	0.75	0.52381	1	0.985119
LTRL590_360052700.1	LtrL590_36:1,611,809..1,613,209(+)	466	1401	UDP-N-acetylglucosamine-dolichyl-phosphate N-acetylglucosaminephosphotransferase, putative	0.5	6	0.5	6	0.5	6	6	0.857143	13	0.857143	13	0.6	8	11.3333	0.75	7	0.75	7	0.75	7	0.75	7	7	0.857143	13	0.75	7	0.75	7	0.75	7	0.75	7	0.75	7	0.75	7	6.96429	0.75	7	5.33333	4.33333	4.36905	4.33333	4.59226
LTRL590_340027300.1	LtrL590_34:856,722..857,153(-)	143	432	clathrin coat assembly protein AP17, putative	#DIV/0!	0	0	1	#DIV/0!	0	0.333333	0	3	0	3	0	2	2.66667	#DIV/0!	0	#DIV/0!	0	#DIV/0!	0	0	1	0.25	0	3	0	1	0	1	0	1	0	1	0	1	0	1	1.14286	#DIV/0!	0	2.33333	2.41667	1.52381	2.66667	2.23512
LTRL590_340032800.1	LtrL590_34:1,083,949..1,084,470(+)	173	522	40S ribosomal protein S19-like protein	0	2	0	3	0	2	2.33333	0.25	5	0.25	5	0	3	4.33333	0	2	0	2	0	2	0	3	2.25	0.25	5	0	4	0	4	0	4	0	4	0	1	0	4	3.14286	0	2	2	2.08333	1.19048	2.33333	1.90179
LTRL590_100015000.1	LtrL590_10:306,431..307,102(+)	223	672	Protein of unknown function (DUF1861), putative	0.5	3	0	4	0.5	3	3.33333	0	4	0	4	0.5	3	3.66667	0	3	0	3	0	3	0.25	5	3.5	0	4	0.25	5	0.25	5	0.25	5	0.25	5	0.25	5	0.25	5	4.17857	0	3	0.333333	0.166667	-0.511905	0.666667	0.16369
LTRL590_350005800.1	LtrL590_35:23,948..24,865(-)	305	918	prohibitin, putative	0.5	3	0.5	3	0.5	3	3	#DIV/0!	1	#DIV/0!	1	#DIV/0!	0	0.666667	0.5	3	0.5	3	0.5	3	0.5	3	3	#DIV/0!	1	0.5	3	0.5	3	0.5	3	0.5	3	0.5	3	0.5	3	2.35714	1	2	-2.33333	-2.33333	-1.69048	-1.33333	-1.92262
LTRL590_060017500.1	LtrL590_06:479,861..480,319(+)	152	459	Thioredoxin, putative	0	2	0	1	0	1	1.33333	0	2	0	2	#DIV/0!	0	1.33333	#DIV/0!	1	1	2	1	2	1	2	1.75	0	2	1	2	0.333333	4	1	2	1	2	1	2	1	2	2.14286	#DIV/0!	1	0	-0.416667	-0.809524	0.333333	-0.223214
LTRL590_260026800.1	LtrL590_26:829,567..829,908(+)	113	342	hypothetical protein, conserved	0	2	0	1	0	1	1.33333	0.333333	4	0.333333	4	1	2	3.33333	1	2	1	2	1	2	#DIV/0!	1	1.75	0.333333	4	1	2	1	2	1	2	1	2	1	2	1	2	2.14286	0	1	2	1.58333	1.19048	2.33333	1.77679
LTRL590_340018400.1	LtrL590_34:510,240..511,592(-)	450	1353	hypothetical protein, conserved	0.5	6	0.5	6	0.5	6	6	0.5	3	0.5	3	0.5	3	3	0.666667	5	0.666667	5	0.666667	5	0.75	7	5.5	0.5	3	0.5	6	0.75	7	0.5	6	0.5	6	0.5	6	0.5	6	4.92857	0.666667	5	-3	-2.5	-1.92857	-2	-2.35714
LTRL590_040016500.1	LtrL590_04:422,823..423,878(-)	351	1056	Fructose-1-6-bisphosphatase, putative	0	1	0	1	0	1	1	0.333333	4	0.333333	4	0.25	5	4.33333	0	2	0	2	0	2	0	2	2	0.333333	4	0	2	0	2	0	2	0	2	0	2	0	2	2	0	2	3.33333	2.33333	2.33333	2.33333	2.58333
LTRL590_210023600.1	LtrL590_21:652,527..653,834(-)	435	1308	RNA helicase, putative	0.5	3	0.5	3	0.5	3	3	0	3	0	3	0	3	3	0.333333	4	0.333333	4	0.333333	4	0.333333	4	4	0	3	0.333333	4	0.333333	4	0.333333	4	0.333333	4	0.333333	4	0.333333	4	3.33333	0.333333	4	0	-1	-0.333333	-1	-0.583333
LTRL590_320037600.1	LtrL590_32:1,187,325..1,187,702(-)	125	378	tubulin binding cofactor A-like protein	0	1	0	1	0	2	1.33333	2	3	2	3	#DIV/0!	1	2.33333	1	2	1	2	1	2	1	2	2	2	3	1	2	1	2	1	2	1	2	1	2	1	2	2	0	1	1	0.333333	0.333333	1.33333	0.75
LTRL590_130021900.1	LtrL590_13:644,169..644,489(-)	106	321	60S ribosomal protein L44, putative	0	3	0	3	0	3	3	0	1	0	1	0	2	1.33333	0	3	0	3	0	3	0	3	3	0	1	0	3	0	3	0	3	0	3	0	1	0	3	2	0	3	-1.66667	-1.66667	-0.666667	-1.66667	-1.41667
LTRL590_240024300.1	LtrL590_24:652,845..654,185(-)	446	1341	Ssl1-like, putative	1	8	1	8	1	8	8	1.66667	8	1.66667	8	#DIV/0!	4	6.66667	1	8	1	8	1	8	1	8	8	1.66667	8	1	8	1	8	1	8	1	8	1	8	1	8	7	1	8	-1.33333	-1.33333	-0.333333	-1.33333	-1.08333
LTRL590_020006900.1	LtrL590_02:87,635..87,901(-)	88	267	hypothetical protein	3	4	3	4	3	4	4	1.5	5	1.5	5	0.5	3	4.33333	3	4	3	4	3	4	3	4	4	1.5	5	3	4	3	4	3	4	3	4	3	4	3	4	4	2	3	0.333333	0.333333	0.333333	1.33333	0.583333
LTRL590_360043500.1	LtrL590_36:1,343,238..1,343,570(-)	110	333	hypothetical protein	0	1	0	1	0	1	1	#DIV/0!	2	#DIV/0!	2	#DIV/0!	0	1.33333	0	1	0	1	0	1	0	1	1	#DIV/0!	2	0	1	0	1	0	1	0	1	0	1	0	1	1	#DIV/0!	0	0.333333	0.333333	0.333333	1.33333	0.583333
LTRL590_300008500.1	LtrL590_30:94,983..95,429(-)	148	447	hypothetical protein, conserved	1	2	0.5	3	0	1	2	0.5	3	0.5	3	1	2	2.66667	1	2	1	2	1	2	1	2	2	0.5	3	1	2	1	2	1	2	1	2	1	2	1	2	2	#DIV/0!	1	0.666667	0.666667	0.666667	1.66667	0.916667
LTRL590_310018800.1	LtrL590_31:488,939..489,301(-)	120	363	Cytochrome b5-like Heme/Steroid binding domain containing protein, putative	#DIV/0!	2	#DIV/0!	1	#DIV/0!	1	1.33333	2	3	2	3	#DIV/0!	0	2	1	2	1	2	1	2	1	2	2	2	3	1	2	1	2	1	2	1	2	1	2	1	2	2	0	1	0.666667	0	0	1	0.416667
LTRL590_350053800.1	LtrL590_35:1,761,124..1,762,068(+)	314	945	PACRGB	0	1	0	1	0	1	1	0	1	0	1	0.333333	4	2	0	1	0	1	0	1	0	1	1	0	1	0	1	1	2	0	1	0	1	0	1	0	1	1	#DIV/0!	0	1	1	1	2	1.25
LTRL590_100013500.1	LtrL590_10:282,394..282,816(-)	140	423	hypothetical protein, conserved	#DIV/0!	0	0.5	3	#DIV/0!	0	1	0.5	3	0.5	3	1	2	2.66667	1	2	1	2	1	2	1	2	2	0.5	3	1	2	1	2	1	2	1	2	1	2	1	2	2	1	2	1.66667	0.666667	0.666667	0.666667	0.916667
LTRL590_330019200.1	LtrL590_33:462,947..463,450(+)	167	504	Thioredoxin, putative	0	1	0	1	0	1	1	2	3	2	3	1	2	2.66667	1	2	1	2	1	2	1	2	2	2	3	1	2	1	2	1	2	1	2	1	2	1	2	2	1	2	1.66667	0.666667	0.666667	0.666667	0.916667
LTRL590_050015000.1	LtrL590_05:390,963..391,400(-)	145	438	hypothetical protein, conserved	#DIV/0!	0	#DIV/0!	0	#DIV/0!	0	0	1	2	1	2	0	1	1.66667	0	1	0	1	0	1	0	1	1	1	2	0	1	0	1	0	1	0	1	0	1	0	1	1	0	1	1.66667	0.666667	0.666667	0.666667	0.916667
LTRL590_070010100.1	LtrL590_07:207,464..207,793(-)	109	330	hypothetical protein, conserved	#DIV/0!	0	#DIV/0!	0	#DIV/0!	0	0	0	2	0	2	0	1	1.66667	0	1	0	1	0	1	0	1	1	0	2	0	1	0	1	0	1	0	1	0	1	0	1	1	0	1	1.66667	0.666667	0.666667	0.666667	0.916667
LTRL590_230009000.1	LtrL590_23:123,086..123,412(+)	108	327	(H+)-ATPase G subunit, putative	#DIV/0!	0	#DIV/0!	0	#DIV/0!	0	0	0	2	0	2	0	1	1.66667	0	1	0	1	0	1	0	1	1	0	2	0	1	0	1	0	1	0	1	0	1	0	1	1	0	1	1.66667	0.666667	0.666667	0.666667	0.916667
LTRL590_070010300.1	LtrL590_07:210,403..210,876(-)	157	474	3-hydroxyacyl-ACP dehydratase, putative	#DIV/0!	0	#DIV/0!	0	#DIV/0!	0	0	1	2	1	2	1	2	2	0	1	0	1	0	1	0	1	1	1	2	0	1	0	1	0	1	0	1	0	1	0	1	1	0	1	2	1	1	1	1.25
LTRL590_100015600.1	LtrL590_10:328,950..329,792(+)	279	840	Protein of unknown function (DUF1861), putative	#DIV/0!	0	0	3	2	3	2	0.333333	4	0	3	0.666667	5	4	1	2	1	2	1	2	1	2	2	0	3	1	2	1	2	1	2	1	2	1	2	1	2	2	0	1	2	2	2	3	2.25
LTRL590_110014000.1	LtrL590_11:290,483..290,846(+)	120	363	hypothetical protein	#DIV/0!	0	#DIV/0!	0	#DIV/0!	0	0	#DIV/0!	2	#DIV/0!	2	#DIV/0!	2	2	0	1	0	1	0	1	0	1	1	#DIV/0!	2	0	1	0	1	0	1	0	1	0	1	0	1	1	0	1	2	1	1	1	1.25
LTRL590_190018900.1	LtrL590_19:603,406..603,759(+)	117	354	hypothetical protein, conserved	#DIV/0!	0	#DIV/0!	0	#DIV/0!	0	0	0	2	0	2	0	2	2	0	1	0	1	0	1	0	1	1	0	2	0	1	0	1	0	1	0	1	0	1	0	1	1	0	1	2	1	1	1	1.25
LTRL590_240014500.1	LtrL590_24:307,058..307,741(+)	227	684	emp24/gp25L/p24 family/GOLD, putative	1	2	0	2	#DIV/0!	2	2	0.333333	4	0.333333	4	0.333333	4	4	2	3	2	3	2	3	2	3	3	0.333333	4	2	3	2	3	2	3	2	3	2	3	2	3	3	2	3	2	1	1	1	1.25
LTRL590_300038600.1	LtrL590_30:1,161,884..1,163,224(+)	446	1341	Tumour suppressor, Mitostatin, putative	#DIV/0!	0	#DIV/0!	0	#DIV/0!	0	0	0	2	0	2	1	2	2	0	1	0	1	0	1	0	1	1	0	2	0	1	0	1	0	1	0	1	0	1	0	1	1	0	1	2	1	1	1	1.25
LTRL590_310007500.1	LtrL590_31:44,541..45,518(-)	325	978	2OG-Fe(II) oxygenase superfamily, putative	1	4	1	2	0.5	3	3	1.5	5	1.5	5	0.666667	5	5	3	4	3	4	3	4	3	4	4	1.5	5	3	4	3	4	3	4	3	4	3	4	3	4	4	3	4	2	1	1	1	1.25
LTRL590_330022200.1	LtrL590_33:603,092..603,481(+)	129	390	RNA-binding protein, putative	#DIV/0!	0	#DIV/0!	0	#DIV/0!	0	0	0	2	0	2	0	2	2	0	1	0	1	0	1	0	1	1	0	2	0	1	0	1	0	1	0	1	0	1	0	1	1	0	1	2	1	1	1	1.25
LTRL590_360040600.1	LtrL590_36:1,260,126..1,260,491(-)	121	366	hypothetical protein	0	1	0	1	0	1	1	1	4	1	4	0	1	3	0	2	0	2	0	2	0	2	2	1	4	0	2	0	2	0	2	0	2	0	2	0	2	2	0	2	2	1	1	1	1.25
LTRL590_360055600.1	LtrL590_36:1,751,317..1,751,799(+)	160	483	hypothetical protein, conserved	0	2	0	2	0	2	2	0.333333	4	0.333333	4	0.333333	4	4	0	2	0	2	0	2	0	2	2	0.333333	4	0	2	0	2	0	2	0	2	0	2	0	2	2	0	1	2	2	2	3	2.25
LTRL590_360059000.1	LtrL590_36:1,877,925..1,878,395(+)	156	471	PIG-P, putative	0	1	0	1	0	1	1	0.333333	4	0.333333	4	0	1	3	0	2	0	2	0	2	0	2	2	0.333333	4	0	2	0	2	0	2	0	2	0	2	0	2	2	0	2	2	1	1	1	1.25
LTRL590_210009000.1	LtrL590_21:113,740..114,411(+)	223	672	Protein of unknown function, DUF607, putative	#DIV/0!	0	#DIV/0!	0	#DIV/0!	0	0	0	2	0	2	0.5	3	2.33333	0	1	0	1	0	1	0	1	1	0	2	0	1	0	1	0	1	0	1	0	1	0	1	1	0	1	2.33333	1.33333	1.33333	1.33333	1.58333
LTRL590_290023200.1	LtrL590_29:777,125..777,397(-)	90	273	hypothetical protein	0	1	0	1	0	1	1	#DIV/0!	4	#DIV/0!	4	#DIV/0!	2	3.33333	1	2	1	2	1	2	0	2	2	#DIV/0!	4	0	2	0	2	0	2	0	2	0	2	0	2	2	0	2	2.33333	1.33333	1.33333	1.33333	1.58333
LTRL590_360047800.1	LtrL590_36:1,460,404..1,461,048(+)	214	645	60S ribosomal protein L10a, putative	#DIV/0!	0	#DIV/0!	0	#DIV/0!	0	0	0	3	0	3	0	1	2.33333	0	1	0	1	0	1	0	1	1	0	3	0	1	0	1	0	1	0	1	#DIV/0!	0	0	1	1	0	1	2.33333	1.33333	1.33333	1.33333	1.58333
LTRL590_160021400.1	LtrL590_16:628,507..630,306(-)	599	1800	paraflagellar rod protein 1D, putative	#DIV/0!	0	#DIV/0!	0	1	2	0.666667	#DIV/0!	1	#DIV/0!	1	0	2	1.33333	#DIV/0!	0	#DIV/0!	0	#DIV/0!	0	#DIV/0!	0	0	#DIV/0!	1	1	2	0	1	0	1	1	2	#DIV/0!	0	0	1	1	#DIV/0!	0	0.666667	1.33333	0.333333	1.33333	0.916667
LTRL590_350009800.1	LtrL590_35:142,095..142,520(+)	141	426	hypothetical protein, conserved	2	6	1.5	5	1.5	5	5.33333	0	3	0	3	0.5	3	3	2	6	2	6	2	6	2	6	6	0	3	2	6	2	6	2	6	2	6	2	6	2	6	5	2	6	-2.33333	-3	-2	-3	-2.58333
LTRL590_280030200.1	LtrL590_28:920,319..920,987(+)	222	669	glycosomal membrane protein, putative	0.333333	4	0	3	0	3	3.33333	0	2	0	2	0	4	2.66667	0	3	0	3	0	3	#DIV/0!	0	2.25	0	2	0	3	0	3	0	3	0	3	0	3	0	3	2.42857	0	3	-0.666667	0.416667	0.238095	-0.333333	-0.0863095
LTRL590_250027900.1	LtrL590_25:798,687..799,796(-)	369	1110	Stage II sporulation protein E (SpoIIE), putative	0.5	6	0.5	6	0.4	7	6.33333	0	1	0	1	0	2	1.33333	0.4	7	0.4	7	0	1	0.4	7	5.5	0	1	0.4	7	0.4	7	0.4	7	0.4	7	0.4	7	0.4	7	5.2	0.5	6	-5	-4.16667	-3.86667	-4.66667	-4.425
LTRL590_250030300.1	LtrL590_25:851,024..852,385(+)	453	1362	hypothetical protein, conserved	0.25	5	0	4	0	4	4.33333	0.285714	9	0.285714	9	0.166667	7	8.33333	0	6	0	6	0	2	0	6	5	0.285714	9	0	6	0	6	0	6	0	6	0	6	0	6	5.57143	0	5	4	3.33333	2.7619	3.33333	3.35714
LTRL590_350030600.1	LtrL590_35:964,021..965,037(+)	338	1017	hypothetical protein, conserved	0.75	7	1	8	0.6	8	7.66667	0.5	6	0.5	6	0.5	9	7	1	8	1	8	1.33333	7	1	8	7.75	0.5	6	1	8	1	8	1	8	1	8	1	8	1	8	6.71429	0.75	7	-0.666667	-0.75	0.285714	0	-0.282738
LTRL590_230008600.1	LtrL590_23:111,398..112,870(+)	490	1473	tryptophanyl-tRNA synthetase, putative	2	6	2	6	1.5	5	5.66667	2.5	7	2.5	7	1.5	5	6.33333	1.33333	7	1.33333	7	1.33333	7	1	2	5.75	2.5	7	1.33333	7	1.33333	7	1	2	1	2	1	2	1.33333	7	4.71429	1.5	5	0.666667	0.583333	1.61905	1.33333	1.0506
LTRL590_320014300.1	LtrL590_32:312,558..313,397(+)	279	840	CYC2-like cyclin, putative	0.5	3	0.5	3	0.5	3	3	4	5	4	5	1	4	4.66667	1	4	1	4	1	4	1	4	4	4	5	1	4	1	4	1	4	1	4	1	4	1	4	3.71429	0.5	3	1.66667	0.666667	0.952381	1.66667	1.2381
LTRL590_190017700.1	LtrL590_19:561,391..561,606(+)	71	216	hypothetical protein	#DIV/0!	1	#DIV/0!	1	#DIV/0!	1	1	0	1	0	1	#DIV/0!	0	0.666667	1	2	1	2	1	2	1	2	2	0	1	1	2	1	2	1	2	1	2	1	2	1	2	1.71429	#DIV/0!	1	-0.333333	-1.33333	-1.04762	-0.333333	-0.761905
LTRL590_360016000.1	LtrL590_36:397,313..397,819(+)	168	507	40S ribosomal protein S10, putative	0	1	0	1	0	1	1	0	2	0	2	0	3	2.33333	0	2	0	2	0	1	0.5	3	2	0	2	0	2	0	2	0	2	0	2	0	2	0	2	1.71429	0	1	1.33333	0.333333	0.619048	1.33333	0.904762
LTRL590_360040300.1	LtrL590_36:1,251,602..1,252,399(-)	265	798	lipoate protein ligase, putative	#DIV/0!	1	#DIV/0!	1	#DIV/0!	1	1	0	1	0	1	0	1	1	1	2	1	2	1	2	1	2	2	0	1	1	2	1	2	1	2	1	2	1	2	1	2	1.71429	0	1	0	-1	-0.714286	0	-0.428571
LTRL590_350018700.1	LtrL590_35:491,332..491,997(+)	221	666	Iron-sulfur assembly protein 2, putative	0.666667	5	0.666667	5	0.666667	5	5	2	6	2	6	1.5	5	5.66667	1	6	1	6	1	6	1	6	6	2	6	1	6	1	6	1	6	1	6	1	6	1	6	5.28571	1	6	0.666667	-0.333333	0.380952	-0.333333	0.0952381
LTRL590_340009600.1	LtrL590_34:153,923..154,285(+)	120	363	ribosomal protein S25	#DIV/0!	0	#DIV/0!	0	#DIV/0!	0	0	0	2	0	1	0	1	1.33333	0	1	0	1	0	1	0	1	1	0	1	0	1	0	1	0	1	0	1	#DIV/0!	0	0	1	0.714286	#DIV/0!	0	1.33333	0.333333	0.619048	1.33333	0.904762
LTRL590_080011000.1	LtrL590_08:227,342..228,379(+)	345	1038	eukaryotic translation initiation factor 2 beta subunit, putative	1	4	1	6	0.666667	5	5	0.222222	11	0.222222	11	0.4	7	9.66667	1	4	1	4	1	4	1	4	4	0.222222	11	1	4	0.666667	5	1	4	1	4	1	4	1	4	4.71429	1	4	4.66667	5.66667	4.95238	5.66667	5.2381
LTRL590_180014300.1	LtrL590_18:386,110..386,781(+)	223	672	rab7 GTP binding protein, putative	0	2	0	4	0	3	3	0	1	0	1	0	2	1.33333	0	3	0	3	0	3	0	3	3	0	1	0	3	0	3	0	3	0	3	0	3	0	3	2.28571	0	2	-1.66667	-1.66667	-0.952381	-0.666667	-1.2381
LTRL590_300014900.1	LtrL590_30:287,077..288,114(+)	345	1038	adenosine kinase, putative	2	3	2	3	2	3	3	1	2	1	2	1.5	5	3	1	4	1	4	1	4	1	4	4	1	2	1	4	1	4	1	4	1	4	1	4	1	4	3.28571	1	4	0	-1	-0.285714	-1	-0.571429
LTRL590_280031000.1	LtrL590_28:951,324..952,181(+)	285	858	hypothetical protein, conserved	1	4	1	4	1	4	4	0	2	0	2	0	1	1.66667	1	4	1	4	1	4	#DIV/0!	0	3	0	2	1	4	1	4	1	4	1	4	1	4	1	4	3.28571	1	4	-2.33333	-1.33333	-1.61905	-2.33333	-1.90476
LTRL590_180011400.1	LtrL590_18:262,732..262,992(+)	86	261	40S ribosomal protein S27-1, putative	0	2	0	2	0	2	2	#DIV/0!	0	#DIV/0!	0	#DIV/0!	0	0	0	2	0	2	0	2	0	2	2	#DIV/0!	0	0	2	0	2	0	2	0	2	0	1	0	2	1.28571	0	1	-2	-2	-1.28571	-1	-1.57143
LTRL590_180011700.1	LtrL590_18:269,336..269,980(+)	214	645	60S ribosomal protein L10a, putative	#DIV/0!	0	#DIV/0!	0	#DIV/0!	0	0	0	3	0	3	0	2	2.66667	0	1	0	1	#DIV/0!	0	0	1	0.75	0	3	0	1	0	1	0	1	0	1	0	1	0	1	1.14286	0	1	2.66667	1.91667	1.52381	1.66667	1.94345
LTRL590_080012400.1	LtrL590_08:300,067..300,942(+)	291	876	tuzin, putative	1	2	1	4	2	3	3	1	2	1	2	1	2	2	1	2	1	2	1	2	2	3	2.25	1	2	1	2	1	2	1	2	1	2	1	2	1	2	1.85714	1	2	-1	-0.25	0.142857	0	-0.276786
LTRL590_260013600.1	LtrL590_26:260,501..260,950(-)	149	450	40S ribosomal protein S16, putative	0	1	0	1	0	1	1	0	1	0	1	0	2	1.33333	1	2	0	1	0	1	0	1	1.25	0	1	0	1	0	1	0	1	0	1	0	1	0	1	0.857143	1	2	0.333333	0.0833333	0.47619	-0.666667	0.0565476
LTRL590_350011600.1	LtrL590_35:242,170..244,272(+)	700	2103	Tetratricopeptide repeat, putative	1	6	0.75	7	1	6	6.33333	1.5	5	1.5	5	0.5	3	4.33333	1	6	1	6	1	6	1	6	6	1.5	5	1	6	1	6	1	6	1	6	1	6	1	6	5.14286	1	6	-2	-1.66667	-0.809524	-1.66667	-1.53571
LTRL590_300013200.1	LtrL590_30:241,654..242,493(+)	279	840	hypothetical protein, conserved	0.666667	5	0.333333	4	0.333333	4	4.33333	0	2	0	2	0.333333	4	2.66667	0	4	0	4	0	4	0	4	4	0	2	0	4	0	4	0	4	0	4	0	4	0	4	3.14286	0	4	-1.66667	-1.33333	-0.47619	-1.33333	-1.20238
LTRL590_260020500.1	LtrL590_26:552,662..553,855(+)	397	1194	Glutaredoxin, putative	2	3	3	4	3	4	3.66667	5	6	5	6	#DIV/0!	4	5.33333	3	4	3	4	3	4	3	4	4	5	6	3	4	3	4	3	4	3	4	3	4	3	4	4.14286	2	3	1.66667	1.33333	1.19048	2.33333	1.63095
LTRL590_310020500.1	LtrL590_31:555,482..555,736(-)	84	255	hypothetical protein	0	1	#DIV/0!	1	#DIV/0!	0	0.666667	1	2	1	2	#DIV/0!	0	1.33333	#DIV/0!	1	#DIV/0!	1	#DIV/0!	2	#DIV/0!	0	1	1	2	#DIV/0!	0	0	1	0	1	0	1	#DIV/0!	2	#DIV/0!	2	1.14286	#DIV/0!	0	0.666667	0.333333	0.190476	1.33333	0.630952
LTRL590_320019600.1	LtrL590_32:518,225..519,040(+)	271	816	polypeptide deformylase-like protein, putative	0	5	0	5	0	4	4.66667	0.25	5	0.25	5	0.333333	4	4.66667	0	6	0	6	0	6	0	2	5	0.25	5	0	6	0.166667	7	0	6	0	6	0	6	0	6	5.14286	0	4	0	-0.333333	-0.47619	0.666667	-0.0357143
LTRL590_240024200.1	LtrL590_24:651,368..652,192(-)	274	825	hypothetical protein, conserved	1	4	0.666667	5	1	4	4.33333	0	1	0	1	#DIV/0!	0	0.666667	1	4	1	4	1	4	1	4	4	0	1	1	4	1	4	1	4	1	4	1	4	1	4	3.14286	1	4	-3.66667	-3.33333	-2.47619	-3.33333	-3.20238
LTRL590_350007000.1	LtrL590_35:47,720..48,442(+)	240	723	NLI interacting factor-like phosphatase, putative	0	5	0	4	0	4	4.33333	0	2	0	2	0	1	1.66667	0	4	0	4	0	4	0	4	4	0	2	0	4	0	4	0	4	0	4	0	4	0	4	3.14286	0	4	-2.66667	-2.33333	-1.47619	-2.33333	-2.20238
LTRL590_280035300.1	LtrL590_28:1,103,939..1,105,411(-)	490	1473	hypothetical protein, conserved	2.4	17	2.8	19	2.33333	20	18.6667	3.5	18	3.5	18	3.33333	13	16.3333	3	24	2.83333	23	2.83333	23	5	6	19	3.5	18	2.83333	23	2.83333	23	3	24	3	24	3	24	3	24	19.8571	2.8	19	-2.33333	-2.66667	-3.52381	-2.66667	-2.79762
LTRL590_350035100.1	LtrL590_35:1,116,779..1,118,635(-)	618	1857	dolichol kinase, putative	2	9	1.5	10	2	9	9.33333	0.666667	10	0.666667	10	1.2	11	10.3333	2	9	2	9	2	9	2	9	9	0.666667	10	2	9	2	9	2	9	2	9	2	9	2	9	8.14286	2	9	1	1.33333	2.19048	1.33333	1.46429
LTRL590_360044100.1	LtrL590_36:1,352,661..1,353,746(-)	361	1086	vacuolar protein sorting-associated protein-like protein	0.5	3	1	2	0.5	3	2.66667	0.25	5	0.25	5	0.2	6	5.33333	2	3	2	3	2	3	2	3	3	0.25	5	2	3	2	3	2	3	2	3	2	3	2	3	3.14286	1	2	2.66667	2.33333	2.19048	3.33333	2.63095
LTRL590_100015400.1	LtrL590_10:314,694..315,659(+)	321	966	Protein of unknown function (DUF1861), putative	0.5	6	1	4	0.666667	5	5	1	4	1	4	1.5	5	4.33333	0.5	6	0.5	6	0.5	6	0.5	6	6	1	4	0.5	6	0.5	6	0.5	6	0.5	6	0.5	6	0.5	6	4.92857	0.666667	5	-0.666667	-1.66667	-0.595238	-0.666667	-0.89881
LTRL590_240029600.1	LtrL590_24:846,978..847,718(-)	246	741	Pentatricopeptide repeat domain containing protein, putative	1	2	1	2	1	2	2	0	3	0	3	#DIV/0!	0	2	2	3	2	3	2	3	1	2	2.75	0	3	1	2	1	2	1	2	1	2	1	2	1	2	2	2	3	0	-0.75	0	-1	-0.4375
LTRL590_250017800.1	LtrL590_25:455,532..456,029(-)	165	498	cytochrome c oxidase VII, putative	0	1	0	1	0	1	1	0.5	3	0.5	3	0.25	5	3.66667	1	2	1	2	#DIV/0!	1	1	2	1.75	0.5	3	1	2	1	2	1	2	1	2	1	2	1	2	2	#DIV/0!	1	2.66667	1.91667	1.66667	2.66667	2.22917
LTRL590_250023200.1	LtrL590_25:652,642..653,622(-)	326	981	hypothetical protein, conserved	0	1	0	1	0	1	1	0	4	0	4	0.25	5	4.33333	0	2	0	2	0	1	0	2	1.75	0	4	0	2	0	2	0	2	0	2	0	2	0	2	2	0	1	3.33333	2.58333	2.33333	3.33333	2.89583
LTRL590_010006300.1	LtrL590_01:36,150..36,398(-)	82	249	hypothetical protein, conserved	#DIV/0!	0	#DIV/0!	0	#DIV/0!	0	0	0	2	0	2	0	1	1.66667	#DIV/0!	0	#DIV/0!	0	#DIV/0!	0	0	1	0.25	0	2	0	1	0	1	0	1	0	1	0	1	0	1	1	0	1	1.66667	1.41667	0.666667	0.666667	1.10417
LTRL590_330028200.1	LtrL590_33:814,995..817,727(+)	910	2733	hypothetical protein, conserved	0	2	#DIV/0!	0	#DIV/0!	1	1	0.25	5	0.25	5	0	4	4.66667	0	2	0	2	0	1	0	2	1.75	0.25	5	0	2	0	2	0	2	0	2	0	1	0	2	2	0	1	3.66667	2.91667	2.66667	3.66667	3.22917
LTRL590_290005300.1	LtrL590_29:8,764..10,167(-)	467	1404	ribosomal protein L3-like protein	0	2	#DIV/0!	0	0	1	1	0.666667	5	0.666667	5	0.666667	5	5	0	2	0	2	0	2	#DIV/0!	0	1.5	0.666667	5	0	2	0	2	0	2	0	2	0	2	0	2	2.14286	0	2	4	3.5	2.85714	3	3.33929
LTRL590_220015900.1	LtrL590_22:437,103..437,516(+)	137	414	ChaC-like protein, putative	0.5	3	0.5	3	0.5	3	3	#DIV/0!	0	#DIV/0!	0	#DIV/0!	0	0	0.5	3	0.5	3	0.5	3	0.5	3	3	#DIV/0!	0	0.5	3	0.5	3	0.5	3	0.5	3	0.5	3	0.5	3	2.21429	1	2	-3	-3	-2.21429	-2	-2.55357
LTRL590_180020700.1	LtrL590_18:715,496..716,587(+)	363	1092	UAA transporter family, putative	0.25	5	0.25	5	0.25	5	5	0.5	6	0.5	6	0.5	6	6	0.5	6	0.5	6	0.5	6	0.5	6	6	0.5	6	0.5	6	0.5	6	0.5	6	0.5	6	0.5	6	0.5	6	5.21429	0.5	6	1	0	0.785714	0	0.446429
LTRL590_000022700.1	LTRL590_SCAF000112:87,425..88,849(+)	474	1425	Nucleolar protein 56, putative	1	2	1	2	1	2	2	0	1	0	1	0	2	1.33333	0	2	0	2	0	2	0	2	2	0	1	0.333333	4	0.333333	4	0.333333	4	0.333333	4	0.333333	4	0.333333	4	3.04762	0	2	-0.666667	-0.666667	-1.71429	-0.666667	-0.928571
LTRL590_270011100.1	LtrL590_27:224,625..226,406(+)	593	1782	Domain of unknown function (DUF4470)/Domain of unknown function (DUF4471), putative	1.5	5	1	16	1.5	5	8.66667	1	16	1.125	17	0.75	14	15.6667	0.666667	10	0.8	9	0.666667	10	0.666667	10	9.75	1.125	17	0.666667	10	0.666667	10	0.666667	10	0.666667	10	0.666667	10	0.666667	10	9.66667	0.5	9	7	5.91667	6	6.66667	6.39583
LTRL590_050006000.1	LtrL590_05:32,711..33,082(+)	123	372	hypothetical protein, conserved	0	1	#DIV/0!	0	0	1	0.666667	0.5	3	0.5	3	0	2	2.66667	0	2	0	2	0	2	#DIV/0!	0	1.5	0.5	3	0	2	0	2	0	2	0	2	0	2	0	2	1.85714	0	1	2	1.16667	0.809524	1.66667	1.41071
LTRL590_280005100.1	LtrL590_28:5,299..5,700(+)	133	402	hypothetical protein, conserved	0.5	3	0	2	0	2	2.33333	1	2	1	2	#DIV/0!	0	1.33333	0.5	3	0.5	3	0.5	3	#DIV/0!	0	2.25	1	2	0	2	0	2	0	2	0	2	0	2	0	2	1.71429	0.5	3	-1	-0.916667	-0.380952	-1.66667	-0.991071
LTRL590_260011100.1	LtrL590_26:175,730..176,032(-)	100	303	10 kDa heat shock protein, putative	0.5	3	0.5	3	0.333333	4	3.33333	0	3	0	3	0	1	2.33333	0.666667	5	0.666667	5	0.666667	5	0	1	4	0	3	0.666667	5	0.666667	5	0.666667	5	0.666667	5	0.666667	5	0.666667	5	4.09524	0.5	3	-1	-1.66667	-1.7619	-0.666667	-1.27381
LTRL590_190012500.1	LtrL590_19:340,379..341,086(+)	235	708	SNARE protein, putative	1	2	1	2	1	2	2	0.333333	4	0.333333	4	0	4	4	1	2	1	2	1	2	1	2	2	0.333333	4	1	2	1	2	1	2	1	2	1	2	1	2	2.14286	0	1	2	2	1.85714	3	2.21429
LTRL590_180009500.1	LtrL590_18:182,183..182,596(-)	137	414	hypothetical protein, conserved	0	1	0	1	0	1	1	1	4	1	4	2	3	3.66667	1	2	1	2	1	2	1	2	2	1	4	1	2	1	2	1	2	1	2	1	2	1	2	2.14286	1	2	2.66667	1.66667	1.52381	1.66667	1.88095
LTRL590_180013200.1	LtrL590_18:336,759..337,478(+)	239	720	DNA-directed RNA polymerase II/III subunit, putative	#DIV/0!	0	#DIV/0!	0	#DIV/0!	0	0	0.5	3	0.5	3	1	2	2.66667	0	1	0	1	0	1	0	1	1	0.5	3	0	1	0	1	0	1	0	1	0	1	0	1	1.14286	0	1	2.66667	1.66667	1.52381	1.66667	1.88095
LTRL590_310025300.1	LtrL590_31:833,135..833,983(-)	282	849	hypothetical protein, conserved	#DIV/0!	0	#DIV/0!	1	#DIV/0!	2	1	1	4	1	4	0.5	3	3.66667	1	2	1	2	1	2	1	2	2	1	4	1	2	1	2	1	2	1	2	1	2	1	2	2.14286	1	2	2.66667	1.66667	1.52381	1.66667	1.88095
LTRL590_200008400.1	LtrL590_20:113,361..113,615(+)	84	255	hypothetical protein, conserved	#DIV/0!	0	#DIV/0!	0	#DIV/0!	0	0	0	3	0	3	0.5	3	3	0	1	0	1	0	1	0	1	1	0	3	0	1	0	1	0	1	0	1	0	1	0	1	1.14286	0	1	3	2	1.85714	2	2.21429
LTRL590_270029200.1	LtrL590_27:975,177..975,665(-)	162	489	Vitamin K epoxide reductase family, putative	0	1	0	1	0	1	1	1.5	5	1.5	5	1	2	4	0	2	0	2	0	2	0	2	2	1.5	5	0	2	0	2	0	2	0	2	0	2	0	2	2.14286	0	2	3	2	1.85714	2	2.21429
LTRL590_300013100.1	LtrL590_30:240,844..241,359(+)	171	516	hypothetical protein, conserved	#DIV/0!	0	#DIV/0!	0	#DIV/0!	0	0	0.5	3	0.5	3	0.5	3	3	0	1	0	1	0	1	0	1	1	0.5	3	0	1	0	1	0	1	0	1	0	1	0	1	1.14286	0	1	3	2	1.85714	2	2.21429
LTRL590_310026000.1	LtrL590_31:853,803..854,087(-)	94	285	Cullin protein neddylation domain containing protein, putative	#DIV/0!	0	#DIV/0!	0	#DIV/0!	0	0	0	3	0	3	0	3	3	0	1	0	1	0	1	0	1	1	0	3	0	1	0	1	0	1	0	1	0	1	0	1	1.14286	0	1	3	2	1.85714	2	2.21429
LTRL590_270030500.1	LtrL590_27:1,018,721..1,019,269(-)	182	549	MORN repeat, putative	#DIV/0!	0	#DIV/0!	0	#DIV/0!	0	0	0.5	3	0.5	3	0	1	2.33333	0	1	0	1	0	1	0	1	1	0.5	3	0	1	0	1	0	1	0	1	0	1	0	1	1.14286	0	1	2.33333	1.33333	1.19048	1.33333	1.54762
LTRL590_360062900.1	LtrL590_36:2,005,206..2,005,946(-)	246	741	40S ribosomal protein SA, putative	0	1	0	1	0	1	1	0	1	0	1	0	1	1	0	1	0	1	0	1	0	1	1	0	1	0	2	0	1	0	2	0	2	#DIV/0!	0	0	2	1.14286	#DIV/0!	0	0	0	-0.142857	1	0.214286
LTRL590_290012400.1	LtrL590_29:266,567..266,983(-)	138	417	hypothetical protein, conserved	0	3	0	3	0	3	3	1	2	1	2	0	1	1.66667	0.333333	4	0.333333	4	0.333333	4	0.333333	4	4	1	2	0.333333	4	0.333333	4	0.333333	4	0.333333	4	0.333333	4	0.333333	4	3.19048	0.333333	4	-1.33333	-2.33333	-1.52381	-2.33333	-1.88095
LTRL590_260017900.1	LtrL590_26:448,949..449,977(+)	342	1029	hypothetical protein, conserved	3	4	1.5	5	3	4	4.33333	0	1	0	1	3	4	2	1.5	5	1.5	5	1.5	5	1.5	5	5	0	1	1.5	5	1.5	5	1.5	5	1.5	5	1.5	5	1.5	5	3.92857	1.5	5	-2.33333	-3	-1.92857	-3	-2.56548
LTRL590_270015400.1	LtrL590_27:404,830..405,225(-)	131	396	hypothetical protein	0.5	6	0.25	5	0.25	5	5.33333	1	4	1	4	1	2	3.33333	0.5	6	0.5	6	0.5	6	0.5	6	6	1	4	0.5	6	0.5	6	0.5	6	0.5	6	0.5	6	0.5	6	4.92857	0.5	6	-2	-2.66667	-1.59524	-2.66667	-2.23214
LTRL590_110019700.1	LtrL590_11:532,602..532,853(+)	83	252	hypothetical protein	1	6	1.5	5	1.5	5	5.33333	1	4	1	4	1	2	3.33333	1	6	1	6	1	6	1.33333	7	6.25	1	4	1.33333	7	1.33333	7	1.33333	7	1.33333	7	1	6	1.33333	7	5.61905	1.5	5	-2	-2.91667	-2.28571	-1.66667	-2.21726
LTRL590_260010200.1	LtrL590_26:141,851..143,467(-)	538	1617	galactofuranosyltransferase lpg1-like protein	2	9	2.5	7	2.5	7	7.66667	0.833333	11	0.833333	11	1.25	9	10.3333	1.66667	8	1.66667	8	1.66667	8	1	2	6.5	0.833333	11	1.66667	8	1.66667	8	1.66667	8	1.66667	8	1.66667	8	1.66667	8	7.52381	1.33333	7	2.66667	3.83333	2.80952	3.33333	3.16071
LTRL590_270013700.1	LtrL590_27:322,583..322,912(+)	109	330	glutaredoxin-like protein	0.5	3	0.333333	4	0.333333	4	3.66667	0	1	0	1	2	3	1.66667	0.5	3	0.5	3	0.5	3	0.5	3	3	0	1	0.5	3	0.5	3	0.5	3	0.5	3	0.5	3	0.5	3	2.35714	0.5	3	-2	-1.33333	-0.690476	-1.33333	-1.33929
LTRL590_350013400.1	LtrL590_35:303,236..305,068(+)	610	1833	Protein of unknown function (DUF2838), putative	1	6	1.5	5	2	6	5.66667	3	4	3	4	0.666667	5	4.33333	1.5	5	1.5	5	1.5	5	1.5	5	5	3	4	1.5	5	1.5	5	1.5	5	1.5	5	1.5	5	1.5	5	4.35714	1.5	5	-1.33333	-0.666667	-0.0238095	-0.666667	-0.672619
LTRL590_220017800.1	LtrL590_22:509,471..510,661(-)	396	1191	palmitoyl acyltransferase 11, putative	1.5	5	1.5	5	2.5	7	5.66667	1	4	1	4	2.5	7	5	1.5	5	1.5	5	1.5	5	1.5	5	5	1	4	1.5	5	1.5	5	1.5	5	1.5	5	1.5	5	1.5	5	4.35714	1.5	5	-0.666667	0	0.642857	0	-0.00595238
LTRL590_350023400.1	LtrL590_35:652,525..653,970(+)	481	1446	trypanin-like protein	0.5	6	0.5	6	0.5	6	6	1	4	1	4	0	4	4	0.5	6	0.5	6	0.5	6	0.5	6	6	1	4	0.5	6	0.5	6	0.5	6	0.5	6	0.5	6	0.5	6	4.92857	0.5	6	-2	-2	-0.928571	-2	-1.73214
LTRL590_350023900.1	LtrL590_35:667,545..669,680(+)	711	2136	protein kinase-like protein	3.5	9	3.5	9	3.5	9	9	0.75	7	0.75	7	0.6	8	7.33333	3.5	9	3.5	9	3.5	9	3.5	9	9	0.75	7	3.5	9	3.5	9	3.5	9	3.5	9	3.5	9	3.5	9	7.92857	3.5	9	-1.66667	-1.66667	-0.595238	-1.66667	-1.39881
LTRL590_240020100.1	LtrL590_24:508,997..509,599(+)	200	603	hypothetical protein, conserved	0.5	6	0.5	6	0.5	6	6	1	4	1	4	2.5	7	5	0.5	6	0.5	6	0.5	6	0.5	6	6	1	4	0.5	6	0.5	6	0.5	6	0.5	6	0.5	6	0.5	6	4.92857	0.5	6	-1	-1	0.0714286	-1	-0.732143
LTRL590_280032600.1	LtrL590_28:1,008,338..1,009,387(+)	349	1050	eukaryotic translation initiation factor 4e, putative	0.333333	4	0	3	0	3	3.33333	0	1	0	1	#DIV/0!	0	0.666667	0	3	0	3	0	3	#DIV/0!	0	2.25	0	1	0	3	0	3	0	3	0	3	0	3	0	3	2.28571	0	3	-2.66667	-1.58333	-1.61905	-2.33333	-2.0506
LTRL590_280010200.1	LtrL590_28:184,493..185,398(-)	301	906	protein kinase, putative	0	5	0	5	0	5	5	0.333333	4	0.333333	4	0	4	4	0	5	0	5	0	5	#DIV/0!	1	4	0.333333	4	0	5	0	5	0	5	0	5	0	5	0	5	4.14286	0	5	-1	0	-0.142857	-1	-0.535714
LTRL590_280019000.1	LtrL590_28:490,024..491,382(+)	452	1359	phenylalanine-4-hydroxylase	0.333333	4	0.333333	4	0.333333	4	4	0.5	6	0.5	6	2	3	5	0.333333	4	0.333333	4	0.333333	4	#DIV/0!	0	3	0.5	6	0.666667	5	0.666667	5	0.333333	4	0.333333	4	0.333333	4	0.666667	5	4.19048	0.333333	4	1	2	0.809524	1	1.20238
LTRL590_320039800.1	LtrL590_32:1,255,463..1,255,768(+)	101	306	hypothetical protein, conserved	#DIV/0!	0	#DIV/0!	0	#DIV/0!	0	0	0	1	0	1	0	2	1.33333	0	1	0	1	0	1	0	1	1	0	1	0	1	0	1	0	1	0	1	0	1	0	1	0.857143	#DIV/0!	0	1.33333	0.333333	0.47619	1.33333	0.869048
LTRL590_320017300.1	LtrL590_32:433,263..433,829(+)	188	567	hypothetical protein, conserved	#DIV/0!	1	#DIV/0!	1	#DIV/0!	1	1	0	2	0	2	0	1	1.66667	1	2	1	2	1	2	1	2	2	0	2	1	2	1	2	1	2	1	2	1	2	1	2	1.85714	#DIV/0!	1	0.666667	-0.333333	-0.190476	0.666667	0.202381
LTRL590_320037700.1	LtrL590_32:1,188,000..1,188,569(-)	189	570	ATP binding protein-like protein	0	1	0	1	0	1	1	0	2	0	2	0	1	1.66667	1	2	1	2	1	2	1	2	2	0	2	1	2	1	2	1	2	1	2	1	2	1	2	1.85714	0	1	0.666667	-0.333333	-0.190476	0.666667	0.202381
LTRL590_320007400.1	LtrL590_32:75,637..75,912(-)	91	276	dynein light chain, flagellar outer arm, putative	#DIV/0!	0	#DIV/0!	0	#DIV/0!	0	0	0	1	0	1	0	1	1	0	1	0	1	0	1	0	1	1	0	1	0	1	0	1	0	1	0	1	0	1	0	1	0.857143	#DIV/0!	0	1	0	0.142857	1	0.535714
LTRL590_320028500.1	LtrL590_32:845,313..845,714(-)	133	402	hypothetical protein, conserved	#DIV/0!	0	#DIV/0!	0	#DIV/0!	0	0	0	1	0	1	0	1	1	0	1	0	1	0	1	0	1	1	0	1	0	1	0	1	0	1	0	1	0	1	0	1	0.857143	#DIV/0!	0	1	0	0.142857	1	0.535714
LTRL590_320038000.1	LtrL590_32:1,200,272..1,200,487(+)	71	216	Cytochrome oxidase c subunit VIb, putative	#DIV/0!	0	#DIV/0!	0	#DIV/0!	0	0	0	1	0	1	0	1	1	0	1	0	1	0	1	0	1	1	0	1	0	1	0	1	0	1	0	1	0	1	0	1	0.857143	#DIV/0!	0	1	0	0.142857	1	0.535714
LTRL590_130017500.1	LtrL590_13:439,179..439,769(-)	196	591	Complex 1 protein (LYR family), putative	0	4	0	4	0	4	4	1	2	1	2	1	2	2	0	4	0	4	0	4	0	4	4	1	2	0	4	0	4	0	4	0	4	0	4	0	4	3.14286	0	3	-2	-2	-1.14286	-1	-1.53571
LTRL590_280014400.1	LtrL590_28:323,460..323,990(+)	176	531	hypothetical protein, conserved	0	4	0	4	0	4	4	1	2	1	2	1	2	2	0	4	0	4	0	4	#DIV/0!	0	3	1	2	0	4	0	4	0	4	0	4	0	4	0	4	3.14286	0	4	-2	-1	-1.14286	-2	-1.53571
LTRL590_240022900.1	LtrL590_24:628,146..628,505(+)	119	360	ring-box protein, putative	0	3	0	3	0	3	3	0	2	0	2	0	2	2	0	4	0	4	0	4	0	4	4	0	2	0	4	0	4	0	4	0	4	0	4	0	4	3.14286	0	4	-1	-2	-1.14286	-2	-1.53571
LTRL590_300012300.1	LtrL590_30:219,689..220,882(-)	397	1194	hypothetical protein, conserved	0	3	0	3	0	3	3	0	2	0	2	0	2	2	0	4	0	4	0	4	0	4	4	0	2	0	4	0	4	0	4	0	4	0	4	0	4	3.14286	0	4	-1	-2	-1.14286	-2	-1.53571
LTRL590_340012200.1	LtrL590_34:284,740..285,669(+)	309	930	proteasome regulatory non-ATPase subunit 11, putative	0	1	0	1	0	1	1	0	3	0	3	0	3	3	0	2	0	2	0	2	0	2	2	0	3	0	2	0	2	0	2	0	2	0	2	0	2	1.85714	0	1	2	1	1.14286	2	1.53571
LTRL590_260031500.1	LtrL590_26:1,004,818..1,006,119(+)	433	1302	protein kinase, putative	3	4	2	6	1.5	5	5	1	10	1	10	1	6	8.66667	1	6	1	6	1	6	1	6	6	1	10	1	6	1	6	1.33333	7	1.33333	7	1.33333	7	1	6	6.19048	1	6	3.66667	2.66667	2.47619	2.66667	2.86905
LTRL590_360007000.1	LtrL590_36:44,492..44,959(-)	155	468	hypothetical protein, conserved	#DIV/0!	1	#DIV/0!	1	#DIV/0!	1	1	0	3	0	3	0	4	3.33333	1	2	1	2	1	2	1	2	2	0	3	1	2	1	2	1	2	1	2	#DIV/0!	1	1	2	1.85714	#DIV/0!	1	2.33333	1.33333	1.47619	2.33333	1.86905
LTRL590_230026700.1	LtrL590_23:766,219..766,407(+)	62	189	hypothetical protein	1	2	2	3	3	4	3	#DIV/0!	0	#DIV/0!	0	#DIV/0!	0	0	2	3	2	3	2	3	2	3	3	#DIV/0!	0	2	3	2	3	2	3	2	3	0	1	2	3	2.14286	1	2	-3	-3	-2.14286	-2	-2.53571
LTRL590_310042600.1	LtrL590_31:1,503,836..1,504,696(-)	286	861	aldehyde reductase, putative	1	2	2	3	3	4	3	0.5	6	0.5	6	1	6	6	1	4	1	4	1	4	1	4	4	0.5	6	1	4	1	4	1	4	1	4	1	4	1	4	3.85714	0.5	3	3	2	2.14286	3	2.53571
LTRL590_150005400.1	LtrL590_15:10,227..11,126(-)	299	900	cytochrome-b5 reductase, putative	0	2	0	2	0	2	2	1	6	1	6	0	2	4.66667	0	3	0	3	0	3	0.333333	4	3.25	1	6	0	3	0	1	0	3	0	3	0	3	0	3	2.71429	0	3	2.66667	1.41667	1.95238	1.66667	1.9256
LTRL590_350029300.1	LtrL590_35:898,015..898,473(+)	152	459	Spt4/RpoE2 zinc finger containing protein, putative	1	2	1	2	1	2	2	#DIV/0!	1	#DIV/0!	1	#DIV/0!	0	0.666667	1	2	1	2	1	2	2	3	2.25	#DIV/0!	1	1	2	1	2	1	2	1	2	1	2	1	2	1.71429	#DIV/0!	1	-1.33333	-1.58333	-1.04762	-0.333333	-1.0744
LTRL590_320016500.1	LtrL590_32:411,551..413,167(+)	538	1617	chaperonin containing t-complex protein, putative	0	4	0	4	0.2	6	4.66667	0	5	0	5	0	3	4.33333	0.2	6	0	5	0	5	0	5	5.25	0	5	0	5	0	5	0	5	0	5	0	5	0	5	4.28571	0	4	-0.333333	-0.916667	0.047619	0.333333	-0.217262
LTRL590_260011300.1	LtrL590_26:182,940..184,073(-)	377	1134	protein disulfide isomerase, putative	0.166667	7	0.25	5	0.5	6	6	0.5	6	0.5	6	0.25	5	5.66667	0.2	6	0.2	6	0.2	6	0	1	4.75	0.5	6	0.2	6	0.2	6	0.2	6	0.2	6	0.2	6	0.2	6	5.17143	0.25	5	-0.333333	0.916667	0.495238	0.666667	0.43631
LTRL590_280036600.1	LtrL590_28:1,151,899..1,153,257(-)	452	1359	glutamate dehydrogenase, putative	0.4	7	0.4	7	0.4	7	7	0.5	6	0.5	6	0.75	7	6.33333	0.6	8	0.6	8	0.6	8	#DIV/0!	0	6	0.5	6	0.25	5	0.6	8	0.6	8	0.6	8	0.6	8	0.25	5	5.8	1	6	-0.666667	0.333333	0.533333	0.333333	0.133333
LTRL590_360075900.1	LtrL590_36:2,485,587..2,486,420(-)	277	834	hypothetical protein, conserved	0	1	0	1	0	1	1	0.666667	5	0.666667	5	0	1	3.66667	0	1	0	1	0	1	0	2	1.25	0.666667	5	0	2	0	2	0	2	0	2	0	2	0	2	2.14286	0	1	2.66667	2.41667	1.52381	2.66667	2.31845
LTRL590_280032300.1	LtrL590_28:1,001,689..1,002,567(+)	292	879	MRP protein-like protein	0	6	0	7	0	5	6	0.5	6	0.5	6	0.25	5	5.66667	0	6	0	6	0	6	0	1	4.75	0.5	6	0	6	0	6	0	6	0	6	0	6	0	6	5.14286	0	5	-0.333333	0.916667	0.52381	0.666667	0.443452
LTRL590_180022400.1	LtrL590_18:753,547..753,750(+)	67	204	hypothetical protein, conserved	#DIV/0!	0	#DIV/0!	0	#DIV/0!	0	0	2	3	0	1	#DIV/0!	0	1.33333	#DIV/0!	0	#DIV/0!	0	#DIV/0!	0	#DIV/0!	1	0.25	0	1	#DIV/0!	0	#DIV/0!	0	2	3	3	4	#DIV/0!	0	#DIV/0!	1	1.14286	#DIV/0!	0	1.33333	1.08333	0.190476	1.33333	0.985119
LTRL590_320029900.1	LtrL590_32:909,572..910,135(-)	187	564	heat shock protein Hsp20, putative	0	2	0	1	0	1	1.33333	0.25	5	0.25	5	0.2	6	5.33333	0	2	0	2	0	2	0	2	2	0.25	5	0	2	0	2	0	2	0	2	0	2	0	2	2.14286	0	1	4	3.33333	3.19048	4.33333	3.71429
LTRL590_320006700.1	LtrL590_32:57,466..57,741(-)	91	276	hypothetical protein, conserved	#DIV/0!	0	0	1	#DIV/0!	0	0.333333	0.5	3	0.5	3	0	1	2.33333	0	1	0	1	0	1	0	1	1	0.5	3	0	1	0	1	0	1	0	1	0	1	0	1	1.14286	#DIV/0!	0	2	1.33333	1.19048	2.33333	1.71429
LTRL590_350016900.1	LtrL590_35:438,840..440,663(+)	607	1824	Rhodanese-like domain containing protein, putative	2	9	2	9	2	9	9	0.8	9	0.8	9	0.75	7	8.33333	1.5	10	1.5	10	1.5	10	1.5	10	10	0.8	9	1.5	10	1.2	11	1.5	10	1.5	10	1.5	10	1.5	10	8.78571	1.25	9	-0.666667	-1.66667	-0.452381	-0.666667	-0.863095
LTRL590_050005900.1	LtrL590_05:27,198..29,111(+)	637	1914	phosphoprotein phosphatase, putative	0.166667	7	0	4	0	7	6	0	6	0	6	0	4	5.33333	0.4	7	0.4	7	0.4	7	0	4	6.25	0	6	0.4	7	0.4	7	0.4	7	0.4	7	0.4	7	0.4	7	5.91429	0.25	5	-0.666667	-0.916667	-0.580952	0.333333	-0.457738
LTRL590_140009400.1	LtrL590_14:136,143..136,658(+)	171	516	hypothetical protein	0	3	0	1	2	3	2.33333	#DIV/0!	0	#DIV/0!	0	#DIV/0!	1	0.333333	1	2	1	2	0	1	0	1	1.5	#DIV/0!	0	0	1	0	1	0	1	2.5	7	0	1	0	1	1.57143	#DIV/0!	1	-2	-1.16667	-1.2381	-0.666667	-1.26786
LTRL590_350023600.1	LtrL590_35:658,076..660,295(+)	739	2220	hypothetical protein, conserved	0.25	5	0.25	5	0.25	5	5	0.2	6	0.2	6	0.4	7	6.33333	0.333333	4	0.333333	4	0.333333	4	0.333333	4	4	0.2	6	0.333333	4	0.333333	4	0.333333	4	0.333333	4	0.333333	4	0.333333	4	3.7619	0.333333	4	1.33333	2.33333	2.57143	2.33333	2.14286
LTRL590_250021900.1	LtrL590_25:597,891..600,008(-)	705	2118	calpain family cysteine protease-like protein	1	2	1	2	1	2	2	1	6	1	6	4	5	5.66667	2	3	2	3	#DIV/0!	2	2	3	2.75	1	6	2	3	2	3	2	3	2	3	2	3	2	3	3.28571	2	3	3.66667	2.91667	2.38095	2.66667	2.90774
LTRL590_280011500.1	LtrL590_28:244,163..244,822(-)	219	660	ER lumen retaining receptor-like protein	0	1	0	1	0	1	1	2	6	2	6	0	2	4.66667	0	2	0	2	0	2	0	1	1.75	2	6	0	2	0	2	0	2	0	2	0	2	0	2	2.28571	0	2	3.66667	2.91667	2.38095	2.66667	2.90774
LTRL590_220013100.1	LtrL590_22:308,506..309,582(+)	358	1077	protein kinase, putative	0	2	0	3	0.5	3	2.66667	0.333333	4	0.333333	4	0.333333	4	4	#DIV/0!	1	#DIV/0!	1	#DIV/0!	1	0.333333	4	1.75	0.333333	4	0.5	3	0.5	3	0.5	3	0.5	3	0.5	3	0.5	3	2.78571	0.5	3	1.33333	2.25	1.21429	1	1.4494
LTRL590_130008800.1	LtrL590_13:130,051..131,589(+)	512	1539	Histidine phosphatase superfamily (branch 1), putative	1.66667	8	2.5	7	2.5	7	7.33333	1	4	1	4	0	2	3.33333	3	8	3	8	3	8	3	8	8	1	4	3	8	3	8	3	8	3	8	3	8	3	8	6.71429	2.5	7	-4	-4.66667	-3.38095	-3.66667	-3.92857
LTRL590_320013100.1	LtrL590_32:267,001..268,170(+)	389	1170	hypothetical protein, conserved	1	4	0.5	3	1	4	3.66667	1	8	1	8	1.2	11	9	1	4	1	4	1	4	1	4	4	1	8	1	4	1.5	5	1	4	1	4	1	4	1	4	4.28571	0.5	3	5.33333	5	4.71429	6	5.2619
LTRL590_130022100.1	LtrL590_13:647,884..649,707(+)	607	1824	Protein Associated with Differentiation, putative	0.625	13	1	14	0.857143	13	13.3333	0.8	18	0.7	17	0.285714	9	14.6667	1	14	1	14	1	14	1	14	14	0.7	17	1	14	1.14286	15	1	14	1	14	1	14	1	14	12.7143	0.857143	13	1.33333	0.666667	1.95238	1.66667	1.40476
LTRL590_260011400.1	LtrL590_26:185,070..185,573(-)	167	504	Thioredoxin, putative	1	4	1	4	1	4	4	3	8	3	8	3.5	9	8.33333	1.5	5	1.5	5	1.5	5	#DIV/0!	1	4	3	8	1.5	5	1.5	5	1.5	5	1.5	5	1.5	5	1.5	5	4.92857	1.5	5	4.33333	4.33333	3.40476	3.33333	3.85119
LTRL590_320043500.1	LtrL590_32:1,424,505..1,424,729(+)	74	225	hypothetical protein	0	2	0	2	0	2	2	0.25	5	0.25	5	0.5	3	4.33333	0.5	3	0.5	3	0.5	3	0.5	3	3	0.25	5	0.5	3	0.5	3	0.5	3	0.5	3	0.5	3	0.5	3	2.92857	0	2	2.33333	1.33333	1.40476	2.33333	1.85119
LTRL590_060015000.1	LtrL590_06:409,409..410,080(+)	223	672	cell cycle associated protein MOB1, putative	#DIV/0!	0	#DIV/0!	0	#DIV/0!	0	0	0.5	3	0.5	3	0	2	2.66667	#DIV/0!	0	#DIV/0!	0	#DIV/0!	0	0	1	0.25	0.5	3	0	1	0	1	0	1	0	1	0	1	0	1	1.14286	0	1	2.66667	2.41667	1.52381	1.66667	2.06845
LTRL590_210010200.1	LtrL590_21:148,754..151,801(+)	1015	3048	vacuolar sorting-associated-like protein	0.4	7	0.75	7	0.4	7	7	0.166667	7	0.166667	7	0.5	6	6.66667	0.4	7	0.4	7	0.4	7	0.4	7	7	0.166667	7	0.4	7	0.4	7	0.4	7	0.4	7	0.4	7	0.4	7	6.05714	0.5	6	-0.333333	-0.333333	0.609524	0.666667	0.152381
LTRL590_270008500.1	LtrL590_27:93,780..95,267(+)	495	1488	RNA recognition motif (a.k.a. RRM, RBD, or RNP domain), putative	0.25	5	0.5	6	0.25	5	5.33333	0	4	0	4	0.5	6	4.66667	0.2	6	0	1	0.2	6	0.2	6	4.75	0	4	0.2	6	0.2	6	0.2	6	0.2	6	0.2	6	0.2	6	4.88571	0.2	6	-0.666667	-0.0833333	-0.219048	-1.33333	-0.575595
LTRL590_350023000.1	LtrL590_35:645,119..645,859(+)	246	741	Proteasome complex subunit Rpn13 ubiquitin receptor, putative	0.2	6	0.166667	7	0.2	6	6.33333	0	5	0	5	0	1	3.66667	0.2	6	0.2	6	0.2	6	0.2	6	6	0	5	0.2	6	0.2	6	0.2	6	0.2	6	0.2	6	0.2	6	5.02857	0.2	6	-2.66667	-2.33333	-1.3619	-2.33333	-2.17381
LTRL590_340025800.1	LtrL590_34:808,150..809,451(-)	433	1302	Thioredoxin, putative	#DIV/0!	3	#DIV/0!	2	#DIV/0!	2	2.33333	1	6	1	6	1	6	6	#DIV/0!	2	#DIV/0!	2	#DIV/0!	2	2	3	2.25	1	6	2	3	2	3	2	3	2	3	2	3	2	3	3.28571	#DIV/0!	2	3.66667	3.75	2.71429	4	3.53274
LTRL590_320036700.1	LtrL590_32:1,159,783..1,161,117(-)	444	1335	hypothetical protein, conserved	0	3	0	1	0	2	2	2	6	2	6	0.666667	5	5.66667	0	2	0	2	0	2	0	2	2	2	6	0	2	0	2	0	2	0	2	0	2	0	2	2.28571	0	1	3.66667	3.66667	3.38095	4.66667	3.84524
LTRL590_360030300.1	LtrL590_36:912,246..913,352(+)	368	1107	developmentally regulated GTP-binding protein 1, putative	0	1	0	1	0	1	1	0	6	0	6	0	2	4.66667	0	2	0	2	0	2	0	2	2	0	6	0	2	0	2	0	2	0	2	0	2	0	2	2.28571	0	2	3.66667	2.66667	2.38095	2.66667	2.84524
LTRL590_170018900.1	LtrL590_17:618,782..619,507(+)	241	726	hypothetical protein, conserved	#DIV/0!	0	#DIV/0!	0	#DIV/0!	0	0	0.333333	4	0.333333	4	1	4	4	0	1	0	1	0	1	0	1	1	0.333333	4	0	1	0	1	0	1	0	1	0	1	0	1	1.28571	0	1	4	3	2.71429	3	3.17857
LTRL590_220021000.1	LtrL590_22:633,956..634,972(+)	338	1017	CCR4 associated factor, putative	0	3	0	3	0	5	3.66667	0	1	0	1	#DIV/0!	0	0.666667	0	3	0	3	0	3	0	3	3	0	1	0	3	0	3	0	3	0	3	0	3	0	3	2.28571	0	3	-3	-2.33333	-1.61905	-2.33333	-2.32143
LTRL590_360036900.1	LtrL590_36:1,150,676..1,152,157(-)	493	1482	hypothetical protein, conserved	4	5	4	5	4	5	5	3.5	9	3.5	9	4	5	7.66667	5	6	5	6	5	6	5	6	6	3.5	9	5	6	5	6	5	6	5	6	5	6	5	6	6.28571	5	6	2.66667	1.66667	1.38095	1.66667	1.84524
LTRL590_320047800.1	LtrL590_32:1,553,624..1,554,181(+)	185	558	hypothetical protein, conserved	1	6	1.33333	7	1.33333	7	6.66667	0.5	6	0.5	6	1	2	4.66667	1	6	1	6	1	6	1	6	6	0.5	6	1	6	1	6	1	6	1	6	1	6	1	6	5.28571	1	6	-2	-1.33333	-0.619048	-1.33333	-1.32143
LTRL590_350023500.1	LtrL590_35:655,369..656,190(+)	273	822	Eukaryotic rRNA processing protein EBP2, putative	1	4	1.5	5	1.5	5	4.66667	0	2	0	2	0	1	1.66667	1	4	1	4	1	4	1	4	4	0	2	1	4	1	4	1	4	1	4	1	4	1	4	3.28571	1	4	-3	-2.33333	-1.61905	-2.33333	-2.32143
LTRL590_360046500.1	LtrL590_36:1,427,132..1,427,728(-)	198	597	hypothetical protein, conserved	0.333333	4	0.333333	4	0.333333	4	4	#DIV/0!	1	#DIV/0!	1	0	1	1	0.333333	4	0.333333	4	0.333333	4	0.333333	4	4	#DIV/0!	1	0.333333	4	0.333333	4	0.333333	4	0.333333	4	0.333333	4	0.333333	4	3.04762	0	3	-3	-3	-2.04762	-2	-2.5119
LTRL590_310041900.1	LtrL590_31:1,482,209..1,482,745(-)	178	537	ADP-ribosylation factor, putative	#DIV/0!	0	#DIV/0!	0	#DIV/0!	0	0	0	4	0	4	0	2	3.33333	0	1	0	1	0	1	0	1	1	0	4	0	1	0	1	0	1	0	1	0	1	0	1	1.28571	0	1	3.33333	2.33333	2.04762	2.33333	2.5119
LTRL590_280036500.1	LtrL590_28:1,146,754..1,148,355(-)	533	1602	oligomeric golgi complex component 8, putative	0.4	7	0.2	6	0.2	6	6.33333	0	6	0	6	0	4	5.33333	0.166667	7	0.166667	7	0.166667	7	0	1	5.5	0	6	0.166667	7	0.166667	7	0.166667	7	0.166667	7	0.166667	7	0.166667	7	5.88095	0	5	-1	-0.166667	-0.547619	0.333333	-0.345238
LTRL590_230022500.1	LtrL590_23:622,070..622,978(+)	302	909	lathosterol oxidase-like protein	2	3	1	4	1	4	3.66667	0.333333	4	0.333333	4	0.666667	5	4.33333	0.666667	5	0.666667	5	0.666667	5	0.666667	5	5	0.333333	4	0.666667	5	0.666667	5	0.666667	5	0.666667	5	0.666667	5	0.666667	5	4.2381	1	4	0.666667	-0.666667	0.0952381	0.333333	0.107143
LTRL590_260030300.1	LtrL590_26:966,804..967,493(+)	229	690	CDP-diacylglycerol--inositol 3-phosphatidyltransferase, putative	0.333333	4	0.333333	4	0.333333	4	4	0	3	0	3	0.5	3	3	0.25	5	0.25	5	0.25	5	0.25	5	5	0	3	0.25	5	0.25	5	0.25	5	0.25	5	0.25	5	0.25	5	4.03571	0.25	5	-1	-2	-1.03571	-2	-1.50893
LTRL590_350053300.1	LtrL590_35:1,749,149..1,749,493(+)	114	345	hypothetical protein, conserved	0	1	0	2	0	1	1.33333	#DIV/0!	0	#DIV/0!	0	#DIV/0!	0	0	0	1	0	1	0	1	0	1	1	#DIV/0!	0	0	1	0	1	0	1	0	1	0	1	0	1	0.714286	#DIV/0!	0	-1.33333	-1	-0.714286	0	-0.761905
LTRL590_040008500.1	LtrL590_04:112,959..114,020(+)	353	1062	Phytanoyl-CoA dioxygenase (PhyH), putative	0	2	0	4	0	2	2.66667	0	3	0	3	0.5	3	3	0	4	0	4	0	4	0	4	4	0	3	0	4	0	4	0	4	0	4	0	4	0	4	3.28571	0	3	0.333333	-1	-0.285714	0	-0.238095
LTRL590_210025700.1	LtrL590_21:723,462..724,355(-)	297	894	mitochondrial structure specific endonuclease I (SSE-1), putative	2	6	2	6	2.5	7	6.33333	0.6	8	0.6	8	0.75	7	7.66667	2	6	2	6	2	6	2	6	6	0.6	8	2	6	2	6	2	6	2	6	2	6	2	6	5.71429	4	5	1.33333	1.66667	1.95238	2.66667	1.90476
LTRL590_340005000.1	LtrL590_34:5,655..6,575(-)	306	921	short chain dehydrogenase, putative	0	2	0.5	3	0	2	2.33333	2	3	2	3	1.33333	7	4.33333	0	2	0	2	0	2	0	2	2	2	3	0	2	0	2	0	2	0	2	0	2	0	2	1.85714	0	1	2	2.33333	2.47619	3.33333	2.53571
LTRL590_320017600.1	LtrL590_32:446,858..447,955(+)	365	1098	mitochondrial carrier protein-like protein	6	7	5	6	5	6	6.33333	2	6	2	6	1.5	5	5.66667	5	6	5	6	5	6	5	6	6	2	6	5	6	5	6	5	6	5	6	5	6	5	6	5.85714	4	5	-0.666667	-0.333333	-0.190476	0.666667	-0.130952
LTRL590_360042500.1	LtrL590_36:1,312,485..1,312,874(-)	129	390	60S ribosomal protein L22, putative	#DIV/0!	0	#DIV/0!	0	#DIV/0!	0	0	0.333333	4	0.333333	4	1	2	3.33333	0	1	0	1	#DIV/0!	0	0	1	0.75	0.333333	4	0	1	0	1	0	1	0	1	#DIV/0!	0	0	1	1.14286	#DIV/0!	0	3.33333	2.58333	2.19048	3.33333	2.86012
LTRL590_280005200.1	LtrL590_28:6,244..7,539(+)	431	1296	cell division cycle 6 (CDC6), putative	0.5	9	0.5	12	0.428571	10	10.3333	0.75	7	0.75	7	0.166667	7	7	0.5	12	0.5	12	0.5	12	#DIV/0!	0	9	0.75	7	0.5	12	0.5	12	0.5	12	0.5	12	0.5	12	0.5	12	9.64286	0.666667	10	-3.33333	-2	-2.64286	-3	-2.74405
LTRL590_350014500.1	LtrL590_35:333,681..334,430(+)	249	750	hypothetical protein, conserved	1	6	1	6	1	6	6	0.5	3	0.5	3	0	2	2.66667	1	6	1	6	1	6	1	6	6	0.5	3	1	6	1	6	1	6	1	6	1	6	1	6	4.85714	1	6	-3.33333	-3.33333	-2.19048	-3.33333	-3.04762
LTRL590_210014000.1	LtrL590_21:253,018..253,872(+)	284	855	ras-related protein Rab21, putative	2	3	3	4	2	3	3.33333	0	1	0	1	0	1	1	2	3	2	3	2	3	2	3	3	0	1	2	3	2	3	2	3	2	3	2	3	2	3	2.57143	#DIV/0!	2	-2.33333	-2	-1.57143	-1	-1.72619
LTRL590_130017700.1	LtrL590_13:447,933..449,330(-)	465	1398	hypothetical protein, conserved	5	6	4	5	4	5	5.33333	2	3	2	3	1	4	3.33333	4	5	4	5	4	5	4	5	5	2	3	4	5	4	5	4	5	4	5	4	5	4	5	4.57143	3	4	-2	-1.66667	-1.2381	-0.666667	-1.39286
LTRL590_100013400.1	LtrL590_10:279,738..280,409(-)	223	672	small GTP-binding protein Rab7, putative	#DIV/0!	1	1	2	#DIV/0!	1	1.33333	1	2	1	2	1	2	2	1	2	1	2	1	2	2	3	2.25	1	2	2	3	2	3	2	3	2	3	2	3	2	3	2.71429	1	2	0.666667	-0.25	-0.714286	0	-0.0744048
LTRL590_280010600.1	LtrL590_28:199,591..199,815(-)	74	225	hypothetical protein	1	4	1	4	1	4	4	#DIV/0!	0	#DIV/0!	0	#DIV/0!	0	0	1	4	1	4	1	4	#DIV/0!	0	3	#DIV/0!	0	1	4	1	4	1	4	1	4	1	4	1	4	3	1	4	-4	-3	-3	-4	-3.5
LTRL590_060006400.1	LtrL590_06:56,874..58,238(-)	454	1365	HD domain containing protein, putative	0.333333	4	0.5	3	0.5	3	3.33333	0.333333	4	0.333333	4	1	2	3.33333	2	3	2	3	2	3	2	3	3	0.333333	4	2	3	2	3	2	3	2	3	2	3	2	3	3	1	2	0	0.333333	0.333333	1.33333	0.5
LTRL590_250030500.1	LtrL590_25:857,467..858,357(+)	296	891	Pex2 / Pex12 amino terminal region/Zinc finger, C3HC4 type (RING finger) containing protein, putative	0	4	0	4	0	4	4	0	5	0	5	0	5	5	0	6	0	6	0	2	0	6	5	0	5	0	6	0	6	0	6	0	6	0	6	0	6	5	0	4	1	0	0	1	0.5
LTRL590_020012600.1	LtrL590_02:335,954..336,901(+)	315	948	hypothetical protein, conserved	1	2	1	2	1	2	2	3	4	3	4	#DIV/0!	2	3.33333	2	3	2	3	2	3	2	3	3	3	4	2	3	2	3	2	3	2	3	2	3	2	3	3	1	2	1.33333	0.333333	0.333333	1.33333	0.833333
LTRL590_360023000.1	LtrL590_36:653,121..653,528(-)	135	408	poly-zinc finger protein 2, putative	0	1	0	1	0	1	1	0.5	3	0.5	3	1	2	2.66667	1	2	1	2	1	2	1	2	2	0.5	3	1	2	1	2	1	2	1	2	1	2	1	2	2	#DIV/0!	1	1.66667	0.666667	0.666667	1.66667	1.16667
LTRL590_270016000.1	LtrL590_27:446,168..446,788(-)	206	621	hypothetical protein, conserved	0	1	0	1	0	1	1	0.5	3	0.5	3	0.5	3	3	1	2	1	2	1	2	1	2	2	0.5	3	1	2	1	2	1	2	1	2	1	2	1	2	2	#DIV/0!	1	2	1	1	2	1.5
LTRL590_040007700.1	LtrL590_04:87,633..88,976(+)	447	1344	Alcohol dehydrogenase GroES-like domain containing protein, putative	0	1	0	1	0	1	1	0	4	0	4	0	2	3.33333	0	2	0	2	0	2	0	2	2	0	4	0	2	0	2	0	2	0	2	0	2	0	2	2	0	1	2.33333	1.33333	1.33333	2.33333	1.83333
LTRL590_060009300.1	LtrL590_06:143,239..143,808(+)	189	570	hypothetical protein, conserved	1	2	1	2	1	2	2	1	4	1	4	0.4	7	5	2	3	2	3	2	3	2	3	3	1	4	2	3	2	3	2	3	2	3	2	3	2	3	3	1	2	3	2	2	3	2.5
LTRL590_030015000.1	LtrL590_03:378,924..379,910(-)	328	987	hypothetical protein, conserved	1	6	1	6	1	6	6	0.333333	4	0.333333	4	0	2	3.33333	1	6	1	6	1	6	1	6	6	0.333333	4	1	6	1	6	1	6	1	6	1	6	1	6	5	0.666667	5	-2.66667	-2.66667	-1.66667	-1.66667	-2.16667
LTRL590_270005400.1	LtrL590_27:10,456..11,466(-)	336	1011	Queuine tRNA-ribosyltransferase, putative	2	3	1	4	0.5	6	4.33333	0.75	7	0.75	7	1	2	5.33333	0.5	6	0.666667	5	0.5	6	0	1	4.5	0.75	7	0.5	6	0.5	6	0.5	6	0.5	6	0.5	6	0.5	6	5.35714	1	4	1	0.833333	-0.0238095	1.33333	0.785714
LTRL590_340028600.1	LtrL590_34:899,662..900,228(-)	188	567	hypothetical protein, conserved	0	1	1	2	0	1	1.33333	0	1	0	1	0	2	1.33333	0	1	0	1	0	1	0.5	3	1.5	0	1	0.5	3	0.5	3	0.5	3	0.5	3	0.5	3	0.5	3	2.35714	0	1	0	-0.166667	-1.02381	0.333333	-0.214286
LTRL590_340018300.1	LtrL590_34:508,251..508,865(-)	204	615	Uncharacterised ACR, YggU family COG1872, putative	#DIV/0!	3	#DIV/0!	3	3	4	3.33333	1	4	1	4	0.142857	8	5.33333	#DIV/0!	3	#DIV/0!	3	#DIV/0!	3	1.5	5	3.5	1	4	1.5	5	1.5	5	1.5	5	1.5	5	1.5	5	1.5	5	4.35714	#DIV/0!	3	2	1.83333	0.97619	2.33333	1.78571
LTRL590_320031900.1	LtrL590_32:978,173..979,243(-)	356	1071	Cid1 family poly A polymerase, putative	0.333333	4	0.25	5	0.25	5	4.66667	#DIV/0!	1	#DIV/0!	1	0	1	1	0.25	5	0.25	5	0.25	5	0.25	5	5	#DIV/0!	1	0.25	5	0.25	5	0.25	5	0.25	5	0.25	5	0.25	5	3.75	0.333333	4	-3.66667	-4	-2.75	-3	-3.35417
LTRL590_220019500.1	LtrL590_22:564,184..566,144(+)	652	1959	ATP-dependent DEAD/H RNA helicase, putative	0.75	7	1.33333	7	1	6	6.66667	3	4	3	4	1	2	3.33333	0.75	7	1	6	1	6	1	6	6.25	3	4	0.75	7	0.75	7	1	6	1	6	1	6	1	6	5.28571	1	6	-3.33333	-2.91667	-1.95238	-2.66667	-2.71726
LTRL590_250031700.1	LtrL590_25:891,279..892,031(+)	250	753	Arv1-like family, putative	1	4	0.666667	5	1	4	4.33333	#DIV/0!	1	#DIV/0!	1	#DIV/0!	1	1	0.666667	5	0.666667	5	#DIV/0!	0	0.666667	5	3.75	#DIV/0!	1	0.666667	5	0.666667	5	0.666667	5	0.666667	5	0.666667	5	0.666667	5	3.80952	0.666667	5	-3.33333	-2.75	-2.80952	-4	-3.22321
LTRL590_330033400.1	LtrL590_33:1,035,190..1,036,149(+)	319	960	Radial spokehead-like protein, putative	0	1	0	1	0	2	1.33333	0	1	#DIV/0!	0	#DIV/0!	0	0.333333	0	1	#DIV/0!	0	#DIV/0!	0	#DIV/0!	0	0.25	#DIV/0!	0	0	1	0	1	0	1	0	1	#DIV/0!	0	#DIV/0!	0	0.428571	#DIV/0!	0	-1	0.0833333	-0.0952381	0.333333	-0.169643
LTRL590_130007300.1	LtrL590_13:75,645..76,568(-)	307	924	Domain of unknown function (DUF4200), putative	0.5	6	0.2	6	0.25	5	5.66667	2	3	2	3	0	3	3	0.2	6	0.2	6	0.2	6	0.2	6	6	2	3	0.2	6	0.2	6	0.2	6	0.2	6	0.2	6	0.2	6	4.74286	0	5	-2.66667	-3	-1.74286	-2	-2.35238
LTRL590_210012900.1	LtrL590_21:218,810..220,789(-)	659	1980	ATP-binding cassette protein subfamily E, member 1, putative	0.5	3	0	1	0	1	1.66667	0	2	0	2	0	5	3	0.5	3	0.5	3	0.5	3	0.5	3	3	0	2	0.5	3	0.5	3	0.5	3	0.5	3	0.5	3	0.5	3	2.5	1	2	1.33333	0	0.5	1	0.708333
LTRL590_250021500.1	LtrL590_25:579,142..580,461(-)	439	1320	Peptide chain release factor 1, mitochondrial, putative	0	2	0	1	0	2	1.66667	0.333333	4	0.333333	4	1	2	3.33333	0.5	3	0.5	3	#DIV/0!	1	0.5	3	2.5	0.333333	4	0.5	3	0.5	3	0.5	3	0.5	3	0.5	3	0.5	3	2.78571	0.5	3	1.66667	0.833333	0.547619	0.333333	0.845238
LTRL590_240027100.1	LtrL590_24:758,593..759,693(-)	366	1101	hypothetical protein, conserved	1	6	1	8	1	6	6.66667	#DIV/0!	4	#DIV/0!	4	5	6	4.66667	1.33333	7	1.33333	7	1.33333	7	1.33333	7	7	#DIV/0!	4	1.33333	7	1.33333	7	1.33333	7	1.33333	7	1.33333	7	1.33333	7	5.7619	1.33333	7	-2	-2.33333	-1.09524	-2.33333	-1.94048
LTRL590_300005900.1	LtrL590_30:20,101..21,363(-)	420	1263	mitotic cyclin, putative	0.142857	8	0	11	0.166667	7	8.66667	0	11	0	11	0	8	10	0.125	9	0.125	9	0.125	9	0.125	9	9	0	11	0.142857	8	0.125	9	0.125	9	0.125	9	0.125	9	0.142857	8	7.73214	0.142857	8	1.33333	1	2.26786	2	1.6503
LTRL590_350020300.1	LtrL590_35:557,371..557,721(-)	116	351	hypothetical protein, conserved	2.5	7	4	5	2.5	7	6.33333	2	3	2	3	1	2	2.66667	2.5	7	2.5	7	2.5	7	2.5	7	7	2	3	2.5	7	2.5	7	2.5	7	2.5	7	2.5	7	2.5	7	5.78571	2.5	7	-3.66667	-4.33333	-3.11905	-4.33333	-3.8631
LTRL590_360036500.1	LtrL590_36:1,141,188..1,142,996(-)	602	1809	Nodulin-like, putative	1	6	1	6	1	6	6	0.2	6	0.2	6	0	4	5.33333	0.75	7	0.75	7	0.75	7	0.75	7	7	0.2	6	0.75	7	0.75	7	0.75	7	0.75	7	0.75	7	0.75	7	5.96429	0.75	7	-0.666667	-1.66667	-0.630952	-1.66667	-1.15774
LTRL590_130015700.1	LtrL590_13:385,904..387,115(-)	403	1212	Alpha/beta hydrolase family, putative	1	6	1	8	0.75	7	7	2	6	2	6	1	6	6	0.75	7	0.75	7	0.75	7	0.75	7	7	2	6	0.75	7	0.75	7	0.75	7	0.75	7	0.75	7	0.75	7	5.96429	1	6	-1	-1	0.0357143	0	-0.491071
LTRL590_320030600.1	LtrL590_32:933,614..934,126(-)	170	513	hypothetical protein, conserved	2	3	2	3	2	3	3	1	2	1	2	0.5	3	2.33333	1	4	1	4	1	4	0.666667	5	4.25	1	2	1	4	0.666667	5	1	4	1	4	1	4	1	4	3.42857	2	3	-0.666667	-1.91667	-1.09524	-0.666667	-1.08631
LTRL590_240030100.1	LtrL590_24:860,436..861,728(-)	430	1293	fatty-acid desaturase, putative	0.75	7	0.75	7	0.75	7	7	0.25	5	0.25	5	0.333333	4	4.66667	0.75	7	0.75	7	0.75	7	0.75	7	7	0.25	5	0.75	7	0.75	7	0.75	7	0.75	7	0.75	7	0.75	7	5.82143	0.75	7	-2.33333	-2.33333	-1.15476	-2.33333	-2.03869
LTRL590_260008800.1	LtrL590_26:104,366..106,453(-)	695	2088	pseudouridylate synthase-like protein	0.571429	11	0.555556	14	0.571429	11	12	0.7	17	0.7	17	0.875	15	16.3333	0.666667	15	0.666667	15	0.666667	15	1	4	12.25	0.7	17	0.666667	15	0.666667	15	0.666667	15	0.666667	15	0.666667	15	0.666667	15	13.2381	0.625	13	4.33333	4.08333	3.09524	3.33333	3.71131
LTRL590_000006600.1	LTRL590_SCAF000021:1,948..2,889(+)	313	942	Inhibitor of apoptosis-promoting Bax1, putative	0	1	#DIV/0!	0	#DIV/0!	0	0.333333	1	4	1	4	0	2	3.33333	0	1	0	1	0	1	0	1	1	1	4	0	1	0	1	0	1	0	1	0	1	0	1	1.28571	#DIV/0!	0	3	2.33333	2.04762	3.33333	2.67857
LTRL590_220018000.1	LtrL590_22:516,311..518,101(-)	596	1791	intraflagellar transport protein-like protein	0.2	6	0.333333	4	0.25	5	5	0	5	0	5	0	3	4.33333	0.333333	4	0.333333	4	0.333333	4	0.333333	4	4	0	5	0.333333	4	0.333333	4	0.333333	4	0.333333	4	0.333333	4	0.333333	4	3.61905	0.333333	4	-0.666667	0.333333	0.714286	0.333333	0.178571
LTRL590_210010500.1	LtrL590_21:158,828..159,472(+)	214	645	hypothetical protein, conserved	1.5	5	2	6	1.66667	8	6.33333	0.2	6	0.2	6	0.5	3	5	2	6	2	6	2	6	2	6	6	0.2	6	2	6	2	6	2	6	2	6	2	6	2	6	5.42857	1.5	5	-1.33333	-1	-0.428571	0	-0.690476
LTRL590_350012400.1	LtrL590_35:263,402..263,590(+)	62	189	hypothetical protein, conserved	2	3	1	2	1	2	2.33333	#DIV/0!	2	#DIV/0!	2	1	2	2	1	2	0	1	#DIV/0!	0	0	1	1	#DIV/0!	2	1	2	1	2	0	1	1	2	#DIV/0!	0	1	2	1.42857	1	2	-0.333333	1	0.571429	0	0.309524
LTRL590_340028000.1	LtrL590_34:884,015..884,560(-)	181	546	centrin, putative	0.5	3	0.5	3	0.333333	4	3.33333	0.333333	4	0.333333	4	1	2	3.33333	0	2	0	2	0	2	0.5	3	2.25	0.333333	4	0.5	3	0.5	3	0.5	3	0.5	3	0.5	3	0.5	3	2.78571	0	2	0	1.08333	0.547619	1.33333	0.741071
LTRL590_210008000.1	LtrL590_21:85,344..85,721(+)	125	378	Hexokinase, putative	1	4	#DIV/0!	0	1	2	2	0.5	3	0.5	3	0.5	3	3	0	3	0	3	0	3	0.333333	4	3.25	0.5	3	0	3	0	3	0	3	0	3	0	3	0	3	2.57143	0	2	1	-0.25	0.428571	1	0.544643
LTRL590_100005700.1	LtrL590_10:40,121..41,224(+)	367	1104	glycerol-3-phosphate dehydrogenase [NAD+], glycosomal	0.5	3	0	5	0.5	3	3.66667	0	5	0	5	0	4	4.66667	0	4	0	4	0	4	0.2	6	4.5	0	5	0.2	6	0.2	6	0.2	6	0.2	6	0.2	6	0.2	6	5.02857	0	4	1	0.166667	-0.361905	0.666667	0.367857
LTRL590_150012300.1	LtrL590_15:282,739..283,344(+)	201	606	hypothetical protein, conserved	0	2	0	1	0	2	1.66667	0.333333	4	0.333333	4	0.333333	4	4	0.5	3	0.5	3	0.5	3	#DIV/0!	0	2.25	0.333333	4	0.5	3	0.5	3	0.5	3	0.5	3	0.5	3	0.5	3	2.78571	0.5	3	2.33333	1.75	1.21429	1	1.5744
LTRL590_290031800.1	LtrL590_29:1,096,762..1,097,961(+)	399	1200	NLI interacting factor-like phosphatase, putative	0.666667	10	0	2	0	2	4.66667	1	6	1	6	0.5	9	7	1	4	1	4	1	4	0.75	7	4.75	1	6	0.75	7	0.75	7	0.75	7	0.75	7	0.75	7	0.75	7	5.96429	1.5	5	2.33333	2.25	1.03571	2	1.90476
LTRL590_360038300.1	LtrL590_36:1,201,717..1,202,757(-)	346	1041	hypothetical protein, conserved	0.5	3	0.5	3	0.5	3	3	0	2	0	2	0	2	2	0.333333	4	0.333333	4	0.333333	4	0.333333	4	4	0	2	0.333333	4	0.333333	4	0.5	3	0.5	3	0.5	3	0.333333	4	2.92857	0.333333	4	-1	-2	-0.928571	-2	-1.48214
LTRL590_090020400.1	LtrL590_09:523,350..523,928(-)	192	579	hypothetical protein, conserved	1	2	1	2	0.5	3	2.33333	0.25	5	0.25	5	0.5	3	4.33333	0	1	0	1	0	1	0.5	3	1.5	0.25	5	0.5	3	0.5	3	0.5	3	0.5	3	0.5	3	0.5	3	2.92857	1	2	2	2.83333	1.40476	2.33333	2.14286
LTRL590_220019600.1	LtrL590_22:567,045..568,538(+)	497	1494	hypothetical protein, conserved	1.5	10	0.833333	11	0.833333	11	10.6667	0.4	14	0.4	14	0.333333	12	13.3333	0.833333	11	0.833333	11	0.833333	11	0.833333	11	11	0.4	14	0.833333	11	0.833333	11	0.833333	11	0.833333	11	0.8	9	0.833333	11	9.69048	1	10	2.66667	2.33333	3.64286	3.33333	2.99405
LTRL590_260030200.1	LtrL590_26:965,813..966,178(+)	121	366	hypothetical protein, conserved	0.666667	5	0.666667	5	1	6	5.33333	0	2	0	2	1	2	2	0.666667	5	0.666667	5	0.666667	5	0.666667	5	5	0	2	0.666667	5	0.666667	5	0.666667	5	0.666667	5	0.666667	5	0.666667	5	3.95238	0.666667	5	-3.33333	-3	-1.95238	-3	-2.82143
LTRL590_030005300.1	LtrL590_03:9,222..10,367(+)	381	1146	2-aminoethylphosphonate:pyruvateaminotransferas e-like protein	0.25	5	0.75	7	0.25	5	5.66667	0.333333	4	0.333333	4	0.25	5	4.33333	0.75	7	0.75	7	0.75	7	0.75	7	7	0.333333	4	0.75	7	1	8	0.75	7	0.75	7	0.75	7	0.75	7	5.82143	1	6	-1.33333	-2.66667	-1.4881	-1.66667	-1.78869
LTRL590_100008200.1	LtrL590_10:128,267..128,644(-)	125	378	hypothetical protein, conserved	0	2	0	1	0	1	1.33333	0	1	0	1	1	2	1.33333	#DIV/0!	0	#DIV/0!	0	#DIV/0!	0	0	1	0.25	0	1	0	1	0	1	0	1	0	1	0	1	0	1	0.857143	#DIV/0!	0	0	1.08333	0.47619	1.33333	0.723214
LTRL590_200019200.1	LtrL590_20:590,339..590,737(+)	132	399	Protein kinase domain containing protein, putative	0	3	0	1	0	3	2.33333	#DIV/0!	0	#DIV/0!	0	0	1	0.333333	0	2	0	2	0	2	0	2	2	#DIV/0!	0	0	2	0	2	0	1	0	1	0	3	0	3	1.57143	0	3	-2	-1.66667	-1.2381	-2.66667	-1.89286
LTRL590_350020700.1	LtrL590_35:572,054..572,947(-)	297	894	rieske iron-sulfur protein, mitochondrial precursor, putative	0.25	5	0.333333	4	0.25	5	4.66667	0	2	0	2	0	2	2	0.333333	4	0.333333	4	0.333333	4	0.333333	4	4	0	2	0.333333	4	0.333333	4	0.333333	4	0.333333	4	0.333333	4	0.333333	4	3.19048	0.333333	4	-2.66667	-2	-1.19048	-2	-1.96429
LTRL590_050005600.1	LtrL590_05:21,578..21,853(+)	91	276	dynein light chain, putative	0.5	3	0.5	3	0.333333	4	3.33333	0	1	0	1	1	2	1.33333	0.5	3	0.5	3	0.5	3	0.5	3	3	0	1	0.5	3	0.5	3	0.5	3	0.5	3	0.5	3	0.5	3	2.35714	1	2	-2	-1.66667	-1.02381	-0.666667	-1.33929
LTRL590_130005100.1	LtrL590_13:5,166..6,341(-)	391	1176	cis-prenyltransferase-like protein	1.5	5	2	6	2	6	5.66667	3	8	3	8	#DIV/0!	5	7	2.5	7	2.5	7	2.5	7	2.5	7	7	3	8	2.5	7	1.66667	8	2.5	7	2.5	7	2.5	7	2.5	7	6.64286	2	6	1.33333	0	0.357143	1	0.672619
LTRL590_080005500.1	LtrL590_08:15,730..16,287(+)	185	558	phosphoglycerate mutase protein, putative	1	2	1	2	1	2	2	1	6	1	6	1.5	5	5.66667	1	2	1	2	1	2	1	2	2	1	6	1	2	1	2	1	2	1	2	1	2	1	2	2.42857	#DIV/0!	1	3.66667	3.66667	3.2381	4.66667	3.80952
LTRL590_350020100.1	LtrL590_35:554,963..555,316(-)	117	354	hypothetical protein	2	3	0.333333	4	1	2	3	#DIV/0!	0	#DIV/0!	0	#DIV/0!	0	0	1	2	1	2	1	2	1	2	2	#DIV/0!	0	1	2	1	2	1	2	1	2	1	2	1	2	1.57143	1	2	-3	-2	-1.57143	-2	-2.14286
LTRL590_360039200.1	LtrL590_36:1,232,051..1,232,758(-)	235	708	bromodomain factor 2 protein, putative	#DIV/0!	0	#DIV/0!	0	#DIV/0!	0	0	0.666667	5	0.666667	5	1	2	4	0	1	0	1	0	1	0	1	1	0.666667	5	0	1	0	1	0	1	0	1	0	1	0	1	1.42857	0	1	4	3	2.57143	3	3.14286
LTRL590_000025100.1	LTRL590_SCAF000112:191,955..192,485(+)	176	531	hypothetical protein	#DIV/0!	1	#DIV/0!	0	2	3	1.33333	1.5	5	1.5	5	1	2	4	0	1	0	1	0	1	0	1	1	1.5	5	1	2	1	2	1	2	1	2	1	2	1	2	2.28571	0	1	2.66667	3	1.71429	3	2.59524
LTRL590_260014800.1	LtrL590_26:306,502..307,734(-)	410	1233	hypothetical protein, conserved	0	6	0	6	0	5	5.66667	1	6	1	6	1	4	5.33333	0	7	0	7	0	7	0	2	5.75	1	6	0	7	0	7	0	7	0.142857	8	0.142857	8	0	7	6.14286	0	7	-0.333333	-0.416667	-0.809524	-1.66667	-0.806548
LTRL590_310036700.1	LtrL590_31:1,325,982..1,326,593(-)	203	612	hypothetical protein, conserved	0	2	0	1	1	2	1.66667	2	3	2	3	2	3	3	2	3	2	3	1	2	2	3	2.75	2	3	2	3	2	3	2	3	2	3	2	3	2	3	2.85714	2	3	1.33333	0.25	0.142857	0	0.431548
LTRL590_340033900.1	LtrL590_34:1,128,416..1,129,714(+)	432	1299	Patatin-like phospholipase, putative	0.4	7	0.6	8	0.5	9	8	0.5	9	0.5	9	1.5	5	7.66667	0.4	7	0.4	7	0.4	7	0.25	10	7.75	0.5	9	0.25	10	0.25	10	0.25	10	0.25	10	0.25	10	0.25	10	8.46429	0.4	7	-0.333333	-0.0833333	-0.797619	0.666667	-0.136905
LTRL590_280017000.1	LtrL590_28:423,918..425,807(+)	629	1890	WD domain, G-beta repeat, putative	0	4	0	3	0	4	3.66667	0.25	5	0.25	5	0.666667	5	5	0	3	0	3	0	3	#DIV/0!	0	2.25	0.25	5	0	2	0	3	0	3	0	3	0	3	0	2	2.57143	0	3	1.33333	2.75	2.42857	2	2.12798
LTRL590_280036700.1	LtrL590_28:1,155,560..1,156,099(-)	179	540	hypothetical protein, conserved	1	4	0.5	3	0.5	3	3.33333	3	4	3	4	1	4	4	0.5	3	0.5	3	0.5	3	#DIV/0!	0	2.25	3	4	0.5	3	0.5	3	0.5	3	0.5	3	0.5	3	1	4	2.92857	0	2	0.666667	1.75	1.07143	2	1.37202
LTRL590_340033800.1	LtrL590_34:1,121,273..1,121,629(+)	118	357	hypothetical protein, conserved	#DIV/0!	0	#DIV/0!	0	#DIV/0!	0	0	0	4	0	4	0	3	3.66667	#DIV/0!	0	#DIV/0!	0	#DIV/0!	0	0	1	0.25	0	4	0	1	0	1	0	1	0	1	0	1	0	1	1.28571	#DIV/0!	0	3.66667	3.41667	2.38095	3.66667	3.28274
LTRL590_340048000.1	LtrL590_34:1,601,679..1,602,608(+)	309	930	protein serine/threonine phosphatase, putativee	#DIV/0!	0	#DIV/0!	0	#DIV/0!	0	0	0	4	0	4	0.5	3	3.66667	#DIV/0!	0	#DIV/0!	0	#DIV/0!	0	0	1	0.25	0	4	0	1	0	1	0	1	0	1	0	1	0	1	1.28571	#DIV/0!	0	3.66667	3.41667	2.38095	3.66667	3.28274
LTRL590_280007200.1	LtrL590_28:68,606..69,676(+)	356	1071	palmitoyl acyltransferase 9, putative	1.5	5	1.5	5	1.5	5	5	5	6	7	8	1.5	5	6.33333	1.5	5	1.5	5	1.5	5	#DIV/0!	0	3.75	7	8	1.5	5	1.5	5	1.5	5	1.5	5	1.5	5	1.5	5	4.92857	1.5	5	1.33333	2.58333	1.40476	1.33333	1.66369
LTRL590_150006900.1	LtrL590_15:74,796..75,287(-)	163	492	Cytochrome b5-like Heme/Steroid binding domain containing protein, putative	0.666667	5	0.333333	4	0.25	5	4.66667	0	3	0	3	0	3	3	0.2	6	0.2	6	0.2	6	0.2	6	6	0	3	0.2	6	0.2	6	0.2	6	0.2	6	0.2	6	0.2	6	4.74286	0.25	5	-1.66667	-3	-1.74286	-2	-2.10238
LTRL590_360041500.1	LtrL590_36:1,283,848..1,284,177(-)	109	330	hypothetical protein	3	4	3	4	1.5	5	4.33333	#DIV/0!	2	#DIV/0!	2	#DIV/0!	2	2	3	4	3	4	3	4	3	4	4	#DIV/0!	2	3	4	3	4	2	3	3	4	3	4	2	3	3.28571	2	3	-2.33333	-2	-1.28571	-1	-1.65476
LTRL590_280023300.1	LtrL590_28:647,024..647,347(-)	107	324	hypothetical protein	1	2	1	2	3	4	2.66667	0.5	3	0.5	3	0.5	3	3	3	4	3	4	3	4	#DIV/0!	0	3	0.5	3	3	4	3	4	3	4	3	4	3	4	3	4	3.71429	3	4	0.333333	0	-0.714286	-1	-0.345238
LTRL590_350033900.1	LtrL590_35:1,081,319..1,081,744(-)	141	426	hypothetical protein	5	6	6	7	5	6	6.33333	2	3	2	3	1.5	5	3.66667	5	6	5	6	5	6	5	6	6	2	3	5	6	#DIV/0!	5	5	6	5	6	5	6	5	6	5.28571	4	5	-2.66667	-2.33333	-1.61905	-1.33333	-1.9881
LTRL590_050012600.1	LtrL590_05:303,330..303,821(+)	163	492	Got1/Sft2-like family, putative	#DIV/0!	1	#DIV/0!	1	3	4	2	0.75	7	0.75	7	0.6	8	7.33333	2	3	2	3	2	3	#DIV/0!	1	2.5	0.75	7	2	3	2	3	2	3	2	3	2	3	2	3	3.42857	2	3	5.33333	4.83333	3.90476	4.33333	4.60119
LTRL590_340024400.1	LtrL590_34:758,393..758,578(-)	61	186	hypothetical protein, conserved	#DIV/0!	0	#DIV/0!	0	#DIV/0!	0	0	0	1	0	1	0	1	1	#DIV/0!	0	#DIV/0!	0	#DIV/0!	0	0	2	0.5	0	1	0	2	0	1	0	2	0	2	0	2	0	2	1.42857	0	1	1	0.5	-0.428571	0	0.267857
LTRL590_240030000.1	LtrL590_24:856,972..858,102(-)	376	1131	ATP:cob(I)alamin adenosyltransferase, putative	6	7	3	8	3.5	9	8	4	5	4	5	#DIV/0!	2	4	3	8	3	8	3	8	3	8	8	4	5	3	8	3	8	3	8	3	8	3	8	3	8	6.85714	2.5	7	-4	-4	-2.85714	-3	-3.46429
LTRL590_320026100.1	LtrL590_32:763,801..765,429(-)	542	1629	Vitamin B6 photo-protection and homoeostasis, putative	2	3	2	3	2	3	3	1	6	1	6	0.25	5	5.66667	3	4	3	4	3	4	3	4	4	1	6	3	4	3	4	3	4	3	4	3	4	3	4	4.14286	2	3	2.66667	1.66667	1.52381	2.66667	2.13095
LTRL590_360044700.1	LtrL590_36:1,371,526..1,372,155(-)	209	630	Small acidic protein family, putative	0	1	0	1	0	1	1	0.25	5	0.25	5	0.5	3	4.33333	0	2	0	2	0	2	0	2	2	0.25	5	0	2	0	2	0	2	0	2	0	2	0	2	2.14286	0	1	3.33333	2.33333	2.19048	3.33333	2.79762
LTRL590_320022600.1	LtrL590_32:631,521..631,709(-)	62	189	hypothetical protein	#DIV/0!	3	#DIV/0!	3	#DIV/0!	3	3	1.5	5	1.5	5	0	2	4	3	4	3	4	3	4	3	4	4	1.5	5	3	4	1.5	5	3	4	3	4	3	4	3	4	4.14286	#DIV/0!	3	1	0	-0.142857	1	0.464286
LTRL590_260031300.1	LtrL590_26:999,057..999,317(+)	86	261	hypothetical protein	#DIV/0!	0	#DIV/0!	0	#DIV/0!	0	0	0.5	3	0.5	3	0.5	3	3	0	1	0	1	0	1	0	1	1	0.5	3	0	1	0	1	0	1	0	1	0	1	0	1	1.14286	#DIV/0!	0	3	2	1.85714	3	2.46429
LTRL590_350032700.1	LtrL590_35:1,016,262..1,017,170(-)	302	909	QA-SNARE protein putative	1	8	0.666667	5	0.666667	5	6	0.5	6	0.5	6	0.75	7	6.33333	0.666667	5	0.666667	5	0.666667	5	0.666667	5	5	0.5	6	0.666667	5	0.666667	5	0.666667	5	0.666667	5	0.666667	5	0.666667	5	4.52381	0.666667	5	0.333333	1.33333	1.80952	1.33333	1.20238
LTRL590_280028800.1	LtrL590_28:872,256..874,409(+)	717	2154	cullin 2, putative	0.111111	10	0.222222	11	0.111111	10	10.3333	0.5	3	0.5	3	0.25	5	3.66667	0.0909091	12	0.0909091	12	0.0909091	12	0	2	9.5	0.5	3	0.0909091	12	0.0909091	12	0.0909091	12	0.0909091	12	0.0909091	12	0.0909091	12	9.01299	0.125	9	-6.66667	-5.83333	-5.34632	-5.33333	-5.79491
LTRL590_270012400.1	LtrL590_27:287,038..288,390(+)	450	1353	hypothetical protein, conserved	0.8	9	1	10	0.833333	11	10	0.777778	16	0.777778	16	1.75	11	14.3333	0.714286	12	0.428571	10	0.714286	12	0.714286	12	11.5	0.777778	16	0.714286	12	0.714286	12	0.714286	12	0.714286	12	0.714286	12	0.714286	12	10.9592	0.571429	11	4.33333	2.83333	3.37415	3.33333	3.46854
LTRL590_210014600.1	LtrL590_21:299,957..300,601(+)	214	645	hypothetical protein, conserved	0	2	0	1	0	2	1.66667	0	2	0	2	0	4	2.66667	0	3	0	3	0	3	0	3	3	0	2	0	3	0.333333	4	0	3	0	3	0	3	0	3	2.57143	0	3	1	-0.333333	0.0952381	-0.333333	0.107143
LTRL590_220021100.1	LtrL590_22:636,449..636,760(+)	103	312	hypothetical protein, conserved	2	3	1	2	2	3	2.66667	#DIV/0!	2	#DIV/0!	2	3	4	2.66667	3	4	3	4	3	4	3	4	4	#DIV/0!	2	3	4	3	4	3	4	3	4	3	4	3	4	3.57143	3	4	0	-1.33333	-0.904762	-1.33333	-0.892857
LTRL590_120006400.1	LtrL590_12:23,905..24,777(+)	290	873	Plus-3 domain/Zinc finger, C3HC4 type (RING finger) containing protein, putative	0.25	5	0.25	5	0.2	6	5.33333	1	2	1	2	0.25	5	3	0.25	5	0.25	5	0.25	5	0.25	5	5	1	2	0.25	5	0.25	5	0.25	5	0.25	5	0.25	5	0.25	5	3.89286	0.25	5	-2.33333	-2	-0.892857	-2	-1.80655
LTRL590_320037200.1	LtrL590_32:1,177,925..1,179,841(-)	638	1917	tubulin-tyrosine ligase-like protein	1.5	10	1.25	9	1.25	9	9.33333	0.6	8	0.6	8	0.6	8	8	1.5	10	1.5	10	1.5	10	1.5	10	10	0.6	8	1.5	10	1.5	10	1.5	10	1.5	10	1.5	10	1.5	10	8.5	1.25	9	-1.33333	-2	-0.5	-1	-1.20833
LTRL590_300005800.1	LtrL590_30:18,550..19,434(-)	294	885	hypothetical protein, conserved	#DIV/0!	1	0.25	5	1	2	2.66667	0.25	5	0.25	5	0.333333	4	4.66667	0.333333	4	0.333333	4	0.333333	4	0.333333	4	4	0.25	5	0.333333	4	0.333333	4	0.333333	4	0.333333	4	0.333333	4	0.333333	4	3.61905	0.333333	4	2	0.666667	1.04762	0.666667	1.09524
LTRL590_350027100.1	LtrL590_35:798,399..799,853(+)	484	1455	short chain dehydrogenase, putative	1	4	1	6	1	4	4.66667	0.5	6	0.4	7	0.666667	5	6	1	6	1	6	1	6	1	6	6	0.4	7	1	6	1	6	1	6	1	6	1	6	1	6	5.42857	1	6	1.33333	0	0.571429	0	0.47619
LTRL590_260007300.1	LtrL590_26:60,228..62,051(-)	607	1824	ras-like small GTPases, putative	0.5	9	0.6	8	0.6	8	8.33333	1	2	1	2	0.5	3	2.33333	0.428571	10	0.428571	10	0.428571	10	0	2	8	1	2	0.428571	10	0.428571	10	0.428571	10	0.428571	10	0.428571	10	0.428571	10	7.4898	0.5	9	-6	-5.66667	-5.15646	-6.66667	-5.87245
LTRL590_180021500.1	LtrL590_18:738,307..738,738(+)	143	432	Got1/Sft2-like family, putative	0	1	0	1	#DIV/0!	0	0.666667	0	2	0	2	1	2	2	0	2	0	2	0	2	0	2	2	0	2	0	2	0	2	0	2	0	2	0	2	0	2	1.71429	0	2	1.33333	0	0.285714	0	0.404762
LTRL590_040010700.1	LtrL590_04:227,360..228,262(-)	300	903	spermidine synthase	0	1	0	1	0.5	3	1.66667	1	4	1	4	0.5	6	4.66667	0	3	0	3	0	3	0	3	3	1	4	0	3	0	3	0	3	0	3	0	3	0	3	2.71429	0	3	3	1.66667	1.95238	1.66667	2.07143
LTRL590_220011800.1	LtrL590_22:259,036..259,335(-)	99	300	hypothetical protein, conserved	#DIV/0!	1	1	2	1	2	1.66667	1	4	1	4	1	4	4	#DIV/0!	0	#DIV/0!	0	#DIV/0!	0	2	3	0.75	1	4	1	2	1	2	1	2	1	2	1	2	1	2	2.14286	#DIV/0!	1	2.33333	3.25	1.85714	3	2.61012
LTRL590_340009300.1	LtrL590_34:146,576..147,838(+)	420	1263	hypothetical protein, conserved	1	2	1	2	2	3	2.33333	2	3	2	3	1	6	4	1	2	1	2	1	2	0.333333	4	2.5	2	3	0.333333	4	0.666667	5	0.333333	4	0.333333	4	0.333333	4	0.333333	4	3.47619	1	2	1.66667	1.5	0.52381	2	1.42262
LTRL590_300029800.1	LtrL590_30:893,511..894,368(-)	285	858	hypothetical protein, conserved	#DIV/0!	3	#DIV/0!	3	1.5	5	3.66667	1	4	1	4	1	2	3.33333	1.5	5	1.5	5	1.5	5	1.5	5	5	1	4	1.5	5	1.5	5	1.5	5	1.5	5	1.5	5	1.5	5	4.35714	1.5	5	-0.333333	-1.66667	-1.02381	-1.66667	-1.17262
LTRL590_350017400.1	LtrL590_35:459,551..460,252(+)	233	702	short chain dehydrogenase, putative	0.333333	4	1	6	0.666667	5	5	0	1	0	1	0	1	1	0.666667	5	0.666667	5	0.666667	5	0.666667	5	5	0	1	0.666667	5	0.666667	5	0.666667	5	0.666667	5	0.666667	5	0.666667	5	3.80952	0.333333	4	-4	-4	-2.80952	-3	-3.45238
LTRL590_350021000.1	LtrL590_35:584,206..585,438(-)	410	1233	Methyltransferase domain containing protein, putative	0.5	6	0.5	6	0.4	7	6.33333	0.5	6	0.5	6	1	8	6.66667	0.5	6	0.5	6	0.5	6	0.5	6	6	0.5	6	0.5	6	0.5	6	0.333333	4	0.5	6	0.5	6	0.5	6	5.19048	0.666667	5	0.333333	0.666667	1.47619	1.66667	1.03571
LTRL590_260011500.1	LtrL590_26:186,737..187,414(-)	225	678	Protein of unknown function (DUF2012), putative	0.5	3	1	4	1	4	3.66667	0.6	8	0.6	8	0.5	6	7.33333	0.666667	5	0.666667	5	0.666667	5	0	1	4	0.6	8	0.666667	5	0.666667	5	0.666667	5	0.666667	5	0.666667	5	0.666667	5	4.80952	0.666667	5	3.66667	3.33333	2.52381	2.33333	2.96429
LTRL590_300012800.1	LtrL590_30:237,347..238,039(+)	230	693	hypothetical protein, conserved	0	3	0	2	0	3	2.66667	0.5	3	0.5	3	0.5	3	3	0.333333	4	0.333333	4	0.333333	4	0.333333	4	4	0.5	3	0.333333	4	0.333333	4	0.333333	4	0.333333	4	0.333333	4	0.333333	4	3.33333	0.333333	4	0.333333	-1	-0.333333	-1	-0.5
LTRL590_360035100.1	LtrL590_36:1,096,110..1,097,132(-)	340	1023	Methyltransferase domain containing protein, putative	0.75	7	0.75	7	0.75	7	7	1.33333	7	1.33333	7	1.5	10	8	0.6	8	0.6	8	0.6	8	0.6	8	8	1.33333	7	0.6	8	0.6	8	0.6	8	0.6	8	0.6	8	0.6	8	6.8	0.6	8	1	0	1.2	0	0.55
LTRL590_280028200.1	LtrL590_28:855,815..856,975(-)	386	1161	tRNA threonylcarbamoyl adenosine modification protein, Sua5/YciO/YrdC/YwlC family, putative	0.333333	4	0.333333	4	0.666667	5	4.33333	1	2	1	2	1	2	2	0.333333	4	0.333333	4	0.333333	4	#DIV/0!	0	3	1	2	0.333333	4	0.333333	4	0.333333	4	0.333333	4	0.333333	4	0.333333	4	3.19048	0.5	3	-2.33333	-1	-1.19048	-1	-1.38095
LTRL590_330040300.1	LtrL590_33:1,383,803..1,384,402(+)	199	600	46 kD virulence factor	0.25	5	0.25	5	0.6	8	6	1.5	5	1.5	5	0.5	3	4.33333	0.5	6	0.5	6	0.5	6	#DIV/0!	1	4.75	1.5	5	0.5	6	0.5	6	0.5	6	0.5	6	0.5	6	0.5	6	5.07143	0.5	6	-1.66667	-0.416667	-0.738095	-1.66667	-1.12202
LTRL590_260033000.1	LtrL590_26:1,051,926..1,052,783(+)	285	858	CAAX prenyl protease 2, putative	1.25	9	1.33333	7	1.66667	8	8	5	6	5	6	3	8	6.66667	1	8	1	8	1	8	1	8	8	5	6	1	8	1	8	1	8	1	8	1	8	1	8	6.71429	1	8	-1.33333	-1.33333	-0.047619	-1.33333	-1.0119
LTRL590_240028000.1	LtrL590_24:786,518..787,297(-)	259	780	3-oxoacyl-(acyl-carrier protein) reductase, putative	0	5	0	5	0	5	5	0	1	0	1	0	2	1.33333	0	5	0	5	0	5	0	5	5	0	1	0	5	0	5	0	5	0	5	0	5	0	5	3.71429	0	5	-3.66667	-3.66667	-2.38095	-3.66667	-3.34524
LTRL590_040008000.1	LtrL590_04:94,770..96,356(+)	528	1587	beta-fructofuranosidase, putative	#DIV/0!	1	#DIV/0!	2	#DIV/0!	1	1.33333	#DIV/0!	0	#DIV/0!	0	1	2	0.666667	1	2	2	3	1	2	2	3	2.5	#DIV/0!	0	1	2	1	2	1	2	3	4	#DIV/0!	1	1	2	1.71429	#DIV/0!	1	-0.666667	-1.83333	-1.04762	-0.333333	-0.970238
LTRL590_330020200.1	LtrL590_33:483,501..484,745(+)	414	1245	glutamine aminotransferase, putative	1.33333	7	1.66667	8	1	8	7.66667	#DIV/0!	1	#DIV/0!	1	0	2	1.33333	2	9	2	9	2	9	#DIV/0!	1	7	#DIV/0!	1	1.66667	8	1.66667	8	1.66667	8	1.66667	8	1.66667	8	1.66667	8	6.09524	1.33333	7	-6.33333	-5.66667	-4.7619	-5.66667	-5.60714
LTRL590_300010500.1	LtrL590_30:160,896..162,305(-)	469	1410	bystin, putative	#DIV/0!	2	1	4	#DIV/0!	2	2.66667	1	4	1	4	0.8	9	5.66667	3	4	3	4	3	4	3	4	4	1	4	3	4	3	4	3	4	3	4	3	4	3	4	3.85714	3	4	3	1.66667	1.80952	1.66667	2.03571
LTRL590_150021700.1	LtrL590_15:599,262..600,512(-)	416	1251	Radical SAM superfamily/Wyosine base formation, putative	0	2	0	2	0	1	1.66667	0	4	0	4	0	4	4	0	3	0	3	0	3	0	3	3	0	4	0	3	0	4	0	3	0	3	0	3	0	3	2.85714	0	3	2.33333	1	1.14286	1	1.36905
LTRL590_350027700.1	LtrL590_35:820,905..821,780(+)	291	876	hypothetical protein, conserved	0	4	0	4	0	5	4.33333	#DIV/0!	0	#DIV/0!	0	#DIV/0!	0	0	0	4	0	4	0	4	0	4	4	#DIV/0!	0	0	4	0	4	0	4	0	4	0	4	0	4	2.85714	0	4	-4.33333	-4	-2.85714	-4	-3.79762
LTRL590_290031200.1	LtrL590_29:1,071,842..1,072,462(-)	206	621	Ubiquinone biosynthesis protein COQ7, putative	0.5	3	1	2	2	3	2.66667	0.5	6	0.5	6	1	4	5.33333	1	4	1	4	1	4	1	4	4	0.5	6	1	4	1	4	1	4	1	4	1	4	1	4	3.85714	1	4	2.66667	1.33333	1.47619	1.33333	1.70238
LTRL590_310041100.1	LtrL590_31:1,456,111..1,456,902(-)	263	792	emp24/gp25L/p24 family/GOLD, putative	#DIV/0!	0	#DIV/0!	0	1	2	0.666667	0	2	0	2	#DIV/0!	0	1.33333	0	2	0	2	0	2	0	2	2	0	2	0	2	0	3	0	2	0	2	0	2	0	2	1.85714	0	2	0.666667	-0.666667	-0.52381	-0.666667	-0.297619
LTRL590_210025100.1	LtrL590_21:709,623..710,030(-)	135	408	hypothetical protein, conserved	0.333333	4	0.333333	4	0	3	3.66667	0.333333	4	0.333333	4	0.5	3	3.66667	0.666667	5	0.666667	5	0.666667	5	0.666667	5	5	0.333333	4	0.666667	5	0.666667	5	0.666667	5	0.666667	5	0.666667	5	0.666667	5	4.2381	0.666667	5	0	-1.33333	-0.571429	-1.33333	-0.809524
LTRL590_030005400.1	LtrL590_03:13,549..14,721(+)	390	1173	Met-10+ like-protein, putative	0.5	9	0.6	8	0.5	9	8.66667	0.8	9	0.8	9	0.25	5	7.66667	0.6	8	0.6	8	0.6	8	0.6	8	8	0.8	9	0.6	8	0.6	8	0.6	8	0.6	8	0.6	8	0.6	8	7.08571	0.6	8	-1	-0.333333	0.580952	-0.333333	-0.271429
LTRL590_230017300.1	LtrL590_23:444,152..444,613(-)	153	462	hypothetical protein	1	2	1	2	0	1	1.66667	#DIV/0!	3	#DIV/0!	3	#DIV/0!	2	2.66667	2	3	2	3	2	3	2	3	3	#DIV/0!	3	2	3	2	3	2	3	2	3	2	3	2	3	2.85714	#DIV/0!	2	1	-0.333333	-0.190476	0.666667	0.285714
LTRL590_030007000.1	LtrL590_03:53,952..54,893(+)	313	942	hypothetical protein, conserved	0	3	0	3	0	4	3.33333	#DIV/0!	0	#DIV/0!	0	#DIV/0!	1	0.333333	0	3	0	3	0	3	0	3	3	#DIV/0!	0	0	3	0	3	0	3	0	3	0	3	0	3	2.14286	0	2	-3	-2.66667	-1.80952	-1.66667	-2.28571
LTRL590_250028100.1	LtrL590_25:803,624..806,287(-)	887	2664	elongation factor 2-like protein	0.5	9	0.714286	12	0.5	9	10	0.3	13	0.3	13	0.166667	7	11	0.444444	13	0.444444	13	0.4	7	0.444444	13	11.5	0.3	13	0.444444	13	0.444444	13	0.444444	13	0.444444	13	0.444444	13	0.444444	13	11.2063	0.571429	11	1	-0.5	-0.206349	0	0.0734127
LTRL590_050005100.1	LtrL590_05:7,674..8,093(+)	139	420	hypothetical protein, conserved	#DIV/0!	0	#DIV/0!	0	#DIV/0!	0	0	1	6	1	6	0.5	3	5	0	1	0	1	0	1	#DIV/0!	0	0.75	1	6	0	1	0	1	0	1	0	1	0	1	0	1	1.57143	0	1	5	4.25	3.42857	4	4.16964
LTRL590_230005600.1	LtrL590_23:13,810..14,331(+)	173	522	hypothetical protein, conserved	0.5	3	0.5	3	0.5	3	3	2	3	2	3	1	2	2.66667	0.333333	4	0.333333	4	0.333333	4	0	1	3.25	2	3	0.333333	4	0.333333	4	0	1	0	1	0	1	0.333333	4	2.42857	0.333333	4	-0.333333	-0.583333	0.238095	-1.33333	-0.502976
LTRL590_230006400.1	LtrL590_23:39,836..40,339(+)	167	504	vacuolar type h+ ATPase subunit, putative	0.5	3	0.5	3	0.5	3	3	0.5	3	0.5	3	1	2	2.66667	0.333333	4	0.333333	4	0.333333	4	0	1	3.25	0.5	3	0.333333	4	0.333333	4	0	1	0	1	0	1	0.333333	4	2.42857	0.333333	4	-0.333333	-0.583333	0.238095	-1.33333	-0.502976
LTRL590_280008600.1	LtrL590_28:117,516..118,694(-)	392	1179	Saccharopine dehydrogenase, putative	0.666667	5	0.666667	5	1	4	4.66667	0.833333	11	0.833333	11	0.833333	11	11	0.666667	5	0.666667	5	0.666667	5	#DIV/0!	0	3.75	0.833333	11	0.666667	5	0.666667	5	0.666667	5	0.666667	5	0.666667	5	0.666667	5	5.2381	0.666667	5	6.33333	7.25	5.7619	6	6.33631
LTRL590_200006400.1	LtrL590_20:42,665..43,999(-)	444	1335	phosphatidylinositol-4-phosphate 5-kinase related	0.5	6	1	6	0.666667	5	5.66667	0.333333	8	0.333333	8	0.5	6	7.33333	0.4	7	0.4	7	0.4	7	0.4	7	7	0.333333	8	0.4	7	0.4	7	0.4	7	0.4	7	0.4	7	0.4	7	6.2	0.4	7	1.66667	0.333333	1.13333	0.333333	0.866667
LTRL590_120005000.1	LtrL590_12:1,021..1,206(-)	61	186	hypothetical protein	1	6	0.75	7	0.75	7	6.66667	2	6	1.25	9	1.33333	7	7.33333	1	8	1	8	1	8	1	8	8	1.25	9	1	8	1	8	1	8	1	8	3	4	1	8	6.57143	1.33333	7	0.666667	-0.666667	0.761905	0.333333	0.27381
LTRL590_130005400.1	LtrL590_13:9,994..10,884(-)	296	891	ribonuclease HII, putative	1	6	1.33333	7	1.66667	8	7	1	4	1	4	3	4	4	1.33333	7	1.33333	7	1.33333	7	1.33333	7	7	1	4	1.33333	7	1.33333	7	1.33333	7	1.33333	7	1.33333	7	1.33333	7	5.7619	1	6	-3	-3	-1.7619	-2	-2.44048
LTRL590_320009400.1	LtrL590_32:169,325..169,825(-)	166	501	60S ribosomal protein L17, putative	0	4	0	1	0	1	2	0	6	0	6	0	4	5.33333	0	3	0	3	0	3	0	3	3	0	6	0	3	0	5	0	3	0	3	0	5	0	3	3.57143	0	3	3.33333	2.33333	1.7619	2.33333	2.44048
LTRL590_330020300.1	LtrL590_33:485,509..486,336(+)	275	828	QA-SNARE protein putative	0	1	#DIV/0!	1	0	1	1	1	8	1	8	0	3	6.33333	0	2	0	2	0	2	0	2	2	1	8	0	2	0	2	0	2	0	2	0	2	0	2	2.57143	0	2	5.33333	4.33333	3.7619	4.33333	4.44048
LTRL590_230021000.1	LtrL590_23:566,730..568,325(+)	531	1596	membrane-bound acid phosphatase 2	2	6	2	6	1.5	5	5.66667	0.571429	11	0.571429	11	1.66667	8	10	2.5	7	2.5	7	2.5	7	2.5	7	7	0.571429	11	2.5	7	2.5	7	2.5	7	2.5	7	2.5	7	2.5	7	6.92857	2.5	7	4.33333	3	3.07143	3	3.35119
LTRL590_270007600.1	LtrL590_27:61,144..62,331(-)	395	1188	flap endonuclease-1 (FEN-1), putative	0.5	6	0.5	6	0.6	8	6.66667	0.666667	5	0.666667	5	1	4	4.66667	0.5	6	0.5	6	0.5	6	0.5	6	6	0.666667	5	0.5	6	0.5	6	0.5	6	0.5	6	0.5	6	0.5	6	5.07143	0.5	6	-2	-1.33333	-0.404762	-1.33333	-1.26786
LTRL590_050014100.1	LtrL590_05:363,658..365,697(+)	679	2040	metallo-peptidase, Clan M-, Family M49	1	4	2	3	0.666667	5	4	0.333333	4	0.333333	4	0.25	5	4.33333	1	6	1	6	1	6	2	3	5.25	0.333333	4	1	6	1	6	1	6	1	6	1	6	1	6	5	1	4	0.333333	-0.916667	-0.666667	0.333333	-0.229167
LTRL590_080009100.1	LtrL590_08:141,299..141,961(+)	220	663	hypothetical protein, conserved	0.25	5	0.2	6	0	4	5	0.333333	4	0.5	3	1	2	3	0.2	6	0.2	6	0.2	6	0.2	6	6	0.5	3	0.2	6	0.2	6	0.2	6	0.2	6	0.2	6	0.2	6	4.74286	0.2	6	-2	-3	-1.74286	-3	-2.43571
LTRL590_360065700.1	LtrL590_36:2,126,365..2,127,441(-)	358	1077	phosphoribosylpyrophosphate synthetase, putative	0	1	0	1	0	1	1	0.2	6	0.2	6	0.333333	4	5.33333	0	1	0	1	0	1	0	2	1.25	0.2	6	0	2	0	3	0	2	0	2	0	2	0	2	2.42857	0	2	4.33333	4.08333	2.90476	3.33333	3.66369
LTRL590_020010100.1	LtrL590_02:214,909..215,742(-)	277	834	voltage-dependent anion-selective channel, putative	0.75	7	0.75	7	0.75	7	7	1	4	1	4	1	4	4	0.75	7	0.75	7	0.75	7	0.75	7	7	1	4	0.75	7	0.75	7	0.75	7	0.75	7	0.75	7	0.75	7	5.67857	0.75	7	-3	-3	-1.67857	-3	-2.66964
LTRL590_210015200.1	LtrL590_21:315,774..316,490(+)	238	717	xanthine phosphoribosyltransferase	0	3	0	3	0.25	5	3.66667	0	4	0	4	0	3	3.66667	0	5	0	5	0	5	0	5	5	0	4	0	5	0	5	0	5	0	5	0	5	0	5	4.14286	0	5	0	-1.33333	-0.47619	-1.33333	-0.785714
LTRL590_350030800.1	LtrL590_35:969,105..970,475(+)	456	1371	Double RNA binding domain protein 9	0.4	7	0.166667	7	0.166667	7	7	0.25	5	0.25	5	2	3	4.33333	0.166667	7	0	6	0.166667	7	0.142857	8	7	0.25	5	0.166667	7	0.166667	7	0.166667	7	0.166667	7	0.166667	7	0.166667	7	5.7381	0.2	6	-2.66667	-2.66667	-1.40476	-1.66667	-2.10119
LTRL590_280029700.1	LtrL590_28:902,107..903,312(+)	401	1206	glycoprotein 96-92, putative	2	9	1	8	0.875	15	10.6667	2.5	14	3.5	9	1.66667	16	13	1.2	11	1.2	11	1.2	11	3	4	9.25	3.5	9	1.2	11	1.2	11	1.2	11	1.2	11	1.2	11	1.2	11	9.31429	1.5	10	2.33333	3.75	3.68571	3	3.19226
LTRL590_350030700.1	LtrL590_35:965,732..966,379(+)	215	648	hypothetical protein, conserved	1.66667	8	1.66667	8	1.66667	8	8	1.5	5	1.5	5	3	8	6	1.66667	8	1.66667	8	1.66667	8	1.66667	8	8	1.5	5	1.66667	8	1.66667	8	1.66667	8	1.66667	8	1.66667	8	1.66667	8	6.66667	1.66667	8	-2	-2	-0.666667	-2	-1.66667
LTRL590_330020600.1	LtrL590_33:489,655..490,083(+)	142	429	hypothetical protein	1	2	1	2	#DIV/0!	1	1.66667	3	4	3	4	2	3	3.66667	2	3	2	3	2	3	2	3	3	3	4	2	3	2	3	2	3	2	3	2	3	2	3	3	2	3	2	0.666667	0.666667	0.666667	1
LTRL590_240009500.1	LtrL590_24:140,290..141,213(+)	307	924	ubiquitin carboxyl-terminal hydrolase, putative	#DIV/0!	0	#DIV/0!	0	0	2	0.666667	0.5	3	0.5	3	1	2	2.66667	1	2	1	2	1	2	1	2	2	0.5	3	1	2	1	2	1	2	1	2	1	2	1	2	2	1	2	2	0.666667	0.666667	0.666667	1
LTRL590_300015100.1	LtrL590_30:291,519..291,866(+)	115	348	pfkB family carbohydrate kinase, putative	#DIV/0!	1	#DIV/0!	1	#DIV/0!	0	0.666667	2	3	2	3	#DIV/0!	5	3.66667	1	2	1	2	1	2	1	2	2	2	3	1	2	1	2	1	2	1	2	1	2	1	2	2	1	2	3	1.66667	1.66667	1.66667	2
LTRL590_240030600.1	LtrL590_24:872,464..873,174(-)	236	711	hypothetical protein, conserved	1.66667	8	1.66667	8	2	9	8.33333	5	6	5	6	4	5	5.66667	1.66667	8	1.66667	8	1.66667	8	1.66667	8	8	5	6	1.66667	8	1.66667	8	1.66667	8	1.66667	8	1.66667	8	1.66667	8	6.80952	1.66667	8	-2.66667	-2.33333	-1.14286	-2.33333	-2.11905
LTRL590_320025200.1	LtrL590_32:726,462..727,136(-)	224	675	rab11B GTPase, putative	#DIV/0!	1	#DIV/0!	1	#DIV/0!	1	1	0.25	5	0.25	5	1	2	4	1	2	1	2	1	2	1	2	2	0.25	5	1	2	1	2	1	2	1	2	1	2	1	2	2.28571	#DIV/0!	1	3	2	1.71429	3	2.42857
LTRL590_180012300.1	LtrL590_18:297,176..297,427(+)	83	252	citrate synthase, putative	#DIV/0!	1	#DIV/0!	1	#DIV/0!	2	1.33333	#DIV/0!	0	#DIV/0!	0	#DIV/0!	2	0.666667	1	2	1	2	#DIV/0!	1	#DIV/0!	1	1.5	#DIV/0!	0	1	2	0	1	1	2	1	2	#DIV/0!	0	#DIV/0!	1	1	#DIV/0!	0	-0.666667	-0.833333	-0.333333	0.666667	-0.291667
LTRL590_320010000.1	LtrL590_32:181,958..183,529(-)	523	1572	Leucine Rich repeat, putative	1.66667	8	1.25	9	2	9	8.66667	6	7	7	8	2.5	7	7.33333	1.5	10	1.5	10	1.5	10	1.5	10	10	7	8	1.5	10	1.5	10	1.5	10	1.5	10	1.5	10	1.5	10	8.5	1.25	9	-1.33333	-2.66667	-1.16667	-1.66667	-1.70833
LTRL590_240007100.1	LtrL590_24:43,782..44,804(+)	340	1023	hypothetical protein, conserved	0	2	0	1	0	1	1.33333	2	6	2	6	4	5	5.66667	0	3	0	3	0	3	0	2	2.75	2	6	0	3	0	3	0	2	0	2	0	2	0	3	2.71429	0	2	4.33333	2.91667	2.95238	3.66667	3.46726
LTRL590_360084400.1	LtrL590_36:2,712,277..2,712,651(-)	124	375	cytochrome c oxidase subunit I	1	2	1	2	1	2	2	0.333333	4	0.333333	4	0.25	5	4.33333	1	2	1	2	1	2	1	4	2.5	0.333333	4	1	4	1	4	1	4	1	4	1	4	1	4	3.57143	2	3	2.33333	1.83333	0.761905	1.33333	1.56548
LTRL590_070017600.1	LtrL590_07:573,487..574,512(+)	341	1026	nucleolar RNA-binding protein, putative	0	3	0	1	0	1	1.66667	0	4	0	5	0	6	5	0	2	0	4	0	2	0	2	2.5	0	5	0	2	#DIV/0!	0	0	2	0	3	0	3	0	3	2.28571	0	1	3.33333	2.5	2.71429	4	3.1369
LTRL590_270025900.1	LtrL590_27:842,865..844,823(-)	652	1959	trypanothione synthetase, putative	1.33333	7	0.666667	5	1	8	6.66667	0.25	5	0.25	5	1	6	5.33333	0.5	6	0.5	6	0.5	6	0.75	7	6.25	0.25	5	0.5	6	0.5	6	0.5	6	0.5	6	0.5	6	0.5	6	5.07143	0.5	6	-1.33333	-0.916667	0.261905	-0.666667	-0.66369
LTRL590_080013000.1	LtrL590_08:314,873..316,003(-)	376	1131	mitochondrial DNA polymerase beta	0	8	0	8	0	7	7.66667	0	6	0	6	0	8	6.66667	0	8	0	8	0	8	0	8	8	0	6	0	8	0	8	0	8	0	8	0	8	0	8	6.57143	0	8	-1	-1.33333	0.0952381	-1.33333	-0.892857
LTRL590_340020400.1	LtrL590_34:585,614..587,098(-)	494	1485	BCS1 N terminal/ATPase family associated with various cellular activities (AAA), putative	0.8	9	0.5	9	0.5	9	9	0.4	7	0.4	7	0.5	6	6.66667	0.5	9	0.5	9	0.5	9	0.833333	11	9.5	0.4	7	0.714286	12	0.833333	11	0.714286	12	0.714286	12	0.833333	11	0.714286	12	9.38776	0.6	8	-2.33333	-2.83333	-2.72109	-1.33333	-2.30527
LTRL590_250030400.1	LtrL590_25:854,441..855,424(+)	327	984	palmitoyl acyltransferase 10, putative	0	4	0	3	0	4	3.66667	0.25	5	0.25	5	0.25	5	5	0.25	5	0.25	5	0.5	3	0.25	5	4.5	0.25	5	0.25	5	0.25	5	0.25	5	0.25	5	0.25	5	0.25	5	4.32143	0.5	3	1.33333	0.5	0.678571	2	1.12798
LTRL590_280012400.1	LtrL590_28:266,447..268,204(-)	585	1758	SNARE associated Golgi protein, putative	1.11111	19	1.22222	20	1	18	19	1.125	17	1.125	17	1.11111	19	17.6667	0.785714	25	0.785714	25	0.785714	25	0.4	7	20.5	1.125	17	0.785714	25	0.785714	25	0.785714	25	0.785714	25	0.785714	25	0.785714	25	20.398	0.666667	20	-1.33333	-2.83333	-2.73129	-2.33333	-2.30782
LTRL590_360044600.1	LtrL590_36:1,366,907..1,369,945(-)	1012	3039	2-oxoglutarate dehydrogenase subunit, putative	0.4	7	1	6	0.5	6	6.33333	0.5	9	0.5	9	0.444444	13	10.3333	0.6	8	0.6	8	0.6	8	0.6	8	8	0.5	9	0.6	8	0.6	8	0.8	9	0.6	8	0.6	8	0.6	8	7.11429	0.4	7	4	2.33333	3.21905	3.33333	3.22143
LTRL590_150018100.1	LtrL590_15:496,213..496,620(-)	136	408	hypothetical protein	1	6	2	3	#DIV/0!	1	3.33333	#DIV/0!	5	#DIV/0!	5	2	3	4.33333	3	4	3	4	2	3	4	5	4	#DIV/0!	5	3	4	3	4	3	4	3	4	1.5	5	3	4	4.14286	4	5	1	0.333333	0.190476	-0.666667	0.214286
LTRL590_270008900.1	LtrL590_27:109,621..111,813(+)	730	2193	Autophagy protein Apg9, putative	0.166667	7	0.166667	7	0.333333	8	7.33333	0.142857	8	0.142857	8	0.111111	10	8.66667	0.428571	10	2	3	0.428571	10	0.428571	10	8.25	0.142857	8	0.428571	10	0.428571	10	0.428571	10	0.428571	10	0.428571	10	0.428571	10	8.34694	0.5	9	1.33333	0.416667	0.319728	-0.333333	0.434099
LTRL590_320012800.1	LtrL590_32:257,988..258,338(+)	116	351	U6 snRNA-associated Sm-like protein LSm4p	0.2	6	0.166667	7	0.166667	7	6.66667	0.666667	5	0.666667	5	0.25	5	5	0.142857	8	0.142857	8	0.142857	8	0.142857	8	8	0.666667	5	0.142857	8	0.142857	8	0.142857	8	0.142857	8	0.142857	8	0.142857	8	6.44898	0.166667	7	-1.66667	-3	-1.44898	-2	-2.02891
LTRL590_240019200.1	LtrL590_24:480,488..481,216(+)	242	729	cyclophilin 8, putative	0.333333	4	0.5	3	1	4	3.66667	0	4	0	4	0	3	3.66667	0.5	3	0.5	3	0.5	3	0.5	3	3	0	4	0.5	3	0.5	3	0.5	3	0.5	3	0.5	3	0.5	3	2.78571	0	2	0	0.666667	0.880952	1.66667	0.803571
LTRL590_190012800.1	LtrL590_19:346,305..348,146(+)	613	1842	ABC transport system ATP-binding protein, putative	0	2	0	2	0	1	1.66667	#DIV/0!	2	#DIV/0!	2	#DIV/0!	0	1.33333	0	1	0	1	0	1	0	1	1	#DIV/0!	2	0	1	0	1	0	2	0	1	0	1	0	1	1	#DIV/0!	0	-0.333333	0.333333	0.333333	1.33333	0.416667
LTRL590_180007700.1	LtrL590_18:121,324..122,538(-)	404	1215	hypothetical protein, conserved	3	4	3	4	2.5	7	5	1.33333	14	1.33333	14	0.5	9	12.3333	2	6	2	6	2	6	1.5	5	5.75	1.33333	14	2	6	1.5	5	2	6	2	6	2	6	2	6	6.42857	4	5	7.33333	6.58333	5.90476	7.33333	6.78869
LTRL590_290031600.1	LtrL590_29:1,085,755..1,086,615(+)	285	858	kinesin, putative	0.333333	4	0	2	0	2	2.66667	0.8	9	0.8	9	0.333333	4	7.33333	0	3	0	3	0	3	0	4	3.25	0.8	9	0	4	0	4	0	4	0	4	0	4	0	4	4.14286	0	4	4.66667	4.08333	3.19048	3.33333	3.81845
LTRL590_350039000.1	LtrL590_35:1,261,299..1,261,865(-)	188	567	60S ribosomal subunit protein L31, putative	0	1	0	2	0	2	1.66667	0	1	0	1	0	1	1	0	1	0	1	0	1	#DIV/0!	0	0.75	0	1	0	2	0	1	0	1	0	1	#DIV/0!	0	0	2	1	#DIV/0!	0	-0.666667	0.25	0	1	0.145833
LTRL590_210022200.1	LtrL590_21:587,350..588,789(-)	479	1440	2-oxoisovalerate dehydrogenase alpha subunit, putative	1.33333	7	2	6	2	6	6.33333	1.33333	7	1.33333	7	1.5	5	6.33333	1.66667	8	1.66667	8	1.66667	8	1.66667	8	8	1.33333	7	1.66667	8	1.66667	8	1.66667	8	1.66667	8	1.66667	8	1.66667	8	6.95238	1.33333	7	0	-1.66667	-0.619048	-0.666667	-0.738095
LTRL590_350013500.1	LtrL590_35:305,626..306,903(+)	425	1278	hypothetical protein, conserved	1	4	1	4	2	3	3.66667	1	2	1	2	#DIV/0!	2	2	2	3	2	3	2	3	2	3	3	1	2	2	3	2	3	2	3	2	3	2	3	2	3	2.71429	1	2	-1.66667	-1	-0.714286	0	-0.845238
LTRL590_230014300.1	LtrL590_23:283,830..285,074(-)	414	1245	hypothetical protein, conserved	1	6	0.6	8	0.6	8	7.33333	2.33333	10	2.33333	10	2	12	10.6667	1	8	1	8	1.33333	7	1	2	6.25	2.33333	10	1.33333	7	1	8	1	8	1	8	1.25	9	1	8	7.28571	2	6	3.33333	4.41667	3.38095	4.66667	3.9494
LTRL590_360040000.1	LtrL590_36:1,245,757..1,246,428(-)	223	672	hypothetical protein, conserved	#DIV/0!	1	#DIV/0!	0	#DIV/0!	1	0.666667	1	4	1	4	1	4	4	1	2	1	2	1	2	1	2	2	1	4	1	2	1	2	1	2	1	2	1	2	1	2	2.14286	1	2	3.33333	2	1.85714	2	2.29762
LTRL590_130009300.1	LtrL590_13:150,714..151,310(+)	198	597	hypothetical protein, conserved	0	2	0.5	3	0	2	2.33333	0	1	0	1	0	1	1	0	1	0	1	0	1	0	1	1	0	1	0	1	0	1	0	1	0	1	0	1	0	1	0.857143	0	1	-1.33333	0	0.142857	0	-0.297619
LTRL590_150016100.1	LtrL590_15:417,855..418,793(-)	312	939	FAD-linked sulfhydryl oxidase, putative	1	6	1.5	5	1.5	5	5.33333	1.66667	8	1.66667	8	4	5	7	1.33333	7	1.33333	7	1.33333	7	1.33333	7	7	1.66667	8	1.33333	7	1.33333	7	1.33333	7	1.33333	7	1.33333	7	1.33333	7	6.33333	1	6	1.66667	0	0.666667	1	0.833333
LTRL590_300026100.1	LtrL590_30:729,901..730,842(+)	313	942	hypothetical protein, conserved	0.666667	5	0.333333	4	0.333333	4	4.33333	0	4	0	4	0	3	3.66667	0.2	6	0.2	6	0.2	6	0.2	6	6	0	4	0.2	6	0.2	6	0.2	6	0.2	6	0.2	6	0.2	6	4.88571	0.25	5	-0.666667	-2.33333	-1.21905	-1.33333	-1.3881
LTRL590_280030000.1	LtrL590_28:914,504..915,622(+)	372	1119	hd phosphohydrolase family protein	6	7	1.75	11	3	8	8.66667	1.5	5	1.5	5	3	4	4.66667	1.75	11	1.75	11	1.75	11	#DIV/0!	0	8.25	1.5	5	1.75	11	#DIV/0!	1	1.75	11	1.75	11	1.75	11	1.75	11	7.39286	2	9	-4	-3.58333	-2.72619	-4.33333	-3.66071
LTRL590_210024900.1	LtrL590_21:704,358..705,770(-)	470	1413	F-box-like, putative	0.5	6	0.4	7	0.75	7	6.66667	#DIV/0!	2	#DIV/0!	2	1	2	2	0.75	7	0.75	7	0.75	7	0.75	7	7	#DIV/0!	2	0.75	7	0.5	6	0.75	7	0.6	8	0.6	8	0.75	7	5.53571	0.75	7	-4.66667	-5	-3.53571	-5	-4.5506
LTRL590_120005400.1	LtrL590_12:6,599..8,002(+)	467	1404	Mitochondrial ribosomal death-associated protein 3, putative	0.2	6	0.2	6	0.166667	7	6.33333	0	8	0	8	0.5	3	6.33333	0.142857	8	0.142857	8	0.142857	8	0.142857	8	8	0	8	0.142857	8	0.142857	8	0.142857	8	0.142857	8	0.142857	8	0.142857	8	6.87755	0.166667	7	0	-1.66667	-0.544218	-0.666667	-0.719388
LTRL590_280029600.1	LtrL590_28:895,499..898,342(+)	947	2844	Mannosyl oligosaccharide glucosidase, putative	0.666667	10	0.8	9	0.8	9	9.33333	1	8	1	8	1.33333	7	7.66667	0.666667	10	0.666667	10	0.666667	10	0	1	7.75	1	8	0.666667	10	0.666667	10	0.666667	10	0.666667	10	0.666667	10	0.666667	10	8.38095	0.6	8	-1.66667	-0.0833333	-0.714286	-0.333333	-0.699405
LTRL590_360042800.1	LtrL590_36:1,320,828..1,321,355(-)	175	528	hypothetical protein	0.25	5	0.25	5	0.25	5	5	0	2	0	2	0	3	2.33333	0.5	6	0.5	6	0.5	6	0.5	6	6	0	2	0.5	6	0.5	6	0.5	6	0.5	6	0.5	6	0.5	6	4.64286	0.5	6	-2.66667	-3.66667	-2.30952	-3.66667	-3.07738
LTRL590_350034400.1	LtrL590_35:1,095,356..1,095,811(-)	151	456	hypothetical protein, conserved	0.25	5	0.25	5	0.25	5	5	#DIV/0!	0	#DIV/0!	0	#DIV/0!	0	0	0.25	5	0.25	5	0.25	5	0.25	5	5	#DIV/0!	0	0.25	5	0.25	5	0.25	5	0.25	5	0.25	5	0.25	5	3.60714	0.25	5	-5	-5	-3.60714	-5	-4.65179
LTRL590_180020300.1	LtrL590_18:691,881..692,435(+)	184	555	chaperone protein DNAj, putative	#DIV/0!	2	1.5	5	1	4	3.66667	0.5	3	0.5	3	0	1	2.33333	2	3	2	3	2	3	2	3	3	0.5	3	1	4	2	3	2	3	2	3	2	3	1	4	3.14286	#DIV/0!	2	-1.33333	-0.666667	-0.809524	0.333333	-0.619048
LTRL590_320012500.1	LtrL590_32:247,094..247,654(+)	186	561	hypothetical protein	1.5	5	3	4	1.5	5	4.66667	5	6	5	6	3	4	5.33333	3	4	3	4	3	4	3	4	4	5	6	3	4	3	4	3	4	3	4	3	4	3	4	4.14286	2	3	0.666667	1.33333	1.19048	2.33333	1.38095
LTRL590_260010800.1	LtrL590_26:157,726..158,724(-)	332	999	hypothetical protein, conserved	1	6	0.666667	5	0.666667	5	5.33333	0.666667	5	0.666667	5	0	5	5	0.666667	5	0.666667	5	0.666667	5	#DIV/0!	0	3.75	0.666667	5	0.666667	5	0.666667	5	0.666667	5	0.666667	5	0.666667	5	0.666667	5	4.38095	0.666667	5	-0.333333	1.25	0.619048	0	0.383929
LTRL590_150010800.1	LtrL590_15:217,420..219,246(+)	608	1827	hypothetical protein, conserved	0	3	#DIV/0!	0	#DIV/0!	1	1.33333	#DIV/0!	0	#DIV/0!	0	0	1	0.333333	0.5	3	#DIV/0!	0	#DIV/0!	0	#DIV/0!	0	0.75	#DIV/0!	0	0	4	#DIV/0!	0	0	2	0	4	#DIV/0!	0	0.5	3	1.57143	#DIV/0!	0	-1	-0.416667	-1.2381	0.333333	-0.580357
LTRL590_030006900.1	LtrL590_03:51,777..52,916(+)	379	1140	protein kinase, putative	0	6	0	5	0	6	5.66667	0	1	0	1	0	2	1.33333	0	6	0	6	0	6	0	6	6	0	1	0	6	0	6	0	6	0	6	0	6	0	6	4.42857	0	5	-4.33333	-4.66667	-3.09524	-3.66667	-3.94048
LTRL590_240028900.1	LtrL590_24:824,552..825,532(-)	326	981	Ubiquitin-conjugating enzyme, putative	1.33333	7	1.33333	7	1	8	7.33333	3	4	3	4	#DIV/0!	2	3.33333	1.66667	8	1.66667	8	1.66667	8	1.66667	8	8	3	4	1.66667	8	1.66667	8	1.66667	8	1.66667	8	1.66667	8	1.66667	8	6.52381	1.66667	8	-4	-4.66667	-3.19048	-4.66667	-4.13095
LTRL590_230009500.1	LtrL590_23:137,139..137,495(+)	118	357	cytochrome c oxidase subunit 10, putative	0	2	0	2	0	3	2.33333	0.25	5	0.25	5	0.333333	4	4.66667	0.333333	4	0.333333	4	0.333333	4	1	2	3.5	0.25	5	0.333333	4	0.333333	4	1	2	1	2	1	2	0.333333	4	3.14286	0.333333	4	2.33333	1.16667	1.52381	0.666667	1.42262
LTRL590_230005800.1	LtrL590_23:16,414..17,673(+)	419	1260	hypothetical protein, conserved	1	2	1	2	2	3	2.33333	0.166667	7	0.166667	7	0.4	7	7	1	4	1	4	1	4	1	2	3.5	0.166667	7	1	4	1	4	1	2	1	2	1	2	1	4	3.42857	1	4	4.66667	3.5	3.57143	3	3.68452
LTRL590_360059800.1	LtrL590_36:1,897,700..1,899,118(+)	472	1419	hypothetical protein, conserved	0.6	8	0.75	7	0.666667	10	8.33333	1.16667	13	1.16667	13	0.857143	13	13	1	10	1	10	1	10	1	10	10	1.16667	13	1	10	1	10	1	10	1.2	11	1.2	11	1	10	9.42857	1.25	9	4.66667	3	3.57143	4	3.80952
LTRL590_130013500.1	LtrL590_13:306,493..307,320(-)	275	828	glycosyltransferase family-like protein	2	3	1	2	0.5	3	2.66667	#DIV/0!	0	#DIV/0!	0	#DIV/0!	1	0.333333	1	2	1	2	1	2	1	2	2	#DIV/0!	0	1	2	1	2	1	2	1	2	1	2	1	2	1.57143	0	1	-2.33333	-1.66667	-1.2381	-0.666667	-1.47619
LTRL590_180020100.1	LtrL590_18:688,711..689,625(+)	304	915	NADH-ubiquinone oxidoreductase complex I subunit, putative	0	2	0	2	0	3	2.33333	2	3	2	3	1	2	2.66667	1	4	1	4	1	4	1	4	4	2	3	1	4	1	4	1	4	1	4	1	4	1	4	3.42857	2	3	0.333333	-1.33333	-0.761905	-0.333333	-0.52381
LTRL590_230021200.1	LtrL590_23:572,737..573,699(+)	320	963	sir2-family protein-like protein	1	4	3	4	4	5	4.33333	0.5	6	0.5	6	0.75	7	6.33333	2	6	2	6	2	6	2	6	6	0.5	6	2	6	2	6	2	6	2	6	2	6	2	6	5.42857	1.5	5	2	0.333333	0.904762	1.33333	1.14286
LTRL590_210008900.1	LtrL590_21:111,316..112,719(+)	467	1404	mitochondrial processing peptidase alpha subunit, putative	1	4	1	4	2	3	3.66667	#DIV/0!	1	#DIV/0!	1	0.5	6	2.66667	2	3	2	3	2	3	2	3	3	#DIV/0!	1	2	3	2	3	2	3	2	3	2	3	2	3	2.57143	#DIV/0!	2	-1	-0.333333	0.0952381	0.666667	-0.142857
LTRL590_100006600.1	LtrL590_10:66,717..67,520(-)	267	804	hypothetical protein, conserved	1	4	1	4	2	3	3.66667	1	2	1	2	1	2	2	0.5	3	0.5	3	0.5	3	1	6	3.75	1	2	1	6	1	6	1	6	1	6	1	6	1	6	4.71429	0.5	3	-1.66667	-1.75	-2.71429	-1	-1.78274
LTRL590_250014600.1	LtrL590_25:316,298..316,870(+)	190	573	hypothetical protein	2	3	#DIV/0!	4	2	3	3.33333	0.25	5	0.25	5	0.75	7	5.66667	#DIV/0!	2	#DIV/0!	2	#DIV/0!	2	#DIV/0!	2	2	0.25	5	#DIV/0!	2	#DIV/0!	2	0.666667	5	0.666667	5	0.666667	5	#DIV/0!	2	3.09524	#DIV/0!	2	2.33333	3.66667	2.57143	3.66667	3.05952
LTRL590_220011700.1	LtrL590_22:257,671..258,144(-)	157	474	prefoldin 5-like protein	0	2	0	2	0	2	2	0	1	0	1	0	1	1	#DIV/0!	0	#DIV/0!	0	#DIV/0!	0	0	2	0.5	0	1	0	2	0	2	0	2	0	2	0	2	0	2	1.57143	0	2	-1	0.5	-0.571429	-1	-0.517857
LTRL590_350056800.1	LtrL590_35:1,850,000..1,850,272(+)	90	273	hypothetical protein	0	1	1	2	1	2	1.66667	1	4	1	4	1.5	5	4.33333	0	1	0	1	#DIV/0!	1	1	2	1.25	1	4	0	1	#DIV/0!	0	0	1	0	1	#DIV/0!	0	0	1	1	#DIV/0!	0	2.66667	3.08333	3.33333	4.33333	3.35417
LTRL590_350033200.1	LtrL590_35:1,035,998..1,037,860(-)	620	1863	hypothetical protein, conserved	0.5	9	0.75	7	0.5	6	7.33333	0.666667	10	0.666667	10	1.2	11	10.3333	0.5	6	0.5	6	0.5	6	0.5	6	6	0.666667	10	0.5	6	0.5	6	0.5	6	0.5	6	0.5	6	0.5	6	5.78571	0.5	6	3	4.33333	4.54762	4.33333	4.05357
LTRL590_280021000.1	LtrL590_28:556,218..558,395(+)	725	2178	hypothetical protein, conserved	0.75	14	0.625	13	0.75	14	13.6667	0.375	11	0.375	11	0.833333	11	11	0.7	17	0.7	17	0.7	17	0	2	13.25	0.375	11	0.6	16	0.6	16	0.6	16	0.6	16	0.6	16	0.6	16	13.0857	0.714286	12	-2.66667	-2.25	-2.08571	-1	-2.0006
LTRL590_000013300.1	LTRL590_SCAF000062:37,153..37,404(-)	83	252	hypothetical protein, conserved	1	2	0	1	0	1	1.33333	#DIV/0!	3	#DIV/0!	3	#DIV/0!	2	2.66667	2	3	#DIV/0!	2	2	3	2	3	2.75	#DIV/0!	3	2	3	2	3	2	3	2	3	2	3	2	3	2.85714	#DIV/0!	2	1.33333	-0.0833333	-0.190476	0.666667	0.431548
LTRL590_300016600.1	LtrL590_30:347,488..348,240(+)	250	753	hypothetical protein, conserved	2	3	1	4	2	3	3.33333	4	5	4	5	2	3	4.33333	1.5	5	1.5	5	1.5	5	1.5	5	5	4	5	1.5	5	1.5	5	1.5	5	1.5	5	1.5	5	1.5	5	4.5	1	4	1	-0.666667	-0.166667	0.333333	0.125
LTRL590_240029200.1	LtrL590_24:834,191..835,195(-)	334	1005	Glycerophosphoryl diester phosphodiesterase family, putative	#DIV/0!	5	5	6	5	6	5.66667	#DIV/0!	0	#DIV/0!	0	#DIV/0!	1	0.333333	2.5	7	2.5	7	2.5	7	2.5	7	7	#DIV/0!	0	2.5	7	2.5	7	2.5	7	2.5	7	2.5	7	2.5	7	5.35714	2	6	-5.33333	-6.66667	-5.02381	-5.66667	-5.67262
LTRL590_280020100.1	LtrL590_28:518,878..519,723(+)	281	846	haloacid dehalogenase-like hydrolase, putative	0.75	7	0.8	9	0.75	7	7.66667	1.5	10	1.5	10	0.75	7	9	1	8	1	8	1	8	#DIV/0!	0	6	1.5	10	1	8	1	8	1	8	1	8	1	8	1	8	7.28571	0.75	7	1.33333	3	1.71429	2	2.0119
LTRL590_220021200.1	LtrL590_22:637,902..639,059(+)	385	1158	CobW/HypB/UreG, nucleotide-binding domain containing protein, putative	0.75	7	1	6	0.75	7	6.66667	0	2	0	2	2	3	2.33333	0.75	7	0.75	7	0.75	7	0.75	7	7	0	2	0.75	7	0.75	7	0.75	7	0.75	7	0.75	7	0.75	7	5.39286	1	6	-4.33333	-4.66667	-3.05952	-3.66667	-3.93155
LTRL590_090014600.1	LtrL590_09:349,107..349,667(-)	186	561	ef-hand protein 5, putative	1	2	1	2	1	2	2	0	1	0	1	#DIV/0!	0	0.666667	#DIV/0!	0	#DIV/0!	0	#DIV/0!	0	1	2	0.5	0	1	1	2	1	2	1	2	1	2	1	2	1	2	1.71429	1	2	-1.33333	0.166667	-1.04762	-1.33333	-0.886905
LTRL590_360012900.1	LtrL590_36:215,639..216,934(+)	431	1296	mitogen-activated protein kinase	0	3	0	3	0	3	3	0	4	0	4	0.166667	7	5	0	5	0	5	0	3	0	5	4.5	0	4	0	5	0	5	0	5	0	5	0	2	0	5	3.71429	0	3	2	0.5	1.28571	2	1.44643
LTRL590_360010600.1	LtrL590_36:140,849..141,745(-)	298	897	protein phosphatase 2C-like protein	#DIV/0!	0	0	1	0	1	0.666667	0	1	0	1	0	1	1	0	2	0	2	0	2	0	2	2	0	1	#DIV/0!	0	0	2	0	2	0	2	0	1	#DIV/0!	0	0.857143	0	2	0.333333	-1	0.142857	-1	-0.380952
LTRL590_280008500.1	LtrL590_28:116,245..116,859(-)	204	615	hypothetical protein, conserved	0.25	5	0.25	5	0.25	5	5	#DIV/0!	1	#DIV/0!	1	4	5	2.33333	0.25	5	0.25	5	0.25	5	#DIV/0!	0	3.75	#DIV/0!	1	0.25	5	0.25	5	0.25	5	0.25	5	0.25	5	0.25	5	3.75	0.25	5	-2.66667	-1.41667	-1.41667	-2.66667	-2.04167
LTRL590_160016200.1	LtrL590_16:407,207..407,395(-)	62	189	hypothetical protein, conserved	#DIV/0!	3	#DIV/0!	3	3	4	3.33333	1	2	1	2	#DIV/0!	1	1.66667	5	6	5	6	4	5	2	3	5	1	2	5	6	5	6	5	6	5	6	#DIV/0!	1	5	6	4.57143	3	4	-1.66667	-3.33333	-2.90476	-2.33333	-2.55952
LTRL590_360049400.1	LtrL590_36:1,508,253..1,509,566(+)	437	1314	S-adenosylhomocysteine hydrolase	0	3	0	2	0	2	2.33333	0	5	0	5	0	4	4.66667	0	4	0	4	0	4	0	4	4	0	5	0	4	0	4	0	4	0	4	0	4	0	4	3.57143	0	3	2.33333	0.666667	1.09524	1.66667	1.44048
LTRL590_190010900.1	LtrL590_19:275,170..275,451(+)	93	282	hypothetical protein, conserved	1	2	0	1	0	1	1.33333	0	2	0	2	0	3	2.33333	0	3	0	3	0	3	0	3	3	0	2	0	3	0.333333	4	0	3	0	3	0	3	0	3	2.57143	0	2	1	-0.666667	-0.238095	0.333333	0.107143
LTRL590_160008900.1	LtrL590_16:127,714..127,896(-)	60	183	hypothetical protein	#DIV/0!	0	#DIV/0!	0	#DIV/0!	0	0	4	5	4	5	2	3	4.33333	0	1	0	1	0	1	0	1	1	4	5	0	1	0	1	0	1	0	1	0	1	0	1	1.42857	#DIV/0!	0	4.33333	3.33333	2.90476	4.33333	3.72619
LTRL590_000022400.1	LTRL590_SCAF000112:77,809..78,474(+)	221	666	MORN repeat, putative	0.333333	4	0.333333	4	0.333333	4	4	#DIV/0!	3	#DIV/0!	3	#DIV/0!	3	3	0.5	3	0.5	3	0.5	3	#DIV/0!	2	2.75	#DIV/0!	3	1.5	5	1.5	5	1.5	5	1.5	5	1.5	5	1.5	5	4.21429	0.5	3	-1	0.25	-1.21429	0	-0.491071
LTRL590_280010700.1	LtrL590_28:202,218..203,078(-)	286	861	Modifier of rudimentary (Mod(r)) protein, putative	1	6	0.75	7	1.5	5	6	#DIV/0!	0	#DIV/0!	0	0	1	0.333333	1	6	1	6	1	6	#DIV/0!	0	4.5	#DIV/0!	0	1	6	1	6	1	6	1	6	1	6	1	6	4.42857	0.666667	5	-5.66667	-4.16667	-4.09524	-4.66667	-4.64881
LTRL590_280012100.1	LtrL590_28:258,529..259,434(-)	301	906	serine/threonine protein phosphatase catalytic subunit, putative	0	5	0	5	0	6	5.33333	0	5	0	5	0	3	4.33333	0	7	0	7	0	7	0	2	5.75	0	5	0	7	0	7	0	7	0	7	0	7	0	7	5.71429	0	7	-1	-1.41667	-1.38095	-2.66667	-1.61607
LTRL590_300031200.1	LtrL590_30:931,724..932,332(-)	202	609	hypothetical protein, conserved	#DIV/0!	0	#DIV/0!	0	#DIV/0!	0	0	0	3	0	3	0	2	2.66667	0	2	0	2	0	2	0	1	1.75	0	3	0	1	0	1	0	1	0	1	0	1	0	1	1.14286	0	1	2.66667	0.916667	1.52381	1.66667	1.69345
LTRL590_000009400.1	LTRL590_SCAF000036:33,974..34,336(-)	120	363	hypothetical protein, conserved	0	2	0	2	0	2	2	0	1	0	1	2	3	1.66667	#DIV/0!	0	#DIV/0!	0	#DIV/0!	0	0	1	0.25	0	1	0	1	0	1	0	1	0	1	0	1	0	1	0.857143	0	1	-0.333333	1.41667	0.809524	0.666667	0.639881
LTRL590_280010500.1	LtrL590_28:193,417..194,550(-)	377	1134	DNA repair protein RAD51, putative	0	6	0	6	0	5	5.66667	0.5	3	0.5	3	1	2	2.66667	0	6	0	6	0	6	#DIV/0!	0	4.5	0.5	3	0	5	0.166667	7	0	6	0	6	0	6	0	6	4.71429	0	6	-3	-1.83333	-2.04762	-3.33333	-2.55357
LTRL590_250017400.1	LtrL590_25:422,897..424,138(-)	413	1242	MGT2 magnesium transporter	0	2	0.5	3	0	2	2.33333	0	2	0.5	3	0	3	2.66667	0	4	0	4	0	2	0	4	3.5	0.5	3	0	4	0	4	0	4	0	4	0	4	0	4	3.28571	0	2	0.333333	-0.833333	-0.619048	0.666667	-0.113095
LTRL590_250013100.1	LtrL590_25:260,756..261,220(-)	154	465	Thioredoxin, putative	2	6	2	3	3	4	4.33333	#DIV/0!	2	#DIV/0!	2	#DIV/0!	2	2	2	3	2	3	2	3	2	3	3	#DIV/0!	2	2	3	2	3	2	3	2	3	2	3	2	3	2.71429	2	3	-2.33333	-1	-0.714286	-1	-1.2619
LTRL590_050016900.1	LtrL590_05:447,931..449,121(-)	396	1191	protein phosphatase type 1 regulator-like protein	2	3	3	4	3	4	3.66667	0.25	5	0.25	5	0.5	6	5.33333	0.5	6	0.5	6	0.5	6	2	3	5.25	0.25	5	0.5	6	0.5	6	0.5	6	0.5	6	0.5	6	0.5	6	5.07143	0.666667	5	1.66667	0.0833333	0.261905	0.333333	0.58631
LTRL590_330007900.1	LtrL590_33:76,804..77,820(-)	338	1017	hypothetical protein, conserved	0.5	3	0	1	0.333333	4	2.66667	0.6	8	0.6	8	0.666667	5	7	1	4	1	4	1	4	1	4	4	0.6	8	1	4	1	4	1	4	1	4	1	4	1	4	4.14286	0.5	3	4.33333	3	2.85714	4	3.54762
LTRL590_300026900.1	LtrL590_30:746,878..747,960(-)	360	1083	Oligomerisation domain containing protein, putative	0.25	5	0.25	5	0.25	5	5	1.5	5	1.5	5	2	3	4.33333	0.5	6	0.5	6	1	8	0.5	6	6.5	1.5	5	0.5	6	0.5	6	0.5	6	0.5	6	0.5	6	0.5	6	5.07143	0.5	6	-0.666667	-2.16667	-0.738095	-1.66667	-1.30952
LTRL590_250029900.1	LtrL590_25:844,088..844,600(+)	170	513	hypothetical protein, conserved	1	2	1	2	0.5	3	2.33333	#DIV/0!	3	#DIV/0!	3	#DIV/0!	4	3.33333	3	4	3	4	#DIV/0!	2	3	4	3.5	#DIV/0!	3	3	4	3	4	3	4	3	4	3	4	3	4	3.71429	3	4	1	-0.166667	-0.380952	-0.666667	-0.0535714
LTRL590_250028900.1	LtrL590_25:823,692..824,906(-)	404	1215	BRO1-like domain containing protein, putative	0	5	0	4	0	5	4.66667	0.125	9	0.125	9	0.333333	8	8.66667	0.166667	7	0.166667	7	0.5	3	0.166667	7	6	0.125	9	0.166667	7	0.166667	7	0.166667	7	0.166667	7	0.166667	7	0.166667	7	6.30952	0.2	6	4	2.66667	2.35714	2.66667	2.92262
LTRL590_280031600.1	LtrL590_28:977,147..978,208(+)	353	1062	tRNA methyltransferase complex GCD14 subunit, putative	2	3	2	3	3	4	3.33333	1	2	2	3	0.5	3	2.66667	3	4	3	4	3	4	#DIV/0!	0	3	2	3	3	4	3	4	3	4	3	4	3	4	3	4	3.71429	1	2	-0.666667	-0.333333	-1.04762	0.666667	-0.345238
LTRL590_020006400.1	LtrL590_02:70,515..70,897(-)	126	381	hypothetical protein	#DIV/0!	2	#DIV/0!	2	#DIV/0!	3	2.33333	0	1	#DIV/0!	0	0	1	0.666667	1	2	1	2	1	2	1	2	2	#DIV/0!	0	2	6	1	2	1	2	2	6	1	2	1	2	2.71429	0	1	-1.66667	-1.33333	-2.04762	-0.333333	-1.34524
LTRL590_270012800.1	LtrL590_27:296,439..297,044(+)	201	606	NADH-ubiquinone oxidoreductase 20 kDa subunit, mitochondrial precursor	0	4	0	4	0	5	4.33333	0	2	0	2	0	1	1.66667	0	6	0	6	0	6	0	6	6	0	2	0	6	0	6	0	6	0	6	0	6	0	6	4.57143	0	5	-2.66667	-4.33333	-2.90476	-3.33333	-3.30952
LTRL590_280020200.1	LtrL590_28:521,436..522,644(+)	402	1209	haloacid dehalogenase-like hydrolase-like protein	0	2	0	2	0	2	2	0.25	5	0.25	5	0.25	5	5	0.333333	4	0.333333	4	0.333333	4	1	2	3.5	0.25	5	0.333333	4	0.333333	4	0.333333	4	0.333333	4	0.333333	4	0.333333	4	3.61905	0.5	3	3	1.5	1.38095	2	1.97024
LTRL590_150007600.1	LtrL590_15:89,763..91,523(+)	586	1761	lysyl-tRNA synthetase, putative	1	10	0.6	8	0.6	8	8.66667	0.375	11	0.375	11	0.75	7	9.66667	0.428571	10	0.428571	10	0.428571	10	0.428571	10	10	0.375	11	0.428571	10	0.428571	10	0.428571	10	0.428571	10	0.428571	10	0.428571	10	8.77551	0.428571	10	1	-0.333333	0.891156	-0.333333	0.306122
LTRL590_260012800.1	LtrL590_26:234,916..235,482(-)	165	498	type II (glutathione peroxidase-like) tryparedoxin peroxidase	1	4	1.5	5	3	4	4.33333	2.5	7	1.5	5	3	8	6.66667	#DIV/0!	3	2	3	4	5	3	4	3.75	1.5	5	2	6	2	6	4	5	2	6	3	4	2.5	7	5.42857	1	4	2.33333	2.91667	1.2381	2.66667	2.28869
LTRL590_320028000.1	LtrL590_32:825,639..826,652(-)	337	1014	eRF1 methyltransferase catalytic subunit, putative	0.666667	5	0.666667	5	0.666667	5	5	3	8	3	8	1.33333	7	7.66667	1.33333	7	1.33333	7	1.33333	7	#DIV/0!	3	6	3	8	1.33333	7	1	8	1.33333	7	1.33333	7	1.33333	7	1.33333	7	6.47619	0.666667	5	2.66667	1.66667	1.19048	2.66667	2.04762
LTRL590_350026500.1	LtrL590_35:780,813..781,430(+)	205	618	R-SNARE protein, putative	1	6	0.333333	4	0.666667	5	5	0	2	0	2	0	1	1.66667	0.333333	4	0.333333	4	0.333333	4	0.333333	4	4	0	2	0.333333	4	0.333333	4	0.333333	4	0.333333	4	0.333333	4	0.333333	4	3.19048	0.333333	4	-3.33333	-2.33333	-1.52381	-2.33333	-2.38095
LTRL590_340019500.1	LtrL590_34:551,643..551,921(-)	92	279	hypothetical protein, conserved	#DIV/0!	0	#DIV/0!	0	#DIV/0!	0	0	#DIV/0!	0	#DIV/0!	0	1	2	0.666667	#DIV/0!	0	#DIV/0!	0	#DIV/0!	0	1	2	0.5	#DIV/0!	0	1	2	1	2	1	2	1	2	1	2	1	2	1.57143	#DIV/0!	0	0.666667	0.166667	-0.904762	0.666667	0.14881
LTRL590_130019200.1	LtrL590_13:505,444..505,776(-)	110	333	EF hand-like protein	0.75	7	0.75	7	1	8	7.33333	4	5	4	5	5	6	5.33333	0.75	7	0.75	7	0.75	7	0.75	7	7	4	5	0.75	7	0.75	7	0.75	7	0.75	7	0.75	7	0.75	7	5.82143	0.5	6	-2	-1.66667	-0.488095	-0.666667	-1.20536
LTRL590_280005400.1	LtrL590_28:11,464..13,002(+)	512	1539	dynein regulatory complex subunit, putative	0.25	5	0.5	6	0.5	6	5.66667	0.25	5	0.25	5	0.25	5	5	0.25	5	0.25	5	0.25	5	#DIV/0!	1	4	0.25	5	0.25	5	0.25	5	0.25	5	0.25	5	0.25	5	0.25	5	4.32143	0.25	5	-0.666667	1	0.678571	0	0.252976
LTRL590_270007000.1	LtrL590_27:45,761..46,477(-)	238	717	proteasome alpha 7 subunit, putative	0	2	0	3	0	2	2.33333	0	2	0	2	0	3	2.33333	0	4	0	3	0	4	0	4	3.75	0	2	0	4	0	4	0	4	0	4	0	4	0	4	3.14286	0	4	0	-1.41667	-0.809524	-1.66667	-0.973214
LTRL590_260024800.1	LtrL590_26:726,323..727,390(+)	355	1068	Thioesterase-like superfamily, putative	#DIV/0!	1	#DIV/0!	0	#DIV/0!	0	0.333333	2	3	2	3	2	3	3	1	2	0	1	#DIV/0!	0	1	2	1.25	2	3	0	1	1	2	1	2	1	2	#DIV/0!	0	1	2	1.57143	#DIV/0!	0	2.66667	1.75	1.42857	3	2.21131
LTRL590_260006800.1	LtrL590_26:47,448..48,392(-)	314	945	Uncharacterised conserved protein (DUF2305), putative	0.8	9	0.5	6	0.5	6	7	3	4	3	4	3	4	4	0.8	9	0.8	9	0.8	9	2	3	7.5	3	4	0.8	9	0.8	9	0.8	9	0.5	6	0.5	6	0.8	9	6.25714	1	8	-3	-3.5	-2.25714	-4	-3.18929
LTRL590_340025500.1	LtrL590_34:793,257..793,475(-)	72	219	hypothetical protein, conserved	2	3	1	2	2	3	2.66667	2	3	2	3	#DIV/0!	5	3.66667	1	2	1	2	1	2	2	3	2.25	2	3	2	3	2	3	2	3	2	3	#DIV/0!	0	2	3	2.42857	0	1	1	1.41667	1.2381	2.66667	1.58036
LTRL590_280007900.1	LtrL590_28:91,493..92,251(+)	252	759	hypothetical protein, conserved	0.5	6	0.333333	8	0.5	6	6.66667	0.333333	4	0.666667	5	0.5	3	4	0.333333	8	0.333333	8	0.333333	8	#DIV/0!	0	6	0.666667	5	0.333333	8	0.333333	8	0.333333	8	0.333333	8	0.333333	8	0.333333	8	6.47619	0.25	5	-2.66667	-2	-2.47619	-1	-2.03571
LTRL590_130014700.1	LtrL590_13:345,117..345,866(-)	249	750	hypothetical protein	2	6	2.5	7	2	6	6.33333	2	6	2	6	#DIV/0!	3	5	1.5	5	1.5	5	1.5	5	1.5	5	5	2	6	1.5	5	1.5	5	1.5	5	1.5	5	1.5	5	1.5	5	4.64286	1.5	5	-1.33333	0	0.357143	0	-0.244048
LTRL590_360015000.1	LtrL590_36:348,612..348,890(+)	92	279	hypothetical protein	#DIV/0!	1	1	2	1	2	1.66667	#DIV/0!	2	#DIV/0!	2	#DIV/0!	2	2	2	3	2	3	#DIV/0!	1	2	3	2.5	#DIV/0!	2	2	3	2	3	2	3	2	3	1	2	2	3	2.57143	#DIV/0!	1	0.333333	-0.5	-0.571429	1	0.0654762
LTRL590_090010700.1	LtrL590_09:218,723..219,511(+)	262	789	Histidine phosphatase superfamily (branch 1), putative	0	1	#DIV/0!	0	#DIV/0!	1	0.666667	0	2	0	2	0	2	2	#DIV/0!	0	#DIV/0!	0	#DIV/0!	0	0	2	0.5	0	2	0	2	0	2	0	2	0	2	0	2	0	2	1.71429	0	2	1.33333	1.5	0.285714	0	0.779762
LTRL590_250018200.1	LtrL590_25:462,520..463,260(-)	246	741	alpha-tubulin N-acetyltransferase, putative	#DIV/0!	0	#DIV/0!	1	#DIV/0!	0	0.333333	0	2	0	2	0.333333	4	2.66667	0	2	0	2	0	2	0	2	2	0	2	0	2	0	2	0	2	0	2	0	2	0	2	1.71429	0	1	2.33333	0.666667	0.952381	1.66667	1.40476
LTRL590_070010800.1	LtrL590_07:228,101..228,580(+)	159	480	hypothetical protein, conserved	#DIV/0!	1	#DIV/0!	1	#DIV/0!	2	1.33333	1	2	1	2	1	2	2	2	3	2	3	2	3	2	3	3	1	2	2	3	2	3	2	3	2	3	2	3	2	3	2.71429	1	2	0.666667	-1	-0.714286	0	-0.261905
LTRL590_260007200.1	LtrL590_26:57,314..59,326(-)	670	2013	hypothetical protein, conserved	1.66667	8	1	8	1.25	9	8.33333	0.571429	11	0.571429	11	0	7	9.66667	1	10	1	10	1	10	0.333333	4	8.5	0.571429	11	1	10	1.2	11	1	10	1	10	1	10	1	10	9	1	10	1.33333	1.16667	0.666667	-0.333333	0.708333
LTRL590_130006100.1	LtrL590_13:33,570..34,040(-)	156	471	hypothetical protein, conserved	0.5	6	0.5	6	0.5	6	6	0	1	0	1	#DIV/0!	1	1	0.5	6	0.5	6	0.5	6	0.5	6	6	0	1	0.5	6	0.5	6	0.5	6	0.5	6	0.5	6	0.5	6	4.5	0.5	6	-5	-5	-3.5	-5	-4.625
LTRL590_320015300.1	LtrL590_32:345,517..346,650(+)	377	1134	Alpha/beta hydrolase family, putative	1	6	2	6	2	6	6	4	5	4	5	2.5	7	5.66667	1	6	1	6	1	6	1.66667	8	6.5	4	5	1.66667	8	1.66667	8	1.66667	8	1.66667	8	1.66667	8	1.66667	8	6.66667	0.666667	5	-0.333333	-0.833333	-1	0.666667	-0.375
LTRL590_250029600.1	LtrL590_25:837,131..838,444(+)	437	1314	hypothetical protein, conserved	2.5	7	2	6	2	6	6.33333	0.4	7	0.4	7	0	5	6.33333	1	8	1	8	0	2	1	8	6.5	0.4	7	1	8	1	8	1	8	1	8	1	8	1	8	6.85714	1	8	0	-0.166667	-0.52381	-1.66667	-0.589286
LTRL590_360042100.1	LtrL590_36:1,302,556..1,303,482(-)	308	927	hypothetical protein, conserved	#DIV/0!	2	#DIV/0!	1	1	2	1.66667	1.33333	7	1.33333	7	2	6	6.66667	0.5	3	0.5	3	0.5	3	0.5	3	3	1.33333	7	0.5	3	0.5	3	0.5	3	0.5	3	0.5	3	0.5	3	3.21429	0	2	5	3.66667	3.45238	4.66667	4.19643
LTRL590_280014500.1	LtrL590_28:325,555..327,954(+)	799	2400	ribonucleoside-diphosphate reductase large chain, putative	0.375	11	0.333333	12	0.375	11	11.3333	0.25	5	0.25	5	0.25	5	5	0.363636	15	0.363636	15	0.363636	15	0.5	3	12	0.25	5	0.363636	15	0.363636	15	0.363636	15	0.363636	15	0.363636	15	0.363636	15	11.4805	0.444444	13	-6.33333	-7	-6.48052	-8	-6.95346
LTRL590_330005800.1	LtrL590_33:16,887..17,429(-)	180	543	hypothetical protein, conserved	#DIV/0!	1	#DIV/0!	1	1	2	1.33333	3	4	3	4	3	4	4	2	3	2	3	2	3	1	2	2.75	3	4	2	3	2	3	2	3	2	3	2	3	2	3	3	1	2	2.66667	1.25	1	2	1.72917
LTRL590_050005700.1	LtrL590_05:22,793..23,398(+)	201	606	Rrp15p, putative	#DIV/0!	0	#DIV/0!	0	0	1	0.333333	0	3	0	3	0	2	2.66667	1	2	1	2	1	2	#DIV/0!	1	1.75	0	3	1	2	1	2	1	2	1	2	1	2	1	2	2	#DIV/0!	1	2.33333	0.916667	0.666667	1.66667	1.39583
LTRL590_270007500.1	LtrL590_27:60,095..60,334(-)	79	240	hypothetical protein	#DIV/0!	2	#DIV/0!	1	#DIV/0!	1	1.33333	0.5	3	0.5	3	0.5	3	3	2	3	#DIV/0!	1	2	3	2	3	2.5	0.5	3	2	3	2	3	2	3	2	3	2	3	2	3	2.85714	2	3	1.66667	0.5	0.142857	0	0.577381
LTRL590_270029500.1	LtrL590_27:982,559..983,599(-)	346	1041	ribosomal protein L11, putative	1	4	0.666667	5	0.666667	5	4.66667	0.5	3	0.5	3	1	2	2.66667	0.5	6	0.5	6	0.5	6	0.5	6	6	0.5	3	0.5	6	0.5	6	0.5	6	0.333333	4	0.333333	4	0.5	6	4.21429	0.666667	5	-2	-3.33333	-1.54762	-2.33333	-2.30357
LTRL590_250021300.1	LtrL590_25:572,676..573,464(-)	262	789	hypothetical protein, conserved	0.2	6	0.4	7	0.2	6	6.33333	0.333333	4	0.333333	4	0.333333	4	4	0.142857	8	0.142857	8	0.25	5	0.2	6	6.75	0.333333	4	0.142857	8	0.142857	8	0.142857	8	0.142857	8	0.142857	8	0.142857	8	6.30612	0.25	5	-2.33333	-2.75	-2.30612	-1	-2.09736
LTRL590_350032100.1	LtrL590_35:996,152..998,179(-)	675	2028	hypothetical protein, conserved	2.33333	10	2.33333	10	2.33333	10	10	5	6	5	6	0.666667	5	5.66667	2.33333	10	2.33333	10	2.33333	10	2.33333	10	10	5	6	2.33333	10	2.66667	11	2.33333	10	2.33333	10	2.33333	10	2.33333	10	8.47619	3.5	9	-4.33333	-4.33333	-2.80952	-3.33333	-3.70238
LTRL590_140014900.1	LtrL590_14:397,024..397,371(-)	115	348	small myristoylated protein-3, putative	0	2	0	1	0	2	1.66667	0	1	0	1	0	2	1.33333	0	3	0	3	0	2	0	3	2.75	0	1	0	3	0	3	0	3	0	3	0	3	0	3	2.28571	0	1	-0.333333	-1.41667	-0.952381	0.333333	-0.592262
LTRL590_360012800.1	LtrL590_36:212,282..213,061(+)	259	780	Protein C21orf2 homolog, putative	0.333333	4	0	2	0	2	2.66667	0.333333	4	0.333333	4	0	5	4.33333	0	4	0	4	0	3	0	4	3.75	0.333333	4	0	4	0	4	0	4	0	4	0	3	0	4	3.28571	0	2	1.66667	0.583333	1.04762	2.33333	1.40774
LTRL590_330010700.1	LtrL590_33:157,640..158,689(-)	349	1050	d-xylulose reductase, putative	0	2	0	2	0	2	2	0	3	0	3	0	5	3.66667	0	4	0	4	0	4	0	3	3.75	0	3	0	4	0	5	0	4	0	4	0	4	0	4	3.42857	0	3	1.66667	-0.0833333	0.238095	0.666667	0.622024
LTRL590_040008200.1	LtrL590_04:100,732..101,286(+)	184	555	ADP-ribosylation factor, putative	#DIV/0!	0	#DIV/0!	0	#DIV/0!	0	0	0	1	0	1	0	2	1.33333	0	1	0	2	0	2	0	2	1.75	0	1	0	2	0	1	0	2	0	2	0	2	0	2	1.42857	0	1	1.33333	-0.416667	-0.0952381	0.333333	0.28869
LTRL590_340013300.1	LtrL590_34:328,784..330,193(+)	469	1410	hypothetical protein, conserved	#DIV/0!	3	3	4	4	5	4	0	2	0	2	0.333333	4	2.66667	3	4	3	4	3	4	1	6	4.5	0	2	1	6	1	6	1	6	1	6	1	6	1	6	4.71429	#DIV/0!	3	-1.33333	-1.83333	-2.04762	-0.333333	-1.3869
LTRL590_040012900.1	LtrL590_04:309,992..310,912(-)	306	921	hypothetical protein, conserved	1	4	0	3	0.5	3	3.33333	0	1	0	1	2	3	1.66667	0	2	0	2	0	2	0	2	2	0	1	0	2	0	2	0	2	0	2	0	2	0	2	1.57143	0	2	-1.66667	-0.333333	0.0952381	-0.333333	-0.559524
LTRL590_310015400.1	LtrL590_31:343,565..344,041(-)	158	477	KIAA1430 homologue, putative	#DIV/0!	0	#DIV/0!	0	1	2	0.666667	1	2	1	2	3	4	2.66667	1	2	1	2	1	2	2	3	2.25	1	2	1	2	1	2	2	3	2	3	2	3	1	2	2.28571	1	2	2	0.416667	0.380952	0.666667	0.866071
LTRL590_220019000.1	LtrL590_22:548,095..549,432(-)	445	1338	hypothetical protein, conserved	0.6	8	0.75	7	0.6	8	7.66667	0.666667	5	0.666667	5	0.25	5	5	0.75	7	0.75	7	0.75	7	0.75	7	7	0.666667	5	0.75	7	0.75	7	0.75	7	0.75	7	0.75	7	0.75	7	5.82143	0.75	7	-2.66667	-2	-0.821429	-2	-1.87202
LTRL590_350007800.1	LtrL590_35:71,025..71,258(+)	77	234	hypothetical protein, conserved	0.25	5	0.25	5	0.2	6	5.33333	#DIV/0!	0	#DIV/0!	0	#DIV/0!	0	0	0.25	5	0.25	5	0.25	5	0.25	5	5	#DIV/0!	0	0.25	5	0.25	5	0.25	5	0.25	5	0.25	5	0.25	5	3.60714	0.25	5	-5.33333	-5	-3.60714	-5	-4.73512
LTRL590_350020600.1	LtrL590_35:568,375..569,472(-)	365	1098	hypothetical protein, conserved	1.66667	8	1.33333	7	1.66667	8	7.66667	1.5	5	1.5	5	2	6	5.33333	1.33333	7	1.33333	7	1.33333	7	1.33333	7	7	1.5	5	1.66667	8	1.33333	7	1.33333	7	1.33333	7	1.33333	7	1.66667	8	6.19048	2	6	-2.33333	-1.66667	-0.857143	-0.666667	-1.38095
LTRL590_090012000.1	LtrL590_09:255,546..256,646(+)	366	1101	hypothetical protein, conserved	5	6	3	4	4	5	5	0.5	6	0.5	6	1	8	6.66667	0.5	3	0.5	3	0.5	3	2	6	3.75	0.5	6	2	6	2.5	7	2	6	2	6	2	6	2	6	5.57143	1.5	5	1.66667	2.91667	1.09524	1.66667	1.83631
LTRL590_360039800.1	LtrL590_36:1,243,036..1,244,337(-)	433	1302	clathrin coat assembly protein-like protein	0.125	9	0.166667	7	0.142857	8	8	0.4	7	0.4	7	0.2	6	6.66667	0.125	9	0.125	9	0.125	9	0.125	9	9	0.4	7	0.125	9	0.125	9	0.125	9	0.125	9	0.125	9	0.125	9	7.44643	0.125	9	-1.33333	-2.33333	-0.779762	-2.33333	-1.69494
LTRL590_270033100.1	LtrL590_27:1,094,880..1,095,374(+)	164	495	hypothetical protein	1	4	1	4	2	3	3.66667	0.666667	5	0.666667	5	1	2	4	2	3	2	3	2	3	#DIV/0!	0	2.25	0.666667	5	2	3	2	3	2	3	2	3	2	3	2	3	3.14286	1	2	0.333333	1.75	0.857143	2	1.23512
LTRL590_210005900.1	LtrL590_21:20,852..22,126(+)	424	1275	WD domain, G-beta repeat, putative	2	6	2	6	1.33333	7	6.33333	0.5	3	0.5	3	1	4	3.33333	1.66667	8	1.66667	8	1.66667	8	1.66667	8	8	0.5	3	1.66667	8	1.66667	8	1.66667	8	1.66667	8	1.66667	8	1.66667	8	6.38095	1.33333	7	-3	-4.66667	-3.04762	-3.66667	-3.59524
LTRL590_340031300.1	LtrL590_34:1,024,668..1,026,494(+)	608	1827	Domain of unknown function DUF21, putative	0.25	5	0.2	6	0.2	6	5.66667	1	6	1	6	0.25	5	5.66667	0.5	6	0.5	6	0.5	6	0.8	9	6.75	1	6	0.8	9	0.8	9	0.8	9	0.8	9	0.8	9	0.8	9	7.4	0.5	6	0	-1.08333	-1.73333	-0.333333	-0.7875
LTRL590_230026100.1	LtrL590_23:744,581..745,987(+)	468	1407	hypothetical protein, conserved	1.25	9	2	6	1	8	7.66667	4	5	4	5	2	6	5.33333	3.5	9	3.5	9	3.5	9	3.5	9	9	4	5	3.5	9	3.5	9	3.5	9	3.5	9	3.5	9	3.5	9	7.64286	3.5	9	-2.33333	-3.66667	-2.30952	-3.66667	-2.99405
LTRL590_280008100.1	LtrL590_28:96,339..97,370(+)	343	1032	hypothetical protein, conserved	1	6	0.75	7	1	6	6.33333	0.166667	7	0.166667	7	1.5	5	6.33333	1	6	1	6	1	6	#DIV/0!	0	4.5	0.166667	7	1	6	1	6	1	6	1	6	1	6	1	6	5.42857	1.5	5	0	1.83333	0.904762	1.33333	1.01786
LTRL590_270009500.1	LtrL590_27:126,447..127,439(+)	330	993	RNA processing factor 1, putative	0	1	0	2	0	2	1.66667	#DIV/0!	2	#DIV/0!	2	#DIV/0!	2	2	0.333333	4	1	2	0.333333	4	0.333333	4	3.5	#DIV/0!	2	0.333333	4	0.333333	4	0	2	0	2	0	2	0.333333	4	2.57143	0.5	3	0.333333	-1.5	-0.571429	-1	-0.684524
LTRL590_240026700.1	LtrL590_24:749,186..750,643(-)	485	1458	hypothetical protein, conserved	0.5	9	0.666667	10	0.5	9	9.33333	1	10	1	10	0.833333	11	10.3333	0.571429	11	0.571429	11	0.571429	11	0.571429	11	11	1	10	0.571429	11	0.571429	11	0.571429	11	0.571429	11	0.571429	11	0.571429	11	9.36735	0.666667	10	1	-0.666667	0.965986	0.333333	0.408163
LTRL590_260025200.1	LtrL590_26:749,774..750,394(+)	206	621	hypothetical protein, conserved	#DIV/0!	2	#DIV/0!	2	2	3	2.33333	3	4	3	4	1	6	4.66667	3	4	3	4	3	4	3	4	4	3	4	3	4	3	4	3	4	3	4	3	4	3	4	3.85714	#DIV/0!	3	2.33333	0.666667	0.809524	1.66667	1.36905
LTRL590_360080100.1	LtrL590_36:2,605,605..2,607,266(-)	553	1662	2,3-bisphosphoglycerate-independent phosphoglycerate mutase	0	4	0	4	0	5	4.33333	0.666667	5	0.666667	5	1	4	4.66667	2	3	2	3	2	3	0.4	7	4	0.666667	5	0.4	7	0.4	7	0.4	7	0.4	7	0.4	7	0.4	7	5.77143	0.666667	5	0.333333	0.666667	-1.10476	-0.333333	-0.109524
LTRL590_240030200.1	LtrL590_24:862,304..863,872(-)	522	1569	notchless homolog, putative	0.2	6	0.333333	8	0.2	6	6.66667	0.2	6	0.2	6	0	2	4.66667	0.333333	8	0.333333	8	0.333333	8	0.333333	8	8	0.2	6	0.333333	8	0.333333	8	0.333333	8	0.333333	8	0.333333	8	0.333333	8	6.61905	0.333333	8	-2	-3.33333	-1.95238	-3.33333	-2.65476
LTRL590_160018300.1	LtrL590_16:491,566..492,279(+)	237	714	tyrosyl or methionyl-tRNA synthetase-like protein	#DIV/0!	0	#DIV/0!	0	#DIV/0!	1	0.333333	#DIV/0!	0	#DIV/0!	0	#DIV/0!	0	0	0	2	0	2	0	2	0	2	2	#DIV/0!	0	0	2	0	2	0	2	0	2	0	2	0	2	1.42857	0	2	-0.333333	-2	-1.42857	-2	-1.44048
LTRL590_150005700.1	LtrL590_15:24,750..25,715(-)	321	966	hypothetical protein, conserved	0	1	0	1	0	2	1.33333	1	2	1	2	0.5	3	2.33333	0	3	0	3	0	3	0	3	3	1	2	0	3	0	3	0	3	0	3	0	3	0	3	2.42857	0	3	1	-0.666667	-0.0952381	-0.666667	-0.107143
LTRL590_360029400.1	LtrL590_36:878,060..878,449(+)	129	390	dynein light chain, putative	1	2	#DIV/0!	1	#DIV/0!	1	1.33333	0	2	0	2	0.5	3	2.33333	0.5	3	0.5	3	0.5	3	0.5	3	3	0	2	0.5	3	0.5	3	0.5	3	0.5	3	0.5	3	0.5	3	2.5	0.5	3	1	-0.666667	-0.166667	-0.666667	-0.125
LTRL590_300013900.1	LtrL590_30:256,311..257,843(+)	510	1533	rac serine-threonine kinase, putative	1	2	0.5	3	1	2	2.33333	0	3	0	3	0.5	3	3	0.333333	4	0.333333	4	0.333333	4	0.333333	4	4	0	3	0.333333	4	0.333333	4	0.333333	4	0.333333	4	0.333333	4	0.333333	4	3.33333	0.333333	4	0.666667	-1	-0.333333	-1	-0.416667
LTRL590_310018100.1	LtrL590_31:461,994..463,211(-)	405	1218	N-acyl-L-amino acid amidohydrolase, putative	1	2	1	4	0.5	3	3	0.666667	5	0.333333	4	0.25	5	4.66667	2	3	1	4	2	3	1.5	5	3.75	0.333333	4	3	4	2	3	3	4	1.5	5	#DIV/0!	2	3	4	3.57143	#DIV/0!	2	1.66667	0.916667	1.09524	2.66667	1.58631
LTRL590_360015600.1	LtrL590_36:371,089..371,550(+)	153	462	40S ribosomal protein S18, putative	#DIV/0!	1	#DIV/0!	1	#DIV/0!	1	1	2	3	2	3	2	3	3	1	2	1	2	0	1	1	2	1.75	2	3	1	2	1	2	1	2	1	2	#DIV/0!	0	#DIV/0!	1	1.57143	#DIV/0!	0	2	1.25	1.42857	3	1.91964
LTRL590_070011300.1	LtrL590_07:261,371..262,165(+)	264	795	60S ribosomal protein L7a, putative	#DIV/0!	1	#DIV/0!	1	#DIV/0!	1	1	0	1	0	1	0	1	1	0	1	1	2	1	2	1	2	1.75	0	1	1	2	1	2	1	2	1	2	0	1	1	2	1.57143	#DIV/0!	0	0	-0.75	-0.571429	1	-0.0803571
LTRL590_270027100.1	LtrL590_27:886,538..886,873(-)	111	336	small nuclear ribonucleoprotein protein, putative	1	2	#DIV/0!	1	#DIV/0!	1	1.33333	0	1	0	1	0	1	1	2	3	2	3	2	3	2	3	3	0	1	2	3	2	3	2	3	2	3	2	3	2	3	2.57143	2	3	-0.333333	-2	-1.57143	-2	-1.47619
LTRL590_360068200.1	LtrL590_36:2,209,927..2,210,634(-)	235	708	hypothetical protein, conserved	0.5	3	1	4	1	4	3.66667	0.5	6	0.5	6	0.5	3	5	1	2	1	2	1	2	1.5	5	2.75	0.5	6	1.5	5	1.5	5	1.5	5	1.5	5	1.5	5	1.5	5	4.64286	1	4	1.33333	2.25	0.357143	1	1.23512
LTRL590_350028900.1	LtrL590_35:877,277..878,731(+)	484	1455	aminopeptidase P, putative	0.4	7	0.4	7	0.2	6	6.66667	0	2	0	2	0	2	2	0.4	7	0.4	7	0.4	7	0.4	7	7	0	2	0.4	7	0.4	7	0.4	7	0.4	7	0.4	7	0.4	7	5.34286	0.4	7	-4.66667	-5	-3.34286	-5	-4.50238
LTRL590_150007400.1	LtrL590_15:86,420..87,067(-)	215	648	hypothetical protein, conserved	4	5	4	5	2	6	5.33333	2	3	2	3	2	3	3	6	7	6	7	6	7	6	7	7	2	3	6	7	6	7	6	7	6	7	6	7	6	7	6.28571	6	7	-2.33333	-4	-3.28571	-4	-3.40476
LTRL590_340032900.1	LtrL590_34:1,085,569..1,087,380(+)	603	1812	hypothetical protein, conserved	0.4	7	0.4	7	0.4	7	7	0.666667	10	0.666667	10	0.333333	12	10.6667	0.4	7	0.4	7	0.4	7	0.666667	10	7.75	0.666667	10	0.666667	10	0.666667	10	0.666667	10	0.666667	10	0.666667	10	0.666667	10	8.66667	0.4	7	3.66667	2.91667	2	3.66667	3.0625
LTRL590_360068300.1	LtrL590_36:2,211,503..2,212,987(-)	494	1485	hypothetical protein, conserved	1	4	0.5	3	1	2	3	0.142857	8	0.142857	8	0.666667	5	7	1	2	1	2	1	2	1	4	2.5	0.142857	8	1	4	1	4	1	4	1	4	1	4	1	4	4.14286	1	4	4	4.5	2.85714	3	3.58929
LTRL590_340023200.1	LtrL590_34:703,194..703,673(-)	159	480	hypothetical protein, conserved	0	2	#DIV/0!	0	0	1	1	0.5	3	0.5	3	0	2	2.66667	#DIV/0!	0	#DIV/0!	0	#DIV/0!	0	0	2	0.5	0.5	3	0	2	0	2	0	2	0	2	0	2	0	2	1.85714	#DIV/0!	0	1.66667	2.16667	0.809524	2.66667	1.82738
LTRL590_280035200.1	LtrL590_28:1,099,327..1,101,810(-)	827	2484	gamma-tubulin complex subunit, putative	0.333333	8	0.4	7	0.333333	8	7.66667	1	4	1	4	1	6	4.66667	0.333333	8	0.333333	8	0.333333	8	#DIV/0!	0	6	1	4	0.333333	8	0.333333	8	0.333333	8	0.333333	8	0.333333	8	0.333333	8	6.33333	0.5	6	-3	-1.33333	-1.66667	-1.33333	-1.83333
LTRL590_130014800.1	LtrL590_13:346,636..347,355(-)	239	720	Dpy-30 motif containing protein, putative	3	4	2	3	2	3	3.33333	0.5	3	0.5	3	0	2	2.66667	1.5	5	1.5	5	1.5	5	1.5	5	5	0.5	3	1.5	5	1.5	5	1.5	5	1.5	5	1.5	5	1.5	5	4.21429	1.5	5	-0.666667	-2.33333	-1.54762	-2.33333	-1.72024
LTRL590_050014600.1	LtrL590_05:381,464..381,736(-)	90	273	hypothetical protein, conserved	0	1	0	2	0	1	1.33333	0	1	0	1	0	1	1	0	1	0	2	0	2	0	2	1.75	0	1	0	2	0	2	0	2	0	2	0	2	0	2	1.57143	#DIV/0!	0	-0.333333	-0.75	-0.571429	1	-0.16369
LTRL590_280009900.1	LtrL590_28:165,903..167,471(-)	522	1569	propionyl-coa carboxylase beta chain, putative	0.571429	11	0.444444	13	0.5	12	12	0.666667	5	0.666667	5	1.5	5	5	0.4	14	0.4	14	0.4	14	#DIV/0!	0	10.5	0.666667	5	0.4	14	0.4	14	0.4	14	0.4	14	0.4	14	0.4	14	10.7714	0.5	12	-7	-5.5	-5.77143	-7	-6.31786
LTRL590_310042400.1	LtrL590_31:1,500,587..1,501,405(-)	272	819	hypothetical protein, conserved	2	3	0	1	2	3	2.33333	1	2	1	2	0	2	2	0.333333	4	0.333333	4	0.333333	4	0.333333	4	4	1	2	0.333333	4	0.333333	4	0.333333	4	0.333333	4	0.333333	4	0.333333	4	3.19048	0.333333	4	-0.333333	-2	-1.19048	-2	-1.38095
LTRL590_120005700.1	LtrL590_12:11,359..11,937(+)	192	579	ribonuclease mar1	1	2	1	2	2	3	2.33333	0.25	5	0.25	5	0.333333	4	4.66667	1	4	1	4	1	4	1	4	4	0.25	5	1	4	1	4	1	4	1	4	1	4	1	4	3.71429	1	4	2.33333	0.666667	0.952381	0.666667	1.15476
LTRL590_280034300.1	LtrL590_28:1,080,400..1,081,323(+)	307	924	protein phosphatase 4 catalytic subunit, putative	0	5	0	5	0	4	4.66667	0	3	0	3	0	2	2.66667	0	4	0	4	0	4	#DIV/0!	0	3	0	3	0	4	0	4	0	4	0	4	0	4	0	4	3.28571	0	3	-2	-0.333333	-0.619048	-0.333333	-0.821429
LTRL590_110019500.1	LtrL590_11:527,553..529,446(+)	631	1893	ATP-binding cassette protein subfamily A, member 2, putative	0.666667	5	#DIV/0!	1	#DIV/0!	1	2.33333	0.2	6	0.2	6	0.25	5	5.66667	#DIV/0!	1	#DIV/0!	1	#DIV/0!	1	#DIV/0!	1	1	0.2	6	1	2	1	2	1	2	1	2	1	2	1	2	2.42857	#DIV/0!	1	3.33333	4.66667	3.2381	4.66667	3.97619
LTRL590_230007300.1	LtrL590_23:69,562..70,053(+)	163	492	endoribonuclease L-PSP (pb5), putative	1.5	5	1	4	1	4	4.33333	2	6	1.33333	7	0.5	6	6.33333	1	6	1	6	1	6	1	2	5	1.33333	7	1	6	1	6	1	2	1	2	1	2	1	6	4.28571	1	6	2	1.33333	2.04762	0.333333	1.42857
LTRL590_360035500.1	LtrL590_36:1,101,918..1,103,303(-)	461	1386	dihydrolipoamide acetyltransferase precursor, putative	0.25	5	0	4	0	4	4.33333	1.5	10	1.5	10	0.4	7	9	0.2	6	0.2	6	0.2	6	0.2	6	6	1.5	10	0.2	6	0.2	6	0.2	6	0.2	6	0.2	6	0.2	6	5.74286	0.2	6	4.66667	3	3.25714	3	3.48095
LTRL590_280006100.1	LtrL590_28:31,422..32,039(+)	205	618	proteasome beta 3 subunit, putative	0	5	0	5	0	6	5.33333	0	2	0	2	0	2	2	0	5	0	5	0	5	#DIV/0!	0	3.75	0	2	0	5	0	5	0	5	0	5	0	5	0	5	3.85714	0	5	-3.33333	-1.75	-1.85714	-3	-2.48512
LTRL590_350017100.1	LtrL590_35:443,808..444,971(+)	387	1164	NADH-dependent fumarate reductase, putative	1	10	1.25	9	1	10	9.66667	0.333333	8	0.333333	8	0.428571	10	8.66667	1.25	9	1.25	9	1.25	9	1.25	9	9	0.333333	8	1.25	9	1.25	9	1.25	9	1.25	9	1.25	9	1.25	9	7.75	1.25	9	-1	-0.333333	0.916667	-0.333333	-0.1875
LTRL590_270021100.1	LtrL590_27:616,761..617,765(+)	334	1005	proteasome regulatory non-ATP-ase subunit 3, putative	0.4	7	0.25	5	0.25	5	5.66667	#DIV/0!	1	#DIV/0!	1	#DIV/0!	1	1	0.25	5	0.25	5	0.25	5	0.25	5	5	#DIV/0!	1	0.25	5	0.25	5	0.25	5	0.25	5	0.25	5	0.25	5	3.75	0.25	5	-4.66667	-4	-2.75	-4	-3.85417
LTRL590_280014600.1	LtrL590_28:330,223..331,134(+)	303	912	hypothetical protein, conserved	1.2	11	1	10	1	10	10.3333	0.428571	10	0.428571	10	2	9	9.66667	1.2	11	1.2	11	1.2	11	#DIV/0!	1	8.5	0.428571	10	1.2	11	1.2	11	1.2	11	1.2	11	1.2	11	1.2	11	9.45714	1	10	-0.666667	1.16667	0.209524	-0.333333	0.0940476
LTRL590_050015700.1	LtrL590_05:411,022..411,759(+)	245	738	Methyltransferase domain containing protein, putative	0	1	#DIV/0!	0	#DIV/0!	0	0.333333	0	1	0	1	0	1	1	0	2	0	2	0	2	#DIV/0!	0	1.5	0	1	0	2	0	2	0	2	0	2	0	2	0	2	1.57143	#DIV/0!	0	0.666667	-0.5	-0.571429	1	0.14881
LTRL590_330042000.1	LtrL590_33:1,439,641..1,440,072(+)	143	432	h1 histone-like protein	#DIV/0!	1	#DIV/0!	1	#DIV/0!	1	1	0.5	3	0.5	3	0	2	2.66667	0.5	3	0.5	3	0.5	3	0	2	2.75	0.5	3	0.5	3	0.5	3	0.5	3	0.5	3	0.5	3	0.5	3	2.64286	0	2	1.66667	-0.0833333	0.0238095	0.666667	0.568452
LTRL590_220016900.1	LtrL590_22:475,052..476,230(-)	392	1179	ribonucleoside-diphosphate reductase small chain, putative	1	4	1	4	1	4	4	0.5	6	0.5	6	#DIV/0!	1	4.33333	1.5	5	3	4	1.5	5	1.5	5	4.75	0.5	6	2	6	1.5	5	1.5	5	2	6	2	3	1.5	5	4.64286	2	3	0.333333	-0.416667	-0.309524	1.33333	0.235119
LTRL590_120007400.1	LtrL590_12:73,570..74,805(+)	411	1236	proteasome regulatory ATPase subunittcc1l8.3, putative	0	1	0	1	0	2	1.33333	0.333333	4	0.333333	4	0	6	4.66667	0.5	3	0.5	3	0.5	3	0.5	3	3	0.333333	4	0.5	3	0.5	3	0.5	3	0.5	3	0.5	3	0.5	3	2.78571	0.5	3	3.33333	1.66667	1.88095	1.66667	2.1369
LTRL590_180021700.1	LtrL590_18:742,658..743,428(+)	256	771	hypothetical protein, conserved	0	1	0	3	#DIV/0!	0	1.33333	1	4	1	4	0.75	7	5	0.5	3	0.5	3	0.5	3	0.5	3	3	1	4	0.5	3	0.5	3	0.5	3	0.5	3	0.5	3	0.5	3	2.78571	0.5	3	3.66667	2	2.21429	2	2.47024
LTRL590_360056000.1	LtrL590_36:1,762,147..1,762,950(+)	267	804	Protein of unknown function (DUF2870), putative	0	1	0	2	0	1	1.33333	3	4	3	4	1	2	3.33333	0.5	3	0.5	3	0.5	3	0.5	3	3	3	4	0.5	3	0.5	3	0.5	3	0.5	3	0.5	3	0.5	3	2.78571	0.5	3	2	0.333333	0.547619	0.333333	0.803571
LTRL590_300043000.1	LtrL590_30:1,315,076..1,315,819(+)	247	744	CYC2-like protein, putative	0	1	0	1	1	2	1.33333	0.333333	4	0.333333	4	1	4	4	0.5	3	0.5	3	0.5	3	0.5	3	3	0.333333	4	0.5	3	0.5	3	0.5	3	0.5	3	0.5	3	0.5	3	2.78571	0.5	3	2.66667	1	1.21429	1	1.47024
LTRL590_300021100.1	LtrL590_30:527,296..528,792(+)	498	1497	pseudouridine synthase A-like protein, putative	0.285714	9	1	6	0.285714	9	8	1	6	1	6	0.5	3	5	0.5	9	0.5	9	0.5	9	0.5	9	9	1	6	0.5	9	0.5	9	0.5	9	0.5	9	0.5	9	0.5	9	7.35714	0.5	9	-3	-4	-2.35714	-4	-3.33929
LTRL590_250016100.1	LtrL590_25:381,644..381,865(+)	73	222	hypothetical protein, conserved	1	2	1	2	1	2	2	#DIV/0!	3	#DIV/0!	3	#DIV/0!	3	3	2	3	2	3	#DIV/0!	1	2	3	2.5	#DIV/0!	3	2	3	2	3	2	3	2	3	2	3	2	3	2.85714	#DIV/0!	1	1	0.5	0.142857	2	0.910714
LTRL590_360010900.1	LtrL590_36:146,945..147,880(+)	311	936	cell division related protein kinase 2	0	2	0	2	0	2	2	0	5	0	5	0	3	4.33333	0	3	0	3	0	1	0	3	2.5	0	5	0	3	0	3	0	3	0	3	0	3	0	3	2.85714	0	1	2.33333	1.83333	1.47619	3.33333	2.24405
LTRL590_320005400.1	LtrL590_32:20,169..21,170(-)	333	1002	protein transport protein SEC13, putative	0.5	6	0.4	7	0.333333	8	7	0	2	0	2	1	2	2	0.4	7	0.4	7	0.4	7	#DIV/0!	0	5.25	0	2	0.4	7	0.4	7	0.4	7	0.4	7	0.4	7	0.4	7	5.34286	0.5	6	-5	-3.25	-3.34286	-4	-3.89821
LTRL590_360048000.1	LtrL590_36:1,464,105..1,465,055(+)	316	951	MORN repeat, putative	0.5	3	0.5	3	1	4	3.33333	#DIV/0!	2	#DIV/0!	2	2	3	2.33333	1.5	5	1.5	5	1.5	5	1.5	5	5	#DIV/0!	2	1.5	5	1.5	5	1.5	5	1.5	5	1.5	5	1.5	5	4.07143	1.5	5	-1	-2.66667	-1.7381	-2.66667	-2.01786
LTRL590_050016600.1	LtrL590_05:436,902..438,278(-)	458	1377	hypothetical protein, conserved	0	2	0	2	0	2	2	0.5	3	0.5	3	0	2	2.66667	0	4	0	4	0	4	0	2	3.5	0.5	3	0	4	0	4	0	4	0	4	0	4	0	4	3.28571	0	2	0.666667	-0.833333	-0.619048	0.666667	-0.0297619
LTRL590_220019400.1	LtrL590_22:562,614..564,083(+)	490	1470	ATP-dependent DEAD/H RNA helicase, putative	1	4	1	4	1	4	4	0	3	0	3	0	2	2.66667	1	4	2	3	1	4	2	3	3.5	0	3	2	3	2	3	1	4	0	1	0	1	1	4	2.28571	1	4	-1.33333	-0.833333	0.380952	-1.33333	-0.779762
LTRL590_340041500.1	LtrL590_34:1,385,524..1,386,045(+)	173	522	Complex 1 protein (LYR family), putative	#DIV/0!	0	#DIV/0!	0	#DIV/0!	0	0	0	1	0	1	0	3	1.66667	#DIV/0!	0	#DIV/0!	0	#DIV/0!	0	1	2	0.5	0	1	1	2	1	2	1	2	1	2	1	2	1	2	1.71429	#DIV/0!	0	1.66667	1.16667	-0.047619	1.66667	1.1131
LTRL590_340032300.1	LtrL590_34:1,065,149..1,065,442(+)	97	294	hypothetical protein, conserved	1	2	1	2	1	2	2	1.5	5	1.5	5	1.33333	7	5.66667	1	2	1	2	1	2	1	4	2.5	1.5	5	1	4	1	4	1	4	1	4	1	4	1	4	3.71429	1	2	3.66667	3.16667	1.95238	3.66667	3.1131
LTRL590_340028200.1	LtrL590_34:887,747..887,983(-)	78	237	hypothetical protein, conserved	#DIV/0!	2	#DIV/0!	2	#DIV/0!	2	2	1.33333	7	1.33333	7	4	5	6.33333	#DIV/0!	2	#DIV/0!	2	#DIV/0!	2	3	4	2.5	1.33333	7	3	4	3	4	3	4	3	4	#DIV/0!	0	3	4	3.71429	#DIV/0!	2	4.33333	3.83333	2.61905	4.33333	3.77976
LTRL590_230007400.1	LtrL590_23:73,446..74,109(+)	221	663	hypothetical protein	0.5	3	0	1	0	1	1.66667	1	4	0.5	3	0.666667	5	4	0	2	0.333333	4	0	1	#DIV/0!	0	1.75	0.5	3	0	1	0	2	0	1	#DIV/0!	0	#DIV/0!	0	0	1	1	#DIV/0!	0	2.33333	2.25	3	4	2.89583
LTRL590_350019100.1	LtrL590_35:501,376..502,848(+)	490	1473	mitochondrial processing peptidase, beta subunit, putative	0.333333	4	0	4	0.5	3	3.66667	0	5	0	5	0.5	3	4.33333	0	2	0	2	0	2	0	2	2	0	5	0	2	0	2	0	2	0	2	0	2	0	2	2.14286	0	2	0.666667	2.33333	2.19048	2.33333	1.88095
LTRL590_200018800.1	LtrL590_20:573,309..573,764(+)	151	456	small myristoylated protein 4, putative	#DIV/0!	1	#DIV/0!	1	1	2	1.33333	0.5	3	0.5	3	1	4	3.33333	2	3	2	3	2	3	2	3	3	0.5	3	2	3	2	3	2	3	2	3	2	3	2	3	2.85714	2	3	2	0.333333	0.47619	0.333333	0.785714
LTRL590_330012800.1	LtrL590_33:226,046..226,510(+)	154	465	hypothetical protein, conserved	#DIV/0!	0	0	1	#DIV/0!	0	0.333333	0	3	0	3	0.2	6	4	0	2	0	2	0	2	0	2	2	0	3	0	2	0	2	0	2	0	2	0	2	0	2	1.85714	0	2	3.66667	2	2.14286	2	2.45238
LTRL590_360072900.1	LtrL590_36:2,374,625..2,375,620(-)	331	996	hypothetical protein, conserved	0	3	0	3	0	3	3	0	6	0	6	0	6	6	1	2	1	2	1	2	0.25	5	2.75	0	6	0.25	5	0.25	5	0.25	5	0.25	5	0.25	5	0.25	5	4.46429	0	4	3	3.25	1.53571	2	2.44643
LTRL590_350022100.1	LtrL590_35:622,905..623,714(-)	269	810	hypothetical protein, conserved	0.4	7	0.4	7	0.4	7	7	#DIV/0!	2	#DIV/0!	2	1	2	2	0.4	7	0.4	7	0.4	7	0.4	7	7	#DIV/0!	2	0.4	7	0.4	7	0.4	7	0.4	7	0.4	7	0.4	7	5.34286	0.2	6	-5	-5	-3.34286	-4	-4.33571
LTRL590_100013300.1	LtrL590_10:277,253..277,903(-)	216	651	Ras-related protein RabX1, putative	0.5	3	#DIV/0!	2	0.5	3	2.66667	#DIV/0!	2	#DIV/0!	2	#DIV/0!	3	2.33333	1	2	1	2	1	2	0.666667	5	2.75	#DIV/0!	2	0.666667	5	0.666667	5	0.666667	5	0.666667	5	0.666667	5	0.666667	5	3.95238	1	2	-0.333333	-0.416667	-1.61905	0.333333	-0.508929
LTRL590_280009100.1	LtrL590_28:142,497..143,870(-)	457	1374	hypothetical protein, conserved	0.666667	10	1.2	11	0.8	9	10	1	6	1	6	0.6	8	6.66667	1.4	12	1.4	12	1.4	12	#DIV/0!	1	9.25	1	6	1.4	12	1.4	12	1.2	11	1.2	11	1.2	11	1.4	12	9.31429	1.2	11	-3.33333	-2.58333	-2.64762	-4.33333	-3.2244
LTRL590_270011800.1	LtrL590_27:248,448..249,959(+)	503	1512	hypothetical protein, conserved	1.2	11	0.7	17	1	10	12.6667	0.7	17	0.7	17	0.888889	17	17	0.857143	13	0.666667	5	0.857143	13	0.857143	13	11	0.7	17	0.857143	13	0.714286	12	0.857143	13	0.857143	13	0.875	15	0.857143	13	11.9796	0.833333	11	4.33333	6	5.02041	6	5.33844
LTRL590_350022000.1	LtrL590_35:621,544..621,975(-)	143	432	60S ribosomal protein L26, putative	0.5	3	0.5	3	0.5	3	3	0	1	0	1	0	1	1	0.333333	4	0.333333	4	0.333333	4	0.333333	4	4	0	1	0.333333	4	0.5	3	0.333333	4	0.333333	4	#DIV/0!	0	0.333333	4	2.33333	0.333333	4	-2	-3	-1.33333	-3	-2.33333
LTRL590_300011100.1	LtrL590_30:180,768..181,334(-)	188	567	nuclear cap binding protein, putative	0.5	3	0.5	3	0.5	3	3	0.5	3	0.5	3	#DIV/0!	0	2	1	2	1	2	1	2	1	2	2	0.5	3	1	2	1	2	1	2	1	2	1	2	1	2	2	0	1	-1	0	0	1	0
LTRL590_350032900.1	LtrL590_35:1,024,339..1,025,604(-)	421	1266	acyl-CoA dehydrogenase, putative	0.666667	10	1	8	0.8	9	9	0.8	9	0.8	9	2	6	8	1	8	1	8	1	8	1	8	8	0.8	9	1	8	1	8	1	8	1	8	1	8	1.33333	7	7	1	8	-1	0	1	0	0
LTRL590_360059300.1	LtrL590_36:1,884,384..1,885,337(+)	317	954	paraflagellar rod component, putative	0	3	0	3	0	3	3	0	3	0	3	0.333333	4	3.33333	0	5	0	5	0	5	0	5	5	0	3	0	5	0	5	0	5	0	5	0	5	0	5	4	0	4	0.333333	-1.66667	-0.666667	-0.666667	-0.666667
LTRL590_360080900.1	LtrL590_36:2,623,838..2,624,548(-)	236	711	mitochondrial carrier protein, putative	0	1	0	1	0	1	1	2	3	2	3	#DIV/0!	1	2.33333	#DIV/0!	1	#DIV/0!	1	#DIV/0!	1	#DIV/0!	1	1	2	3	1	2	1	2	1	2	1	2	1	2	1	2	2	#DIV/0!	0	1.33333	1.33333	0.333333	2.33333	1.33333
LTRL590_360038500.1	LtrL590_36:1,205,512..1,207,164(-)	550	1653	predicted zinc finger protein	0.25	5	0.25	5	0.25	5	5	0.75	7	0.75	7	1.5	5	6.33333	0.4	7	0.4	7	0.4	7	0.4	7	7	0.75	7	0.4	7	0.4	7	0.4	7	0.4	7	0.4	7	0.4	7	6.05714	0.2	6	1.33333	-0.666667	0.27619	0.333333	0.319048
LTRL590_230021300.1	LtrL590_23:575,100..576,755(+)	551	1656	T-complex protein 1, gamma subunit, putative	0.333333	4	0.333333	4	0.333333	4	4	1.5	5	1.5	5	1	4	4.66667	0.5	6	0.5	6	0.5	6	0.5	6	6	1.5	5	0.5	6	0.5	6	0.5	6	0.5	6	0.5	6	0.5	6	5.07143	0.666667	5	0.666667	-1.33333	-0.404762	-0.333333	-0.35119
LTRL590_360030400.1	LtrL590_36:916,448..917,371(+)	307	924	guanylate kinase-like protein	3	4	4	5	1	6	5	1	4	1	4	0.5	3	3.66667	2	6	2	6	2	6	2	6	6	1	4	2	6	2	6	2	6	2	6	2	6	2	6	5.14286	3	4	-1.33333	-2.33333	-1.47619	-0.333333	-1.36905
LTRL590_210020800.1	LtrL590_21:537,870..538,643(-)	257	774	R-SNARE protein, putative	0	2	0	4	0	3	3	0	2	0	2	0.333333	4	2.66667	0	4	0	4	0	4	0	4	4	0	2	0	4	0	4	0	4	0	4	0	4	0	4	3.14286	0	2	-0.333333	-1.33333	-0.47619	0.666667	-0.369048
LTRL590_080013300.1	LtrL590_08:331,852..332,466(-)	204	615	hypothetical protein, conserved	4	5	1	4	2	6	5	1	4	1	4	3	4	4	2	6	2	6	2	6	2	6	6	1	4	2	6	2	6	2	6	2	6	2	6	2	6	5.14286	3	4	-1	-2	-1.14286	0	-1.03571
LTRL590_230005300.1	LtrL590_23:8,630..10,066(+)	478	1437	beta propeller protein, putative	1	6	1	4	1	4	4.66667	0	5	0	5	0	2	4	0.666667	5	0.666667	5	0.666667	5	0	1	4	0	5	0.666667	5	0.666667	5	0	1	0	1	0	1	0.666667	5	3.14286	0.666667	5	-0.666667	0	0.857143	-1	-0.202381
LTRL590_040012600.1	LtrL590_04:297,581..298,222(-)	213	642	60S ribosomal protein L10, putative	0	2	0	2	0	2	2	#DIV/0!	1	1	2	0	1	1.33333	#DIV/0!	0	0	2	#DIV/0!	0	0	2	1	1	2	0	2	#DIV/0!	0	0	2	0	2	#DIV/0!	0	0	2	1.14286	#DIV/0!	0	-0.666667	0.333333	0.190476	1.33333	0.297619
LTRL590_250014100.1	LtrL590_25:296,643..297,374(+)	243	732	DNL zinc finger containing protein, putative	2	3	2	3	2	3	3	2	3	2	3	2	3	3	3	4	3	4	2	3	3	4	3.75	2	3	3	4	3	4	3	4	3	4	3	4	3	4	3.71429	1	2	0	-0.75	-0.714286	1	-0.116071
LTRL590_360015500.1	LtrL590_36:369,623..370,084(+)	153	462	40S ribosomal protein S18, putative	#DIV/0!	1	#DIV/0!	1	#DIV/0!	1	1	2	3	2	3	2	3	3	1	2	1	2	0	1	1	2	1.75	2	3	1	2	1	2	1	2	1	2	#DIV/0!	0	1	2	1.71429	#DIV/0!	0	2	1.25	1.28571	3	1.88393
LTRL590_280012700.1	LtrL590_28:274,261..275,562(-)	433	1302	hypothetical protein, conserved	0	7	0	7	0	7	7	1	2	1	2	0	5	3	0	7	0	7	0	7	#DIV/0!	0	5.25	1	2	0	7	0	7	0	7	0	7	0	7	0	7	5.28571	0	6	-4	-2.25	-2.28571	-3	-2.88393
LTRL590_090005300.1	LtrL590_09:5,696..5,881(+)	61	186	hypothetical protein	#DIV/0!	1	#DIV/0!	0	#DIV/0!	1	0.666667	0.5	3	0.5	3	1	2	2.66667	#DIV/0!	0	#DIV/0!	0	#DIV/0!	0	1	2	0.5	0.5	3	1	2	1	2	1	2	1	2	1	2	1	2	2	1	2	2	2.16667	0.666667	0.666667	1.375
LTRL590_360060600.1	LtrL590_36:1,928,606..1,929,688(-)	360	1083	hypothetical protein, conserved	1	4	2	3	2	3	3.33333	0.6	8	0.6	8	0	4	6.66667	1.5	5	1.5	5	1.5	5	1.5	5	5	0.6	8	1.5	5	1.5	5	1.5	5	1.5	5	1.5	5	1.5	5	4.92857	1.5	5	3.33333	1.66667	1.7381	1.66667	2.10119
LTRL590_100012000.1	LtrL590_10:241,643..242,611(-)	322	969	hypothetical protein, conserved	1	2	1	8	#DIV/0!	1	3.66667	1	8	1	8	1.5	5	7	1	4	1	4	1	4	1.5	5	4.25	1	8	1.5	5	1.5	5	1.5	5	1.5	5	1.5	5	1.5	5	4.92857	0.5	3	3.33333	2.75	2.07143	4	3.03869
LTRL590_230025600.1	LtrL590_23:734,105..734,560(+)	151	456	hypothetical protein	3	4	2	6	1.5	5	5	7	8	7	8	#DIV/0!	5	7	2.5	7	2.5	7	2.5	7	2.5	7	7	7	8	2.5	7	2.5	7	2.5	7	2.5	7	4	5	2.5	7	6.21429	5	6	2	0	0.785714	1	0.946429
LTRL590_360020700.1	LtrL590_36:532,248..532,877(-)	209	630	translation elongation factor 1-beta, putative	0	1	0	1	0	1	1	0.5	3	0.5	3	3	4	3.33333	0.5	3	0.5	3	0.5	3	0.5	3	3	0.5	3	0.5	3	0.5	3	0.5	3	0.5	3	#DIV/0!	0	0.5	3	2.21429	1	2	2.33333	0.333333	1.11905	1.33333	1.27976
LTRL590_180022100.1	LtrL590_18:752,258..752,443(+)	61	186	hypothetical protein	2	3	2	3	2	3	3	#DIV/0!	0	#DIV/0!	0	0	2	0.666667	5	6	4	5	2	3	4	5	4.75	#DIV/0!	0	2	3	4	5	4	5	4	5	2	3	4	5	3.57143	2	3	-2.33333	-4.08333	-2.90476	-2.33333	-2.91369
LTRL590_150015400.1	LtrL590_15:392,191..393,735(-)	514	1545	hypothetical protein, conserved	0.666667	5	0.666667	5	0.666667	5	5	1.25	9	1.25	9	1.75	11	9.66667	0.4	7	0.4	7	0.4	7	0.5	6	6.75	1.25	9	0.5	6	0.5	6	0.5	6	0.5	6	0.5	6	0.5	6	5.64286	0.25	5	4.66667	2.91667	4.02381	4.66667	4.06845
LTRL590_310045000.1	LtrL590_31:1,582,641..1,582,862(-)	73	222	hypothetical protein	#DIV/0!	0	#DIV/0!	0	#DIV/0!	0	0	0	1	0	1	#DIV/0!	0	0.666667	1	2	#DIV/0!	1	#DIV/0!	1	#DIV/0!	1	1.25	0	1	#DIV/0!	1	#DIV/0!	1	1	2	1	2	#DIV/0!	0	#DIV/0!	1	1	1	2	0.666667	-0.583333	-0.333333	-1.33333	-0.395833
LTRL590_280011700.1	LtrL590_28:247,639..248,718(-)	359	1080	protein transport protein SEC13, putative	0	5	0	5	0	5	5	0.5	3	0.5	3	0	1	2.33333	0	5	0	5	0	5	#DIV/0!	0	3.75	0.5	3	0	5	0	5	0	5	0	5	0	5	0	5	4	0	3	-2.66667	-1.41667	-1.66667	-0.666667	-1.60417
LTRL590_260012100.1	LtrL590_26:214,089..216,620(-)	843	2532	Regulator of chromosome condensation (RCC1) repeat, putative	0.222222	11	0.222222	11	0.222222	11	11	0.5	9	0.428571	10	0.375	11	10	0.25	15	0.25	15	0.25	15	0.333333	4	12.25	0.428571	10	0.25	15	0.25	15	0.25	15	0.25	15	0.25	15	0.25	15	12.1786	0.3	13	-1	-2.25	-2.17857	-3	-2.10714
LTRL590_110013400.1	LtrL590_11:268,972..269,343(+)	123	372	Cytosol aminopeptidase family, catalytic domain containing protein, putative	0	1	0	1	0	1	1	1	4	1	4	2	3	3.66667	1	2	0.5	3	1	2	1	2	2.25	1	4	1	2	1	2	0.5	3	0.5	3	1	2	1	2	2.21429	2	3	2.66667	1.41667	1.45238	0.666667	1.5506
LTRL590_200007200.1	LtrL590_20:69,629..70,882(-)	417	1254	kelch domain-containing protein	1	2	1	2	1	2	2	0	2	0	2	0	2	2	1	4	1	4	1	4	1	4	4	0	2	1	4	1	4	1	4	1	4	1	4	1	4	3.28571	0.5	3	0	-2	-1.28571	-1	-1.07143
LTRL590_360026200.1	LtrL590_36:772,635..772,913(-)	92	279	60S ribosomal protein L37a, putative	0	2	0	2	0	2	2	0	2	0	2	0	5	3	0	3	0	3	0	3	0	3	3	0	2	0	3	0	3	0	3	0	3	0	2	0	3	2.28571	0	1	1	0	0.714286	2	0.928571
LTRL590_040015300.1	LtrL590_04:390,047..391,006(-)	319	960	acyltransferase-like protein, copy 1	0.333333	4	0.333333	4	0.333333	4	4	2	3	2	3	3	4	3.33333	1	6	1	6	1	6	1	6	6	2	3	1	6	1.5	5	1	6	1	6	1	6	1	6	4.71429	0.666667	5	-0.666667	-2.66667	-1.38095	-1.66667	-1.59524
LTRL590_320009000.1	LtrL590_32:141,970..143,049(-)	359	1080	19S proteasome non-atpase subunit 8	0	5	0	5	0	3	4.33333	0	4	0	4	0	4	4	0	5	0	5	0	5	0	5	5	0	4	0	5	0	5	0	5	0	5	0	5	0	5	4.14286	0	3	-0.333333	-1	-0.142857	1	-0.119048
LTRL590_150016500.1	LtrL590_15:426,200..426,787(-)	195	588	60S ribosomal protein L6, putative	1	4	1	4	0.666667	5	4.33333	1	6	1	6	2	3	5	1	4	1	6	1	4	1.5	5	4.75	1	6	1	6	1.33333	7	1.33333	7	1.33333	7	0	1	1.5	5	4.7619	2	3	0.666667	0.25	0.238095	2	0.78869
LTRL590_250029800.1	LtrL590_25:842,270..843,262(+)	330	993	glycosome import protein	0	3	0	3	0	3	3	0	5	0	5	0.333333	4	4.66667	0.25	5	0.25	5	0	1	0.25	5	4	0	5	0.25	5	0.25	5	0.25	5	0.25	5	0.25	5	0.25	5	4.32143	0.25	5	1.66667	0.666667	0.345238	-0.333333	0.58631
LTRL590_130009900.1	LtrL590_13:168,662..169,555(+)	297	894	Protein of unknown function, DUF607, putative	0.5	6	0.5	6	0.5	6	6	#DIV/0!	4	#DIV/0!	4	2	3	3.66667	0.75	7	0.75	7	0.75	7	0.75	7	7	#DIV/0!	4	0.75	7	0.75	7	0.75	7	0.75	7	0.75	7	0.75	7	5.67857	1.5	5	-2.33333	-3.33333	-2.0119	-1.33333	-2.25298
LTRL590_340031500.1	LtrL590_34:1,032,830..1,034,704(+)	624	1875	NADPH-cytochrome p450 reductase-like protein	0.444444	13	0.285714	9	0.285714	9	10.3333	0.5	9	0.5	9	0.6	8	8.66667	0.375	11	0.375	11	0.375	11	0.363636	15	12	0.5	9	0.363636	15	0.363636	15	0.4	14	0.363636	15	0.363636	15	0.363636	15	12.0571	0.375	11	-1.66667	-3.33333	-3.39048	-2.33333	-2.68095
LTRL590_280020000.1	LtrL590_28:516,064..516,933(+)	289	870	haloacid dehalogenase-like hydrolase-like protein	1.33333	7	1.33333	7	1.33333	7	7	0.4	7	0.4	7	0.5	3	5.66667	1.33333	7	1.33333	7	1.33333	7	#DIV/0!	0	5.25	0.4	7	1.33333	7	1.33333	7	1.33333	7	1.33333	7	1.33333	7	1.33333	7	6.19048	1.33333	7	-1.33333	0.416667	-0.52381	-1.33333	-0.693452
LTRL590_290025300.1	LtrL590_29:852,799..853,797(-)	332	999	hypothetical protein, conserved	0	1	0	1	0	1	1	3	4	3	4	1	2	3.33333	#DIV/0!	2	#DIV/0!	2	#DIV/0!	2	2	3	2.25	3	4	1	2	2	3	0	1	0	1	0	1	1	2	1.85714	2	3	2.33333	1.08333	1.47619	0.333333	1.30655
LTRL590_180015400.1	LtrL590_18:424,514..425,857(+)	447	1344	Mitochondrial carrier protein, putative	0.5	6	0.666667	5	0.666667	5	5.33333	3	4	3	4	0.5	3	3.66667	1	6	1	6	1	6	1	6	6	3	4	1	6	1	6	1	6	1	6	1	6	1	6	5	1	4	-1.66667	-2.33333	-1.33333	-0.333333	-1.41667
LTRL590_260033200.1	LtrL590_26:1,054,822..1,055,616(+)	264	795	glutamate 5-kinase, putative	1	6	1.33333	7	1.33333	7	6.66667	0.6	8	0.6	8	0.6	8	8	1	8	1	8	1	8	1	8	8	0.6	8	1	8	1	8	1	8	1	8	1	8	1	8	7	0.5	6	1.33333	0	1	2	1.08333
LTRL590_180021200.1	LtrL590_18:728,940..729,581(+)	213	642	hypothetical protein, conserved	1	2	#DIV/0!	1	#DIV/0!	1	1.33333	1	4	1	4	1	2	3.33333	2	3	2	3	2	3	2	3	3	1	4	2	3	2	3	2	3	2	3	2	3	2	3	3	2	3	2	0.333333	0.333333	0.333333	0.75
LTRL590_040015600.1	LtrL590_04:397,169..397,558(-)	129	390	hypothetical protein, conserved	#DIV/0!	1	#DIV/0!	0	#DIV/0!	0	0.333333	0.333333	4	0.333333	4	0	3	3.66667	0	2	0	2	0	2	0	2	2	0.333333	4	0	2	0	2	0	2	0	2	0	2	0	2	2	0	2	3.33333	1.66667	1.66667	1.66667	2.08333
LTRL590_110012100.1	LtrL590_11:193,990..194,388(+)	132	399	hypothetical protein, conserved	#DIV/0!	0	0	1	#DIV/0!	0	0.333333	0	4	0	4	0	3	3.66667	0	2	0	2	0	2	0	2	2	0	4	0	2	0	2	0	2	0	2	0	2	0	2	2	0	2	3.33333	1.66667	1.66667	1.66667	2.08333
LTRL590_310037900.1	LtrL590_31:1,356,007..1,356,444(-)	145	438	ferredoxin, 2fe-2s-like protein	#DIV/0!	0	#DIV/0!	0	0	1	0.333333	1.5	5	1	4	0.333333	4	4.33333	0	2	0	2	0	2	0	2	2	1	4	0	2	0	2	0	2	0	2	0	2	0	2	2	0	2	4	2.33333	2.33333	2.33333	2.75
LTRL590_280027200.1	LtrL590_28:822,311..824,596(-)	761	2286	Leucine Rich repeat, putative	3	4	3	4	2	3	3.66667	2	3	2	3	4	5	3.66667	2	3	#DIV/0!	2	2	3	0	1	2.25	2	3	1.5	5	1	4	1	4	1.5	5	#DIV/0!	2	1	4	3.42857	#DIV/0!	2	0	1.41667	0.238095	1.66667	0.830357
LTRL590_170007200.1	LtrL590_17:103,010..103,543(-)	177	534	histone H2A, putative	#DIV/0!	1	#DIV/0!	0	#DIV/0!	0	0.333333	0	2	0	2	0	2	2	0	2	0	2	0	2	0	3	2.25	0	2	0	2	0	2	0	2	0	2	0	2	0	2	1.71429	0	1	1.66667	-0.25	0.285714	1	0.675595
LTRL590_150007700.1	LtrL590_15:92,601..93,818(+)	405	1218	sterol carrier protein, putative	0	3	0	3	0.333333	4	3.33333	0	3	0	3	0	2	2.66667	0	4	0	4	0	4	0	4	4	0	3	0	4	0	4	0	4	0	4	0	4	0	4	3.28571	0	2	-0.666667	-1.33333	-0.619048	0.666667	-0.488095
LTRL590_360082000.1	LtrL590_36:2,663,831..2,664,310(-)	159	480	Thioesterase superfamily, putative	#DIV/0!	1	#DIV/0!	1	#DIV/0!	1	1	0	1	0	1	0	2	1.33333	0	2	0	2	0	2	0.5	3	2.25	0	1	0.5	3	0.5	3	0.5	3	0.5	3	0.5	3	0.5	3	2.35714	0.5	3	0.333333	-0.916667	-1.02381	-1.66667	-0.818452
LTRL590_350028200.1	LtrL590_35:847,250..848,647(+)	465	1398	hypothetical protein, conserved	0.6	8	0.6	8	0.6	8	8	0	5	0	5	0	4	4.66667	0.6	8	0.6	8	0.6	8	0.5	6	7.5	0	5	0.6	8	0.5	6	0.6	8	0.6	8	0.6	8	0.6	8	6.22857	0.6	8	-3.33333	-2.83333	-1.5619	-3.33333	-2.76548
LTRL590_250022900.1	LtrL590_25:640,226..641,782(-)	518	1557	casein kinase I, putative	1.33333	7	1	6	1	8	7	0	2	0	2	0	3	2.33333	0.75	7	0.75	7	0	1	1	8	5.75	0	2	0.75	7	0.75	7	0.75	7	0.75	7	0.75	7	0.75	7	5.39286	0.75	7	-4.66667	-3.41667	-3.05952	-4.66667	-3.95238
LTRL590_260005700.1	LtrL590_26:17,284..18,093(-)	269	810	hypothetical protein, conserved	7	8	7	8	7	8	8	1.25	9	1.25	9	2	9	9	3.5	9	3.5	9	3.5	9	1	2	7.25	1.25	9	3.5	9	1	2	3.5	9	3.5	9	3.5	9	3.5	9	7.21429	3.5	9	1	1.75	1.78571	0	1.13393
LTRL590_210009400.1	LtrL590_21:120,865..121,938(+)	357	1074	PD-(D/E)XK nuclease superfamily, putative	0	3	0.5	6	0	3	4	4	5	4	5	2	3	4.33333	0.666667	5	0.666667	5	0.666667	5	0.666667	5	5	4	5	0.666667	5	0.666667	5	0.666667	5	0.666667	5	0.666667	5	0.666667	5	4.38095	2	3	0.333333	-0.666667	-0.047619	1.33333	0.238095
LTRL590_210006100.1	LtrL590_21:24,932..26,305(+)	457	1374	Major Facilitator Superfamily, putative	2	3	2	3	2	3	3	0.25	5	0.25	5	0.333333	4	4.66667	0.666667	5	0.666667	5	0.666667	5	0.666667	5	5	0.25	5	0.666667	5	0.666667	5	0.666667	5	0.666667	5	0.666667	5	0.666667	5	4.38095	1	4	1.66667	-0.333333	0.285714	0.666667	0.571429
LTRL590_230026300.1	LtrL590_23:750,584..751,885(+)	433	1302	protoheme IX farnesyltransferase, putative	0.142857	8	0	3	0	7	6	0.2	6	0.2	6	0.25	5	5.66667	0.333333	8	0.333333	8	0.333333	8	0.333333	8	8	0.2	6	0.333333	8	0.333333	8	0.333333	8	0.333333	8	0.333333	8	0.333333	8	6.61905	0.4	7	-0.333333	-2.33333	-0.952381	-1.33333	-1.2381
LTRL590_230006300.1	LtrL590_23:38,613..39,191(+)	192	579	cyclophilin 3, putative	0.25	5	0.333333	4	0.333333	4	4.33333	0.166667	7	0.166667	7	0.25	5	6.33333	0.2	6	0.2	6	0.2	6	0	2	5	0.166667	7	0.2	6	0.2	6	0	2	0	2	0	2	0.2	6	4.14286	0.2	6	2	1.33333	2.19048	0.333333	1.46429
LTRL590_360068800.1	LtrL590_36:2,223,213..2,224,181(-)	322	969	hypothetical protein, conserved	0.333333	4	0.333333	4	0.333333	4	4	0.25	5	0.25	5	0.666667	10	6.66667	0.333333	4	0.333333	4	0.333333	4	0.4	7	4.75	0.25	5	0.4	7	0.4	7	0.4	7	0.4	7	0.4	7	0.4	7	5.77143	0.333333	4	2.66667	1.91667	0.895238	2.66667	2.03631
LTRL590_360026000.1	LtrL590_36:767,201..768,580(-)	459	1380	T-lymphocyte triggering factor, putative	0.5	3	0.5	3	0.333333	4	3.33333	2	3	2	3	1.66667	8	4.66667	0.333333	4	0.333333	4	0.333333	4	0.333333	4	4	2	3	0.333333	4	0.333333	4	0.333333	4	0.333333	4	0.333333	4	0.333333	4	3.33333	1	2	1.33333	0.666667	1.33333	2.66667	1.5
LTRL590_020010000.1	LtrL590_02:210,900..211,778(-)	292	879	amino acid permease, putative	3	8	1.75	11	2.33333	10	9.66667	5	12	5	12	#DIV/0!	4	9.33333	2.66667	11	2.66667	11	2.66667	11	2.66667	11	11	5	12	2.66667	11	2.66667	11	2.66667	11	2.66667	11	3.5	9	2.66667	11	9.66667	3.5	9	-0.333333	-1.66667	-0.333333	0.333333	-0.5
LTRL590_240019400.1	LtrL590_24:482,392..482,649(+)	85	258	hypothetical protein, conserved	#DIV/0!	2	1	4	1	4	3.33333	0.5	3	0.5	3	#DIV/0!	1	2.33333	1	4	1	4	1	4	1	4	4	0.5	3	1	4	1	4	1	4	1	4	#DIV/0!	0	1	4	2.85714	#DIV/0!	2	-1	-1.66667	-0.52381	0.333333	-0.714286
LTRL590_100012900.1	LtrL590_10:262,825..263,403(-)	192	579	hypothetical protein, conserved	1	4	1	2	1	4	3.33333	1	2	1	2	1	2	2	1	4	1	4	1	4	0.75	7	4.75	1	2	0.75	7	0.75	7	0.75	7	0.75	7	0.75	7	0.5	6	5.25	1	4	-1.33333	-2.75	-3.25	-2	-2.33333
LTRL590_220007800.1	LtrL590_22:114,121..114,525(-)	134	405	hypothetical protein, conserved	#DIV/0!	2	#DIV/0!	3	#DIV/0!	2	2.33333	0.25	5	0.25	5	5	6	5.33333	0	2	0	2	0	2	1	4	2.5	0.25	5	1	4	1	4	1	4	1	4	1	4	1	4	3.71429	1	4	3	2.83333	1.61905	1.33333	2.19643
LTRL590_350014900.1	LtrL590_35:348,784..349,917(+)	377	1134	aldose 1-epimerase-like protein	2	6	2	6	2	6	6	2	3	2	3	0.333333	8	4.66667	1.66667	8	1.66667	8	1.66667	8	2.5	7	7.75	2	3	1.66667	8	3	8	1.66667	8	1.66667	8	2.5	7	1.66667	8	6.2381	2	6	-1.33333	-3.08333	-1.57143	-1.33333	-1.83036
LTRL590_340019900.1	LtrL590_34:565,959..566,999(-)	346	1041	hypothetical protein, conserved	0.8	9	1	8	1	8	8.33333	0.75	7	0.75	7	0.6	8	7.33333	1.33333	7	1.33333	7	1.33333	7	1.2	11	8	0.75	7	1.2	11	1.2	11	1.2	11	1.2	11	1.2	11	1.2	11	9.02857	1.33333	7	-1	-0.666667	-1.69524	0.333333	-0.757143
LTRL590_320018500.1	LtrL590_32:477,383..478,207(+)	274	825	proteasome regulatory non-ATP-ase subunit, putative	0	3	0	2	0	1	2	0	2	0	2	0	3	2.33333	0	3	0	3	0	3	0	3	3	0	2	0	3	0	3	0	3	0	3	0	3	0	3	2.42857	0	1	0.333333	-0.666667	-0.0952381	1.33333	0.22619
LTRL590_320026600.1	LtrL590_32:784,507..785,937(-)	476	1431	hypothetical protein, conserved	2.25	13	2	12	1.8	14	13	0.75	14	0.75	14	0.3	13	13.6667	1.8	14	1.8	14	1.8	14	1.8	14	14	0.75	14	1.8	14	1.8	14	2	15	2	15	2	15	1.8	14	12.5714	2	12	0.666667	-0.333333	1.09524	1.66667	0.77381
LTRL590_270012900.1	LtrL590_27:299,772..300,104(+)	110	333	Stress responsive A/B Barrel Domain, putative	0	1	0	1	0	1	1	1	2	1	2	1	2	2	0	3	0	3	0	3	0	3	3	1	2	0	3	0	3	0	3	0	3	0	3	0	3	2.42857	0	2	1	-1	-0.428571	0	-0.107143
LTRL590_250029200.1	LtrL590_25:828,695..830,032(+)	445	1338	hypothetical protein, conserved	0.8	9	0.8	9	1	10	9.33333	0.222222	11	0.222222	11	0.142857	8	10	0.666667	10	0.666667	10	0	2	0.666667	10	8	0.222222	11	0.666667	10	0.666667	10	0.666667	10	0.666667	10	0.666667	10	0.666667	10	8.80952	0.666667	10	0.666667	2	1.19048	0	0.964286
LTRL590_140013600.1	LtrL590_14:322,736..323,233(-)	165	498	fatty acid elongase, putative	3	4	1	2	5	6	4	1	2	1	2	1	2	2	2	3	2	3	3	4	2	3	3.25	1	2	2	3	2	3	2	3	2	3	2	3	2	3	2.71429	#DIV/0!	2	-2	-1.25	-0.714286	0	-0.991071
LTRL590_160023800.1	LtrL590_16:706,143..706,949(+)	268	807	prohibitin	0.333333	4	0	2	0	4	3.33333	0	4	0	4	0.5	3	3.66667	0	4	0	4	0	4	0	4	4	0	4	0	4	0	4	0	4	0	4	0	4	0	4	3.42857	0	2	0.333333	-0.333333	0.238095	1.66667	0.47619
LTRL590_320037300.1	LtrL590_32:1,181,147..1,182,961(-)	604	1815	hypothetical protein, conserved	1.66667	8	1	6	1	6	6.66667	0.666667	5	0.666667	5	0.333333	4	4.66667	1	8	1	8	1	8	1	8	8	0.666667	5	1	8	1	8	1	8	1	8	1	8	1	8	6.57143	1	6	-2	-3.33333	-1.90476	-1.33333	-2.14286
LTRL590_280025300.1	LtrL590_28:748,987..749,664(-)	225	678	methylthioribulose-1-phosphate dehydratase, putative	0.333333	8	0.166667	7	0.166667	7	7.33333	0	4	0	4	0	3	3.66667	0.142857	8	0.142857	8	0.142857	8	0	1	6.25	0	4	0.142857	8	0.142857	8	0.142857	8	0.142857	8	0.142857	8	0.142857	8	6.30612	0.142857	8	-3.66667	-2.58333	-2.63946	-4.33333	-3.3057
LTRL590_250007000.1	LtrL590_25:40,623..41,012(-)	129	390	DNA-directed RNA polymerase I subunit, putative	#DIV/0!	0	#DIV/0!	0	0	1	0.333333	1	2	1	2	0.5	3	2.33333	0	2	0	2	#DIV/0!	0	0	2	1.5	1	2	0	2	0	2	0	2	0	2	0	2	0	2	1.71429	#DIV/0!	0	2	0.833333	0.619048	2.33333	1.44643
LTRL590_330023400.1	LtrL590_33:662,262..663,242(+)	326	981	3-ketoacyl-CoA reductase, putative	0.5	6	0.25	5	0.25	5	5.33333	0.6	8	0.8	9	0.75	7	8	0.6	8	0.6	8	0.6	8	3	4	7	0.8	9	0.6	8	0.6	8	0.6	8	0.6	8	0.6	8	0.6	8	7.08571	0.4	7	2.66667	1	0.914286	1	1.39524
LTRL590_360071200.1	LtrL590_36:2,310,470..2,311,723(-)	417	1254	choline/ethanolamine phosphotransferase (CEPT), putative	0	2	0	2	0	2	2	0	1	#DIV/0!	0	#DIV/0!	0	0.333333	#DIV/0!	0	#DIV/0!	0	#DIV/0!	0	0	2	0.5	#DIV/0!	0	0	2	0	2	0	2	0	2	#DIV/0!	0	#DIV/0!	0	0.857143	#DIV/0!	0	-1.66667	-0.166667	-0.52381	0.333333	-0.505952
LTRL590_030006300.1	LtrL590_03:37,038..37,973(+)	311	936	hypothetical protein, conserved	0	5	0	5	0	5	5	0	3	0	3	0	2	2.66667	0.2	6	0.2	6	0.2	6	0	5	5.75	0	3	0	5	0	5	0	5	0	5	0	5	0	5	4	0	4	-2.33333	-3.08333	-1.33333	-1.33333	-2.02083
LTRL590_050005200.1	LtrL590_05:8,623..9,210(+)	195	588	ras-like small GTPases, putative	0	1	#DIV/0!	0	0	2	1	0	2	0	2	0	3	2.33333	0.5	3	0.5	3	0.5	3	#DIV/0!	0	2.25	0	2	0.5	3	0.5	3	0.5	3	0.5	3	0.5	3	0.5	3	2.5	0.5	3	1.33333	0.0833333	-0.166667	-0.666667	0.145833
LTRL590_280017600.1	LtrL590_28:449,406..450,011(+)	201	606	vacuolar type h+ ATPase subunit, putative	0.5	6	0.5	6	0.5	6	6	0.333333	4	0.333333	4	0	3	3.66667	0.5	6	0.5	6	0.5	6	#DIV/0!	0	4.5	0.333333	4	0.5	6	0.5	6	0.5	6	0.5	6	0.5	6	0.5	6	4.92857	1	4	-2.33333	-0.833333	-1.2619	-0.333333	-1.19048
LTRL590_250022500.1	LtrL590_25:618,693..620,945(-)	750	2253	mitochondrial RNA binding complex 1 subunit, putative	0.333333	8	0	6	0.4	7	7	0.5	6	0.5	6	0.8	9	7	0.428571	10	0.428571	10	1	4	0.428571	10	8.5	0.5	6	0.428571	10	0.428571	10	0.428571	10	0.428571	10	0.428571	10	0.428571	10	8.06122	0.285714	9	0	-1.5	-1.06122	-2	-1.14031
LTRL590_300018700.1	LtrL590_30:428,337..429,578(+)	413	1242	calcium-binding protein, putative	#DIV/0!	1	#DIV/0!	0	0	1	0.666667	#DIV/0!	1	#DIV/0!	1	0	1	1	1	2	1	2	1	2	#DIV/0!	1	1.75	#DIV/0!	1	1	2	1	2	1	2	1	2	1	2	1	2	1.71429	#DIV/0!	0	0.333333	-0.75	-0.714286	1	-0.0327381
LTRL590_280028100.1	LtrL590_28:854,574..854,987(-)	137	414	DNA-directed RNA polymerase-like protein	0.666667	5	0.666667	5	0.5	6	5.33333	#DIV/0!	0	#DIV/0!	0	#DIV/0!	0	0	0.666667	5	0.666667	5	0.666667	5	#DIV/0!	0	3.75	#DIV/0!	0	0.666667	5	0.666667	5	0.666667	5	0.666667	5	0.666667	5	0.666667	5	3.66667	0.666667	5	-5.33333	-3.75	-3.66667	-5	-4.4375
LTRL590_280037100.1	LtrL590_28:1,168,630..1,169,640(-)	336	1011	hypothetical protein, conserved	1.5	5	1.5	5	1.5	5	5	1	4	1	4	0	2	3.33333	1.5	5	1.5	5	1.5	5	#DIV/0!	0	3.75	1	4	1.5	5	1.5	5	1.5	5	1.5	5	1.5	5	1.5	5	4.35714	0.5	3	-1.66667	-0.416667	-1.02381	0.333333	-0.693452
LTRL590_150019900.1	LtrL590_15:551,558..552,775(-)	405	1218	Putative papain-like cysteine peptidase (DUF1796), putative	0.25	5	0.5	3	0.333333	4	4	1	8	1	8	0.5	9	8.33333	0.5	6	0.5	6	0.5	6	0.5	6	6	1	8	0.5	6	0.5	6	0.5	6	0.5	6	0.5	6	0.5	6	5.5	0.25	5	4.33333	2.33333	2.83333	3.33333	3.20833
LTRL590_250024200.1	LtrL590_25:684,378..684,773(-)	131	396	LSM domain containing protein, putative	0	2	0	2	0	2	2	1	4	1	4	0.5	3	3.66667	0.333333	4	0.333333	4	1	2	0.333333	4	3.5	1	4	0	3	0	3	0	3	0	3	0.333333	4	0.333333	4	3	0.333333	4	1.66667	0.166667	0.666667	-0.333333	0.541667
LTRL590_150009000.1	LtrL590_15:140,105..140,434(+)	109	330	60S acidic ribosomal protein, putative	0	1	0	1	#DIV/0!	0	0.666667	0	1	#DIV/0!	0	0.5	3	1.33333	0	3	0	3	0	3	0	1	2.5	#DIV/0!	0	0	3	0	1	0	1	0.25	5	0	4	0	1	2	0	1	0.666667	-1.16667	-0.666667	0.333333	-0.208333
LTRL590_310021800.1	LtrL590_31:651,571..652,323(-)	251	753	hypothetical protein, conserved	#DIV/0!	1	#DIV/0!	1	#DIV/0!	1	1	0.5	3	0.5	3	1	4	3.33333	0.5	3	0.5	3	0.5	3	0.5	3	3	0.5	3	0.5	3	0.5	3	0.5	3	0.5	3	1	2	0.5	3	2.5	1	2	2.33333	0.333333	0.833333	1.33333	1.20833
LTRL590_340048100.1	LtrL590_34:1,603,473..1,604,138(+)	221	666	hypothetical protein, conserved	0	1	#DIV/0!	0	1	2	1	0.5	3	0.5	3	1	2	2.66667	#DIV/0!	0	#DIV/0!	0	#DIV/0!	0	1	2	0.5	0.5	3	1	2	1	2	1	2	1	2	1	2	1	2	2	#DIV/0!	0	1.66667	2.16667	0.666667	2.66667	1.79167
LTRL590_130015900.1	LtrL590_13:390,120..390,728(-)	202	609	calmodulin, putative	0.666667	5	0.333333	4	0.333333	4	4.33333	0	1	0	1	#DIV/0!	2	1.33333	0	3	0	3	0	3	0	3	3	0	1	0	3	0	3	0	3	0	3	0	3	0	3	2.28571	0	3	-3	-1.66667	-0.952381	-1.66667	-1.82143
LTRL590_320021800.1	LtrL590_32:606,195..606,974(-)	259	780	hypothetical protein, conserved	2.5	7	5	6	2.5	7	6.66667	1	8	1	8	0.25	5	7	3	8	3	8	3	8	3	8	8	1	8	3	8	3	8	3	8	3	8	3	8	3	8	7.28571	5	6	0.333333	-1	-0.285714	1	0.0119048
LTRL590_360032200.1	LtrL590_36:987,132..988,148(+)	338	1017	hypothetical protein, conserved	0.25	5	0.333333	4	0.333333	4	4.33333	#DIV/0!	1	#DIV/0!	1	0.5	3	1.66667	0	3	0	3	0	3	0	3	3	#DIV/0!	1	0	3	0	3	0	3	0	3	0	3	0	3	2.28571	0	3	-2.66667	-1.33333	-0.619048	-1.33333	-1.4881
LTRL590_360031400.1	LtrL590_36:955,893..957,128(+)	411	1236	short-chain dehydrogenase, putative	#DIV/0!	1	#DIV/0!	2	#DIV/0!	2	1.66667	0.8	9	0.8	9	0.5	3	7	2	3	2	3	2	3	2	3	3	0.8	9	2	3	2	3	2	3	2	3	2	3	2	3	3.71429	2	3	5.33333	4	3.28571	4	4.15476
LTRL590_000006900.1	LTRL590_SCAF000022:2,474..3,376(+)	300	903	hypothetical protein, conserved	0.333333	4	0.333333	4	0.666667	5	4.33333	0.4	7	0.4	7	0.75	7	7	0.75	7	0.5	6	0.5	6	0.5	6	6.25	0.4	7	0.5	6	0.5	6	0.5	6	0.5	6	0.5	6	0.5	6	5.35714	0.5	6	2.66667	0.75	1.64286	1	1.51488
LTRL590_350035400.1	LtrL590_35:1,131,191..1,132,870(-)	559	1680	DENN (AEX-3) domain containing protein, putative	1.25	9	1	8	1	8	8.33333	0.333333	4	0.333333	4	0.25	5	4.33333	1	8	1	8	1	8	1	8	8	0.333333	4	1	8	1	8	1	8	1	8	1	8	1	8	6.42857	1	8	-4	-3.66667	-2.09524	-3.66667	-3.35714
LTRL590_250018400.1	LtrL590_25:467,993..469,570(-)	525	1578	ATPase beta subunit, putative	0.333333	4	0.333333	4	1	2	3.33333	0	1	0	1	0	1	1	0.5	3	0	1	0	1	1	2	1.75	0	1	0	2	1	2	0.5	3	0.5	3	#DIV/0!	0	#DIV/0!	1	1.35714	0	2	-2.33333	-0.75	-0.357143	-1	-1.11012
LTRL590_310032300.1	LtrL590_31:1,134,541..1,135,395(-)	284	855	prostaglandin f2-alpha synthase/D-arabinose dehydrogenase	#DIV/0!	0	#DIV/0!	0	#DIV/0!	0	0	2	3	1	2	1	2	2.33333	1	2	1	2	#DIV/0!	1	1	2	1.75	1	2	1	2	1	2	1	2	1	2	1	2	1	2	1.85714	#DIV/0!	1	2.33333	0.583333	0.47619	1.33333	1.18155
LTRL590_180013000.1	LtrL590_18:329,125..329,415(+)	96	291	Zinc-finger double-stranded RNA-binding, putative	#DIV/0!	0	#DIV/0!	0	#DIV/0!	1	0.333333	0.333333	4	0.333333	4	0.5	3	3.66667	1	2	1	2	1	2	1	2	2	0.333333	4	1	2	1	2	1	2	1	2	1	2	1	2	2.14286	#DIV/0!	1	3.33333	1.66667	1.52381	2.66667	2.29762
LTRL590_360045800.1	LtrL590_36:1,411,415..1,412,416(-)	333	1002	cysteine synthase	0.5	6	0.5	6	0.5	6	6	0	5	0	5	0.166667	7	5.66667	0.333333	8	0.333333	8	0.333333	8	0.333333	8	8	0	5	0.333333	8	0.333333	8	0.333333	8	0.333333	8	0.333333	8	0.333333	8	6.47619	0.4	7	-0.333333	-2.33333	-0.809524	-1.33333	-1.20238
LTRL590_170007600.1	LtrL590_17:115,715..116,698(-)	327	984	hypothetical protein, conserved	#DIV/0!	1	#DIV/0!	0	#DIV/0!	0	0.333333	3	4	3	4	2.5	7	5	1	2	1	2	1	2	1	2	2	3	4	1	2	1	2	1	2	1	2	1	2	1	2	2.14286	0	1	4.66667	3	2.85714	4	3.63095
LTRL590_250026400.1	LtrL590_25:750,955..751,998(-)	347	1044	hypothetical protein, conserved	0.666667	5	0.4	7	0.5	6	6	1.5	5	1.5	5	0.333333	4	4.66667	0.5	6	0.5	6	#DIV/0!	0	0.5	6	4.5	1.5	5	0.5	6	0.5	6	0.5	6	0.5	6	0.5	6	0.5	6	5.07143	1	4	-1.33333	0.166667	-0.404762	0.666667	-0.22619
LTRL590_130010200.1	LtrL590_13:176,383..177,291(+)	302	909	hypothetical protein, conserved	0.75	7	1	6	1	6	6.33333	3	4	3	4	1	4	4	0.75	7	0.75	7	0.75	7	0.75	7	7	3	4	0.75	7	0.75	7	0.75	7	0.75	7	0.75	7	0.75	7	5.67857	0.666667	5	-2.33333	-3	-1.67857	-1	-2.00298
LTRL590_130005500.1	LtrL590_13:11,630..13,015(-)	461	1386	hypothetical protein, conserved	1	8	1	8	1	8	8	1	6	1	6	1	6	6	1.25	9	1.25	9	1.25	9	1.25	9	9	1	6	1.25	9	1.25	9	1.25	9	1.25	9	1.25	9	1.25	9	7.46429	2.5	7	-2	-3	-1.46429	-1	-1.86607
LTRL590_220019800.1	LtrL590_22:571,247..571,981(+)	244	735	dephospho-CoA kinase, putative	0.25	5	0	6	0.2	6	5.66667	0.5	3	0.5	3	0	1	2.33333	0.166667	7	0.166667	7	0.166667	7	0.166667	7	7	0.5	3	0.166667	7	0.166667	7	0.166667	7	0.166667	7	0.166667	7	0.166667	7	5.45238	0.25	5	-3.33333	-4.66667	-3.11905	-2.66667	-3.44643
LTRL590_170019700.1	LtrL590_17:639,125..639,937(+)	270	813	otubain cysteine peptidase, Clan CA, family C65, putative	#DIV/0!	1	#DIV/0!	0	#DIV/0!	0	0.333333	0.333333	4	0.333333	4	0.5	6	4.66667	1	2	1	2	1	2	1	2	2	0.333333	4	1	2	1	2	1	2	1	2	1	2	1	2	2.14286	1	2	4.33333	2.66667	2.52381	2.66667	3.04762
LTRL590_320046200.1	LtrL590_32:1,492,641..1,493,315(+)	224	675	Tetratricopeptide repeat, putative	0.25	5	0	3	0	3	3.66667	0	3	0	3	0.333333	4	3.33333	0	2	0	2	0	2	0	2	2	0	3	0	2	0	2	0	2	0	2	0	2	0	2	1.85714	0	2	-0.333333	1.33333	1.47619	1.33333	0.952381
LTRL590_210023700.1	LtrL590_21:655,540..656,727(-)	395	1188	hypothetical protein, conserved	0	5	0	4	0	5	4.66667	2	3	2	3	#DIV/0!	2	2.66667	0	3	0	3	0	3	0	3	3	2	3	0	4	0	3	0	3	0	3	0	3	0	4	2.85714	0	3	-2	-0.333333	-0.190476	-0.333333	-0.714286
LTRL590_310025200.1	LtrL590_31:831,465..832,025(-)	186	561	GINS complex subunit Psf3, putative	#DIV/0!	1	#DIV/0!	1	#DIV/0!	2	1.33333	0.666667	5	0.666667	5	0.666667	5	5	2	3	2	3	2	3	2	3	3	0.666667	5	2	3	2	3	2	3	2	3	2	3	2	3	3.14286	2	3	3.66667	2	1.85714	2	2.38095
LTRL590_240005300.1	LtrL590_24:5,136..5,636(+)	166	501	hypothetical protein, conserved	0	1	#DIV/0!	0	#DIV/0!	0	0.333333	0.666667	5	0.666667	5	0.5	3	4.33333	0	2	0	2	0	2	0	2	2	0.666667	5	0	2	0	2	0	2	0	2	0	2	0	2	2.14286	0	2	4	2.33333	2.19048	2.33333	2.71429
LTRL590_000007000.1	LTRL590_SCAF000022:4,098..5,354(+)	418	1257	mitochondrial RNA ligase 2	0.25	5	0.333333	4	0.333333	4	4.33333	0.5	3	0.5	3	0	3	3	0.2	6	0.2	6	0.2	6	0.2	6	6	0.5	3	0.2	6	0.2	6	0.2	6	0.2	6	0.2	6	0.2	6	4.74286	0.2	6	-1.33333	-3	-1.74286	-3	-2.26905
LTRL590_150021900.1	LtrL590_15:602,427..603,587(-)	386	1161	protein kinase, putative	0.555556	14	0.428571	10	0.571429	11	11.6667	0.666667	10	0.666667	10	1	8	9.33333	0.333333	12	0.333333	12	0.333333	12	0.333333	12	12	0.666667	10	0.333333	12	0.333333	12	0.333333	12	0.333333	12	0.333333	12	0.333333	12	10.0476	0.375	11	-2.33333	-2.66667	-0.714286	-1.66667	-1.84524
LTRL590_270029100.1	LtrL590_27:972,798..973,976(-)	392	1179	NLI interacting factor-like phosphatase, putative	0.666667	5	0.333333	4	0.75	7	5.33333	0	5	0	5	0.5	9	6.33333	0.166667	7	0.166667	7	0.166667	7	0.166667	7	7	0	5	0.166667	7	0.166667	7	0.166667	7	0.166667	7	0.166667	7	0.166667	7	5.7381	0.166667	7	1	-0.666667	0.595238	-0.666667	0.0654762
LTRL590_150007300.1	LtrL590_15:84,429..85,553(-)	374	1125	protein phosphatase 1 catalitic subunit, putative	0.2	6	0.2	6	0.2	6	6	0.25	5	0.25	5	0.333333	4	4.66667	0.142857	8	0.142857	8	0.142857	8	0.142857	8	8	0.25	5	0.142857	8	0.142857	8	0.142857	8	0.142857	8	0.142857	8	0.142857	8	6.44898	0.166667	7	-1.33333	-3.33333	-1.78231	-2.33333	-2.19558
LTRL590_270033200.1	LtrL590_27:1,101,885..1,102,655(+)	256	771	peptidyl dipeptidase, putative	2	6	2	3	#DIV/0!	2	3.66667	0.833333	11	0.833333	11	0	3	8.33333	0.25	5	0.25	5	0.5	6	0.5	3	4.75	0.833333	11	0	4	0.666667	5	0.25	5	0.333333	4	0.333333	4	0.25	5	4.75	0	3	4.66667	3.58333	3.58333	5.33333	4.29167
LTRL590_240025900.1	LtrL590_24:700,259..701,095(-)	278	837	lysophospholipase, putative	0	2	0	2	0	3	2.33333	2	3	2	3	3	4	3.33333	0	3	0	3	0	3	0	3	3	2	3	0	3	0	3	0	3	0	3	0	3	0	3	2.57143	0	1	1	0.333333	0.761905	2.33333	1.10714
LTRL590_320012600.1	LtrL590_32:250,360..251,064(+)	234	705	ubiquitin carrier protein 4, putative	0	3	0	3	0	4	3.33333	0	5	0	5	0	5	5	0	4	0	4	0	4	0	4	4	0	5	0	4	0	4	0	4	0	4	0	4	0	4	3.57143	0	2	1.66667	1	1.42857	3	1.77381
LTRL590_340030900.1	LtrL590_34:1,008,401..1,009,852(+)	483	1452	ATP-dependent DNA helicase, putative	0.142857	8	0.2	6	0.166667	7	7	0.333333	4	0.333333	4	0.333333	4	4	0.2	6	0.2	6	0.2	6	0.2	6	6	0.333333	4	0.2	6	0.2	6	0.2	6	0.2	6	0.2	6	0.2	6	4.88571	0.2	6	-3	-2	-0.885714	-2	-1.97143
LTRL590_180005600.1	LtrL590_18:15,812..16,285(-)	157	474	hypothetical protein, conserved	0.166667	7	0.2	6	0.2	6	6.33333	0	1	0	1	0	2	1.33333	0.166667	7	0.166667	7	0.166667	7	0.166667	7	7	0	1	0.166667	7	0.166667	7	0.166667	7	0.166667	7	0.166667	7	0.166667	7	5.16667	0.166667	7	-5	-5.66667	-3.83333	-5.66667	-5.04167
LTRL590_260025600.1	LtrL590_26:764,058..764,342(+)	94	285	hypothetical protein, conserved	#DIV/0!	0	#DIV/0!	0	#DIV/0!	0	0	0	1	0	1	0	4	2	0	2	0	2	0	2	0	2	2	0	1	0	2	0	2	0	2	0	2	0	2	0	2	1.57143	0	1	2	0	0.428571	1	0.857143
LTRL590_040006800.1	LtrL590_04:57,125..57,673(+)	182	549	surface antigen-like protein	3	4	3	4	3	4	4	2	3	2	3	0.5	3	3	4	5	4	5	4	5	4	5	5	2	3	4	5	4	5	4	5	4	5	4	5	4	5	4.57143	2	3	-1	-2	-1.57143	0	-1.14286
LTRL590_130021300.1	LtrL590_13:609,356..611,542(-)	728	2187	MCAK-like kinesin, putative	0	7	0	5	0	6	6	1	6	1	6	3	4	5.33333	0	5	0	5	0	5	0	5	5	1	6	0	5	0	5	0	4	0	5	0	5	0	5	4.42857	0	4	-0.666667	0.333333	0.904762	1.33333	0.47619
LTRL590_270026400.1	LtrL590_27:859,634..860,056(-)	140	423	hypothetical protein, conserved	0	2	0	2	0	2	2	0	3	0	3	0	2	2.66667	0	3	0	3	0	3	0	3	3	0	3	0	3	0	3	0	3	0	3	0	3	0	3	2.57143	0	1	0.666667	-0.333333	0.0952381	1.66667	0.52381
LTRL590_260028900.1	LtrL590_26:901,846..902,229(+)	127	384	60S ribosomal protein L35, putative	#DIV/0!	0	0	1	1	2	1	0	2	0	2	0	1	1.66667	0	2	0	2	0	2	0	2	2	0	2	0	2	0	1	0	2	0	2	0	2	0	2	1.57143	#DIV/0!	0	0.666667	-0.333333	0.0952381	1.66667	0.52381
LTRL590_060013800.1	LtrL590_06:363,049..363,747(+)	232	699	hypothetical protein, conserved	1	2	1	2	1	2	2	#DIV/0!	1	#DIV/0!	1	#DIV/0!	1	1	2	3	2	3	2	3	2	3	3	#DIV/0!	1	2	3	2	3	2	3	2	3	2	3	2	3	2.57143	#DIV/0!	1	-1	-2	-1.57143	0	-1.14286
LTRL590_030010900.1	LtrL590_03:216,811..217,809(+)	332	999	quinone oxidoreductase, putative	0	1	0	2	0.5	3	2	0.5	6	0.5	6	0.333333	4	5.33333	0	1	0	1	0	1	0	1	1	0.5	6	0	1	0	1	0	1	0	1	0	1	0	1	1.57143	#DIV/0!	0	3.33333	4.33333	3.7619	5.33333	4.19048
LTRL590_280017100.1	LtrL590_28:428,688..429,452(+)	254	765	hypothetical protein, conserved	1	6	1.5	5	1	6	5.66667	1.5	10	1.5	10	1	8	9.33333	1.5	5	1.5	5	1.5	5	#DIV/0!	0	3.75	1.5	10	1.5	5	2.5	7	1.5	5	1.5	5	1.5	5	1.5	5	5.5	1.5	5	3.66667	5.58333	3.83333	4.33333	4.35417
LTRL590_340018100.1	LtrL590_34:503,355..504,836(-)	493	1482	Dihydrouridine synthase (Dus), putative	0.571429	11	0.8	9	0.8	9	9.66667	0.8	9	0.8	9	0.5	9	9	1	8	1	8	1	8	0.714286	12	9	0.8	9	0.714286	12	0.714286	12	0.714286	12	0.714286	12	0.714286	12	0.714286	12	9.95918	1	8	-0.666667	0	-0.959184	1	-0.156463
LTRL590_280035500.1	LtrL590_28:1,109,656..1,111,209(-)	517	1554	Beta-lactamase, putative	0.285714	9	0.285714	9	0.428571	10	9.33333	0.25	5	0.25	5	0	2	4	0.428571	10	0.428571	10	0.428571	10	#DIV/0!	0	7.5	0.25	5	0.428571	10	0.428571	10	0.428571	10	0.428571	10	0.428571	10	0.428571	10	7.91837	0.5	9	-5.33333	-3.5	-3.91837	-5	-4.43793
LTRL590_350051100.1	LtrL590_35:1,682,289..1,683,242(+)	317	954	mitochondrial phosphate transporter, putative	1	4	0	2	0	2	2.66667	0	1	1	4	1.5	5	3.33333	#DIV/0!	0	0	1	#DIV/0!	0	0	2	0.75	1	4	0	1	0	1	1	4	0.666667	5	#DIV/0!	0	0	1	1.85714	#DIV/0!	1	0.666667	2.58333	1.47619	2.33333	1.76488
LTRL590_260028300.1	LtrL590_26:885,916..886,755(+)	279	840	nitrilase, putative	0.5	3	1	4	0.5	3	3.33333	0	4	0	4	0	5	4.33333	0	5	0.2	6	0	5	0	5	5.25	0	4	0	5	0	5	0	5	0	5	0	5	0	5	4.14286	0	5	1	-0.916667	0.190476	-0.666667	-0.0982143
LTRL590_280018000.1	LtrL590_28:459,661..461,187(+)	508	1527	copine i-like protein	0.4	7	0.4	7	0.333333	8	7.33333	0	6	0	6	0	4	5.33333	0.4	7	0.4	7	0.4	7	#DIV/0!	0	5.25	0	6	0.4	7	0.4	7	0.4	7	0.4	7	0.4	7	0.4	7	5.91429	0.2	6	-2	0.0833333	-0.580952	-0.666667	-0.791071
LTRL590_360016500.1	LtrL590_36:419,371..420,231(+)	286	861	Flagellar C1a complex subunit C1a-32, putative	#DIV/0!	0	#DIV/0!	0	#DIV/0!	1	0.333333	1.5	5	1.5	5	1	4	4.66667	0	1	0	1	0	1	1	2	1.25	1.5	5	1	2	1	2	1	2	1	2	1	2	1	2	2.28571	1	2	4.33333	3.41667	2.38095	2.66667	3.1994
LTRL590_280031100.1	LtrL590_28:953,394..954,128(+)	244	735	hypothetical protein, conserved	0	2	0	2	0	2	2	0	1	0	1	0	2	1.33333	0	2	0	2	0	2	#DIV/0!	0	1.5	0	1	0	2	0	2	0	2	0	2	0	2	0	2	1.57143	#DIV/0!	0	-0.666667	-0.166667	-0.238095	1.33333	0.0654762
LTRL590_290007000.1	LtrL590_29:63,232..63,645(-)	137	414	Protein phosphatase inhibitor 2 (IPP-2), putative	#DIV/0!	0	#DIV/0!	0	#DIV/0!	0	0	0	1	0	1	#DIV/0!	1	1	0	2	0	2	0	2	#DIV/0!	0	1.5	0	1	0	2	0	2	0	2	0	2	0	2	0	2	1.57143	0	2	1	-0.5	-0.571429	-1	-0.267857
LTRL590_280007500.1	LtrL590_28:80,753..81,646(+)	297	894	NADH-ubiquinone oxidoreductase complex I, 21 kDa subunit, putative	0	6	0	6	0	6	6	1	2	0	1	0	2	1.66667	0	6	0	6	0	6	#DIV/0!	0	4.5	0	1	0	6	0	6	0	6	0	6	0	6	0	6	4.42857	0	4	-4.33333	-2.83333	-2.7619	-2.33333	-3.06548
LTRL590_130014500.1	LtrL590_13:336,832..337,932(-)	366	1101	hypothetical protein, conserved	0.4	7	0.5	6	0.75	7	6.66667	1	8	1	8	0.5	3	6.33333	0.4	7	0.4	7	0.4	7	0.4	7	7	1	8	0.4	7	0.4	7	0.4	7	0.4	7	0.4	7	0.4	7	6.2	0.666667	5	-0.333333	-0.666667	0.133333	1.33333	0.116667
LTRL590_280036400.1	LtrL590_28:1,143,815..1,144,972(-)	385	1158	hypothetical protein, conserved	1.66667	8	1.66667	8	1.66667	8	8	1	6	1	6	1.5	5	5.66667	2.66667	11	2.66667	11	2.66667	11	#DIV/0!	2	8.75	1	6	2.33333	10	2.33333	10	2.33333	10	2.33333	10	2.33333	10	2.33333	10	8.33333	2.33333	10	-2.33333	-3.08333	-2.66667	-4.33333	-3.10417
LTRL590_080006400.1	LtrL590_08:43,769..44,038(+)	89	270	hypothetical protein, conserved	1.5	5	1	6	1	6	5.66667	0.25	5	0.25	5	0	3	4.33333	1	6	1	6	1	6	1	6	6	0.25	5	1	6	1	6	1	6	1	6	1	6	1	6	5.14286	1	4	-1.33333	-1.66667	-0.809524	0.333333	-0.869048
LTRL590_280028700.1	LtrL590_28:869,022..871,322(+)	766	2301	Cullin family/Cullin protein neddylation domain containing protein, putative	1	10	1	10	0.833333	11	10.3333	#DIV/0!	3	#DIV/0!	3	1	10	5.33333	1.2	11	1.2	11	1.2	11	#DIV/0!	1	8.5	#DIV/0!	3	1.2	11	1.2	11	1.2	11	1.2	11	1.2	11	1.2	11	8.45714	1.25	9	-5	-3.16667	-3.12381	-3.66667	-3.73929
LTRL590_320012200.1	LtrL590_32:235,457..236,365(+)	302	909	hypothetical protein, conserved	0.333333	4	0.5	3	0.5	3	3.33333	1	4	1	4	3	4	4	0.25	5	0.25	5	0.25	5	0.25	5	5	1	4	0.333333	4	0.25	5	0.25	5	0.25	5	0.25	5	0.333333	4	3.89286	0.5	3	0.666667	-1	0.107143	1	0.193452
LTRL590_320011900.1	LtrL590_32:228,295..230,112(+)	605	1818	phosphatase, putative	0.4	7	0.5	6	0.5	6	6.33333	0.333333	8	0.333333	8	1	6	7.33333	0.333333	8	0.333333	8	0.333333	8	0.333333	8	8	0.333333	8	0.333333	8	0.333333	8	0.333333	8	0.333333	8	0.333333	8	0.333333	8	6.90476	0.2	6	1	-0.666667	0.428571	1.33333	0.52381
LTRL590_050012800.1	LtrL590_05:308,595..309,515(+)	306	921	methylthioadenosine phosphorylase, putative	1	2	1	2	1	2	2	1	4	1	4	1	4	4	0.5	3	0.5	3	0.5	3	1	2	2.75	1	4	0.5	3	1	4	0.5	3	0.5	3	0.5	3	0.5	3	2.92857	#DIV/0!	1	2	1.25	1.07143	3	1.83036
LTRL590_230017100.1	LtrL590_23:441,176..441,463(-)	95	288	hypothetical protein	#DIV/0!	1	#DIV/0!	1	#DIV/0!	1	1	0.5	3	0.5	3	0	2	2.66667	0.5	3	0.5	3	0.5	3	0.5	3	3	0.5	3	0.5	3	0.5	3	0.5	3	0.5	3	0.5	3	0.5	3	2.64286	1	2	1.66667	-0.333333	0.0238095	0.666667	0.505952
LTRL590_270024400.1	LtrL590_27:783,354..783,545(-)	63	192	hypothetical protein	#DIV/0!	1	#DIV/0!	1	#DIV/0!	1	1	0.5	3	0.5	3	#DIV/0!	2	2.66667	0.5	3	0.5	3	0.5	3	0.5	3	3	0.5	3	0.5	3	0.5	3	0.5	3	0.5	3	0.5	3	0.5	3	2.64286	0	2	1.66667	-0.333333	0.0238095	0.666667	0.505952
LTRL590_340049300.1	LtrL590_34:1,632,672..1,633,010(+)	112	339	ESSS subunit of NADH:ubiquinone oxidoreductase (complex I), putative	#DIV/0!	0	#DIV/0!	0	#DIV/0!	0	0	0.333333	4	0.5	3	0.5	3	3.33333	#DIV/0!	0	#DIV/0!	0	#DIV/0!	0	0	2	0.5	0.5	3	0	2	0	2	0	2	0	2	0	2	0	2	1.85714	#DIV/0!	0	3.33333	2.83333	1.47619	3.33333	2.74405
LTRL590_260023200.1	LtrL590_26:646,093..646,947(+)	284	855	methylated-DNA-[protein]-cysteine S-methyltransferase, putative	0.25	5	0.25	5	0.5	6	5.33333	5	6	5	6	1	6	6	0.4	7	0.4	7	0.4	7	0.4	7	7	5	6	0.4	7	0.4	7	0.4	7	0.4	7	0.4	7	0.4	7	5.91429	0.25	5	0.666667	-1	0.0857143	1	0.188095
LTRL590_220017700.1	LtrL590_22:505,827..507,734(-)	635	1908	Putative S-adenosyl-L-methionine-dependent methyltransferase, putative	0.714286	12	0.714286	12	0.714286	12	12	1.75	11	1.75	11	1.25	9	10.3333	0.714286	12	0.714286	12	0.714286	12	0.714286	12	12	1.75	11	0.714286	12	0.714286	12	0.714286	12	0.714286	12	0.714286	12	0.714286	12	10.2449	0.714286	12	-1.66667	-1.66667	0.0884354	-1.66667	-1.22789
LTRL590_320026300.1	LtrL590_32:774,028..774,999(-)	323	972	heat shock protein-like protein, putative	1.5	5	2	3	1	6	4.66667	0	5	0	5	0	6	5.33333	0.666667	5	0.666667	5	0.666667	5	0.666667	5	5	0	5	0.666667	5	0.666667	5	0.666667	5	0.666667	5	0.666667	5	0.666667	5	4.38095	2	3	0.666667	0.333333	0.952381	2.33333	1.07143
LTRL590_240019600.1	LtrL590_24:486,277..488,943(+)	888	2667	IQ calmodulin-binding motif containing protein, putative	1.14286	15	1	12	1.16667	13	13.3333	0.818182	20	0.727273	19	0.666667	15	18	1.14286	15	1.14286	15	1.14286	15	1.14286	15	15	0.727273	19	1.14286	15	1.14286	15	1.14286	15	1.14286	15	1.14286	15	1.14286	15	13.5918	1.6	13	4.66667	3	4.40816	5	4.26871
LTRL590_350044300.1	LtrL590_35:1,437,119..1,437,556(-)	145	438	60S ribosomal protein L27A/L29, putative	1	2	0	1	1	2	1.66667	0	1	0	1	#DIV/0!	0	0.666667	1	2	1	2	1	2	1	2	2	0	1	1	2	1	2	1	2	1	2	#DIV/0!	0	1	2	1.42857	#DIV/0!	0	-1	-1.33333	-0.761905	0.666667	-0.607143
LTRL590_350007300.1	LtrL590_35:58,706..59,497(+)	263	792	hypothetical protein, conserved	0	6	0	7	0	7	6.66667	#DIV/0!	0	#DIV/0!	0	#DIV/0!	0	0	0	7	0	7	0	7	0	7	7	#DIV/0!	0	0	7	0	7	0	7	0	7	0	7	0	7	5	0	6	-6.66667	-7	-5	-6	-6.16667
LTRL590_350008300.1	LtrL590_35:84,730..86,361(+)	543	1632	serine palmitoyltransferase, putative	0.333333	8	0.75	7	0.25	5	6.66667	0.4	7	0.4	7	1	4	6	0.25	5	0.25	5	0.25	5	0.25	5	5	0.4	7	0.25	5	0.5	6	0.25	5	0.25	5	0.25	5	0.25	5	4.75	0.25	5	-0.666667	1	1.25	1	0.645833
LTRL590_220017600.1	LtrL590_22:501,360..502,593(-)	411	1233	hypothetical protein, conserved	3.5	9	2.5	7	2.5	7	7.66667	3	8	3	8	8	9	8.33333	2.5	7	4	5	3	4	2.5	7	5.75	3	8	4	5	2.5	7	4	5	3	4	2.5	7	2.5	7	6	2	6	0.666667	2.58333	2.33333	2.33333	1.97917
LTRL590_340022400.1	LtrL590_34:676,639..677,100(-)	153	462	p25-alpha, putative	0.5	3	0.5	3	0.666667	5	3.66667	#DIV/0!	2	#DIV/0!	1	#DIV/0!	2	1.66667	0	2	0	2	0	2	1.5	5	2.75	#DIV/0!	1	1.5	5	1.5	5	1.5	5	1.5	5	1.5	5	1.5	5	3.92857	0	2	-2	-1.08333	-2.2619	-0.333333	-1.41964
LTRL590_080010900.1	LtrL590_08:224,007..225,473(+)	488	1467	Mycolic acid cyclopropane synthetase, putative	1	8	1	10	1	8	8.66667	1.5	5	1.5	5	3	4	4.66667	1	8	1	8	1	8	1	8	8	1.5	5	1	8	1	8	1	8	1	8	1	8	1	8	6.57143	1	8	-4	-3.33333	-1.90476	-3.33333	-3.14286
LTRL590_280017900.1	LtrL590_28:456,545..457,225(+)	226	681	hypothetical protein, conserved	0	3	0	3	0	3	3	0.333333	4	0.333333	4	0.5	3	3.66667	0	3	0	3	0	3	#DIV/0!	0	2.25	0.333333	4	0	3	0	3	0	3	0	3	0	3	0	3	2.71429	0	1	0.666667	1.41667	0.952381	2.66667	1.4256
LTRL590_140008800.1	LtrL590_14:105,663..106,520(+)	285	858	proteasome alpha 3 subunit, putative	0	2	0	1	0	1	1.33333	0	3	0	3	0	1	2.33333	0	2	0	2	0	2	0	2	2	0	3	0	2	0	2	0	2	0	2	0	1	0	2	1.71429	#DIV/0!	0	1	0.333333	0.619048	2.33333	1.07143
LTRL590_000007300.1	LTRL590_SCAF000022:10,490..11,332(+)	280	843	hypothetical protein, conserved	0	1	0	2	0	1	1.33333	0	2	0	2	0.666667	5	3	0	2	0	2	0	2	0	2	2	0	2	0	2	0	2	0	2	0	2	0	2	0	2	1.71429	#DIV/0!	0	1.66667	1	1.28571	3	1.7381
LTRL590_100010100.1	LtrL590_10:196,830..197,201(-)	123	372	hypothetical protein, conserved	1	2	0	1	0	1	1.33333	1.5	5	1.5	5	2	3	4.33333	0	1	0	1	0	1	0	2	1.25	1.5	5	0	2	0	2	0	2	0	2	0	2	0	2	2.14286	#DIV/0!	0	3	3.08333	2.19048	4.33333	3.15179
LTRL590_340024000.1	LtrL590_34:740,345..741,295(-)	316	951	hypothetical protein	1	10	1	10	1.2	11	10.3333	0.833333	11	0.833333	11	0.5	12	11.3333	1	10	1	10	1	10	0.857143	13	10.75	0.833333	11	0.857143	13	0.857143	13	0.857143	13	0.857143	13	0.857143	13	0.857143	13	10.9796	1.25	9	1	0.583333	0.353741	2.33333	1.0676
LTRL590_020005600.1	LtrL590_02:20,783..21,712(-)	309	930	hypothetical protein, conserved	1	10	1	10	1	10	10	1.25	9	1.25	9	1	10	9.33333	1.2	11	1.2	11	1.2	11	1.2	11	11	1.25	9	1.2	11	1.2	11	1.2	11	1.2	11	1.2	11	1.2	11	9.31429	2	9	-0.666667	-1.66667	0.0190476	0.333333	-0.495238
LTRL590_260030000.1	LtrL590_26:962,313..962,978(+)	221	666	hypothetical protein, conserved	0.25	5	0.2	6	0.166667	7	6	1	2	1	2	#DIV/0!	1	1.66667	0.166667	7	0.166667	7	0.166667	7	0.166667	7	7	1	2	0.166667	7	0.166667	7	0.166667	7	0.166667	7	0.166667	7	0.166667	7	5.30952	0.25	5	-4.33333	-5.33333	-3.64286	-3.33333	-4.16071
LTRL590_330029800.1	LtrL590_33:890,264..890,452(+)	62	189	hypothetical protein	#DIV/0!	2	#DIV/0!	2	#DIV/0!	2	2	0.333333	4	0.333333	4	0.5	3	3.66667	3	4	3	4	2	3	2	3	3.5	0.333333	4	3	4	2	3	3	4	3	4	3	4	2	3	3.57143	#DIV/0!	2	1.66667	0.166667	0.0952381	1.66667	0.89881
LTRL590_360081100.1	LtrL590_36:2,630,627..2,631,448(-)	273	822	hypothetical protein, conserved	1	2	1	2	1	2	2	0.4	7	0.4	7	3	4	6	#DIV/0!	1	#DIV/0!	1	#DIV/0!	1	2	3	1.5	0.4	7	2	3	2	3	2	3	2	3	2	3	2	3	3.42857	2	3	4	4.5	2.57143	3	3.51786
LTRL590_280015700.1	LtrL590_28:361,594..362,139(+)	181	546	hypothetical protein	3.5	9	3.5	9	3.5	9	9	2.5	7	2.5	7	7	8	7.33333	4	10	4	10	4	10	#DIV/0!	1	7.75	2.5	7	4	10	4	10	4	10	4	10	3.5	9	4	10	8.57143	2.5	7	-1.66667	-0.416667	-1.2381	0.333333	-0.747024
LTRL590_220020000.1	LtrL590_22:577,653..579,503(+)	616	1851	hypothetical protein, conserved	1	12	1.2	11	1	12	11.6667	0.375	11	0.375	11	0.5	9	10.3333	1.16667	13	1.16667	13	1.16667	13	1.33333	14	13.25	0.375	11	1.16667	13	1.33333	14	1.16667	13	1.16667	13	1.16667	13	1.16667	13	11.1667	1	12	-1.33333	-2.91667	-0.833333	-1.66667	-1.6875
LTRL590_350018600.1	LtrL590_35:488,652..490,343(+)	563	1692	Thioredoxin, putative	1.66667	8	2	6	2	6	6.66667	4	5	4	5	1	2	4	1.33333	7	1.33333	7	1.33333	7	1.33333	7	7	4	5	1.33333	7	1.33333	7	1.33333	7	1.33333	7	1.33333	7	1.33333	7	5.90476	1.5	5	-2.66667	-3	-1.90476	-1	-2.14286
LTRL590_360044400.1	LtrL590_36:1,362,095..1,362,952(-)	285	858	glycosyl transferase-like protein	#DIV/0!	2	#DIV/0!	1	#DIV/0!	1	1.33333	0.5	6	0.5	6	0.666667	5	5.66667	2	3	2	3	2	3	2	3	3	0.5	6	2	3	2	3	2	3	2	3	2	3	2	3	3.28571	2	3	4.33333	2.66667	2.38095	2.66667	3.0119
LTRL590_320029100.1	LtrL590_32:864,642..865,343(-)	233	702	COP9 signalosome, subunit CSN8, putative	0	1	0	1	0	1	1	0	2	0	2	0	2	2	0	2	0	2	0	2	0	2	2	0	2	0	2	0	2	0	2	0	2	0	2	0	2	1.71429	#DIV/0!	0	1	0	0.285714	2	0.821429
LTRL590_360066000.1	LtrL590_36:2,132,387..2,133,256(-)	289	870	branch point binding protein, putative	0	1	#DIV/0!	0	#DIV/0!	0	0.333333	0	5	0	5	0	3	4.33333	0	2	0	2	0	2	0	2	2	0	5	0	2	0	3	0	2	0	2	0	2	0	2	2.28571	0	2	4	2.33333	2.04762	2.33333	2.67857
LTRL590_350024100.1	LtrL590_35:684,471..685,469(+)	332	999	60S ribosomal protein L5, putative	0.333333	4	1	4	0.5	3	3.66667	3	4	3	4	5	6	4.66667	1	4	1	4	1	4	1	4	4	3	4	1	4	1	4	1	4	1	4	1	4	1	4	3.57143	1	2	1	0.666667	1.09524	2.66667	1.35714
LTRL590_080015400.1	LtrL590_08:409,673..410,260(+)	195	588	MIX protein	2	3	2	3	#DIV/0!	2	2.66667	#DIV/0!	1	#DIV/0!	1	#DIV/0!	1	1	2	3	2	3	2	3	2	3	3	#DIV/0!	1	2	3	2	3	2	3	2	3	2	3	2	3	2.57143	#DIV/0!	1	-1.66667	-2	-1.57143	0	-1.30952
LTRL590_350042600.1	LtrL590_35:1,385,779..1,386,288(-)	169	510	iron-sulfur cluster assembly protein, putative	0	2	0	1	0	2	1.66667	0	1	0	1	0	1	1	0	2	0	2	0	2	0	2	2	0	1	0	2	0	2	0	2	0	2	0	2	0	2	1.57143	#DIV/0!	0	-0.666667	-1	-0.571429	1	-0.309524
LTRL590_250031600.1	LtrL590_25:886,221..888,380(+)	719	2160	glutathionylspermidine synthase, putative	3.6	23	3.66667	14	2.2	16	17.6667	1.22222	20	1.22222	20	0.888889	17	19	2.28571	23	2.28571	23	0.8	9	2.28571	23	19.5	1.22222	20	2.28571	23	2.28571	23	2.28571	23	2.28571	23	2.28571	23	2.28571	23	19.6122	2.16667	19	1.33333	-0.5	-0.612245	0	0.0552721
LTRL590_330011300.1	LtrL590_33:182,882..183,316(-)	144	435	hypothetical protein, conserved	#DIV/0!	2	#DIV/0!	2	#DIV/0!	2	2	0.666667	5	0.666667	5	0.5	3	4.33333	1	4	1	4	1	4	0	2	3.5	0.666667	5	1	4	1	4	1	4	1	4	1	4	1	4	3.71429	1	4	2.33333	0.833333	0.619048	0.333333	1.02976
LTRL590_260015800.1	LtrL590_26:346,715..347,095(+)	126	381	hypothetical protein, conserved	0	1	0	1	0	1	1	0	2	0	2	0	2	2	0	3	0	3	0	3	0	2	2.75	0	2	0	3	0	3	0	3	0	3	0	3	0	3	2.42857	0	3	1	-0.75	-0.428571	-1	-0.294643
LTRL590_350038900.1	LtrL590_35:1,259,797..1,260,363(-)	188	567	60S ribosomal subunit protein L31, putative	0	1	0	3	0	2	2	0	1	0	1	1	2	1.33333	0	2	0	2	0	2	0	1	1.75	0	1	0	2	0	2	0	2	0	2	0	1	0	2	1.42857	#DIV/0!	0	-0.666667	-0.416667	-0.0952381	1.33333	0.0386905
LTRL590_290016000.1	LtrL590_29:372,865..374,376(+)	503	1512	LETM1 and EF-hand domain-containing protein 1, putative	0	1	0	1	0	1	1	0	1	0	1	0	1	1	0	2	0.5	3	0.5	3	0.5	3	2.75	0	1	0.5	3	0.5	3	0.5	3	0.5	3	0	2	0	2	2.07143	0.5	3	0	-1.75	-1.07143	-2	-1.20536
LTRL590_300036700.1	LtrL590_30:1,110,645..1,111,217(-)	190	573	60S ribosomal protein L9, putative	#DIV/0!	1	#DIV/0!	0	#DIV/0!	0	0.333333	0	4	0	4	0.25	5	4.33333	0	2	0	2	0	1	0	1	1.5	0	4	0	2	0	2	0	2	0	2	0	1	0	2	1.85714	#DIV/0!	0	4	2.83333	2.47619	4.33333	3.41071
LTRL590_360052500.1	LtrL590_36:1,606,579..1,607,562(+)	327	984	hypothetical protein, conserved	0.75	7	0.333333	4	0.333333	4	5	1.42857	17	1.42857	17	0.8	9	14.3333	1	6	1	6	1	6	1	6	6	1.42857	17	1	6	1	6	1	6	1	6	1	6	1	6	6.85714	0.666667	5	9.33333	8.33333	7.47619	9.33333	8.61905
LTRL590_310034400.1	LtrL590_31:1,231,615..1,232,664(-)	349	1050	3,2-trans-enoyl-CoA isomerase, mitochondrial precursor, putative	#DIV/0!	0	#DIV/0!	0	#DIV/0!	0	0	0	1	0	1	1	2	1.33333	1	2	0	1	1	2	1	2	1.75	0	1	1	2	1	4	0	1	0	1	#DIV/0!	0	0	1	1.28571	#DIV/0!	0	1.33333	-0.416667	0.047619	1.33333	0.574405
LTRL590_360077500.1	LtrL590_36:2,528,566..2,529,186(-)	206	621	hypothetical protein, conserved	1	2	1	2	0	1	1.66667	#DIV/0!	3	#DIV/0!	3	#DIV/0!	3	3	#DIV/0!	2	#DIV/0!	2	#DIV/0!	2	3	4	2.5	#DIV/0!	3	3	4	3	4	3	4	3	4	3	4	3	4	3.71429	1	2	1.33333	0.5	-0.714286	1	0.529762
LTRL590_310023000.1	LtrL590_31:724,942..726,132(-)	396	1191	hypothetical protein, conserved	2	3	1	2	0	1	2	0.666667	5	0	1	2	6	4	0	2	0	2	0	1	0	2	1.75	0	1	0	2	0.5	3	0.5	3	0	2	#DIV/0!	0	0	2	1.5	#DIV/0!	0	2	2.25	2.5	4	2.6875
LTRL590_310041200.1	LtrL590_31:1,457,556..1,458,959(-)	467	1404	Endoplasmic Reticulum-Golgi Intermediate Compartment (ERGIC)/Endoplasmic reticulum vesicle transporter, putative	0	3	0	4	0.25	5	4	0.75	7	0.75	7	1	4	6	5	6	5	6	4	5	5	6	5.75	0.75	7	5	6	5	6	5	6	5	6	5	6	5	6	6	4	5	2	0.25	0	1	0.8125
LTRL590_300021700.1	LtrL590_30:556,204..556,974(+)	255	768	hypothetical protein	0.5	3	0.75	7	2	9	6.33333	1.5	5	0.75	7	0.5	6	6	0.6	8	0.6	8	0.6	8	0.8	9	8.25	0.75	7	0.5	9	0.8	9	0.6	8	1.2	11	0.333333	4	0.6	8	6.94286	0.6	8	-0.333333	-2.25	-0.942857	-2	-1.38155
LTRL590_100013700.1	LtrL590_10:287,300..287,869(-)	189	570	Zn-finger in Ran binding protein and others, putative	#DIV/0!	1	0	2	1	2	1.66667	0	2	0	2	0	1	1.66667	#DIV/0!	0	#DIV/0!	0	#DIV/0!	0	1	2	0.5	0	2	1	2	1	2	1	2	1	2	1	2	1	2	1.85714	#DIV/0!	0	0	1.16667	-0.190476	1.66667	0.660714
LTRL590_230023500.1	LtrL590_23:675,862..676,359(+)	165	498	hypothetical protein, conserved	2	3	1	4	2	3	3.33333	#DIV/0!	3	#DIV/0!	3	#DIV/0!	3	3	1.5	5	1.5	5	1.5	5	1.5	5	5	#DIV/0!	3	1.5	5	1.5	5	1.5	5	1.5	5	1.5	5	1.5	5	4.21429	2	3	-0.333333	-2	-1.21429	0	-0.886905
LTRL590_180018600.1	LtrL590_18:606,670..608,559(+)	629	1890	zinc finger containing protein, putative	2	3	1	2	1	2	2.33333	0.428571	10	0.428571	10	0.428571	10	10	0.333333	4	0.333333	4	0.333333	4	0.333333	4	4	0.428571	10	0.333333	4	0.333333	4	0.333333	4	0.333333	4	0.333333	4	0.333333	4	4.33333	1	4	7.66667	6	5.66667	6	6.33333
LTRL590_240030700.1	LtrL590_24:873,577..874,068(-)	163	492	hypothetical protein, conserved	0.333333	8	0.285714	9	0.333333	8	8.33333	1	4	1	4	0	3	3.66667	0.333333	8	0.333333	8	0.333333	8	0.333333	8	8	1	4	0.333333	8	0.333333	8	0.333333	8	0.333333	8	0.333333	8	0.333333	8	6.33333	0.333333	8	-4.66667	-4.33333	-2.66667	-4.33333	-4
LTRL590_350050900.1	LtrL590_35:1,677,008..1,677,628(+)	206	621	Snf7, putative	0.5	3	0.5	3	0.5	3	3	#DIV/0!	1	#DIV/0!	1	#DIV/0!	2	1.33333	2	3	2	3	2	3	1	2	2.75	#DIV/0!	1	1	2	1	2	0.5	3	0.5	3	0.5	3	1	2	1.92857	#DIV/0!	1	-1.66667	-1.41667	-0.595238	0.333333	-0.83631
LTRL590_360018600.1	LtrL590_36:473,880..474,452(+)	190	573	40S ribosomal protein S9, putative	0	2	0	2	0	2	2	0	3	0	3	0	2	2.66667	0	2	0	2	0	1	0	2	1.75	0	3	0	2	0	2	0	2	0	2	#DIV/0!	0	0	2	1.57143	#DIV/0!	0	0.666667	0.916667	1.09524	2.66667	1.33631
LTRL590_260007500.1	LtrL590_26:64,658..65,473(-)	271	816	Nucleotide hydrolase, putative	0	1	0	1	0	1	1	0.5	3	0.5	3	0	1	2.33333	0	3	0	3	0	3	0	2	2.75	0.5	3	0	3	0	3	0	3	0	3	0	3	0	3	2.57143	0	3	1.33333	-0.416667	-0.238095	-0.666667	0.00297619
LTRL590_310035800.1	LtrL590_31:1,274,401..1,275,450(-)	349	1050	3,2-trans-enoyl-CoA isomerase, mitochondrial precursor, putative	5	6	1	2	1	4	4	0.833333	11	0.666667	10	2	9	10	0.5	6	0.5	6	0.25	5	0.25	5	5.5	0.666667	10	0.5	6	0.4	7	0.5	6	0.6	8	0.25	5	0.333333	4	5.78571	2	6	6	4.5	4.21429	4	4.67857
LTRL590_200008000.1	LtrL590_20:100,700..101,803(+)	367	1104	Enkuring domain-containig protein	2	3	#DIV/0!	2	#DIV/0!	3	2.66667	0.571429	11	0.571429	11	0.6	8	10	3	4	3	4	3	4	3	4	4	0.571429	11	3	4	3	4	3	4	3	4	3	4	3	4	4.85714	3	4	7.33333	6	5.14286	6	6.11905
LTRL590_300011500.1	LtrL590_30:190,906..192,480(-)	524	1575	AMP-binding enzyme, putative	0.333333	4	0.5	3	1	4	3.66667	0.75	7	0.75	7	0.5	6	6.66667	0.25	5	0.25	5	0.25	5	0.25	5	5	0.75	7	0.25	5	0.25	5	0.25	5	0.25	5	0.25	5	0.25	5	4.60714	0.5	3	3	1.66667	2.05952	3.66667	2.59821
LTRL590_230009200.1	LtrL590_23:128,368..129,444(+)	358	1077	hypothetical protein, conserved	0.666667	5	0.666667	5	0.666667	5	5	0.8	9	0.8	9	2.33333	10	9.33333	0.4	7	0.4	7	0.4	7	0.5	3	6	0.8	9	0.4	7	0.4	7	0.5	3	0.5	3	0.5	3	0.4	7	5.21429	0.4	7	4.33333	3.33333	4.11905	2.33333	3.52976
LTRL590_300018800.1	LtrL590_30:431,245..432,153(+)	302	909	pyridoxal kinase, putative	0	2	0	2	0	2	2	3	4	3	4	1	4	4	0.5	3	0.5	3	0.5	3	0.5	3	3	3	4	0.5	3	0.5	3	0.5	3	0.5	3	0.5	3	0.5	3	2.78571	0	1	2	1	1.21429	3	1.80357
LTRL590_260019500.1	LtrL590_26:516,260..516,562(+)	100	303	hypothetical protein	3	4	0	1	1	4	3	1.33333	7	1.33333	7	1	4	6	2	3	0.5	3	1.33333	7	1.33333	7	5	1.33333	7	2	3	2	3	0.5	3	1	2	1	4	2	3	3.21429	3	4	3	1	2.78571	2	2.19643
LTRL590_280019300.1	LtrL590_28:498,258..500,954(+)	898	2697	ATP-dependent RNA helicase, putative	1.33333	7	0.75	7	0.75	7	7	1.33333	7	1.33333	7	0.8	9	7.66667	0.75	7	0.75	7	0.75	7	#DIV/0!	0	5.25	1.33333	7	0.75	7	0.75	7	0.75	7	0.75	7	0.75	7	0.75	7	6.10714	1.5	5	0.666667	2.41667	1.55952	2.66667	1.82738
LTRL590_340006400.1	LtrL590_34:48,073..48,336(+)	87	264	lactate/malate dehydrogenase, alpha/beta C-terminal domain containing protein, putative	0.5	3	0.5	3	1	2	2.66667	0	3	0	3	0	2	2.66667	0.333333	4	0.333333	4	0.333333	4	0.333333	4	4	0	3	0.333333	4	0.333333	4	0.333333	4	0.25	5	0.25	5	0.333333	4	3.61905	0	2	0	-1.33333	-0.952381	0.666667	-0.404762
LTRL590_350029600.1	LtrL590_35:913,644..914,897(+)	417	1254	phosphoinositide-binding protein, putative	0.285714	9	0.285714	9	0.285714	9	9	0.25	5	0.25	5	0	3	4.33333	0.285714	9	0.285714	9	0.285714	9	0.285714	9	9	0.25	5	0.285714	9	0.285714	9	0.285714	9	0.285714	9	0.285714	9	0.285714	9	7.18367	0.285714	9	-4.66667	-4.66667	-2.85034	-4.66667	-4.21259
LTRL590_300028000.1	LtrL590_30:816,221..817,840(-)	539	1620	Uncharacterised ACR, YagE family COG1723, putative	0.333333	8	0.333333	8	0.333333	8	8	1.33333	7	1.33333	7	1.5	10	8	0.428571	10	0.428571	10	0.428571	10	0.428571	10	10	1.33333	7	0.428571	10	0.428571	10	0.428571	10	0.428571	10	0.428571	10	0.428571	10	8.20408	0.5	9	0	-2	-0.204082	-1	-0.80102
LTRL590_080015500.1	LtrL590_08:411,052..412,236(+)	394	1185	hypothetical protein, conserved	0.6	8	0.428571	10	0.666667	10	9.33333	1	6	1	6	1	6	6	0.5	9	0.5	9	0.5	9	0.5	9	9	1	6	0.5	9	0.5	9	0.5	9	0.5	9	0.5	9	0.5	9	7.35714	0.6	8	-3.33333	-3	-1.35714	-2	-2.42262
LTRL590_360033800.1	LtrL590_36:1,040,354..1,041,475(+)	373	1122	hypothetical protein, conserved	#DIV/0!	3	#DIV/0!	3	#DIV/0!	4	3.33333	0	1	0	1	0	2	1.33333	4	5	4	5	4	5	4	5	5	0	1	4	5	4	5	4	5	4	5	4	5	4	5	4.28571	#DIV/0!	3	-2	-3.66667	-2.95238	-1.66667	-2.57143
LTRL590_110019300.1	LtrL590_11:520,173..520,724(+)	183	552	SKP1-like protein	#DIV/0!	0	#DIV/0!	0	#DIV/0!	0	0	1	2	1	2	1	2	2	#DIV/0!	1	#DIV/0!	1	#DIV/0!	1	1	2	1.25	1	2	1	2	1	2	1	2	1	2	1	2	1	2	1.85714	1	2	2	0.75	0.142857	0	0.723214
LTRL590_300024100.1	LtrL590_30:658,083..658,439(+)	118	357	hypothetical protein, conserved	0	2	0	1	0	1	1.33333	0	3	0	3	0	3	3	0	2	0	2	0	2	0	2	2	0	3	0	2	0	2	0	2	0	2	0	2	0	2	1.85714	#DIV/0!	0	1.66667	1	1.14286	3	1.70238
LTRL590_210026200.1	LtrL590_21:735,929..736,624(-)	231	696	proteasome alpha 2 subunit, putative	1	2	0.5	3	1	2	2.33333	0.5	3	0.5	3	#DIV/0!	1	2.33333	2	3	2	3	2	3	2	3	3	0.5	3	2	3	2	3	2	3	2	3	2	3	2	3	2.85714	#DIV/0!	1	0	-0.666667	-0.52381	1.33333	0.0357143
LTRL590_250014900.1	LtrL590_25:334,113..334,991(+)	292	879	protein kinase, putative	0.5	3	0.333333	4	0.333333	4	3.66667	0.666667	5	0.666667	5	1.5	5	5	2	6	2	6	3	4	2	6	5.5	0.666667	5	2	6	2	6	2	6	2	6	2	6	2	6	5.28571	3	4	1.33333	-0.5	-0.285714	1	0.386905
LTRL590_310021300.1	LtrL590_31:620,906..622,507(-)	533	1602	'Cold-shock' DNA-binding domain containing protein, putative	0.5	3	0	2	0	1	2	1.5	5	2	3	#DIV/0!	1	3	0	1	0	1	#DIV/0!	0	0	1	0.75	2	3	0	2	0	2	1	2	0	2	#DIV/0!	0	0	2	1.71429	#DIV/0!	0	1	2.25	1.28571	3	1.88393
LTRL590_360080400.1	LtrL590_36:2,613,248..2,613,736(-)	162	489	hypothetical protein, conserved	0	3	0	2	0	3	2.66667	0.333333	4	0.333333	4	0	1	3	#DIV/0!	0	#DIV/0!	0	#DIV/0!	0	0	2	0.5	0.333333	4	0	2	0	2	0	2	0	2	0	2	0	2	2	0	2	0.333333	2.5	1	1	1.20833
LTRL590_320013700.1	LtrL590_32:287,698..288,216(+)	172	519	hypothetical protein	3.5	9	4.5	11	3.5	9	9.66667	#DIV/0!	4	#DIV/0!	4	#DIV/0!	3	3.66667	3.5	9	3.5	9	3.5	9	3.5	9	9	#DIV/0!	4	3.5	9	3.5	9	3.5	9	3.5	9	3.5	9	3.5	9	7.5	3.5	9	-6	-5.33333	-3.83333	-5.33333	-5.125
LTRL590_360082700.1	LtrL590_36:2,678,870..2,679,364(-)	164	495	EVE domain containing protein, putative	#DIV/0!	0	#DIV/0!	0	#DIV/0!	0	0	1	2	1	2	0.5	3	2.33333	1	2	1	2	1	2	#DIV/0!	0	1.5	1	2	1	2	1	2	1	2	1	2	1	2	1	2	1.85714	1	2	2.33333	0.833333	0.47619	0.333333	0.994048
LTRL590_280030300.1	LtrL590_28:924,436..926,730(+)	764	2295	histone acetyltransferase, putative	0.375	11	0.375	11	0.333333	12	11.3333	0.714286	12	0.714286	12	0.777778	16	13.3333	0.333333	12	0.333333	12	0.333333	12	0	1	9.25	0.714286	12	0.333333	12	0.333333	12	0.444444	13	0.333333	12	0.333333	12	0.333333	12	10.3492	0.375	11	2	4.08333	2.98413	2.33333	2.8502
LTRL590_320016000.1	LtrL590_32:372,944..373,759(+)	271	816	ubiquitin-conjugating enzyme protein, putative	1	2	0.5	3	0.5	3	2.66667	0.333333	4	0.333333	4	1	2	3.33333	0.5	3	0.5	3	0.5	3	0.5	3	3	0.333333	4	0.5	3	0.5	3	0.5	3	0.5	3	0.5	3	0.5	3	2.78571	0	1	0.666667	0.333333	0.547619	2.33333	0.970238
LTRL590_280008800.1	LtrL590_28:125,300..126,943(-)	547	1644	katanin, putative	0.8	9	0.8	9	0.8	9	9	0.125	9	0.125	9	0.142857	8	8.66667	0.8	9	0.8	9	0.8	9	#DIV/0!	0	6.75	0.125	9	0.8	9	0.8	9	0.8	9	0.8	9	0.8	9	0.8	9	7.82857	0.6	8	-0.333333	1.91667	0.838095	0.666667	0.772024
LTRL590_300011600.1	LtrL590_30:193,661..196,153(-)	830	2493	Ciliary BBSome complex subunit 2, N-terminal/Ciliary BBSome complex subunit 2, middle region/Ciliary BBSome complex subunit 2, C-terminal, putative	1	4	1	4	0.666667	5	4.33333	0.75	7	0.75	7	0.4	7	7	0.5	6	0.5	6	0.5	6	0.5	6	6	0.75	7	0.5	6	0.5	6	0.5	6	0.5	6	0.5	6	0.5	6	5.35714	1	4	2.66667	1	1.64286	3	2.07738
LTRL590_320044500.1	LtrL590_32:1,445,589..1,446,032(+)	147	444	hypothetical protein, conserved	1	2	#DIV/0!	1	#DIV/0!	1	1.33333	#DIV/0!	1	#DIV/0!	1	0.5	3	1.66667	0.5	3	0.5	3	0.5	3	0.5	3	3	#DIV/0!	1	0.5	3	0.5	3	0.5	3	0.5	3	0.5	3	0.5	3	2.35714	0	1	0.333333	-1.33333	-0.690476	0.666667	-0.255952
LTRL590_060015500.1	LtrL590_06:428,679..430,184(+)	501	1506	MYND finger/SET domain containing protein, putative	0	4	0	4	0	4	4	0.375	11	0.375	11	0.4	7	9.66667	0	6	0	6	0	6	0	6	6	0.375	11	0	6	0	6	0	6	0	6	0	6	0	6	5.85714	0	5	5.66667	3.66667	3.80952	4.66667	4.45238
LTRL590_280028400.1	LtrL590_28:860,714..862,597(-)	627	1884	CEP76 C2 domain containing protein, putative	0.5	9	0.5	9	0.5	9	9	0.25	5	0.5	6	1	6	5.66667	1	10	1	10	1	10	#DIV/0!	2	8	0.5	6	1	10	1	10	1	10	1	10	1	10	1	10	8.14286	1	10	-3.33333	-2.33333	-2.47619	-4.33333	-3.11905
LTRL590_270010700.1	LtrL590_27:214,418..215,500(+)	360	1083	replication factor C, subunit 4, putative	0	1	3	4	0	1	2	3	4	3	4	1	2	3.33333	3	4	#DIV/0!	2	3	4	1	2	3	3	4	1	2	1	2	1	2	1	2	1	2	1	2	2.14286	3	4	1.33333	0.333333	1.19048	-0.666667	0.547619
LTRL590_240018900.1	LtrL590_24:471,704..471,925(+)	73	222	hypothetical protein	#DIV/0!	1	#DIV/0!	1	#DIV/0!	1	1	0.5	3	0.5	3	0.5	3	3	2	3	2	3	2	3	2	3	3	0.5	3	2	3	2	3	2	3	2	3	2	3	2	3	2.85714	1	2	2	0	0.142857	1	0.785714
LTRL590_350039300.1	LtrL590_35:1,268,557..1,269,186(-)	209	630	transport protein particle (TRAPP) subunit, putative	0	1	0	1	0	1	1	0.5	3	0.5	3	0	1	2.33333	0	2	0	2	0	2	0	2	2	0.5	3	0	2	0	2	0	2	0	2	0	2	0	2	1.85714	#DIV/0!	0	1.33333	0.333333	0.47619	2.33333	1.11905
LTRL590_360023900.1	LtrL590_36:678,286..679,449(-)	387	1164	phosphatidylinositolN-acetylglucosaminyltransfe ra sesubunit c, putative	0	3	0	3	0	3	3	2	6	2	6	#DIV/0!	3	5	1	4	1	4	1	4	1	4	4	2	6	1	4	1	4	1	4	1	4	1	4	1	4	3.85714	#DIV/0!	2	2	1	1.14286	3	1.78571
LTRL590_060006300.1	LtrL590_06:55,921..56,250(-)	109	330	hypothetical protein, conserved	#DIV/0!	1	#DIV/0!	1	#DIV/0!	1	1	2	3	2	3	3	4	3.33333	2	3	2	3	2	3	2	3	3	2	3	2	3	2	3	2	3	2	3	2	3	2	3	2.85714	1	2	2.33333	0.333333	0.47619	1.33333	1.11905
LTRL590_110012900.1	LtrL590_11:226,674..226,913(+)	79	240	argonaute like protein (pseudogene)	#DIV/0!	0	#DIV/0!	0	#DIV/0!	0	0	1	2	1	2	3	4	2.66667	1	2	1	2	1	2	1	2	2	1	2	1	2	1	2	1	2	1	2	1	2	1	2	1.85714	0	1	2.66667	0.666667	0.809524	1.66667	1.45238
LTRL590_150021000.1	LtrL590_15:577,968..578,348(-)	126	381	ribosomal protein S6, putative	#DIV/0!	0	#DIV/0!	0	#DIV/0!	0	0	0	3	0	3	0	2	2.66667	0	2	0	2	0	2	0	2	2	0	3	0	2	0	2	0	2	0	2	0	2	0	2	1.85714	0	1	2.66667	0.666667	0.809524	1.66667	1.45238
LTRL590_340017900.1	LtrL590_34:492,905..493,702(-)	265	798	Domain of Unknown Function (DUF1042), putative	3	4	1.5	5	1.5	5	4.66667	0.2	6	0.2	6	0.333333	4	5.33333	2	3	2	3	2	3	1.5	5	3.5	0.2	6	2	6	1.5	5	1.5	5	1.5	5	1.5	5	2	6	4.92857	2	3	0.666667	1.83333	0.404762	2.33333	1.30952
LTRL590_360067700.1	LtrL590_36:2,194,577..2,195,395(-)	272	819	CAP/Srv2p, putative	0	2	0	2	0.5	3	2.33333	0.666667	5	0.666667	5	0.25	5	5	#DIV/0!	0	#DIV/0!	0	#DIV/0!	0	0	2	0.5	0.666667	5	0	2	0.5	3	0	2	0	2	0	2	0	2	2.28571	0	1	2.66667	4.5	2.71429	4	3.47024
LTRL590_360040700.1	LtrL590_36:1,261,121..1,262,254(-)	377	1134	hypothetical protein, conserved	1.66667	8	1.33333	7	1.33333	7	7.33333	0	4	0	4	0	4	4	1.25	9	1.25	9	1.25	9	1.25	9	9	0	4	1.25	9	1.25	9	1.25	9	1.25	9	1.25	9	1.25	9	7.17857	0.75	7	-3.33333	-5	-3.17857	-3	-3.62798
LTRL590_120006300.1	LtrL590_12:22,695..22,997(+)	100	303	hypothetical protein	1	2	#DIV/0!	1	#DIV/0!	1	1.33333	0.6	8	0.6	8	0.5	6	7.33333	0.5	3	0.5	3	0.5	3	0.5	3	3	0.6	8	0.5	3	0.5	3	0.5	3	0.5	3	0.5	3	0.5	3	3.35714	1	2	6	4.33333	3.97619	5.33333	4.91071
LTRL590_350058500.1	LtrL590_35:1,913,573..1,914,493(+)	306	921	hypothetical protein, conserved	1	10	1.2	11	1	10	10.3333	0.75	7	0.75	7	1	6	6.66667	1	10	1	10	1	10	1	10	10	0.75	7	1	10	1	10	1	10	1	10	1	10	1	10	8.28571	1	10	-3.66667	-3.33333	-1.61905	-3.33333	-2.9881
LTRL590_290032600.1	LtrL590_29:1,122,151..1,122,813(+)	220	663	60S ribosomal protein L13, putative	#DIV/0!	0	#DIV/0!	0	#DIV/0!	0	0	0.5	3	0.5	3	1	4	3.33333	1	2	1	2	1	2	0	1	1.75	0.5	3	1	2	1	2	0	1	1	2	#DIV/0!	0	0	1	1.42857	#DIV/0!	0	3.33333	1.58333	1.90476	3.33333	2.53869
LTRL590_250024500.1	LtrL590_25:695,556..696,518(-)	320	963	hypothetical protein, conserved	0.8	9	1	8	0.428571	10	9	2	12	2	12	7	8	10.6667	1.16667	13	1.16667	13	4	5	1.16667	13	11	2	12	1.16667	13	1.16667	13	1.16667	13	1.16667	13	1.2	11	1.16667	13	10.881	2.33333	10	1.66667	-0.333333	-0.214286	0.666667	0.446429
LTRL590_360036200.1	LtrL590_36:1,130,560..1,131,018(-)	152	459	D-tyrosyl-tRNA deacylase, putative	1	2	#DIV/0!	0	#DIV/0!	0	0.666667	0	1	0	1	0	2	1.33333	1	2	1	2	1	2	1	2	2	0	1	1	2	1	2	1	2	1	2	1	2	1	2	1.71429	#DIV/0!	0	0.666667	-0.666667	-0.380952	1.33333	0.238095
LTRL590_350031200.1	LtrL590_35:981,881..983,122(+)	413	1242	DHHC palmitoyltransferase, putative	2	9	2	9	2	9	9	2	3	2	3	#DIV/0!	3	3	2	9	2	9	2	9	2	9	9	2	3	2	9	2	9	2	9	2	9	2	9	2	9	7.14286	2	9	-6	-6	-4.14286	-6	-5.53571
LTRL590_100010600.1	LtrL590_10:202,057..202,533(-)	158	477	hypothetical protein	#DIV/0!	2	#DIV/0!	2	#DIV/0!	2	2	2	3	2	3	1	2	2.66667	0.5	3	0.5	3	0.5	3	1.5	5	3.5	2	3	1.5	5	1.5	5	1.5	5	1.5	5	1.5	5	1.5	5	4.21429	0.5	3	0.666667	-0.833333	-1.54762	-0.333333	-0.511905
LTRL590_300011400.1	LtrL590_30:188,054..189,478(-)	474	1425	spliceosome-associated protein, putative	1.5	5	1	4	1	4	4.33333	0.75	7	0.6	8	0.666667	5	6.66667	0.666667	5	0.666667	5	0.666667	5	0.666667	5	5	0.6	8	0.666667	5	1	6	0.666667	5	0.666667	5	0.666667	5	0.666667	5	4.95238	0.5	3	2.33333	1.66667	1.71429	3.66667	2.34524
LTRL590_050015900.1	LtrL590_05:421,707..422,066(+)	119	360	hypothetical protein	0	1	0	1	0	1	1	#DIV/0!	2	#DIV/0!	2	2	3	2.33333	2	3	2	3	2	3	0	1	2.5	#DIV/0!	2	2	3	2	3	2	3	2	3	2	3	2	3	2.71429	#DIV/0!	1	1.33333	-0.166667	-0.380952	1.33333	0.529762
LTRL590_330031400.1	LtrL590_33:955,668..956,843(+)	391	1176	udp-glc 4'-epimerase, putative	3	4	3	4	2	6	4.66667	0.5	9	0.666667	10	1.33333	7	8.66667	1.66667	8	1.33333	7	1.33333	7	1	4	6.5	0.666667	10	1.66667	8	1.33333	7	1.33333	7	1.33333	7	1.33333	7	1.33333	7	6.7619	1	6	4	2.16667	1.90476	2.66667	2.68452
LTRL590_040011700.1	LtrL590_04:266,268..266,714(-)	148	447	ubiquitin-conjugating enzyme E2, putative	0	5	0	6	0	5	5.33333	0	3	0	3	0	2	2.66667	0	7	0	7	0	7	0	7	7	0	3	0	7	0	7	0	7	0	7	0	7	0	7	5.42857	0	7	-2.66667	-4.33333	-2.7619	-4.33333	-3.52381
LTRL590_350012500.1	LtrL590_35:264,674..266,119(+)	481	1446	CBS domain protein, conserved	1	6	1	6	0.75	7	6.33333	0	1	0	1	#DIV/0!	1	1	0.75	7	0.75	7	0.75	7	0.75	7	7	0	1	0.75	7	0.75	7	0.75	7	0.75	7	0.75	7	0.75	7	5.25	0.25	5	-5.33333	-6	-4.25	-4	-4.89583
LTRL590_230007700.1	LtrL590_23:82,131..82,796(+)	221	666	hypothetical protein, conserved	0.5	3	0.5	3	0.5	3	3	0.333333	4	0.333333	4	0.25	5	4.33333	0.666667	5	0.666667	5	0.666667	5	1	2	4.25	0.333333	4	0.666667	5	0.666667	5	1	2	1	2	1	2	0.666667	5	3.42857	1	2	1.33333	0.0833333	0.904762	2.33333	1.16369
LTRL590_350025900.1	LtrL590_35:747,629..749,743(+)	704	2115	Domain of unknown function (DUF4205), putative	1	12	1.25	9	1.5	10	10.3333	1.33333	7	1.33333	7	2	6	6.66667	1	10	1	10	1	10	1	10	10	1.33333	7	1	10	1	10	1	10	1	10	1	10	1	10	8.28571	0.8	9	-3.66667	-3.33333	-1.61905	-2.33333	-2.7381
LTRL590_320006100.1	LtrL590_32:35,466..36,401(-)	311	936	mitochondrial carrier protein, putative	#DIV/0!	0	1	2	#DIV/0!	0	0.666667	0.25	5	0.25	5	0.25	5	5	0	2	0	2	0	2	#DIV/0!	0	1.5	0.25	5	0	2	0	2	0	2	0	2	0	2	0	2	2.14286	#DIV/0!	0	4.33333	3.5	2.85714	5	3.92262
LTRL590_360081500.1	LtrL590_36:2,651,883..2,652,761(-)	292	879	nuclear lim interactor-interacting factor, putative	2	3	2	3	2	3	3	0	2	0	2	0	4	2.66667	0	1	0	1	0	1	1	4	1.75	0	2	1	4	1	4	1	4	1	4	1	4	1	4	3.28571	1	4	-0.333333	0.916667	-0.619048	-1.33333	-0.342262
LTRL590_360069200.1	LtrL590_36:2,233,270..2,235,282(-)	670	2013	hypothetical protein, conserved	0.2	6	0	4	0	5	5	0.6	8	0.6	8	0.666667	10	8.66667	0.333333	4	0.333333	4	0.333333	4	0.142857	8	5	0.6	8	0.142857	8	0.142857	8	0.142857	8	0.142857	8	0.142857	8	0.142857	8	6.87755	0.25	5	3.66667	3.66667	1.78912	3.66667	3.19728
LTRL590_000027600.1	LTRL590_SCAF000120:1..1,230(-)	410	1230	Ribosome assembly protein rrb1, putative	0	1	0	1	0	1	1	0.25	5	0.25	5	0	3	4.33333	0	3	0	3	0	3	0	2	2.75	0.25	5	0	3	0	3	0	3	0	3	0	3	0	3	2.85714	0	3	3.33333	1.58333	1.47619	1.33333	1.93155
LTRL590_080010200.1	LtrL590_08:195,561..196,409(+)	282	849	hypothetical protein, conserved	0	2	0	2	0	2	2	1	4	1	4	1	2	3.33333	0	2	0	2	0	2	0	1	1.75	1	4	0	2	0	1	0	2	0	2	0	2	0	2	1.85714	#DIV/0!	0	1.33333	1.58333	1.47619	3.33333	1.93155
LTRL590_350028800.1	LtrL590_35:874,068..876,101(+)	677	2034	poly(A)-specific ribonuclease PARN, putative	1.5	15	1.16667	13	1.16667	13	13.6667	1.14286	15	1.14286	15	1.66667	8	12.6667	1.16667	13	1.16667	13	1.16667	13	1.16667	13	13	1.14286	15	1.16667	13	1.16667	13	1.16667	13	1.16667	13	1.16667	13	1.16667	13	11.5952	1.4	12	-1	-0.333333	1.07143	0.666667	0.10119
LTRL590_160012400.1	LtrL590_16:265,095..266,750(-)	551	1656	Eukaryotic translation initiation factor eIF2A, putative	#DIV/0!	2	1	2	1	2	2	2	3	2	3	1.5	5	3.66667	0.333333	4	0.333333	4	0.333333	4	0.333333	4	4	2	3	0.333333	4	0.333333	4	0.333333	4	0.333333	4	0.333333	4	0.333333	4	3.33333	0.333333	4	1.66667	-0.333333	0.333333	-0.333333	0.333333
LTRL590_270012700.1	LtrL590_27:292,783..293,772(+)	329	990	reductase, putative	0	2	0	2	0	2	2	0.5	3	0.5	3	#DIV/0!	1	2.33333	0.333333	4	0.333333	4	0.333333	4	0.333333	4	4	0.5	3	0.333333	4	0.333333	4	0.333333	4	0.333333	4	0.333333	4	0.333333	4	3.33333	0.333333	4	0.333333	-1.66667	-1	-1.66667	-1
LTRL590_020011200.1	LtrL590_02:272,028..273,521(-)	497	1494	hypothetical protein, conserved	1.4	12	1.4	12	1.4	12	12	2	18	2	18	1	12	16	1.4	12	1.4	12	1.4	12	1.4	12	12	2	18	1.4	12	1.4	12	1.4	12	1.4	12	1.4	12	1.4	12	11.3429	1	10	4	4	4.65714	6	4.66429
LTRL590_360059600.1	LtrL590_36:1,893,829..1,894,665(+)	278	837	pentatricopeptide repeat domain containing protein, putative	0.5	3	0.5	3	0.5	3	3	0.666667	5	0.666667	5	0.333333	8	6	0.25	5	0.25	5	0.25	5	0.25	5	5	0.666667	5	0.25	5	0.25	5	0.25	5	0.25	5	0.25	5	0.25	5	4.32143	0.25	5	3	1	1.67857	1	1.66964
LTRL590_350022300.1	LtrL590_35:626,682..627,770(-)	362	1089	RNA 3'-terminal phosphate cyclase, putative	0.25	5	0.25	5	0.25	5	5	1.5	5	1.5	5	1	2	4	0.25	5	0.25	5	0.25	5	0.25	5	5	1.5	5	0.25	5	0.25	5	0.25	5	0.25	5	0.25	5	0.25	5	4.32143	0	3	-1	-1	-0.321429	1	-0.330357
LTRL590_110006200.1	LtrL590_11:34,822..36,015(+)	397	1194	cyclin-dependent protein kinase, putative	1	2	1	2	1	2	2	0	2	0	2	0	1	1.66667	1	4	1	4	1	4	1	4	4	0	2	1	4	1	4	1	4	1	4	1	4	1	4	3.28571	1	4	-0.333333	-2.33333	-1.61905	-2.33333	-1.65476
LTRL590_360042700.1	LtrL590_36:1,319,213..1,320,043(-)	276	831	Macro domain containing protein, putative	1	4	1	4	1	4	4	4	5	4	5	#DIV/0!	3	4.33333	2	6	2	6	2	6	2	6	6	4	5	2	6	2	6	2	6	2	6	2	6	2	6	5.28571	2	6	0.333333	-1.66667	-0.952381	-1.66667	-0.988095
LTRL590_040009200.1	LtrL590_04:167,546..167,911(-)	121	366	hypothetical protein	1	4	1	4	1	4	4	3	4	3	4	#DIV/0!	3	3.66667	2	6	2	6	2	6	2	6	6	3	4	2	6	1.33333	7	2	6	2	6	2	6	2	6	5.28571	2	6	-0.333333	-2.33333	-1.61905	-2.33333	-1.65476
LTRL590_230025500.1	LtrL590_23:732,467..732,892(+)	141	426	hypothetical protein	0	1	0	1	0	1	1	#DIV/0!	1	#DIV/0!	1	#DIV/0!	2	1.33333	0	3	0	3	0	3	0	3	3	#DIV/0!	1	0	3	0	3	0	3	0	3	0	3	0	3	2.28571	0	3	0.333333	-1.66667	-0.952381	-1.66667	-0.988095
LTRL590_350046800.1	LtrL590_35:1,519,354..1,519,653(+)	99	300	hypothetical protein	#DIV/0!	0	#DIV/0!	2	3	4	2	#DIV/0!	2	#DIV/0!	2	#DIV/0!	1	1.66667	2	3	0.5	3	1	2	2	3	2.75	#DIV/0!	2	1	4	1	4	1	4	1	4	1	4	2	3	3.14286	0	1	-0.333333	-1.08333	-1.47619	0.666667	-0.556548
LTRL590_300029100.1	LtrL590_30:859,526..860,548(-)	340	1023	hypothetical protein, conserved	0.666667	5	0.666667	5	0.666667	5	5	3	8	3	8	5	6	7.33333	0.75	7	0.75	7	0.75	7	0.75	7	7	3	8	0.75	7	0.75	7	0.75	7	0.75	7	0.75	7	0.75	7	6.25	0.75	7	2.33333	0.333333	1.08333	0.333333	1.02083
LTRL590_140021700.1	LtrL590_14:642,279..642,725(+)	148	447	hypothetical protein, conserved	0	2	0	2	0	2	2	#DIV/0!	0	#DIV/0!	0	#DIV/0!	0	0	0	2	0	2	0	2	0	2	2	#DIV/0!	0	0	2	0	2	0	2	0	2	0	2	0	2	1.42857	#DIV/0!	0	-2	-2	-1.42857	0	-1.35714
LTRL590_190013600.1	LtrL590_19:376,504..376,842(+)	112	339	dynein light chain, putative	0	2	0	2	0	2	2	#DIV/0!	0	#DIV/0!	0	#DIV/0!	0	0	0	2	0	2	0	2	0	2	2	#DIV/0!	0	0	2	0	2	0	2	0	2	0	2	0	2	1.42857	#DIV/0!	0	-2	-2	-1.42857	0	-1.35714
LTRL590_230025900.1	LtrL590_23:738,682..739,419(+)	245	738	alanine racemase, putative	0	2	0	2	0	2	2	0.333333	4	0.333333	4	0	3	3.66667	0	4	0	4	0	4	0	4	4	0.333333	4	0	4	0	4	0	4	0	4	0	4	0	4	3.42857	0	4	1.66667	-0.333333	0.238095	-0.333333	0.309524
LTRL590_050013100.1	LtrL590_05:321,424..321,891(+)	155	468	hypothetical protein, conserved	0	3	0	3	0	3	3	1	2	1	2	0	1	1.66667	0	3	0	3	0	3	0	3	3	1	2	0	3	0	3	0	3	0	3	0	3	0	3	2.42857	0	1	-1.33333	-1.33333	-0.761905	0.666667	-0.690476
LTRL590_210012400.1	LtrL590_21:204,558..205,556(-)	332	999	nucleotide-binding protein, putative	0.5	3	0.5	3	0.5	3	3	0	1	0	1	0	3	1.66667	0.5	3	0.5	3	0.5	3	0.5	3	3	0	1	0.5	3	0.5	3	0.5	3	0.5	3	1	2	0.5	3	2.21429	#DIV/0!	1	-1.33333	-1.33333	-0.547619	0.666667	-0.636905
LTRL590_360047300.1	LtrL590_36:1,451,407..1,452,765(+)	452	1359	hypothetical protein, conserved	0.5	6	1	8	1.33333	7	7	0.75	7	0.75	7	0.666667	5	6.33333	0.8	9	0.8	9	0.8	9	0.8	9	9	0.75	7	0.8	9	0.8	9	0.8	9	0.8	9	0.8	9	0.8	9	7.54286	0.4	7	-0.666667	-2.66667	-1.20952	-0.666667	-1.30238
LTRL590_240030800.1	LtrL590_24:874,769..875,821(-)	350	1053	mitogen-activated protein kinase	0	3	0	3	0	3	3	0.2	6	0.2	6	1	2	4.66667	0.25	5	0.25	5	0.25	5	0.25	5	5	0.2	6	0.25	5	0.25	5	0.25	5	0.25	5	0.25	5	0.25	5	4.46429	0.25	5	1.66667	-0.333333	0.202381	-0.333333	0.300595
LTRL590_270017700.1	LtrL590_27:505,187..506,455(-)	422	1269	hypothetical protein, conserved	0	2	0	2	0	2	2	1	4	1	4	1	6	4.66667	0.333333	4	0.333333	4	0.333333	4	0.333333	4	4	1	4	0.333333	4	0.333333	4	0.333333	4	0.333333	4	0.333333	4	0.333333	4	3.47619	0.333333	4	2.66667	0.666667	1.19048	0.666667	1.29762
LTRL590_060018600.1	LtrL590_06:504,714..505,619(-)	301	906	coproporphyrinogen III oxidase	0	3	0	3	0	3	3	1	4	1	4	2	3	3.66667	0.25	5	0.25	5	0.25	5	0.25	5	5	1	4	0.25	5	0.25	5	0.25	5	0.25	5	0.25	5	0.25	5	4.17857	0.25	5	0.666667	-1.33333	-0.511905	-1.33333	-0.627976
LTRL590_230024900.1	LtrL590_23:711,491..712,243(+)	250	753	Qb-SNARE protein, putative	0.5	3	0.5	3	1	4	3.33333	0.666667	5	0.666667	5	2	3	4.33333	1.5	5	1.5	5	1.5	5	1.5	5	5	0.666667	5	1.5	5	1.5	5	1.5	5	1.5	5	1.5	5	1.5	5	4.5	2	3	1	-0.666667	-0.166667	1.33333	0.375
LTRL590_040005800.1	LtrL590_04:26,966..27,760(+)	264	795	DNA topoisomerase type IB small subunit	0	1	0	1	0	1	1	1	2	1	2	1	2	2	0.5	3	0.5	3	0.5	3	0.5	3	3	1	2	0.5	3	0.5	3	0.5	3	0.5	3	0.5	3	0.5	3	2.5	0.5	3	1	-1	-0.5	-1	-0.375
LTRL590_150008100.1	LtrL590_15:108,032..108,595(+)	187	564	ribonucleoprotein p18, mitochondrial precursor, putative	0	1	0	1	0	1	1	0	2	0	2	0	3	2.33333	0.5	3	0.5	3	0.5	3	0.5	3	3	0	2	0.5	3	0.5	3	0.5	3	0.5	3	0.5	3	0.5	3	2.5	0.5	3	1.33333	-0.666667	-0.166667	-0.666667	-0.0416667
LTRL590_130007500.1	LtrL590_13:81,219..82,001(-)	260	783	N-acetyltransferase subunit ARD1, putative	0.5	3	0.5	3	0.5	3	3	#DIV/0!	2	#DIV/0!	2	#DIV/0!	1	1.66667	0.5	3	0.5	3	0.5	3	0.5	3	3	#DIV/0!	2	0.5	3	0.5	3	0.5	3	0.5	3	0.5	3	0.5	3	2.5	0	1	-1.33333	-1.33333	-0.833333	0.666667	-0.708333
LTRL590_160015300.1	LtrL590_16:376,136..376,495(-)	119	360	flagellar calcium-binding protein, putative	#DIV/0!	0	3	4	#DIV/0!	0	1.33333	#DIV/0!	2	#DIV/0!	2	#DIV/0!	2	2	2	3	1	4	2	3	1	4	3.5	#DIV/0!	2	2	3	1	4	2	3	2	3	1	4	2	3	3	2	3	0.666667	-1.5	-1	-1	-0.708333
LTRL590_130009800.1	LtrL590_13:166,888..167,865(+)	325	978	hypothetical protein, conserved	2	6	2	6	2	6	6	#DIV/0!	4	#DIV/0!	4	#DIV/0!	5	4.33333	2	6	2	6	2	6	2	6	6	#DIV/0!	4	2	6	2	6	2	6	2	6	2	6	2	6	5.14286	3	4	-1.66667	-1.66667	-0.809524	0.333333	-0.952381
LTRL590_240027500.1	LtrL590_24:771,200..772,000(-)	266	801	STOP axonemal protein, putative	0	4	0	4	0	4	4	0	6	0	6	0	7	6.33333	0	6	0	6	0	6	0	6	6	0	6	0	6	0	6	0	6	0	6	0	6	0	6	5.14286	0	6	2.33333	0.333333	1.19048	0.333333	1.04762
LTRL590_210018200.1	LtrL590_21:449,722..450,627(+)	301	906	cell division protein kinase 2	0	2	0	2	0	2	2	0	2	0	2	0	3	2.33333	0	4	0	4	0	4	0	4	4	0	2	0	4	0	4	0	4	0	4	0	4	0	4	3.14286	0	4	0.333333	-1.66667	-0.809524	-1.66667	-0.952381
LTRL590_210022300.1	LtrL590_21:591,096..591,761(-)	221	666	Cytochrome b5-like Heme/Steroid binding domain containing protein, putative	0	2	0	2	0	2	2	0	2	0	2	0	3	2.33333	0	4	0	4	0	4	0	4	4	0	2	0	4	0	4	0	4	0	4	0	4	0	4	3.14286	0	4	0.333333	-1.66667	-0.809524	-1.66667	-0.952381
LTRL590_340013900.1	LtrL590_34:362,573..363,844(+)	423	1272	serine/threonine-protein phosphatase PP1, putative	0.25	5	0.25	5	0.25	5	5	0.5	3	0.5	3	2	3	3	0.5	3	0.5	3	0.5	3	1	6	3.75	0.5	3	1	6	1	6	1	6	1	6	1	6	1	6	4.85714	0.5	3	-2	-0.75	-1.85714	0	-1.15179
LTRL590_350031900.1	LtrL590_35:991,921..993,759(-)	612	1839	hypothetical protein, conserved	3.5	9	7	8	6	7	8	0.5	6	0.5	6	0.4	7	6.33333	7	8	7	8	7	8	7	8	8	0.5	6	7	8	7	8	7	8	7	8	7	8	7	8	7.57143	5	6	-1.66667	-1.66667	-1.2381	0.333333	-1.05952
LTRL590_270027400.1	LtrL590_27:898,399..898,992(-)	197	594	GMP-PDE, delta subunit, putative	0	2	0	2	0	2	2	0	1	0	1	0	1	1	0	2	0	2	0	2	0	2	2	0	1	0	2	0	2	0	2	0	2	0	2	0	2	1.57143	#DIV/0!	0	-1	-1	-0.571429	1	-0.392857
LTRL590_080007000.1	LtrL590_08:71,686..72,570(+)	294	885	Bacterial transferase hexapeptide (six repeats), putative	0	2	0	2	0	2	2	#DIV/0!	1	#DIV/0!	1	0.5	3	1.66667	0	2	0	2	0	2	0	2	2	#DIV/0!	1	0	2	0	2	0	2	0	2	0	2	0	2	1.57143	#DIV/0!	0	-0.333333	-0.333333	0.0952381	1.66667	0.27381
LTRL590_140007800.1	LtrL590_14:84,908..85,426(+)	172	519	hypothetical protein, conserved	0	2	0	2	0	2	2	0	1	0	1	0	3	1.66667	0	2	0	2	0	2	0	2	2	0	1	0	2	0	2	0	2	0	2	0	2	0	2	1.57143	#DIV/0!	0	-0.333333	-0.333333	0.0952381	1.66667	0.27381
LTRL590_210013400.1	LtrL590_21:233,461..233,799(+)	112	339	Domain of unknown function (DUF543), putative	#DIV/0!	0	#DIV/0!	0	#DIV/0!	0	0	0	1	0	1	0	1	1	0	2	0	2	0	2	0	2	2	0	1	0	2	0	2	0	2	0	2	0	2	0	2	1.57143	0	2	1	-1	-0.571429	-1	-0.392857
LTRL590_270019900.1	LtrL590_27:588,876..589,496(+)	162	489	60S acidic ribosomal subunit protein, putative	#DIV/0!	0	#DIV/0!	0	#DIV/0!	0	0	0	1	0	1	0	1	1	0	2	0	2	0	2	0	2	2	0	1	0	2	0	2	0	2	0	2	0	2	0	2	1.57143	0	2	1	-1	-0.571429	-1	-0.392857
LTRL590_230019900.1	LtrL590_23:531,388..531,816(-)	142	429	hypothetical protein	1	2	1	2	1	2	2	0.333333	4	0.333333	4	1	2	3.33333	1	4	1	4	1	4	1	4	4	0.333333	4	1	4	1	4	1	4	1	4	1	4	1	4	3.57143	1	4	1.33333	-0.666667	-0.238095	-0.666667	-0.0595238
LTRL590_190018500.1	LtrL590_19:595,795..596,061(+)	88	267	hypothetical protein, conserved	1	2	1	2	1	2	2	#DIV/0!	2	#DIV/0!	2	#DIV/0!	2	2	3	4	3	4	3	4	3	4	4	#DIV/0!	2	3	4	3	4	3	4	3	4	3	4	3	4	3.57143	3	4	0	-2	-1.57143	-2	-1.39286
LTRL590_360013700.1	LtrL590_36:292,261..292,473(+)	70	213	hypothetical protein	0	1	0	1	0	1	1	1	2	1	2	1	2	2	2	3	2	3	2	3	2	3	3	1	2	2	3	2	3	2	3	2	3	1	2	2	3	2.57143	2	3	1	-1	-0.571429	-1	-0.392857
LTRL590_100010800.1	LtrL590_10:210,886..211,209(-)	107	324	hypothetical protein, conserved	#DIV/0!	0	#DIV/0!	0	#DIV/0!	0	0	0	1	0	1	0	2	1.33333	0	2	0	2	0	2	0	2	2	0	1	0	2	0	2	0	2	0	2	0	2	0	2	1.57143	0	2	1.33333	-0.666667	-0.238095	-0.666667	-0.0595238
LTRL590_190017300.1	LtrL590_19:547,712..548,563(+)	283	852	SPFH domain / Band 7 family, putative	#DIV/0!	0	#DIV/0!	0	#DIV/0!	0	0	0	1	0	1	0	2	1.33333	0	2	0	2	0	2	0	2	2	0	1	0	2	0	2	0	2	0	2	0	2	0	2	1.57143	0	2	1.33333	-0.666667	-0.238095	-0.666667	-0.0595238
LTRL590_070018000.1	LtrL590_07:586,451..586,798(+)	115	348	peptidyl-prolyl cis-trans isomerase/rotamase, putative	#DIV/0!	0	#DIV/0!	0	#DIV/0!	0	0	#DIV/0!	2	#DIV/0!	2	#DIV/0!	1	1.66667	1	2	1	2	1	2	1	2	2	#DIV/0!	2	1	2	#DIV/0!	0	1	2	1	2	1	2	1	2	1.57143	1	2	1.66667	-0.333333	0.0952381	-0.333333	0.27381
LTRL590_150008300.1	LtrL590_15:115,640..116,080(+)	146	441	ecotin, putative	#DIV/0!	0	#DIV/0!	0	#DIV/0!	0	0	0	1	0	1	0.5	3	1.66667	0	2	0	2	0	2	0	2	2	0	1	0	2	0	2	0	2	0	2	0	2	0	2	1.57143	0	2	1.66667	-0.333333	0.0952381	-0.333333	0.27381
LTRL590_180021100.1	LtrL590_18:725,544..726,488(+)	314	945	nonspecific nucleoside hydrolase	1	2	1	2	1	2	2	1	4	1	4	1	4	4	1	4	1	4	1	4	1	4	4	1	4	1	4	1	4	1	4	1	4	1	4	1	4	3.57143	1	4	2	0	0.428571	0	0.607143
LTRL590_120005200.1	LtrL590_12:4,069..4,716(+)	215	648	PITH domain containing protein, putative	0	2	0	2	0	2	2	0.25	5	0.25	5	0.333333	4	4.66667	0	4	0	4	0	4	0	4	4	0.25	5	0	4	0	4	0	4	0	4	0	4	0	4	3.57143	0	4	2.66667	0.666667	1.09524	0.666667	1.27381
LTRL590_180007900.1	LtrL590_18:124,841..125,302(-)	153	462	hypothetical protein, conserved	#DIV/0!	1	2	3	2	3	2.33333	1	8	1	8	3	4	6.66667	3	4	3	4	3	4	3	4	4	1	8	3	4	3	4	3	4	3	4	3	4	3	4	4.42857	#DIV/0!	3	4.33333	2.66667	2.2381	3.66667	3.22619
LTRL590_000010800.1	LTRL590_SCAF000046:274..573(-)	99	300	hypothetical protein, conserved	3	4	2	3	3	4	3.66667	3	4	3	4	2	3	3.66667	2	6	2	6	2	6	1.5	5	5.75	3	4	2	6	1.5	5	2	6	2	6	2	6	2	6	5	3	4	0	-2.08333	-1.33333	-0.333333	-0.9375
LTRL590_280007300.1	LtrL590_28:70,793..71,827(+)	344	1035	hypothetical protein, conserved	0.333333	8	0.333333	8	0.4	7	7.66667	0.25	5	0.25	5	0	2	4	0.333333	8	0.333333	8	0.333333	8	#DIV/0!	0	6	0.25	5	0.333333	8	0.333333	8	0.333333	8	0.333333	8	0.333333	8	0.333333	8	6.47619	0.333333	8	-3.66667	-2	-2.47619	-4	-3.03571
LTRL590_350035300.1	LtrL590_35:1,126,477..1,129,767(-)	1096	3291	pentatricopeptide repeat domain containing protein, putative	0.153846	15	0.142857	16	0.2	18	16.3333	0.5	18	0.5	18	0.5	15	17	0.133333	17	0.133333	17	0.133333	17	0.133333	17	17	0.5	18	0.133333	17	0.133333	17	0.133333	17	0.133333	17	0.133333	17	0.133333	17	14.7333	0.0666667	16	0.666667	0	2.26667	1	0.983333
LTRL590_210013000.1	LtrL590_21:222,844..223,761(-)	305	918	hypothetical protein, conserved	2	3	2	3	2	3	3	1	2	1	2	1	4	2.66667	1.5	5	1.5	5	1.5	5	1.5	5	5	1	2	1.5	5	1.5	5	1.5	5	1.5	5	1.5	5	1.5	5	4.07143	1.5	5	-0.333333	-2.33333	-1.40476	-2.33333	-1.60119
LTRL590_360035000.1	LtrL590_36:1,093,635..1,095,290(-)	551	1656	PCI/PINT associated module, putative	1	6	0.5	3	0.5	3	4	0.5	9	0.5	9	0.5	6	8	0.2	6	0.2	6	0.2	6	0.2	6	6	0.5	9	0.2	6	0.2	6	0.2	6	0.2	6	0.2	6	0.2	6	5.6	0.2	6	4	2	2.4	2	2.6
LTRL590_360049100.1	LtrL590_36:1,501,838..1,502,908(+)	356	1071	eukaryotic translation initiation factor 3 subunit 2, putative	0	2	0	2	0	2	2	0.666667	5	0.666667	5	0.5	3	4.33333	0.333333	4	0.333333	4	0.333333	4	0.333333	4	4	0.666667	5	0.333333	4	0.333333	4	0.333333	4	0.333333	4	0.333333	4	0.333333	4	3.61905	0.333333	4	2.33333	0.333333	0.714286	0.333333	0.928571
LTRL590_350006700.1	LtrL590_35:39,518..40,465(-)	315	948	hypothetical protein, conserved	0.6	8	0.8	9	0.6	8	8.33333	2	3	2	3	#DIV/0!	0	2	0.6	8	0.6	8	0.6	8	0.6	8	8	2	3	0.6	8	0.6	8	0.6	8	0.6	8	0.6	8	0.6	8	6.22857	0.6	8	-6.33333	-6	-4.22857	-6	-5.64048
LTRL590_180012100.1	LtrL590_18:287,429..289,564(+)	711	2136	HEAT repeat, putative	0.666667	5	0.666667	5	0.666667	5	5	0.5	6	0.5	6	0.333333	8	6.66667	0.75	7	0.75	7	0.75	7	0.75	7	7	0.5	6	0.75	7	0.75	7	0.75	7	0.75	7	0.75	7	0.75	7	5.96429	0.25	5	1.66667	-0.333333	0.702381	1.66667	0.925595
LTRL590_340032200.1	LtrL590_34:1,054,218..1,055,066(+)	282	849	hypothetical protein, conserved	2	6	2	6	2	6	6	0.333333	4	0.333333	4	0.2	6	4.66667	2	6	2	6	2	6	1.25	9	6.75	0.333333	4	1.25	9	1.25	9	1.25	9	1.25	9	1.25	9	1.25	9	7.17857	1.5	5	-1.33333	-2.08333	-2.5119	-0.333333	-1.56548
LTRL590_270006400.1	LtrL590_27:33,694..34,149(-)	151	456	WW domain/Zinc finger C-x8-C-x5-C-x3-H type (and similar), putative	0	1	0	1	0	1	1	0.5	3	0.5	3	1	2	2.66667	0.5	3	0.5	3	0.5	3	0.5	3	3	0.5	3	0.5	3	0.5	3	0.5	3	0.5	3	0.5	3	0.5	3	2.64286	0.5	3	1.66667	-0.333333	0.0238095	-0.333333	0.255952
LTRL590_120010800.1	LtrL590_12:300,928..301,218(+)	96	291	hypothetical protein	#DIV/0!	1	#DIV/0!	1	#DIV/0!	1	1	0.5	3	0.5	3	1	4	3.33333	0.5	3	0.5	3	0.5	3	0.5	3	3	0.5	3	0.5	3	0.5	3	0.5	3	0.5	3	0.5	3	0.5	3	2.64286	0.5	3	2.33333	0.333333	0.690476	0.333333	0.922619
LTRL590_350005600.1	LtrL590_35:19,487..20,191(-)	234	705	hypothetical protein	0.166667	7	0.166667	7	0.166667	7	7	0.5	3	0.5	3	0	2	2.66667	0.166667	7	0.166667	7	0.166667	7	#DIV/0!	0	5.25	0.5	3	0.166667	7	0.166667	7	0.166667	7	0.166667	7	0.166667	7	0.166667	7	5.45238	0.166667	7	-4.33333	-2.58333	-2.78571	-4.33333	-3.50893
LTRL590_360072000.1	LtrL590_36:2,341,040..2,341,990(-)	316	951	glycerophosphoryl diester phosphodiesterase, putative	0	4	0.5	3	0.5	3	3.33333	#DIV/0!	3	#DIV/0!	3	1	2	2.66667	0	1	0	1	0	1	0.333333	4	1.75	#DIV/0!	3	0.333333	4	0.333333	4	0.333333	4	0.333333	4	0.333333	4	0.333333	4	3.33333	0.333333	4	-0.666667	0.916667	-0.666667	-1.33333	-0.4375
LTRL590_340034600.1	LtrL590_34:1,159,766..1,160,314(+)	182	549	hypothetical protein, conserved	0	2	0.5	3	0.5	3	2.66667	0	4	0	4	0.333333	4	4	0.5	3	0.5	3	0.5	3	0.25	5	3.5	0	4	0.25	5	0.25	5	0.333333	4	0.25	5	0.25	5	0.25	5	4.19048	0	2	1.33333	0.5	-0.190476	2	0.910714
LTRL590_220012100.1	LtrL590_22:264,610..265,378(+)	256	768	3'a2rel-related protein	1.33333	7	2.5	7	2.5	7	7	1	4	1	4	1	6	4.66667	0.666667	5	0.666667	5	1	4	1	10	6	1	4	1.66667	8	1	8	1	8	1.25	9	1	10	1.25	9	7	1.5	5	-2.33333	-1.33333	-2.33333	-0.333333	-1.58333
LTRL590_320030500.1	LtrL590_32:931,151..932,464(-)	437	1314	C-14 sterol reductase, putative	1	4	1	4	1	4	4	1	4	1	4	1	2	3.33333	1	6	1	6	1	6	1	6	6	1	4	1	6	1	6	1	6	1	6	1	6	1	6	5	1	4	-0.666667	-2.66667	-1.66667	-0.666667	-1.41667
LTRL590_300043900.1	LtrL590_30:1,340,455..1,340,700(+)	81	246	hypothetical protein	0	1	#DIV/0!	0	1	2	1	0.5	3	0.5	3	1	2	2.66667	2	3	2	3	2	3	2	3	3	0.5	3	2	3	2	3	2	3	#DIV/0!	0	#DIV/0!	0	2	3	2	2	3	1.66667	-0.333333	0.666667	-0.333333	0.416667
LTRL590_180022200.1	LtrL590_18:752,455..752,676(+)	73	222	hypothetical protein	0	1	0	1	0	1	1	0.5	3	0.5	3	0	3	3	1	2	1	2	1	2	1	2	2	0.5	3	1	2	1	2	1	2	1	2	1	2	1	2	2	#DIV/0!	0	2	1	1	3	1.75
LTRL590_000024400.1	LTRL590_SCAF000112:157,196..157,735(+)	179	540	BT1 family, putative	1	2	2	3	1.25	9	4.66667	0.6	8	0.6	8	0.5	6	7.33333	0.5	6	0.5	6	0.5	6	0.5	6	6	0.6	8	1	8	1	8	1	8	1	8	1	8	1	8	7	0.5	6	2.66667	1.33333	0.333333	1.33333	1.41667
LTRL590_160010600.1	LtrL590_16:202,535..203,476(-)	313	942	dihydroorotate dehydrogenase (fumarate)	#DIV/0!	0	#DIV/0!	0	#DIV/0!	0	0	0.5	3	0.5	3	0.5	3	3	1	2	1	2	1	2	1	2	2	0.5	3	1	2	1	2	1	2	1	2	1	2	1	2	2	#DIV/0!	1	3	1	1	2	1.75
LTRL590_290013500.1	LtrL590_29:297,226..297,813(-)	195	588	hypothetical protein, conserved	#DIV/0!	0	#DIV/0!	0	#DIV/0!	0	0	0.5	3	0.5	3	1	4	3.33333	1	2	1	2	1	2	1	2	2	0.5	3	1	2	1	2	1	2	1	2	1	2	1	2	2	#DIV/0!	1	3.33333	1.33333	1.33333	2.33333	2.08333
LTRL590_360031800.1	LtrL590_36:972,278..972,757(+)	159	480	hypothetical protein	1	4	1	4	1	4	4	0.5	3	0.5	3	0	2	2.66667	2	6	2	6	2	6	2	6	6	0.5	3	2	6	2	6	2	6	2	6	2	6	2	6	5	2	6	-1.33333	-3.33333	-2.33333	-3.33333	-2.58333
LTRL590_320036800.1	LtrL590_32:1,161,989..1,162,864(-)	291	876	SNAP protein, putative	0	3	0	3	0	3	3	3	8	3	8	0.333333	4	6.66667	0	4	0	4	0	4	0	4	4	3	8	0	4	0	4	0	4	0	4	0	4	0	4	4	0	2	3.66667	2.66667	2.66667	4.66667	3.41667
LTRL590_270018700.1	LtrL590_27:544,233..545,960(+)	575	1728	ubiquitin hydrolase, putative	0.2	6	0.6	8	0.2	6	6.66667	0.125	9	0.125	9	0.375	11	9.66667	0.285714	9	0.285714	9	0.285714	9	0.285714	9	9	0.125	9	0.428571	10	0.285714	9	0.285714	9	0.285714	9	0.285714	9	0.428571	10	8.04082	0.333333	8	3	0.666667	1.62585	1.66667	1.7398
LTRL590_260005900.1	LtrL590_26:19,490..20,560(-)	356	1071	hypothetical protein, conserved	0	4	0	3	0	3	3.33333	0	3	0	3	0.25	5	3.66667	0	5	0	5	0	5	0	2	4.25	0	3	0	5	0	3	0	5	0	5	0	5	0	5	3.71429	0	2	0.333333	-0.583333	-0.047619	1.66667	0.342262
LTRL590_360056100.1	LtrL590_36:1,763,928..1,764,524(+)	198	597	60S ribosomal protein L18, putative	1	2	0	1	0	1	1.33333	0.333333	4	0.333333	4	0	5	4.33333	0	3	0	3	0	2	0	4	3	0.333333	4	0	3	0	4	0	4	0	4	#DIV/0!	0	0	3	2.57143	0	1	3	1.33333	1.7619	3.33333	2.35714
LTRL590_320019300.1	LtrL590_32:509,988..510,587(+)	199	600	RNA polymerase-like protein, putative	0	3	0	3	0	3	3	0.5	3	0.5	3	0	2	2.66667	0.25	5	0.25	5	0.25	5	0.25	5	5	0.5	3	0.25	5	0.25	5	0.25	5	0.25	5	0.25	5	0.25	5	4.03571	0	3	-0.333333	-2.33333	-1.36905	-0.333333	-1.09226
LTRL590_300042600.1	LtrL590_30:1,306,087..1,306,521(+)	144	435	40S ribosomal protein S14	#DIV/0!	0	#DIV/0!	0	#DIV/0!	0	0	1	2	1	2	1	2	2	#DIV/0!	1	1	2	1	2	1	2	1.75	1	2	1	2	1	2	1	2	1	2	#DIV/0!	1	#DIV/0!	1	1.57143	#DIV/0!	0	2	0.25	0.428571	2	1.16964
LTRL590_130018400.1	LtrL590_13:475,850..477,055(-)	401	1206	Beta-lactamase superfamily domain containing protein, putative	0.666667	5	0.666667	5	0.666667	5	5	0	2	0	2	0	2	2	0.666667	5	0.666667	5	0.666667	5	0.666667	5	5	0	2	0.666667	5	0.666667	5	0.666667	5	0.666667	5	0.666667	5	0.666667	5	3.95238	0.5	3	-3	-3	-1.95238	-1	-2.2381
LTRL590_070015200.1	LtrL590_07:418,614..418,919(+)	101	306	cytochrome b5-like protein	#DIV/0!	0	#DIV/0!	0	#DIV/0!	0	0	2	3	2	3	3	4	3.33333	1	2	1	2	1	2	1	2	2	2	3	1	2	#DIV/0!	0	1	2	1	2	1	2	1	2	1.71429	1	2	3.33333	1.33333	1.61905	1.33333	1.90476
LTRL590_320008600.1	LtrL590_32:130,019..131,422(-)	467	1404	hypothetical protein, conserved	0.2	6	0.2	6	0.2	6	6	0.8	9	0.8	9	0.25	5	7.66667	0.333333	8	0.333333	8	0.333333	8	0.333333	8	8	0.8	9	0.333333	8	0.333333	8	0.333333	8	0.333333	8	0.333333	8	0.333333	8	7.04762	0.2	6	1.66667	-0.333333	0.619048	1.66667	0.904762
LTRL590_190008800.1	LtrL590_19:164,624..164,998(+)	124	375	Proteasome maturation factor UMP1, putative	1	2	1	2	1	2	2	0	1	0	1	0	1	1	1	2	1	2	1	2	1	2	2	0	1	1	2	1	2	1	2	1	2	1	2	1	2	1.71429	#DIV/0!	0	-1	-1	-0.714286	1	-0.428571
LTRL590_350054100.1	LtrL590_35:1,768,563..1,768,979(+)	138	417	lipoic acid containing carrier protein, putative	1	2	1	2	1	2	2	#DIV/0!	1	#DIV/0!	1	#DIV/0!	1	1	1	2	1	2	1	2	1	2	2	#DIV/0!	1	1	2	1	2	1	2	1	2	1	2	1	2	1.71429	#DIV/0!	0	-1	-1	-0.714286	1	-0.428571
LTRL590_070009100.1	LtrL590_07:156,307..156,669(-)	120	363	hypothetical protein	1	2	1	2	1	2	2	0	1	0	1	1	2	1.33333	0.333333	4	0.333333	4	0.333333	4	0.333333	4	4	0	1	0.333333	4	0.333333	4	0.333333	4	0.333333	4	0.333333	4	0.333333	4	3.04762	1	2	-0.666667	-2.66667	-1.71429	-0.666667	-1.42857
LTRL590_240005400.1	LtrL590_24:6,406..6,771(+)	121	366	hypothetical protein	#DIV/0!	0	#DIV/0!	0	#DIV/0!	0	0	0.5	3	0	2	0.5	3	2.66667	0	2	0	2	0	2	0	2	2	0	2	0	2	0	2	0	2	0	2	0	2	0	2	1.71429	0	2	2.66667	0.666667	0.952381	0.666667	1.2381
LTRL590_170014100.1	LtrL590_17:396,657..396,995(+)	112	339	META domain containing protein, putative	#DIV/0!	0	#DIV/0!	0	#DIV/0!	0	0	0	1	0	1	1	2	1.33333	1	2	1	2	1	2	1	2	2	0	1	1	2	1	2	1	2	1	2	1	2	1	2	1.71429	1	2	1.33333	-0.666667	-0.380952	-0.666667	-0.0952381
LTRL590_060012600.1	LtrL590_06:290,150..291,166(+)	338	1017	serine-threonine dehydratase, putative	1	2	1	2	1	2	2	0.25	5	0.25	5	0.5	3	4.33333	1	4	1	4	1	4	1	4	4	0.25	5	1	4	1	4	1	4	1	4	1	4	1	4	3.71429	1	4	2.33333	0.333333	0.619048	0.333333	0.904762
LTRL590_220015300.1	LtrL590_22:415,879..417,145(+)	422	1266	Beta-lactamase superfamily domain containing protein, putative	3	4	3	4	3	4	4	1	2	1	2	2	6	3.33333	3	4	3	4	3	4	3	4	4	1	2	4	5	3	4	3	4	3	4	2	3	4	5	3.71429	1	2	-0.666667	-0.666667	-0.380952	1.33333	-0.0952381
LTRL590_140005300.1	LtrL590_14:16,954..17,529(+)	191	576	ADP-ribosylation factor family, putative	0	2	0	2	0	2	2	1	2	1	2	0	1	1.66667	0	2	0	2	0	2	0	2	2	1	2	0	2	0	2	0	2	0	2	0	2	0	2	1.71429	#DIV/0!	0	-0.333333	-0.333333	-0.047619	1.66667	0.238095
LTRL590_190012600.1	LtrL590_19:341,748..342,506(+)	252	759	hypothetical protein, conserved	0	2	0	2	0	2	2	0	2	0	2	0.5	3	2.33333	0	2	0	2	0	2	0	2	2	0	2	0	2	0	2	0	2	0	2	0	2	0	2	1.71429	#DIV/0!	0	0.333333	0.333333	0.619048	2.33333	0.904762
LTRL590_290031100.1	LtrL590_29:1,070,887..1,071,441(-)	184	555	Nucleosome assembly protein (NAP), putative	#DIV/0!	2	#DIV/0!	2	#DIV/0!	2	2	#DIV/0!	3	#DIV/0!	3	#DIV/0!	3	3	3	4	3	4	3	4	3	4	4	#DIV/0!	3	3	4	3	4	3	4	3	4	3	4	3	4	3.71429	3	4	1	-1	-0.714286	-1	-0.428571
LTRL590_300032000.1	LtrL590_30:964,688..965,281(-)	197	594	reticulon domain protein, 22 kDa potentially aggravating protein (paple22)	#DIV/0!	0	#DIV/0!	0	#DIV/0!	0	0	1	2	1	2	0	1	1.66667	0	2	0	2	0	2	0	2	2	1	2	0	2	0	2	0	2	0	2	0	2	0	2	1.71429	0	2	1.66667	-0.333333	-0.047619	-0.333333	0.238095
LTRL590_000006800.1	LTRL590_SCAF000021:6,372..6,695(+)	107	324	translation factor sui1, putative	#DIV/0!	0	#DIV/0!	0	#DIV/0!	0	0	0	2	0	2	0	2	2	0	2	0	2	0	2	0	2	2	0	2	0	2	0	2	0	2	0	2	0	2	0	2	1.71429	0	2	2	0	0.285714	0	0.571429
LTRL590_260012300.1	LtrL590_26:224,022..224,498(-)	158	477	RNA recognition motif. (a.k.a. RRM, RBD, or RNP domain), putative	#DIV/0!	0	#DIV/0!	0	#DIV/0!	0	0	0	2	0	2	0	2	2	0	2	0	2	0	2	0	2	2	0	2	0	2	0	2	0	2	0	2	0	2	0	2	1.71429	0	2	2	0	0.285714	0	0.571429
LTRL590_300034800.1	LtrL590_30:1,038,709..1,039,023(-)	104	315	hypothetical protein, conserved	#DIV/0!	0	#DIV/0!	0	#DIV/0!	0	0	0	2	0	2	0	2	2	0	2	0	2	0	2	0	2	2	0	2	0	2	0	2	0	2	0	2	0	2	0	2	1.71429	0	2	2	0	0.285714	0	0.571429
LTRL590_060008100.1	LtrL590_06:101,321..101,830(-)	169	510	MYND finger domain-like protein	#DIV/0!	0	#DIV/0!	0	#DIV/0!	0	0	0	2	0	2	0.5	3	2.33333	0	2	0	2	0	2	0	2	2	0	2	0	2	0	2	0	2	0	2	0	2	0	2	1.71429	0	2	2.33333	0.333333	0.619048	0.333333	0.904762
LTRL590_240016100.1	LtrL590_24:356,787..357,425(+)	212	639	dynein light chain, putative	#DIV/0!	0	#DIV/0!	0	#DIV/0!	0	0	0	2	0	2	0	3	2.33333	0	2	0	2	0	2	0	2	2	0	2	0	2	0	2	0	2	0	2	0	2	0	2	1.71429	0	2	2.33333	0.333333	0.619048	0.333333	0.904762
LTRL590_320047000.1	LtrL590_32:1,516,757..1,517,830(+)	357	1074	hypothetical protein, conserved	1	2	2	3	2	3	2.66667	1	6	1	6	2	6	6	1	4	1	4	1	4	1	4	4	1	6	1	4	1	4	1	4	1	4	1	4	1	4	3.85714	1	2	3.33333	2	2.14286	4	2.86905
LTRL590_320024900.1	LtrL590_32:707,246..707,980(-)	244	735	hypothetical protein, conserved	4	5	3	4	4	5	4.66667	5	6	5	6	#DIV/0!	6	6	5	6	5	6	5	6	5	6	6	5	6	5	6	5	6	5	6	5	6	5	6	5	6	5.85714	3	4	1.33333	0	0.142857	2	0.869048
LTRL590_200010400.1	LtrL590_20:171,299..171,568(+)	89	270	hypothetical protein, conserved	2	3	#DIV/0!	2	#DIV/0!	3	2.66667	4	5	4	5	0.5	3	4.33333	1.5	5	1	4	1	4	2	3	4	4	5	0.666667	5	2	3	1	6	1	4	1	4	0.666667	5	3.85714	#DIV/0!	2	1.66667	0.333333	0.47619	2.33333	1.20238
LTRL590_150012900.1	LtrL590_15:306,858..307,358(+)	166	501	hypothetical protein	0	1	0	1	#DIV/0!	0	0.666667	#DIV/0!	2	#DIV/0!	2	#DIV/0!	3	2.33333	1	2	1	2	1	2	1	2	2	#DIV/0!	2	1	2	1	2	1	2	1	2	1	2	1	2	1.85714	#DIV/0!	0	1.66667	0.333333	0.47619	2.33333	1.20238
LTRL590_280036000.1	LtrL590_28:1,122,142..1,123,533(-)	463	1392	hypothetical protein, conserved	0.25	10	0.285714	9	0.375	11	10	0.333333	8	0.333333	8	0.6	8	8	0.428571	10	0.428571	10	0.428571	10	#DIV/0!	1	7.75	0.333333	8	0.428571	10	0.428571	10	0.428571	10	0.428571	10	0.428571	10	0.428571	10	8.34694	0.5	9	-2	0.25	-0.346939	-1	-0.774235
LTRL590_340029000.1	LtrL590_34:918,531..918,947(-)	138	417	hypothetical protein, conserved	0	1	1	2	0	1	1.33333	0	2	0	2	0.5	6	3.33333	0	1	0	1	0	1	0.333333	4	1.75	0	2	0.333333	4	0.333333	4	0.333333	4	0.333333	4	0.333333	4	0.333333	4	3.19048	0	1	2	1.58333	0.142857	2.33333	1.51488
LTRL590_220019100.1	LtrL590_22:549,791..550,558(-)	255	768	Mitochondrial glycoprotein, putative	0.5	3	0.333333	4	0.333333	4	3.66667	0.5	6	0.5	6	0.333333	4	5.33333	0.2	6	0.2	6	0.2	6	0.2	6	6	0.5	6	0.2	6	0.2	6	0.2	6	0.2	6	0.2	6	0.2	6	5.17143	0.25	5	1.66667	-0.666667	0.161905	0.333333	0.37381
LTRL590_280025500.1	LtrL590_28:754,506..755,372(-)	288	867	Domain of unknown function (DUF4586), putative	0.666667	5	0.5	6	0.666667	5	5.33333	#DIV/0!	0	#DIV/0!	0	#DIV/0!	0	0	0.5	6	0.5	6	0.5	6	#DIV/0!	0	4.5	#DIV/0!	0	0.5	6	0.5	6	0.5	6	0.5	6	0.5	6	0.5	6	4.35714	0.5	3	-5.33333	-4.5	-4.35714	-3	-4.29762
LTRL590_000022500.1	LTRL590_SCAF000112:79,842..81,065(+)	407	1224	mitogen-activated protein kinase, putative	#DIV/0!	1	#DIV/0!	0	#DIV/0!	1	0.666667	0	1	0	1	1	2	1.33333	#DIV/0!	0	#DIV/0!	0	#DIV/0!	0	0	3	0.75	0	1	0	3	0	3	0	3	0	3	0	3	0	3	2.28571	#DIV/0!	0	0.666667	0.583333	-0.952381	1.33333	0.407738
LTRL590_360038800.1	LtrL590_36:1,226,339..1,226,737(-)	132	399	hypothetical protein, conserved	0	3	0	3	0	3	3	1	2	1	2	1	2	2	0.25	5	0.25	5	0.25	5	0.25	5	5	1	2	0.25	5	0.25	5	0.25	5	0.25	5	0.25	5	0.25	5	3.89286	0.25	5	-1	-3	-1.89286	-3	-2.22321
LTRL590_320012000.1	LtrL590_32:231,722..232,570(+)	282	849	AKAP7 2'5' RNA ligase-like domain containing protein, putative	0.5	3	0.5	3	0.333333	4	3.33333	0.2	6	0.166667	7	0	5	6	0.25	5	0.25	5	0.25	5	0.25	5	5	0.166667	7	0.25	5	0.25	5	0.25	5	0.25	5	0.25	5	0.25	5	4.60714	0.5	3	2.66667	1	1.39286	3	2.01488
LTRL590_360031100.1	LtrL590_36:948,826..949,803(+)	325	978	mitochondrial RNA binding complex 1 subunit, putative	0.5	3	0.5	3	0.5	3	3	0	2	0	2	0	3	2.33333	0.25	5	0.25	5	0.25	5	0.25	5	5	0	2	0.25	5	0.25	5	0.25	5	0.25	5	0.25	5	0.25	5	3.89286	0.25	5	-0.666667	-2.66667	-1.55952	-2.66667	-1.88988
LTRL590_220020800.1	LtrL590_22:618,486..619,299(+)	271	813	hypothetical protein	0.5	3	0.5	3	0.5	3	3	0	1	0	1	0	2	1.33333	0.5	3	1	4	1	2	0.5	3	3	0	1	0.5	3	1	4	0.5	3	1	4	0.5	3	1	4	2.78571	#DIV/0!	1	-1.66667	-1.66667	-1.45238	0.333333	-1.1131
LTRL590_310024600.1	LtrL590_31:816,424..816,795(-)	123	372	hypothetical protein, conserved	0	1	0	1	0	1	1	0.333333	4	0.333333	4	0.333333	4	4	0.5	3	0.5	3	0.5	3	0.5	3	3	0.333333	4	0.5	3	0.5	3	0.5	3	0.5	3	0.5	3	0.5	3	2.78571	0.5	3	3	1	1.21429	1	1.55357
LTRL590_290019900.1	LtrL590_29:565,316..565,675(+)	119	360	DSS1/SEM1 family, putative	2	3	1	2	2	3	2.66667	3	4	3	4	1.5	5	4.33333	1.5	5	1.5	5	1.5	5	1.5	5	5	3	4	1.5	5	1.5	5	1.5	5	1.5	5	1	4	1.5	5	4.21429	1	4	1.66667	-0.666667	0.119048	0.333333	0.363095
LTRL590_310009900.1	LtrL590_31:134,380..135,534(-)	384	1155	hypothetical protein, conserved	0.666667	5	1	8	1.25	9	7.33333	0.4	7	0.4	7	0	6	6.66667	0	6	0	7	0	6	0	6	6.25	0.4	7	0	6	0	7	0	6	0	6	0	4	0	6	5.14286	0	7	-0.666667	0.416667	1.52381	-0.333333	0.235119
LTRL590_130017300.1	LtrL590_13:432,310..433,290(-)	326	981	XPA-interacting protein, putative	0.5	6	1	6	1	6	6	0	2	0.5	3	#DIV/0!	0	1.66667	1	6	1	6	1	6	1	6	6	0.5	3	1	6	1	6	1	6	1	6	1	6	1	6	4.85714	0.333333	4	-4.33333	-4.33333	-3.19048	-2.33333	-3.54762
LTRL590_300012600.1	LtrL590_30:228,430..229,227(-)	265	798	hypothetical protein, conserved	1	4	1	4	1	4	4	#DIV/0!	2	#DIV/0!	2	#DIV/0!	2	2	2	6	2	6	2	6	2	6	6	#DIV/0!	2	2	6	2	6	2	6	2	6	2	6	2	6	4.85714	2	6	-2	-4	-2.85714	-4	-3.21429
LTRL590_080008200.1	LtrL590_08:107,918..108,676(+)	252	759	Isochorismatase family, putative	2	6	2	6	2	6	6	0	2	0	2	2	3	2.33333	2	6	2	6	2	6	2	6	6	0	2	2	6	2	6	2	6	2	6	2	6	2	6	4.85714	1	4	-3.66667	-3.66667	-2.52381	-1.66667	-2.88095
LTRL590_280036100.1	LtrL590_28:1,125,540..1,126,514(-)	324	975	cytosolic malate dehydrogenase	0.25	5	0.333333	4	0.333333	4	4.33333	1	4	1	4	#DIV/0!	1	3	0.333333	4	0.333333	4	0.333333	4	#DIV/0!	0	3	1	4	0.333333	4	0.333333	4	0.333333	4	0.333333	4	0.333333	4	0.333333	4	3.47619	1	2	-1.33333	0	-0.47619	1	-0.202381
LTRL590_250027500.1	LtrL590_25:786,833..787,744(-)	303	912	hypothetical protein, conserved	0.666667	5	0.333333	4	0.25	5	4.66667	0.25	5	0.25	5	0.142857	8	6	0.166667	7	0.166667	7	0	4	0.166667	7	6.25	0.25	5	0.166667	7	0.333333	8	0.166667	7	0.166667	7	0.166667	7	0.166667	7	5.88095	0.166667	7	1.33333	-0.25	0.119048	-1	0.0505952
LTRL590_050009600.1	LtrL590_05:173,635..174,657(+)	340	1023	nuclear receptor binding factor-like protein	0.5	3	0.666667	5	0.5	3	3.66667	0.666667	5	0.666667	5	0.333333	4	4.66667	0.5	6	0.5	6	0.5	6	0.5	3	5.25	0.666667	5	0.5	6	0.5	6	0.5	6	0.5	6	0.5	6	0.5	6	5.07143	0.5	6	1	-0.583333	-0.404762	-1.33333	-0.330357
LTRL590_050015100.1	LtrL590_05:391,895..392,968(-)	357	1074	stomatin-like protein	3	4	#DIV/0!	4	#DIV/0!	3	3.66667	0	3	0	3	0	4	3.33333	1	6	1	6	1	6	#DIV/0!	3	5.25	0	3	1	6	1	6	1	6	1	6	1	6	1	6	4.85714	1	6	-0.333333	-1.91667	-1.52381	-2.66667	-1.61012
LTRL590_140013400.1	LtrL590_14:312,611..313,744(-)	321	966	fatty acid elongase, putative	0.333333	4	0.666667	5	1	4	4.33333	2.33333	10	2.33333	10	1.66667	8	9.33333	0.5	3	1.5	5	3	4	1	6	4.5	2.33333	10	1	6	1.5	5	1.5	5	1.5	5	0.333333	4	1	6	5.35714	2	3	5	4.83333	3.97619	6.33333	5.03571
LTRL590_260008000.1	LtrL590_26:78,064..79,092(-)	342	1029	Inosine-uridine preferring nucleoside hydrolase, putative	1.5	5	1.5	5	1	8	6	2	9	2	9	2.66667	11	9.66667	1.66667	8	1.66667	8	1.66667	8	2	3	6.75	2	9	1.66667	8	1.66667	8	1.66667	8	1.66667	8	1.66667	8	1.66667	8	7.2381	1.5	5	3.66667	2.91667	2.42857	4.66667	3.41964
LTRL590_280015000.1	LtrL590_28:345,101..346,336(+)	411	1236	hypothetical protein, conserved	1	6	0.666667	5	0.666667	5	5.33333	0.25	5	0.25	5	0	2	4	1	4	1	4	1	4	#DIV/0!	0	3	0.25	5	1	4	1	4	1	4	1	4	1	4	1	4	3.71429	1	4	-1.33333	1	0.285714	0	-0.0119048
LTRL590_360046900.1	LtrL590_36:1,433,587..1,434,054(+)	155	468	calmodulin, putative	0	1	0	2	0	2	1.66667	0	3	0	3	0	2	2.66667	0	4	0	4	0	4	0	4	4	0	3	0	4	0	4	0	4	0	4	0	4	0	4	3.28571	0	3	1	-1.33333	-0.619048	-0.333333	-0.321429
LTRL590_230023300.1	LtrL590_23:664,326..664,901(+)	191	576	mitochondrial carrier protein-like protein	1	4	1	2	0.333333	4	3.33333	#DIV/0!	1	#DIV/0!	1	1	4	2	1	2	1	2	1	2	1	2	2	#DIV/0!	1	1	2	1	2	1	2	1	2	1	2	1	2	1.71429	#DIV/0!	1	-1.33333	0	0.285714	1	-0.0119048
LTRL590_140007000.1	LtrL590_14:62,496..62,714(+)	72	219	hypothetical protein	1	2	1	2	1	2	2	1	2	1	2	1	2	2	1	2	1	2	1	2	1	2	2	1	2	1	2	1	2	1	2	1	2	1	2	1	2	1.85714	#DIV/0!	0	0	0	0.142857	2	0.535714
LTRL590_320017000.1	LtrL590_32:426,136..426,750(+)	204	615	vacuolar sorting-like protein	1	4	1	4	1	4	4	0.666667	5	0.666667	5	0.666667	5	5	2	6	2	6	2	6	2	6	6	0.666667	5	2	6	2	6	2	6	#DIV/0!	2	#DIV/0!	2	2	6	4.14286	1	4	1	-1	0.857143	1	0.464286
LTRL590_160011900.1	LtrL590_16:252,871..253,188(-)	105	318	RING-H2 zinc finger containing protein, putative	#DIV/0!	0	#DIV/0!	0	#DIV/0!	0	0	1	2	1	2	1	2	2	1	2	1	2	1	2	1	2	2	1	2	1	2	1	2	1	2	1	2	1	2	1	2	1.85714	1	2	2	0	0.142857	0	0.535714
LTRL590_160022800.1	LtrL590_16:669,770..670,111(-)	113	342	hypothetical protein, conserved	#DIV/0!	0	#DIV/0!	0	#DIV/0!	0	0	1	2	1	2	1	2	2	1	2	1	2	1	2	1	2	2	1	2	1	2	1	2	1	2	1	2	1	2	1	2	1.85714	1	2	2	0	0.142857	0	0.535714
LTRL590_210007700.1	LtrL590_21:77,223..77,687(+)	154	465	calmodulin-like protein	#DIV/0!	0	#DIV/0!	0	#DIV/0!	0	0	1	2	1	2	1	2	2	1	2	1	2	1	2	1	2	2	1	2	1	2	1	2	1	2	1	2	1	2	1	2	1.85714	1	2	2	0	0.142857	0	0.535714
LTRL590_210019100.1	LtrL590_21:467,129..467,314(-)	61	186	hypothetical protein	#DIV/0!	0	#DIV/0!	0	#DIV/0!	0	0	0	2	0	2	0	2	2	1	2	1	2	1	2	1	2	2	0	2	1	2	1	2	1	2	1	2	1	2	1	2	1.85714	1	2	2	0	0.142857	0	0.535714
LTRL590_260012500.1	LtrL590_26:228,119..228,331(-)	70	213	hypothetical protein	#DIV/0!	0	#DIV/0!	0	#DIV/0!	0	0	1	2	1	2	1	2	2	1	2	1	2	1	2	1	2	2	1	2	1	2	1	2	1	2	1	2	1	2	1	2	1.85714	1	2	2	0	0.142857	0	0.535714
LTRL590_260014900.1	LtrL590_26:308,152..308,346(-)	64	195	hypothetical protein, conserved	#DIV/0!	0	#DIV/0!	0	#DIV/0!	0	0	1	2	1	2	1	2	2	1	2	1	2	1	2	1	2	2	1	2	1	2	1	2	1	2	1	2	1	2	1	2	1.85714	1	2	2	0	0.142857	0	0.535714
LTRL590_320013600.1	LtrL590_32:285,413..285,910(+)	165	498	hypothetical protein, conserved	1	2	1	2	1	2	2	0	2	0	2	0	2	2	0.333333	4	0.333333	4	0.333333	4	0.333333	4	4	0	2	0.333333	4	0.333333	4	0.333333	4	0.333333	4	0.333333	4	0.333333	4	3.19048	1	2	0	-2	-1.19048	0	-0.797619
LTRL590_310006500.1	LtrL590_31:29,899..30,144(-)	81	246	hypothetical protein	#DIV/0!	0	#DIV/0!	0	#DIV/0!	0	0	0	2	0	2	0	1	1.66667	1	2	1	2	1	2	1	2	2	0	2	1	2	1	2	1	2	1	2	1	2	1	2	1.85714	1	2	1.66667	-0.333333	-0.190476	-0.333333	0.202381
LTRL590_270020400.1	LtrL590_27:598,036..598,221(-)	61	186	hypothetical protein	#DIV/0!	1	0	1	1	2	1.33333	1.5	5	1.5	5	#DIV/0!	2	4	1	2	1	2	1	2	1	2	2	1.5	5	1	2	1	2	1	2	1	2	0	1	1	2	2.14286	#DIV/0!	0	2.66667	2	1.85714	4	2.63095
LTRL590_140012700.1	LtrL590_14:274,366..275,223(-)	285	858	fatty acid elongase, putative	0	2	0	2	0	2	2	0.5	3	0.5	3	1	2	2.66667	0	2	0	2	0	2	0	2	2	0.5	3	0	2	0	2	0	2	0	2	0	2	0	2	1.85714	#DIV/0!	0	0.666667	0.666667	0.809524	2.66667	1.20238
LTRL590_330037800.1	LtrL590_33:1,209,320..1,209,667(+)	115	348	hypothetical protein, conserved	#DIV/0!	0	#DIV/0!	0	#DIV/0!	0	0	1	2	1	2	0.5	3	2.33333	1	2	1	2	1	2	1	2	2	1	2	1	2	1	2	1	2	1	2	1	2	1	2	1.85714	1	2	2.33333	0.333333	0.47619	0.333333	0.869048
LTRL590_360036700.1	LtrL590_36:1,145,018..1,145,284(-)	88	267	hypothetical protein	#DIV/0!	0	#DIV/0!	0	#DIV/0!	0	0	0	3	0	3	0	1	2.33333	0	2	0	2	0	2	0	2	2	0	3	0	2	0	2	0	2	0	2	0	2	0	2	1.85714	0	2	2.33333	0.333333	0.47619	0.333333	0.869048
LTRL590_360079800.1	LtrL590_36:2,599,626..2,599,991(-)	121	366	hypothetical protein, conserved	#DIV/0!	0	#DIV/0!	0	#DIV/0!	0	0	1	2	1	2	2	3	2.33333	1	2	1	2	1	2	1	2	2	1	2	1	2	1	2	1	2	1	2	1	2	1	2	1.85714	1	2	2.33333	0.333333	0.47619	0.333333	0.869048
LTRL590_300037000.1	LtrL590_30:1,119,288..1,120,364(-)	358	1077	MORN repeat, putative	#DIV/0!	0	#DIV/0!	0	#DIV/0!	0	0	0	3	0	3	0	4	3.33333	0	2	0	2	0	2	0	2	2	0	3	0	2	0	2	0	2	0	2	0	2	0	2	1.85714	0	2	3.33333	1.33333	1.47619	1.33333	1.86905
LTRL590_250022600.1	LtrL590_25:623,055..623,363(-)	102	309	Tim10/DDP family zinc finger containing protein, putative	#DIV/0!	0	#DIV/0!	0	#DIV/0!	0	0	1	2	1	2	1	4	2.66667	1	2	1	2	1	2	1	2	2	1	2	1	2	1	2	1	2	1	2	1	2	1	2	1.85714	1	2	2.66667	0.666667	0.809524	0.666667	1.20238
LTRL590_300043300.1	LtrL590_30:1,324,048..1,324,722(+)	224	675	V-type ATPase, C subunit, putative	#DIV/0!	0	#DIV/0!	0	#DIV/0!	0	0	0	3	0	3	1	2	2.66667	0	2	0	2	0	2	0	2	2	0	3	0	2	0	2	0	2	0	2	0	2	0	2	1.85714	0	2	2.66667	0.666667	0.809524	0.666667	1.20238
LTRL590_200005000.1	LtrL590_20:1,372..4,770(-)	1132	3399	DNA-directed RNA polymerase polypeptide, putative	0.25	10	0.125	9	0.25	10	9.66667	0.0833333	13	0.0833333	13	0.0909091	12	12.6667	0.2	12	0.2	12	0.2	12	0.142857	8	11	0.0833333	13	0.2	12	0.2	12	0.2	12	0.2	12	0.2	12	0.2	12	10.4571	0.2	12	3	1.66667	2.20952	0.666667	1.88571
LTRL590_300010100.1	LtrL590_30:150,177..151,043(-)	288	867	Ribosome recycling factor, putative	0	2	0.666667	5	0	1	2.66667	0.666667	5	0.666667	5	0.25	5	5	0.25	5	0.25	5	0.25	5	0.25	5	5	0.666667	5	0.25	5	0.25	5	0.25	5	0.25	5	0.25	5	0.25	5	4.32143	0.333333	4	2.33333	0	0.678571	1	1.00298
LTRL590_330030400.1	LtrL590_33:917,688..918,542(+)	284	855	hypothetical protein, conserved	1	2	1	2	1	2	2	1	4	1	4	1	6	4.66667	3	4	3	4	3	4	#DIV/0!	2	3.5	1	4	3	4	3	4	3	4	3	4	3	4	3	4	3.85714	1	2	2.66667	1.16667	0.809524	2.66667	1.82738
LTRL590_290007600.1	LtrL590_29:83,381..84,028(-)	215	648	hypothetical protein, conserved	#DIV/0!	0	#DIV/0!	0	#DIV/0!	0	0	3	4	3	4	1	2	3.33333	1	2	1	2	1	2	#DIV/0!	0	1.5	3	4	1	2	1	2	1	2	1	2	1	2	1	2	2.14286	1	2	3.33333	1.83333	1.19048	1.33333	1.92262
LTRL590_320005900.1	LtrL590_32:30,976..31,203(-)	75	228	Clathrin adaptor complex small chain, putative	1	2	1	2	1	2	2	5	6	5	6	#DIV/0!	3	5	1	4	1	4	1	4	1	2	3.5	5	6	1	4	1	4	1	4	1	4	1	4	1	4	3.85714	1	2	3	1.5	1.14286	3	2.16071
LTRL590_230013600.1	LtrL590_23:246,122..246,595(-)	157	474	Zn-finger in Ran binding protein and others/Putative tRNA binding domain containing protein, putative	0	1	0	1	0	1	1	0.5	3	0.5	3	0.5	3	3	0.5	3	0.5	3	0.5	3	1	2	2.75	0.5	3	0.5	3	0.5	3	0.5	3	0.5	3	0.5	3	0.5	3	2.64286	0	1	2	0.25	0.357143	2	1.15179
LTRL590_210012500.1	LtrL590_21:206,830..207,840(-)	336	1011	metallo-beta-lactamase family-like protein	0	1	0	1	0.5	3	1.66667	0.666667	5	0.666667	5	2	3	4.33333	0.5	3	0.5	3	0.5	3	0.5	3	3	0.666667	5	0.5	3	0.5	3	0.5	3	0.5	3	0.5	3	0.5	3	2.92857	#DIV/0!	1	2.66667	1.33333	1.40476	3.33333	2.18452
LTRL590_080015200.1	LtrL590_08:402,688..403,953(+)	421	1266	hypothetical protein, conserved	0.666667	5	0.4	7	0.75	7	6.33333	0.4	7	0.4	7	1	4	6	0.666667	5	0.666667	5	0.666667	5	0.666667	5	5	0.4	7	0.666667	5	0.666667	5	0.666667	5	0.666667	5	0.666667	5	0.666667	5	4.66667	0.333333	4	-0.333333	1	1.33333	2	1
LTRL590_270030700.1	LtrL590_27:1,021,477..1,022,421(-)	314	945	protein phosphatase-like protein	1	2	#DIV/0!	1	1	2	1.66667	0	3	0	3	0	3	3	0.333333	4	0.333333	4	0.333333	4	0.333333	4	4	0	3	0.333333	4	0.333333	4	0.333333	4	0.333333	4	0.333333	4	0.333333	4	3.33333	0	3	1.33333	-1	-0.333333	0	-5.55112e-17
LTRL590_260020400.1	LtrL590_26:550,255..550,911(+)	218	657	RNA recognition motif. (a.k.a. RRM, RBD, or RNP domain), putative	0.333333	4	1	4	0.333333	4	4	0.5	3	0.5	3	0.5	3	3	0.5	6	0.5	6	0.5	6	0.5	6	6	0.5	3	0.5	6	0.5	6	0.5	6	0.5	6	0.5	6	0.5	6	4.78571	0.5	6	-1	-3	-1.78571	-3	-2.19643
LTRL590_230021900.1	LtrL590_23:596,771..597,580(+)	269	810	hypothetical protein, conserved	1.5	5	1.5	5	1.5	5	5	3	4	3	4	4	5	4.33333	1.33333	7	1.33333	7	1.33333	7	1.33333	7	7	3	4	1.33333	7	1.33333	7	1.33333	7	1.33333	7	1.33333	7	1.33333	7	5.7619	1.33333	7	-0.666667	-2.66667	-1.42857	-2.66667	-1.85714
LTRL590_000013800.1	LTRL590_SCAF000075:497..1,473(+)	325	975	hypothetical protein, conserved	1.66667	8	#DIV/0!	3	4	5	5.33333	3	8	3	8	4	10	8.66667	6	7	3	8	2.5	7	3	8	7.5	3	8	3	8	3	8	3	8	3	8	3	8	3	8	7.28571	6	7	3.33333	1.16667	1.38095	1.66667	1.8869
LTRL590_360067500.1	LtrL590_36:2,190,172..2,190,879(-)	235	708	emp24/gp25L/p24 family/GOLD, putative	0	1	0	1	0	1	1	#DIV/0!	4	#DIV/0!	4	3	4	4	#DIV/0!	2	#DIV/0!	2	#DIV/0!	2	2	3	2.25	#DIV/0!	4	2	3	2	3	2	3	2	3	2	3	2	3	3	0	1	3	1.75	1	3	2.1875
LTRL590_290021400.1	LtrL590_29:692,830..694,401(-)	523	1572	hypothetical protein, conserved	1	2	1	2	3	4	2.66667	0	5	0	5	0.333333	4	4.66667	2	3	2	3	2	3	2	3	3	0	5	2	3	2	3	2	3	2	3	2	3	2	3	3.14286	#DIV/0!	1	2	1.66667	1.52381	3.66667	2.21429
LTRL590_350036100.1	LtrL590_35:1,151,901..1,152,326(-)	141	426	trypanothione-dependent glyoxalase I	1	2	1	2	0	1	1.66667	0.333333	4	0.333333	4	0	1	3	1	2	1	2	1	2	1	2	2	0.333333	4	1	2	1	2	1	2	1	2	1	2	1	2	2.14286	#DIV/0!	0	1.33333	1	0.857143	3	1.54762
LTRL590_240019800.1	LtrL590_24:494,520..494,987(+)	155	468	Zinc finger, C3HC4 type (RING finger) containing protein, putative	#DIV/0!	1	#DIV/0!	1	#DIV/0!	1	1	0	5	0	5	0.333333	4	4.66667	0.5	3	0.5	3	0.5	3	0.5	3	3	0	5	0.5	3	0.5	3	0.5	3	0.5	3	0.5	3	0.5	3	2.92857	0.5	3	3.66667	1.66667	1.7381	1.66667	2.18452
LTRL590_140022500.1	LtrL590_14:675,215..675,637(+)	140	423	mitochondrial pyruvate carrier protein 2, putative	1	2	1	2	1	2	2	#DIV/0!	0	#DIV/0!	0	#DIV/0!	0	0	1	2	1	2	1	2	1	2	2	#DIV/0!	0	1	2	0.5	3	0.5	3	0.5	3	0.5	3	1	2	1.92857	#DIV/0!	0	-2	-2	-1.92857	0	-1.48214
LTRL590_050014400.1	LtrL590_05:376,619..377,731(-)	370	1113	3-mercaptopyruvate sulfurtransferase	1	6	0.666667	5	1	6	5.66667	0.5	6	0.5	6	0.666667	5	5.66667	0.8	9	0.8	9	0.8	9	0.666667	5	8	0.5	6	0.8	9	0.8	9	0.8	9	0.8	9	0.8	9	0.8	9	7.4	0.4	7	0	-2.33333	-1.73333	-1.33333	-1.35
LTRL590_010013500.1	LtrL590_01:267,784..267,966(+)	60	183	hypothetical protein	#DIV/0!	0	#DIV/0!	0	#DIV/0!	0	0	1	2	1	2	1	2	2	#DIV/0!	0	#DIV/0!	0	#DIV/0!	0	1	2	0.5	1	2	1	2	1	2	1	2	1	2	1	2	1	2	1.85714	1	2	2	1.5	0.142857	0	0.910714
LTRL590_090014000.1	LtrL590_09:328,637..329,461(-)	274	825	ras family protein-like protein	0	2	0	2	0	2	2	0.5	3	0.5	3	0	2	2.66667	#DIV/0!	0	#DIV/0!	0	#DIV/0!	0	0	2	0.5	0.5	3	0	2	0	2	0	2	0	2	0	2	0	2	1.85714	#DIV/0!	0	0.666667	2.16667	0.809524	2.66667	1.57738
LTRL590_340005200.1	LtrL590_34:10,486..11,256(+)	256	771	protein kinase, putative	0	2	0	3	0	2	2.33333	0	5	0.2	6	0	5	5.33333	0	4	0	4	0	4	0	4	4	0.2	6	0	4	0	4	0	4	0	4	0	4	0	4	3.71429	0	2	3	1.33333	1.61905	3.33333	2.32143
LTRL590_060006500.1	LtrL590_06:59,657..60,082(-)	141	426	Trm112p-like protein, putative	0	2	0	2	0	2	2	#DIV/0!	2	#DIV/0!	2	#DIV/0!	2	2	1	4	1	4	1	4	1	4	4	#DIV/0!	2	1	4	1	4	1	4	1	4	1	4	1	4	3.28571	0	2	0	-2	-1.28571	0	-0.821429
LTRL590_350017700.1	LtrL590_35:463,914..466,457(+)	847	2544	hypothetical protein, conserved	2	15	2.25	13	2.25	13	13.6667	0.833333	11	0.833333	11	0.5	9	10.3333	2.5	14	2.5	14	2.5	14	2.5	14	14	0.833333	11	2.5	14	2.5	14	2.5	14	2.5	14	2.5	14	2.5	14	11.9286	2.5	14	-3.33333	-3.66667	-1.59524	-3.66667	-3.06548
LTRL590_100007500.1	LtrL590_10:100,326..101,450(-)	374	1125	hypothetical protein, conserved	2	3	2	3	2	3	3	0.666667	5	0.666667	5	0.666667	5	5	0.5	3	0.5	3	0.5	3	1	6	3.75	0.666667	5	1	6	1	6	0.75	7	1	6	1	6	1	6	5.10714	0.5	3	2	1.25	-0.107143	2	1.28571
LTRL590_250010400.1	LtrL590_25:140,800..141,942(-)	380	1143	50S ribosome-binding GTPase, putative	#DIV/0!	0	#DIV/0!	0	0	2	0.666667	1	6	1	6	0	4	5.33333	0	2	0	2	#DIV/0!	0	0	2	1.5	1	6	0	2	0	2	0	2	0	2	0	2	0	2	2.28571	#DIV/0!	0	4.66667	3.83333	3.04762	5.33333	4.22024
LTRL590_250013000.1	LtrL590_25:259,232..260,317(-)	361	1086	SCAMP family, putative	1	10	1.25	9	1.25	9	9.33333	1.25	9	1.25	9	1.66667	8	8.66667	1.4	12	1.4	12	1.25	9	1.4	12	11.25	1.25	9	1.4	12	1.4	12	1.4	12	1.4	12	1.4	12	1.4	12	10.0571	1.25	9	-0.666667	-2.58333	-1.39048	-0.333333	-1.24345
LTRL590_270019500.1	LtrL590_27:570,024..571,106(+)	360	1083	hypothetical protein, conserved	1	2	1	2	1	2	2	1.33333	7	1.66667	8	1	4	6.33333	1	4	1	4	1	4	1	4	4	1.66667	8	1	4	1	4	1	4	1	4	1	4	1	4	4.14286	0.5	3	4.33333	2.33333	2.19048	3.33333	3.04762
LTRL590_170008200.1	LtrL590_17:133,930..134,757(-)	275	828	Qa-SNARE protein, putative	#DIV/0!	2	#DIV/0!	0	#DIV/0!	1	1	1	6	1	6	1.5	5	5.66667	0	3	0	3	0	3	0	3	3	1	6	0	3	0.333333	4	0	3	0	3	0	3	0	3	3.14286	0	2	4.66667	2.66667	2.52381	3.66667	3.38095
LTRL590_210024300.1	LtrL590_21:683,409..683,849(-)	146	441	hypothetical protein, conserved	#DIV/0!	0	#DIV/0!	0	#DIV/0!	0	0	1.5	5	1.5	5	1	4	4.66667	0	2	0	2	0	2	0	2	2	1.5	5	0	2	0	2	0	2	0	2	0	2	0	2	2.14286	0	1	4.66667	2.66667	2.52381	3.66667	3.38095
LTRL590_310039700.1	LtrL590_31:1,418,345..1,419,982(-)	545	1638	acetoin dehydrogenase e3 component-like protein	#DIV/0!	1	0	1	0	1	1	0.333333	4	0.333333	4	0.5	3	3.66667	0.5	3	0.5	3	0.5	3	0.5	3	3	0.333333	4	0.5	3	0.5	3	1	4	1	4	1	4	0.5	3	3.14286	1	2	2.66667	0.666667	0.52381	1.66667	1.38095
LTRL590_360021500.1	LtrL590_36:573,403..573,927(-)	174	525	hypothetical protein, conserved	0.5	3	0.5	3	0.5	3	3	1.5	10	1.5	10	1.25	9	9.66667	1	4	1	4	1	4	1	4	4	1.5	10	1	4	1	4	1	4	1	4	#DIV/0!	2	1	4	4.14286	#DIV/0!	2	6.66667	5.66667	5.52381	7.66667	6.38095
LTRL590_300013300.1	LtrL590_30:242,842..243,432(+)	196	591	4-methyl-5(beta-hydroxyethyl)-thiazole monophosphate synthesis protein, putative	1.5	5	1.5	5	1.5	5	5	0.333333	4	0.333333	4	0.5	3	3.66667	0.75	7	0.75	7	0.75	7	0.75	7	7	0.333333	4	0.75	7	0.75	7	0.75	7	0.75	7	0.75	7	0.75	7	5.67857	0.75	7	-1.33333	-3.33333	-2.0119	-3.33333	-2.50298
LTRL590_230020200.1	LtrL590_23:542,475..543,806(-)	443	1332	hypothetical protein, conserved	1	2	1	2	1	2	2	1.5	5	1.5	5	1	4	4.66667	3	4	3	4	3	4	3	4	4	1.5	5	3	4	3	4	3	4	3	4	3	4	3	4	4	3	4	2.66667	0.666667	0.666667	0.666667	1.16667
LTRL590_140015400.1	LtrL590_14:410,861..411,271(-)	136	411	hypothetical protein	1	2	1	2	1	2	2	2	3	2	3	1	2	2.66667	1	2	1	2	1	2	1	2	2	2	3	1	2	1	2	1	2	1	2	1	2	1	2	2	#DIV/0!	0	0.666667	0.666667	0.666667	2.66667	1.16667
LTRL590_300027800.1	LtrL590_30:805,275..805,784(-)	169	510	Zinc finger C-x8-C-x5-C-x3-H type (and similar), putative	1	2	1	2	1	2	2	0	1	0.5	3	0	5	3	0.333333	4	0.333333	4	0.333333	4	0.333333	4	4	0.5	3	0.333333	4	0.333333	4	0.333333	4	0.333333	4	0.333333	4	0.333333	4	3.33333	1	2	1	-1	-0.333333	1	0.166667
LTRL590_000022200.1	LTRL590_SCAF000112:71,960..72,676(+)	238	717	leucine-rich repeat protein, putative	0.5	3	0.5	3	0.5	3	3	1	4	1	4	1.5	5	4.33333	0.5	3	0.5	3	0.5	3	2	3	3	1	4	1	6	1	6	1	6	1	6	1	6	1	6	5	0.5	3	1.33333	1.33333	-0.666667	1.33333	0.833333
LTRL590_300026400.1	LtrL590_30:737,340..737,921(+)	193	582	hypothetical protein, conserved	0	1	0	1	0	1	1	0.5	3	0.5	3	0	1	2.33333	2	3	2	3	2	3	2	3	3	0.5	3	2	3	3	4	2	3	2	3	2	3	2	3	3	2	3	1.33333	-0.666667	-0.666667	-0.666667	-0.166667
LTRL590_000013400.1	LTRL590_SCAF000064:2,268..2,609(-)	113	342	hypothetical protein	#DIV/0!	1	#DIV/0!	1	#DIV/0!	1	1	3	4	3	4	0	1	3	2	3	2	3	2	3	2	3	3	3	4	2	3	2	3	2	3	2	3	2	3	2	3	3	2	3	2	0	0	0	0.5
LTRL590_240029000.1	LtrL590_24:830,414..830,851(-)	145	438	hypothetical protein, conserved	0	2	0	2	0	2	2	1	4	1	4	1	4	4	0	2	0	2	0	2	0	2	2	1	4	0	2	0	2	0	2	0	2	0	2	0	2	2	#DIV/0!	0	2	2	2	4	2.5
LTRL590_260022700.1	LtrL590_26:628,732..629,055(+)	107	324	hypothetical protein, conserved	#DIV/0!	2	#DIV/0!	2	#DIV/0!	2	2	4	5	4	5	1	2	4	3	4	3	4	3	4	3	4	4	4	5	3	4	3	4	3	4	3	4	3	4	3	4	4	3	4	2	0	0	0	0.5
LTRL590_320023000.1	LtrL590_32:644,681..645,556(-)	291	876	hypothetical protein, conserved	2	3	2	3	#DIV/0!	2	2.66667	0.666667	5	0.666667	5	0.75	7	5.66667	3	4	3	4	3	4	3	4	4	0.666667	5	3	4	3	4	3	4	3	4	3	4	3	4	4	#DIV/0!	2	3	1.66667	1.66667	3.66667	2.5
LTRL590_150008000.1	LtrL590_15:105,445..106,218(+)	257	774	replication Factor A 28 kDa subunit, putative	0	1	0	1	0	1	1	0.333333	4	0.333333	4	0.25	5	4.33333	2	3	2	3	2	3	2	3	3	0.333333	4	2	3	2	3	2	3	2	3	2	3	2	3	3	2	3	3.33333	1.33333	1.33333	1.33333	1.83333
LTRL590_190020700.1	LtrL590_19:645,876..646,253(+)	125	378	ATG8/AUT7/APG8/PAZ2, putative	#DIV/0!	0	#DIV/0!	0	#DIV/0!	0	0	0	4	0	4	0	2	3.33333	0	2	0	2	0	2	0	2	2	0	4	0	2	0	2	0	2	0	2	0	2	0	2	2	0	2	3.33333	1.33333	1.33333	1.33333	1.83333
LTRL590_270013400.1	LtrL590_27:314,194..314,430(+)	78	237	Protein of unknown function, DUF607, putative	#DIV/0!	0	#DIV/0!	0	#DIV/0!	0	0	0.333333	4	0.333333	4	0	2	3.33333	0	2	0	2	0	2	0	2	2	0.333333	4	0	2	0	2	0	2	0	2	0	2	0	2	2	0	2	3.33333	1.33333	1.33333	1.33333	1.83333
LTRL590_360022700.1	LtrL590_36:627,610..628,404(-)	264	795	proteasome alpha 1 subunit, putative	#DIV/0!	0	#DIV/0!	0	#DIV/0!	0	0	0	4	0	4	0	2	3.33333	0	2	0	2	0	2	0	2	2	0	4	0	2	0	2	0	2	0	2	0	2	0	2	2	0	2	3.33333	1.33333	1.33333	1.33333	1.83333
LTRL590_300042700.1	LtrL590_30:1,307,415..1,307,960(+)	181	546	ATP synthase, epsilon chain, putative	#DIV/0!	0	#DIV/0!	0	#DIV/0!	0	0	0	4	0	4	0	4	4	0	2	0	2	0	2	0	2	2	0	4	0	2	0	2	0	2	0	2	0	2	0	2	2	0	2	4	2	2	2	2.5
LTRL590_330024100.1	LtrL590_33:680,354..681,151(+)	265	798	hypothetical protein, conserved	#DIV/0!	0	#DIV/0!	0	#DIV/0!	0	0	3	4	2	3	1.5	5	4	1	2	1	2	1	2	1	2	2	2	3	1	2	1	2	1	2	1	2	1	2	1	2	2	1	2	4	2	2	2	2.5
LTRL590_300038500.1	LtrL590_30:1,158,936..1,159,283(+)	115	348	RNA recognition motif. (a.k.a. RRM, RBD, or RNP domain), putative	#DIV/0!	0	#DIV/0!	0	#DIV/0!	0	0	0.5	3	0.5	3	0	1	2.33333	1	2	1	2	1	2	1	2	2	0.5	3	1	2	1	2	1	2	1	2	1	2	1	2	2	1	2	2.33333	0.333333	0.333333	0.333333	0.833333
LTRL590_110014100.1	LtrL590_11:291,061..291,462(+)	133	402	Ankyrin repeats (3 copies), putative	#DIV/0!	0	#DIV/0!	0	#DIV/0!	0	0	2	3	2	3	1	2	2.66667	1	2	1	2	1	2	1	2	2	2	3	1	2	1	2	1	2	1	2	1	2	1	2	2	1	2	2.66667	0.666667	0.666667	0.666667	1.16667
[truncated: 7,299 more rows]
[truncated: 1 more columns]
